# Supplementary material
Source: PubMed Central journal article supplement (PMC6500554)
Supplement: jiy721_suppl_supplementary_appendix.pdf [file jiy721_suppl_supplementary_appendix.pdf]

Supplementary Text Manuscript Appendix "AS03-Adjuvanted H5N1 Avian  
Influenza Vaccine Modulates Early Innate Immune Signatures In Human  
PBMC"

Version 1.0

August 9, 2018

## Table of Contents

|          |                                                                                  |          |
|----------|----------------------------------------------------------------------------------|----------|
| <b>1</b> | <b>Introduction</b>                                                              | <b>5</b> |
| <b>2</b> | <b>Supplemental methods</b>                                                      | <b>5</b> |
| 2.1      | Analysis population . . . . .                                                    | 5        |
| 2.2      | RNA-Seq experiment . . . . .                                                     | 5        |
| 2.3      | RNA-Seq data preprocessing . . . . .                                             | 6        |
| 2.4      | RNA-Seq statistical analysis . . . . .                                           | 6        |
| 2.4.1    | Statistical model for identifying differentially expressed genes . . . . .       | 6        |
| 2.4.2    | Determination of robustly co-expressed gene clusters . . . . .                   | 7        |
| 2.4.3    | Pathway enrichment analysis . . . . .                                            | 7        |
| 2.4.4    | Regularized linear regression . . . . .                                          | 8        |
| 2.5      | Software . . . . .                                                               | 9        |
| <b>3</b> | <b>Supplemental results</b>                                                      | <b>9</b> |
| 3.1      | Data QC and normalization . . . . .                                              | 9        |
| 3.1.1    | RNA-Seq reference alignment and other experimental statistics . . . . .          | 9        |
| 3.1.2    | Impact of TMM normalization . . . . .                                            | 9        |
| 3.1.3    | Global gene expression patterns, confounding effects, outlying samples . . . . . | 10       |
| 3.1.4    | GC content bias correction . . . . .                                             | 10       |
| 3.2      | Differentially expressed genes . . . . .                                         | 10       |
| 3.3      | Unsupervised gene clustering results . . . . .                                   | 11       |
| 3.4      | Pathway enrichment results . . . . .                                             | 11       |
| 3.5      | Gene responses that best correlate with peak HAI titer response . . . . .        | 12       |

## List of Figures

|            |                                                                                                                     |    |
|------------|---------------------------------------------------------------------------------------------------------------------|----|
| Figure A1  | Consort diagram. . . . .                                                                                            | 13 |
| Figure A2  | Boxplots of technical variables (RNA-Seq, PBMC) . . . . .                                                           | 14 |
| Figure A3  | Boxplots of gene model variables (RNA-Seq, PBMC) . . . . .                                                          | 15 |
| Figure A4  | Starplots of human genome reference alignment statistics (RNA-Seq, PBMC) . . . . .                                  | 16 |
| Figure A5  | Boxplots of $\log_2$ counts per million (RNA-Seq, PBMC, before TMM normalization). . . . .                          | 17 |
| Figure A6  | Boxplots of $\log_2$ counts per million (RNA-Seq, PBMC, after TMM normalization). . . . .                           | 18 |
| Figure A7  | ECDF plots of $\log_2$ counts per million (RNA-Seq, PBMC, before and after TMM normalization). . . . .              | 19 |
| Figure A8  | PCA biplots (RNA-Seq, PBMC, n=136) . . . . .                                                                        | 20 |
| Figure A9  | Non-metric multidimensional scaling biplots based on Euclidean distance (RNA-Seq, PBMC, n=136) . . . . .            | 21 |
| Figure A10 | Non-metric multidimensional scaling biplots based on Spearman correlation distance (RNA-Seq, PBMC, n=136) . . . . . | 22 |
| Figure A11 | Hierarchical clustering plots (RNA-Seq, PBMC, n=136). . . . .                                                       | 23 |
| Figure A12 | Impact of GC on fold change (RNA-Seq, PBMC). . . . .                                                                | 24 |
| Figure A13 | Model QC summary plots (RNA-Seq, PBMC). . . . .                                                                     | 25 |
| Figure A14 | Venn diagrams of DE genes by post-vaccination day (RNA-Seq, PBMC, before GC adjustment). . . . .                    | 26 |
| Figure A15 | Venn diagrams of DE genes by post-vaccination day (RNA-Seq, PBMC, after GC adjustment). . . . .                     | 26 |
| Figure A16 | Gene cluster dendrogram with bootstrap probabilities (RNA-Seq, PBMC, Day 1) . . . . .                               | 27 |
| Figure A17 | Gene cluster dendrogram with bootstrap probabilities (RNA-Seq, PBMC, Day 1-28) . . . . .                            | 27 |
| Figure A18 | Gene cluster time trends of baseline $\log_2$ fold change by treatment (RNA-Seq, PBMC). . . . .                     | 28 |
| Figure A19 | Gene cluster time trends of baseline $\log_2$ fold change by treatment (RNA-Seq, PBMC). . . . .                     | 29 |
| Figure A20 | Gene cluster time trends of baseline $\log_2$ fold change by treatment (RNA-Seq, PBMC). . . . .                     | 30 |
| Figure A21 | Gene cluster time trends of baseline $\log_2$ fold change by treatment (RNA-Seq, PBMC). . . . .                     | 31 |
| Figure A22 | Gene cluster time trends of baseline $\log_2$ fold change by treatment (RNA-Seq, PBMC). . . . .                     | 32 |
| Figure A23 | Pathway map - Influenza A (RNA-Seq, PBMC, Day 1) . . . . .                                                          | 33 |
| Figure A24 | Pathway map - Cytokine-cytokine receptor interaction (RNA-Seq, PBMC, Day 1) . . . . .                               | 34 |
| Figure A25 | Pathway map - Chemokine signaling pathway (RNA-Seq, PBMC, Day 1) . . . . .                                          | 35 |
| Figure A26 | Pathway map - NF-kappa B signaling pathway (RNA-Seq, PBMC, Day 1) . . . . .                                         | 36 |
| Figure A27 | Pathway map - Lysosome (RNA-Seq, PBMC, Day 1) . . . . .                                                             | 37 |
| Figure A28 | Pathway map - Phagosome (RNA-Seq, PBMC, Day 1) . . . . .                                                            | 38 |
| Figure A29 | Pathway map - Osteoclast differentiation (RNA-Seq, PBMC, Day 1) . . . . .                                           | 39 |
| Figure A30 | Pathway map - Complement and coagulation cascades (RNA-Seq, PBMC, Day 1) . . . . .                                  | 40 |
| Figure A31 | Pathway map - Antigen processing and presentation (RNA-Seq, PBMC, Day 1) . . . . .                                  | 41 |
| Figure A32 | Pathway map - Toll-like receptor signaling pathway (RNA-Seq, PBMC, Day 1) . . . . .                                 | 42 |
| Figure A33 | Pathway map - NOD-like receptor signaling pathway (RNA-Seq, PBMC, Day 1) . . . . .                                  | 43 |
| Figure A34 | Pathway map - Cytosolic DNA-sensing pathway (RNA-Seq, PBMC, Day 1) . . . . .                                        | 44 |
| Figure A35 | Pathway map - Jak-STAT signaling pathway (RNA-Seq, PBMC, Day 1) . . . . .                                           | 45 |
| Figure A36 | Pathway map - Fc gamma R-mediated phagocytosis (RNA-Seq, PBMC, Day 1) . . . . .                                     | 46 |

|            |                                                                                                                                                                                                          |    |
|------------|----------------------------------------------------------------------------------------------------------------------------------------------------------------------------------------------------------|----|
| Figure A37 | Pathway map - TNF signaling pathway (RNA-Seq, PBMC, Day 1) . . . . .                                                                                                                                     | 47 |
| Figure A38 | Pathway map - Intestinal immune network for IgA production (RNA-Seq, PBMC, Day 1) . . . . .                                                                                                              | 48 |
| Figure A39 | Pathway map - Prolactin signaling pathway (RNA-Seq, PBMC, Day 1) . . . . .                                                                                                                               | 49 |
| Figure A40 | Pathway map - Salmonella infection (RNA-Seq, PBMC, Day 1) . . . . .                                                                                                                                      | 50 |
| Figure A41 | Pathway map - Pertussis (RNA-Seq, PBMC, Day 1) . . . . .                                                                                                                                                 | 51 |
| Figure A42 | Pathway map - Legionellosis (RNA-Seq, PBMC, Day 1) . . . . .                                                                                                                                             | 52 |
| Figure A43 | Pathway map - Leishmaniasis (RNA-Seq, PBMC, Day 1) . . . . .                                                                                                                                             | 53 |
| Figure A44 | Pathway map - Staphylococcus aureus infection (RNA-Seq, PBMC, Day 1) . . . . .                                                                                                                           | 54 |
| Figure A45 | Pathway map - Tuberculosis (RNA-Seq, PBMC, Day 1) . . . . .                                                                                                                                              | 55 |
| Figure A46 | Pathway map - Hepatitis C (RNA-Seq, PBMC, Day 1) . . . . .                                                                                                                                               | 56 |
| Figure A47 | Pathway map - Hepatitis B (RNA-Seq, PBMC, Day 1) . . . . .                                                                                                                                               | 57 |
| Figure A48 | Pathway map - Measles (RNA-Seq, PBMC, Day 1) . . . . .                                                                                                                                                   | 58 |
| Figure A49 | Pathway map - Herpes simplex infection (RNA-Seq, PBMC, Day 1) . . . . .                                                                                                                                  | 59 |
| Figure A50 | Pathway map - Transcriptional misregulation in cancer (RNA-Seq, PBMC, Day 1) . . . . .                                                                                                                   | 60 |
| Figure A51 | Pathway map - Viral carcinogenesis (RNA-Seq, PBMC, Day 1) . . . . .                                                                                                                                      | 61 |
| Figure A52 | Pathway map - Inflammatory bowel disease (IBD) (RNA-Seq, PBMC, Day 1) . . . . .                                                                                                                          | 62 |
| Figure A53 | Pathway map - Systemic lupus erythematosus (RNA-Seq, PBMC, Day 1) . . . . .                                                                                                                              | 63 |
| Figure A54 | Pathway map - Rheumatoid arthritis (RNA-Seq, PBMC, Day 1) . . . . .                                                                                                                                      | 64 |
| Figure A55 | Scatterplots that summarize the correlation between peak $\log_2$ HAI titer and $\log_2$ fold change response for genes identified using regularized linear regression (RNA-Seq, PBMC, Day 1) . . . . .  | 65 |
| Figure A56 | Scatterplots that summarize the correlation between peak $\log_2$ HAI titer and $\log_2$ fold change response for genes identified using regularized linear regression (RNA-Seq, PBMC, Day 3) . . . . .  | 65 |
| Figure A57 | Scatterplots that summarize the correlation between peak $\log_2$ HAI titer and $\log_2$ fold change response for genes identified using regularized linear regression (RNA-Seq, PBMC, Day 7) . . . . .  | 66 |
| Figure A58 | Scatterplots that summarize the correlation between peak $\log_2$ HAI titer and $\log_2$ fold change response for genes identified using regularized linear regression (RNA-Seq, PBMC, Day 28) . . . . . | 67 |

## List of Tables

|           |                                                                                                   |     |
|-----------|---------------------------------------------------------------------------------------------------|-----|
| Table A1  | Number of excluded genes by category/chromosome (RNA-Seq, PBMC) . . . . .                         | 68  |
| Table A2  | Number of genes that passed the low expression cut off (RNA-Seq, PBMC). . . . .                   | 68  |
| Table A3  | Summary statistics (RNA-Seq, PBMC, technical variables) . . . . .                                 | 68  |
| Table A4  | Summary statistics (RNA-Seq, PBMC, gene model variables) . . . . .                                | 69  |
| Table A5  | Spearman correlation with technical variables (RNA-Seq, PBMC, original variables). . . . .        | 69  |
| Table A6  | Spearman correlation with technical variables (RNA-Seq, PBMC, standardized variables). . . . .    | 69  |
| Table A7  | Spearman correlation with gene model variables (RNA-Seq, PBMC, original variables). . . . .       | 70  |
| Table A8  | Spearman correlation with gene model variables (RNA-Seq, PBMC, standardized variables). . . . .   | 70  |
| Table A9  | Significant gene clusters (RNA-Seq, PBMC, Day 1) . . . . .                                        | 78  |
| Table A10 | Significant gene clusters (RNA-Seq, PBMC, Day 1-28) . . . . .                                     | 81  |
| Table A11 | Overview of gene sets used for the enrichment analysis (RNA-Seq). . . . .                         | 82  |
| Table A12 | Overview of differential genes that mapped to any gene set by category (RNA-Seq). . . . .         | 82  |
| Table A13 | Significantly enriched KEGG Pathways (RNA-Seq, PBMC, Day 1) . . . . .                             | 83  |
| Table A14 | Significantly enriched MSigDB GO Biological Processes (RNA-Seq, PBMC, Day 1) . . . . .            | 85  |
| Table A15 | Significantly enriched MSigDB GO Cellular Components (RNA-Seq, PBMC, Day 1) . . . . .             | 86  |
| Table A16 | Significantly enriched MSigDB GO Molecular Functions (RNA-Seq, PBMC, Day 1) . . . . .             | 86  |
| Table A17 | Significantly enriched MSigDB Reactome Pathways (RNA-Seq, PBMC, Day 1) . . . . .                  | 87  |
| Table A18 | Significantly enriched MSigDB Chemical/Genetic Perturbation Sets (RNA-Seq, PBMC, Day 1) . . . . . | 106 |
| Table A19 | Significantly enriched MSigDB Immunologic Signature Sets (RNA-Seq, PBMC, Day 1) . . . . .         | 125 |
| Table A20 | Regularized linear logistic regression model summary statistics (RNA-Seq, PBMC) . . . . .         | 126 |
| Table A21 | List of R packages and versions used for the analyses presented in this report. . . . .           | 126 |

## 1 Introduction

This appendix provides supporting information for the manuscript entitled "AS03-Adjuvanted H5N1 Avian Influenza Vaccine Modulates Early Innate Immune Signatures In Human PBMC". The study for which this data was collected, was a single center randomized, double-blinded, controlled, Phase I small targeted prospective study in healthy male and non-pregnant female subjects, 19 to 39 years old, inclusive, designed to assess the safety, reactogenicity, immunogenicity, and molecular immune responses of an intramuscular (IM) inactivated monovalent influenza A/H5N1 (Hemagglutinin [HA] of A/Indonesia/05/2005) split-virus (SV) vaccine manufactured by Sanofi Pasteur administered at 3.75 mcg given with the AS03 adjuvant (SV-AS03) manufactured by GlaxoSmithKline (GSK) or Phosphate Buffered Saline (PBS) diluent (SV-PBS). Subjects who met the entry criteria for the study and provided informed consent were randomized 1:1 to SV-AS03 and SV-PBS vaccine and each subject received two doses of the respective vaccine approximately 28 days apart (**Figure A1**).

## 2 Supplemental methods

### 2.1 Analysis population

The analysis population included all subjects who met all inclusion and exclusion criteria, who contributed at least one pre-vaccination blood sample (at Day -28, -14, or 0) and at least one post-vaccination blood sample (at Day 1, 3, 7, or 28) for which valid results were reported. The analyses included subjects by study product actually received. This population included 20 subjects (10 for each vaccine group randomly labeled) including subject B in the SV-AS03 group, who received the second vaccination (Day 28) out-of-window.

### 2.2 RNA-Seq experiment

Whole blood samples (90 mL) underwent Ficoll separation to yield PBMC and polymorphonuclear cell (PMN) populations. Bulk PBMC were frozen in homogenization buffer (Maxwell 16 LEV simply RNA kit, Promega) and stored at -80°C. Total RNA was extracted from each PBMC sample using the Maxwell 16 LEV simply RNA kit (Promega Corp.). RNA was quantified by Quant-iT RiboGreen RNA Assay, and samples were evaluated on the Caliper LabChip GX to assess RNA integrity. 100ng total RNA and RNA integrity numbers greater than 7 were required for proceeding to downstream RNA-Seq applications. Poly(A) mRNAs were isolated using NEBNext magnetic oligo d(T)<sub>25</sub> beads. NEBNext mRNA Library Prep Reagent Set for Illumina (New England BioLabs Inc.) was used to prepare individually bar-coded next generation sequencing expression libraries. Overall, 136 RNA sequence libraries were constructed, one for each subject and study visit combination. Construction of four libraries failed due to insufficient amounts of RNA. Libraries were pooled (10mM each sample). Approximately 50-bp,

paired-end read sequencing with a sequencing coverage of 50 million reads / 25 million fragments (paired-end reads) was performed for each library utilizing a 200 cycle TruSeq SBS HS v3 kit on an Illumina HiSeq2000 sequencer (Illumina, Inc.).

## 2.3 RNA-Seq data preprocessing

Reference Consortium Human Build 37 (GRCh37) genomic assembly was used as reference sequence. Human gene models and annotations were obtained from the Ensembl database (Version 63, June 2011). Paired-end reads were mapped against the human reference genome using the *TopHat* splice-aware read aligner (Version 2.0.0). Ensembl gene models were used to guide the alignment process. Alignment QC statistics were obtained using the *RSeQC* software (Version 2.3.7). Gene expression quantification was carried out using the *featureCounts* function as implemented in the *Subread* software (Version 1.4.6). *featureCounts* options were set to count fragments, i.e. paired-end reads that reconstitute a fragment for which both ends were successfully mapped to a gene. Reads/fragments that overlapped with multiple genes or had multiple mapping locations on the reference genome were excluded. Systematic sample differences in sequencing depth (number of fragments) were corrected for by calculating RNA composition-robust scaling factors for each sample using the trimmed mean of M-values (TMM) method (Liao et al., 2013; Robinson and Oshlack, 2010) as implemented in the *edgeR* software (Version 3.2.4). TMM normalization was executed across all 136 samples. Post normalization, 4,185 genes that were known ribosomal and mitochondrial RNA genes or genes located on the X or Y chromosomes were excluded to avoid gender-specific effects leaving a total of 46,870 genes to be analyzed (**Table A1**). For data visualization and multivariate analyses, TMM normalized moderated  $\log_2$  fragment counts per million were computed using *edgeR*. To avoid taking the log of zero values, a TMM-scaled fragment count of 0.5 was added to each gene (the imputed value was different for each sample based on its TMM scaling factor). Genes with less than 1 count per million in 60% of the samples at any post-baseline study visit (Days 1, 3, 7, 28) were deemed lowly expressed and were excluded (at a minimum, 8 samples were required to pass the cut-off). For time-trend analyses, filtering was carried out for all samples keeping genes that met the cut-off at any post-baseline day. For differential analysis, filtering was carried out for each post-baseline study visit sample. **Table A2** lists the number of genes that were retained for each study visit day. Subject specific  $\log_2$  fold changes from baseline were calculated for each subject and post-baseline day (Day 1, 3, 7, 28) by subtracting the mean of the  $\log_2$  baseline values from each of the subject's post-baseline days.

## 2.4 RNA-Seq statistical analysis

### 2.4.1 Statistical model for identifying differentially expressed genes

For each post-vaccination day, negative binomial generalized linear models with a dispersion estimation component that leverages information across genes as implemented in *edgeR* were fitted. In particu-

lar, trended dispersion estimates based on the mean-variance trend across all genes were obtained, and gene-wise negative binomial dispersion parameters were shrunk towards the trended dispersion estimates using empirical Bayes as implemented in *edgeR*. The design matrix included fixed effects for subject, study day (baseline or post-baseline day), and a day\*treatment interaction term. The study visit day and treatment group effects had two fixed levels (0: for baseline days -28, -14 or 0, and 1: for the respective post-vaccination day), and (0:SV-PBS and 1:SV-AS03), respectively. The subject effect for estimating subject-specific mean baseline levels was added to account for correlations between samples from the same subject. Maximum likelihood estimates of the coefficients including baseline levels were estimated using the parallelized line search algorithm described by McCarthy et al. (2012). The interaction term represents the  $\log_2$  fold change difference (LFCD) between SV-AS03 and SV-PBS treatment group responses. The statistical significance of the interaction term was evaluated for each gene using a likelihood ratio test to identify genes that significantly differed in their response from baseline between treatment groups. To control for testing multiple genes, the false-discovery rate (FDR) based on the Benjamini-Hochberg procedure as implemented in the *p.adjust* R function was applied. Genes with a FDR-adjusted p-value  $\leq 0.05$  and a fold change of  $\geq 1.5$ -fold (up or down regulation based on LFCD) were deemed to be significantly differentially expressed between treatment groups.

#### **2.4.2 Determination of robustly co-expressed gene clusters**

Pairwise distances between genes based on their baseline  $\log_2$  change profiles were calculated for each post-vaccination day individually (Day 1, 3, 7, 28) as well as across all post-vaccination days (Day 1-28). Uncentered Pearson correlation distance was used as distance measure as  $\log_2$  fold changes are, by definition, centered around zero. The input list of genes for this clustering analysis included DE genes that were identified for any of the four post-vaccination days. Clusters were obtained using the hierarchical complete linkage clustering algorithm. To evaluate robustness of gene clusters, multiscale bootstrapping (Suzuki and Shimodaira, 2006) was carried out separately for each post-vaccination day using varying dataset sizes (0.4\*N, 0.5\*N, 0.6\*N, 0.7\*N, 0.8\*N, 0.9\*N, 1\*N, 1.1\*N, 1.2\*N, 1.3\*N; where N stands for the respective dataset size). For each dataset size bin, 1,000 bootstrap samples were obtained, and bootstrap probabilities and p-values were calculated. A p-value cut-off of 0.05 was applied to determine significant clusters. The maximum distance to form a significant cluster was set to 0.5 (equivalent to minimum uncentered Pearson correlation of 0.5). Clusters that were formed at larger distance were excluded.

#### **2.4.3 Pathway enrichment analysis**

Pathway enrichment analysis was carried out separately for each post-vaccination day. Genes were grouped and analyzed based on 8,101 known pathways/modules/gene sets obtained from the KEGG database (Version 70.0 (06/09/2014), Kanehisa et al., 2012) and MSigDB (Version 4.0 (05/31/2013),

Liberzon et al., 2011). The KEGG subset included KEGG pathways and KEGG modules. The MSigDB gene set collection comprised GO Biological Processes, GO Cellular Components, GO Molecular Functions, Reactome Pathway, BioCarta Pathway, Chemical/Genetic Perturbations, and Immunologic Signature pathways/gene sets. **Table A11** summarizes the gene set collection used in this report. For each of these gene sets, enrichment was evaluated using the *goseq* R package (Version 1.12.0). The GOseq algorithm adjusts for gene length bias when modeling the null distribution (Young et al., 2010). Gene length was specified as the length of the longest cDNA of a gene. Gene length information was obtained from the *tweeDEseqCountData* R package (Version 1.0.9). GOseq probability weighting functions were estimated for each post-vaccination day based on DE genes. Null distributions were generated using GOseq's random sampling option (100,000 randomizations were applied). Lists of enriched gene sets were obtained separately for each of the nine category types (KEGG pathways, KEGG modules, GO Biological Processes, etc.). To control for testing multiple gene sets, the false-discovery rate (FDR) based on the Benjamini-Hochberg procedure as implemented in the *p.adjust* R function was applied. Gene sets with a  $FDR \leq 0.01$  were considered to be significantly enriched. Enrichment trends across post-vaccination days were visualized using heatmaps and binary Jaccard-distance based complete-linkage hierarchical clustering. For significantly enriched KEGG pathways, color-coded KEGG pathway maps were generated (KEGG KGML pathway layout information Version 82.0, 06/06/2017). Pathways were color-coded by mean  $\log_2$  fold change difference between treatments. If nodes in the pathway referred to multiple genes, the median  $\log_2$  fold change was used to set the background color of a node (red: up-regulated in the adjuvant group compared to the unadjuvanted group, blue: down-regulated in the adjuvanted group compared to the unadjuvanted group). If one of the genes of a multi-gene node was significantly enriched, the node label and border was color-coded (red: up-regulated, blue: down-regulated, yellow: conflict if one gene was up but another was down regulated).

#### 2.4.4 Regularized linear regression

For each post-vaccination day, a regularized linear regression model was fit to identify gene responses that were correlated with  $\log_2$  peak hemagglutination inhibition (HAI) antibody titer using the *glmnet* R package (Version 2.0-2). The predictor variable set was based on  $\log_2$  baseline fold changes and included genes with an average absolute fold change from baseline  $\geq 1.5$  in at least one of the two seroprotection response groups (group 1:  $HAI \geq 1:40$ , group 2:  $HAI < 1:40$ ). To avoid overfitting ( $n \ll p$  and collinearity among gene responses) and facilitate variable selection, an elastic net regularization step (combination of L1 Lasso and L2 ridge penalization,  $\alpha = 0.5$ ) was included as part of the fitting procedure. Leave-one-out cross validation was used to determine the optimum regularization parameter  $\lambda$  that minimizes the model mean squared error.



## 2.5 Software

Data was analyzed using the *R statistical programming language* and *R Bioconductor* packages. A complete listing of R and package versions are given in **Table A21**. This report was generated using the *knitr* R package (Version 1.5) and *LaTeX* typesetting software (Version TeX Live 2012/Debian). The operating system used was *Ubuntu* (Version 13.04).

## 3 Supplemental results

### 3.1 Data QC and normalization

#### 3.1.1 RNA-Seq reference alignment and other experimental statistics

**Tables A3 and A4** summarize key technical variables and alignment statistics. On average, 48.3 million individual reads were mapped for each sample against the reference, of which, 94% uniquely mapped to a location on the human reference assembly. There were no cases in which one of the paired-end reads mapped to different chromosomes. When reads were mapped against known gene models, on average, 17.4 million fragments (combined paired reads that mapped to the same gene) were uniquely counted in the expression quantification step. Sample mean %GC content of mapped sequences ranged from 50% to 53%. The number of Illumina flow cells per sample ranged from 2 to 3. The range for Illumina lanes was 3 to 4 lanes per sample.

The vast majority (on average 86.6%) of tags (spliced reads) mapped to known<sup>1</sup> exon regions followed by intronic (12%), and intergenic regions (1.4%). Coverage for coding DNA sequence regions was, on average, 529 tags per Kb of sequence, compared to 4.8 tags per Kb for introns, and a maximum of 4.2 tags per Kb for intragenic regions (10Kb up/downstream). Novel splice junctions were not analyzed in this sub study. Boxplots of subsets of these statistics are given in **Figures A2 and A3**. Starplots that visualize alignment statistics across time points and treatments are shown in **Figure A4**. Subject-specific patterns were not observed, and no strong effects related to treatment or study visit day were evident. The Day 7 sample for Subject G had the lowest number of total and mapped reads when compared to the rest of the samples **Figure A4**.

#### 3.1.2 Impact of TMM normalization

The impact of between-sample normalization using the trimmed mean of M-values (TMM) method is visualized in **Figures A5 to A7**. The plots summarize log<sub>2</sub> counts per million (LCPM) distributions for each sample before and after normalization. The medians and interquartile ranges of LCPM distributions were very similar for most of the 136 samples before and after normalization. For some samples

---

<sup>1</sup>Ensembl gene models (Version 63, June 2011)

(e.g. the Day 7 sample for Subject G), alignment of LCPM distributions was slightly improved following TMM normalization. Subsequent results are based on TMM-normalized data.

### 3.1.3 Global gene expression patterns, confounding effects, outlying samples

Principal component analysis (PCA), non-metric multidimensional scaling, and hierarchical clustering results based on LCPM gene variables are shown in **Figures A8 to A11**. The Day 7 sample for Subject G showed an outlying profile in the MDS plot based on its Spearman correlation distance compared to all other samples (**Figure A10**) as well as based on Euclidean distance when using hierarchical clustering analysis **Figure A11**. For the same sample, outlying reference alignment statistics compared to all other samples were observed (**Figure A4**). Thus this sample was flagged as a global outlier and removed from downstream analyses.

### 3.1.4 GC content bias correction

To evaluate the impact of sample %GC content on  $\log_2$  fold change between treatments, negative binomial models were fit with and without sample-specific %GC content added as a covariate. Under the assumption that %GC content does not have an influence on model outcome, GC content rich/poor genes would exhibit a random pattern with respect to their fold change with an overall center of fold changes at zero. Any deviation from this pattern would indicate a systematic bias. **Figure A12** shows the estimated  $\log_2$  fold changes (SV-AS03 adjuvant group vs. unadjuvanted group) plotted against gene-specific %GC content before and after correcting for % sample GC content (left two panel columns). Panels to the right show MA plots with  $\log_2$  fold change plotted against average LCPM with genes colored according to their GC content (in red:  $>60\%$ ) and (in blue:  $<40\%$ ). Generally, none or slight effects were observed (e.g. for PBMC at Day 3). Inclusion of sample %GC content as a covariate corrected the  $\log_2$  fold change bias, reestablishing a center at zero fold change and random pattern for high/low GC genes (**Figure A12**).

## 3.2 Differentially expressed genes

Venn diagrams that summarize DE gene overlap across post-baseline days before and after GC adjustment are summarized in **Figures A14 and A15**. Negative binomial dispersion trends of GC-adjusted models and MA plots that contrast average gene expression (LCPM) versus treatment fold change difference (LFCD) are provided in **Figure A13**.

### 3.3 Unsupervised gene clustering results

**Tables A9 and A10** list clusters of genes that were found to be robustly co-expressed based on their  $\log_2$  fold change profile as determined by multiscale bootstrap resampling. Dendrograms with bootstrap probabilities and gene cluster assignments are summarized in **Figures A16 and A17**. Mean gene cluster  $\log_2$  fold changes from baseline were plotted for each vaccine group across post-vaccination days (**Figures A18 to A22**). A subset of clusters are discussed:

**Immunoglobulin gamma binding receptor gene cluster** PBMC cluster *CPMCP1-008* (n=2: *FCGR1A*, *FCGR1B*) showed strongly increased gene expression levels (>4-fold on average) for the adjuvant group at Day 1 while levels remained close to baseline for the unadjuvanted group (**Figure A18**). For both genes, levels in the adjuvant group returned to baseline levels by Day 3. This cluster contained genes that encode for Immunoglobulin gamma (IgG) Fc receptor I binding proteins which are known to bind to the Fc region of IgG and play a role in innate as well as adaptive immune responses (see also related pathway maps **Figures A28 and A35**).

**Interferon-responsive gene cluster** The Day 1 PBMC cluster *CPMCD1-021* (n=7: *GBP1*, *GBP2*, *GBP3*, *STAT1*, *PARP9*, *WARS*, *LAP3*), showed an increase of >2.5-fold on average for the adjuvant group at Day 1 while levels remained close to baseline for the unadjuvanted group (**Figure A19**). For all genes, levels in the adjuvant group returned to baseline levels by Day 3. This cluster contained several interferon-responsive genes or genes that induce the expression of interferon-responsive genes including 3 genes that encode for guanylate-binding protein (GBP) family proteins and *STAT1*, and *PARP9*, all of which are known to protect against viral infection.

**IP-10 cytokine cluster** The Day 1-Day28 PBMC cluster *CPMCD1D28-012* (n=15: *APOBEC3A*, *CXCL10*, *EPST11*, *IFI35*, *JAK2*, *MYOF*, *ODF3B*, *PARP14*, *PARP9*, *SAMD4A*, *SAMD9L*, *SCO2*, *SERPING1*, *STAT2*, *TYMP*), had an increase of >2-fold on average for the adjuvant group at Day 1 while levels remained close to baseline for the unadjuvanted group (**Figure A22**). Levels in the adjuvant group reached baseline levels by Day 3. This cluster contained Jak-STAT signaling pathway genes, genes that induce the expression of interferon-responsive genes (*PARP9*, *PARP14*), an interferon-responsive gene (*IFI35*), and the gene that encodes for IP-10 cytokine (*CXCL10*) (see also related pathway maps **Figures A23 and A35**).

### 3.4 Pathway enrichment results

Gene set enrichment analysis was carried out by post-vaccination day using published gene sets outlined in **Table A11** (**Table A12**). Significantly enriched pathways/gene sets for each of the nine pathway

categories are provided in **Tables A13 to A19**. Enriched KEGG pathway maps color-coded by expression fold change and fold change significance are shown in **Figures A23 to A54**.

### **3.5 Gene responses that best correlate with peak HAI titer response**

A regularized linear regression model was fit for each post-vaccination day to identify combinations of gene responses that best correlate with  $\log_2$  peak HAI titer. **Table A20** summarizes regularized linear regression model statistics including the minimum cross-validated mean square error (MSE) for each model. Scatterplots that summarize the correlation between peak  $\log_2$  HAI titer and  $\log_2$  fold change response for each gene that was selected by the best model are shown in **Figures A55 to A58**.

**Figures**

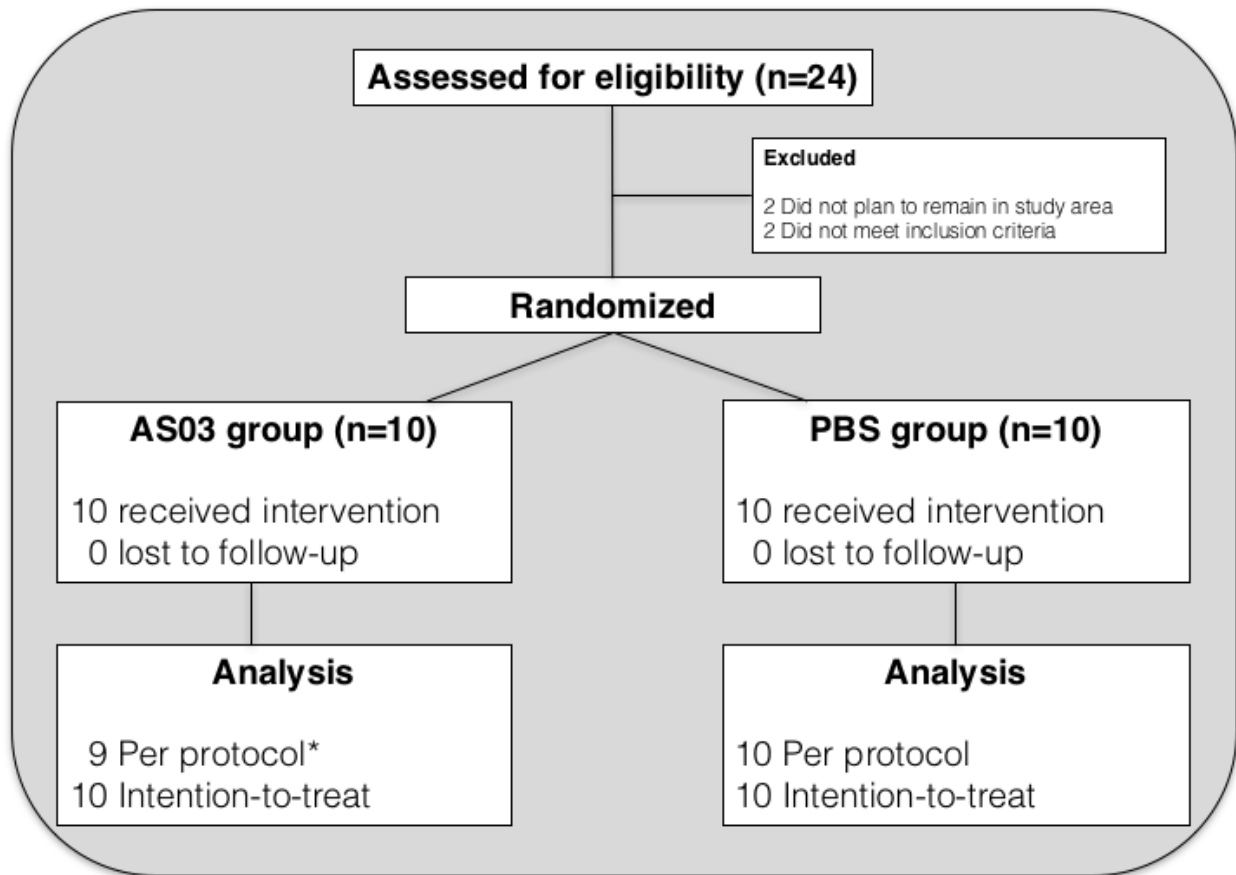

\* One subject received Vaccine Dose 2 on Study Day 39 (9 days outside of window)

**Figure A1:** Consort diagram outlining study group enrollment and randomization.

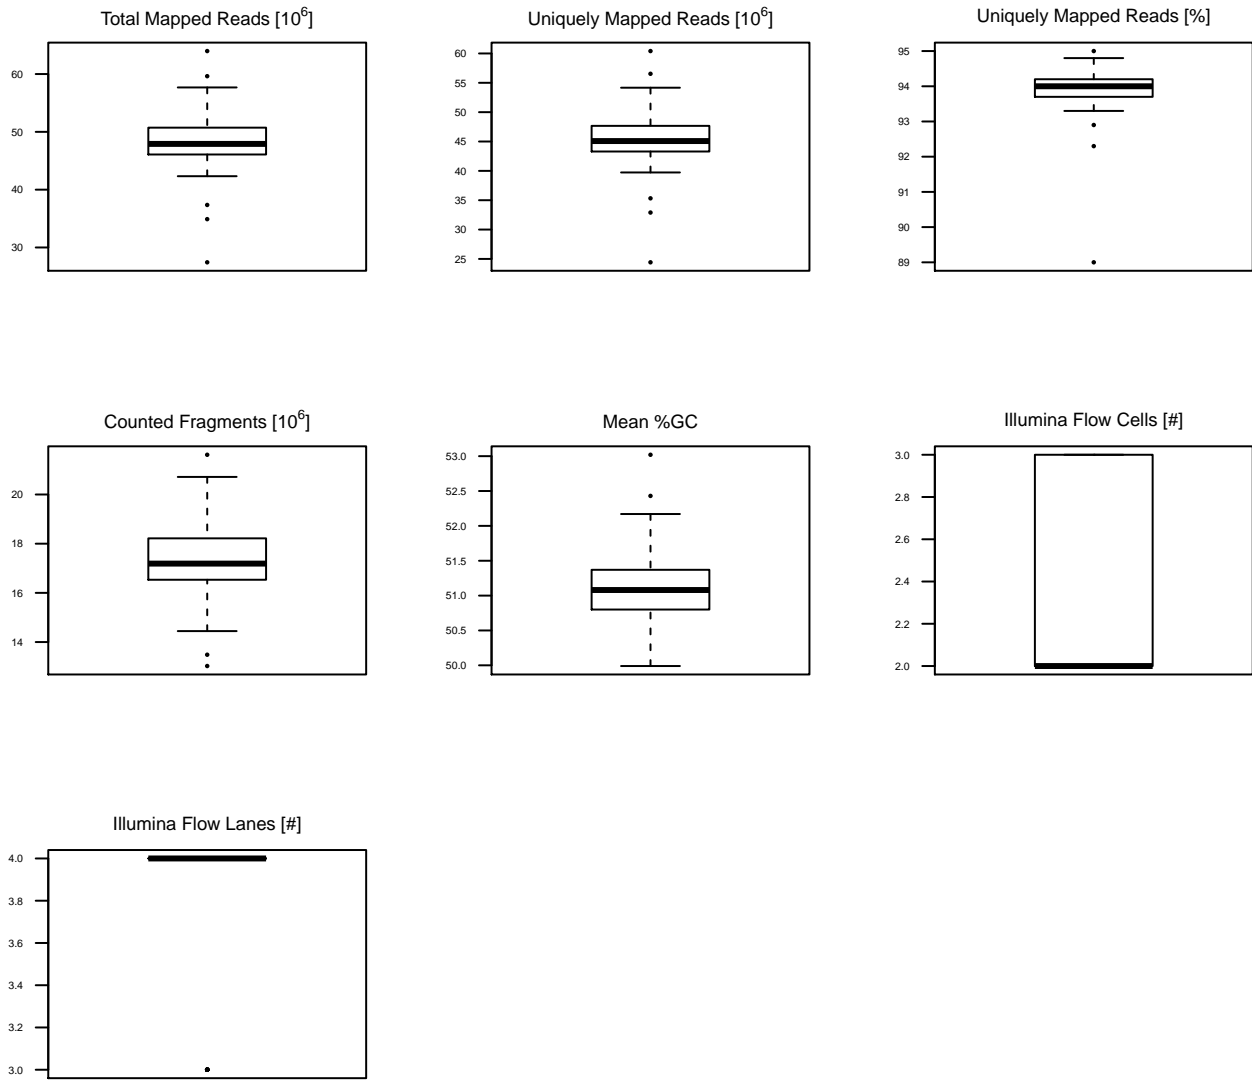

**Figure A2:** Boxplots of technical variables (RNA-Seq, PBMC).

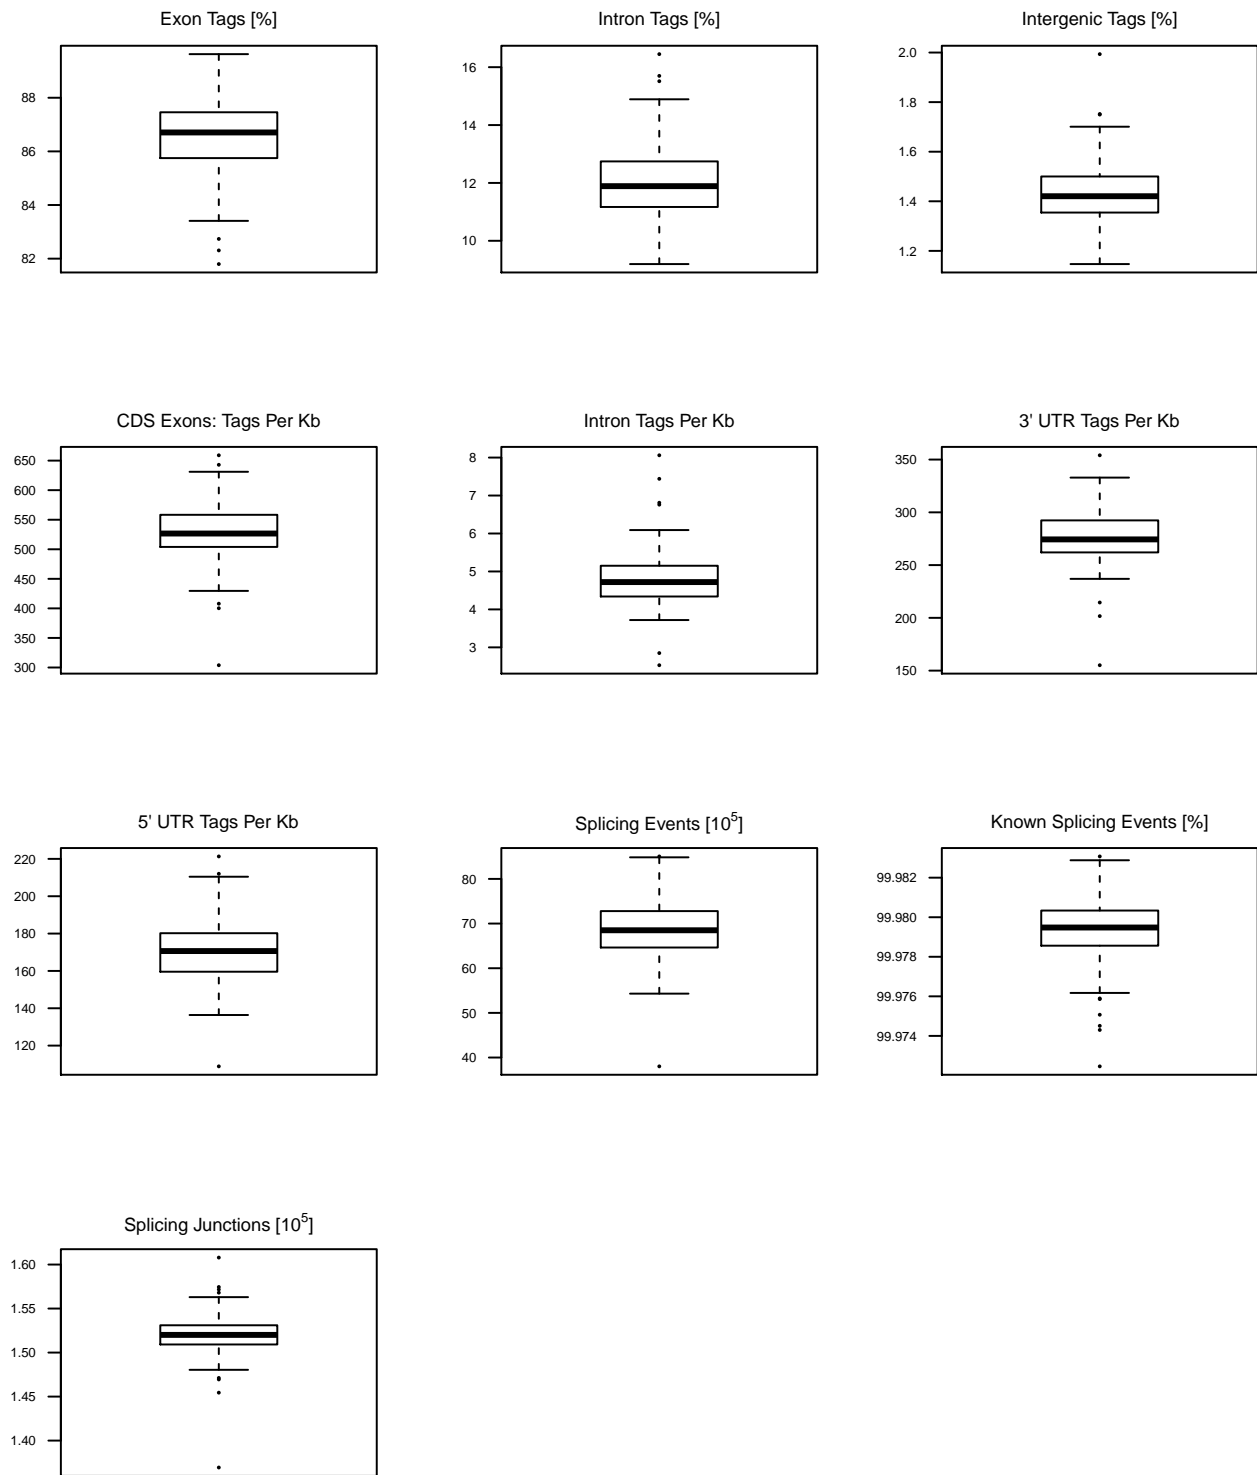

**Figure A3:** Boxplots of gene model variables (RNA-Seq, PBMC).

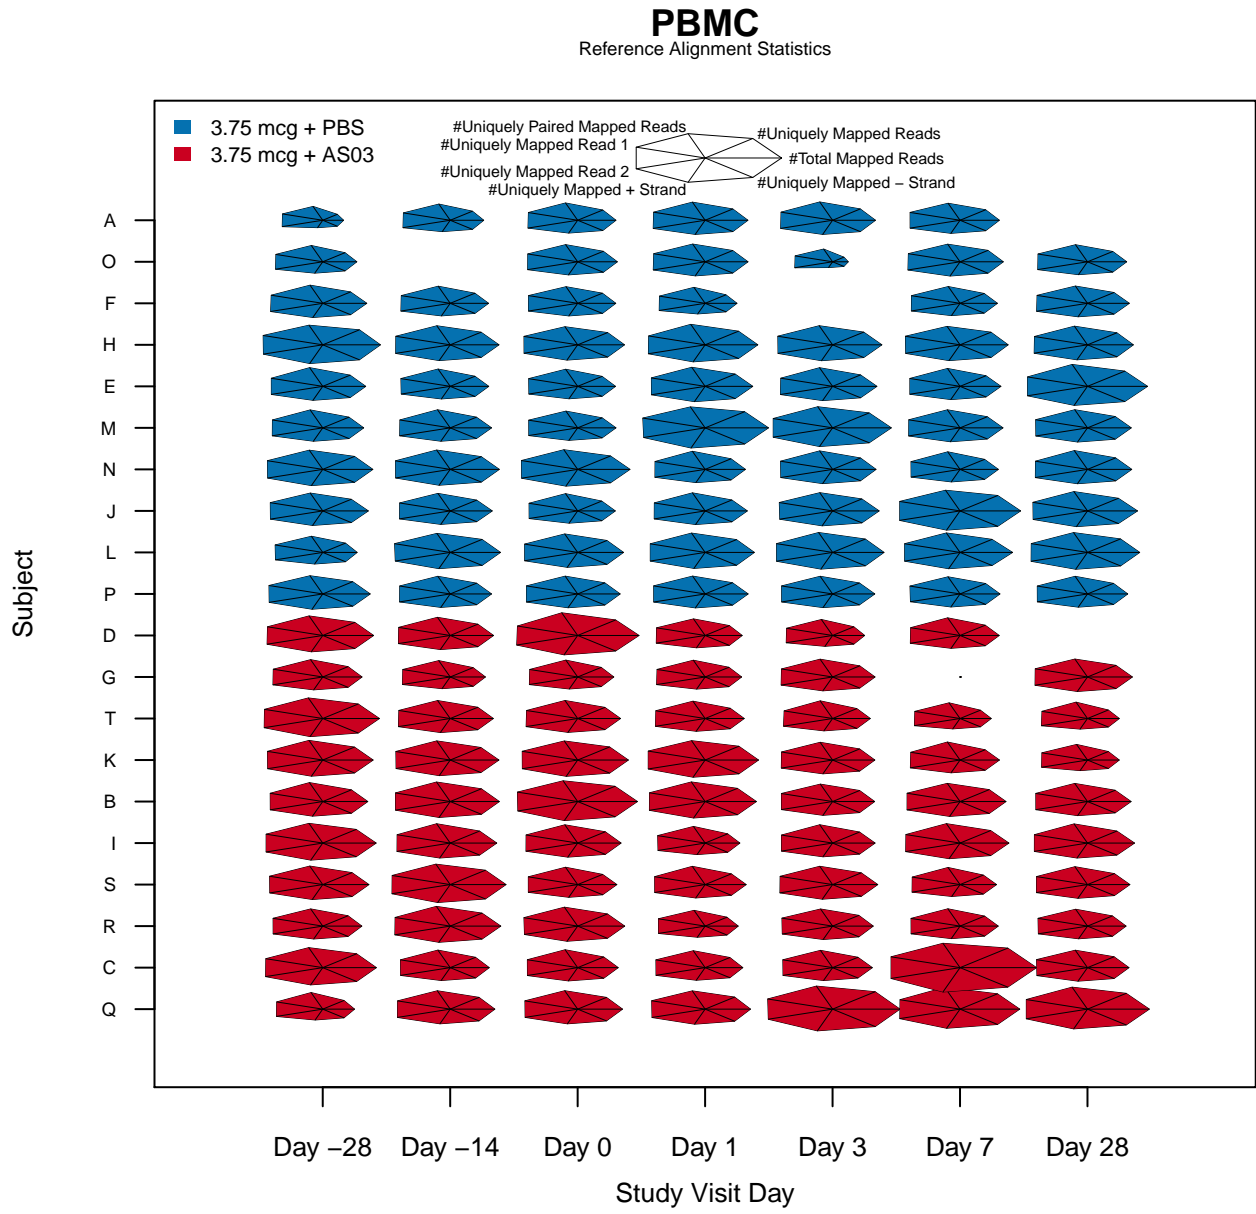

**Figure A4:** Starplots of human genome reference alignment statistics (RNA-Seq, PBMC).



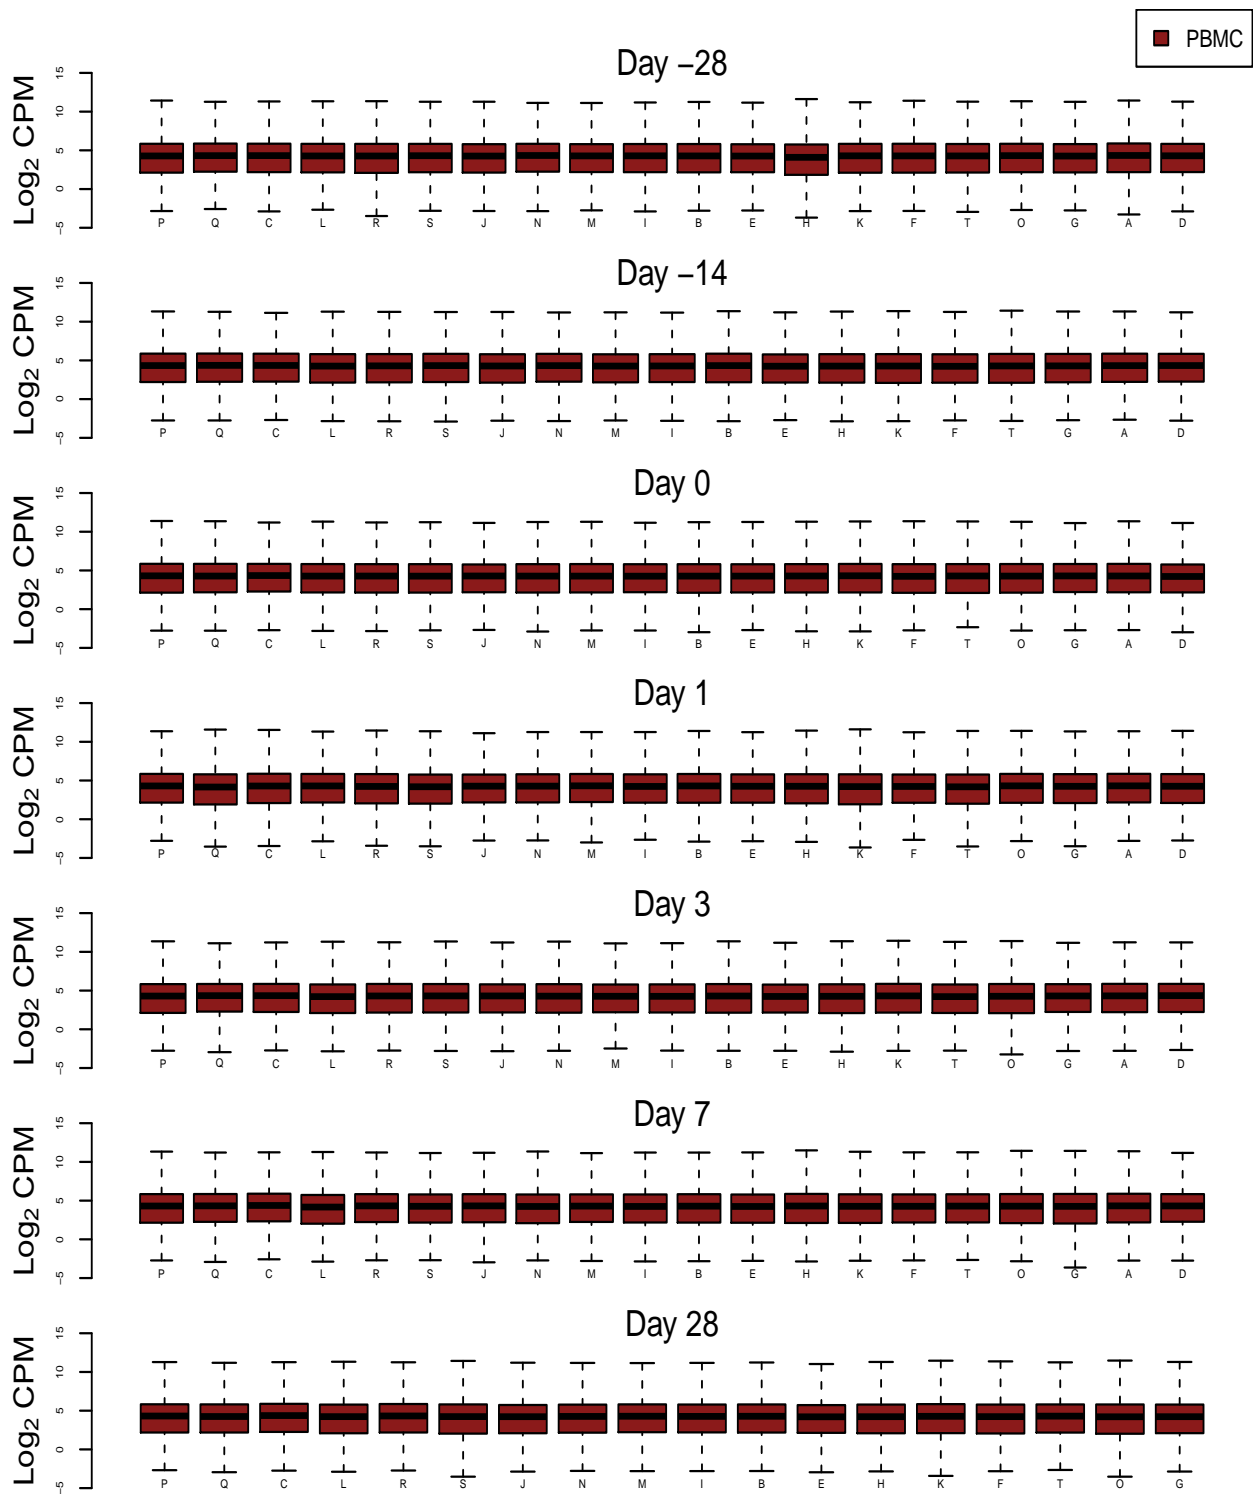

**Figure A5:** Boxplots of  $\log_2$  counts per million before TMM normalization. Boxplot outliers are omitted for clarity. Ordering by day was chosen to optimize visual representation (RNA-Seq, PBMC).

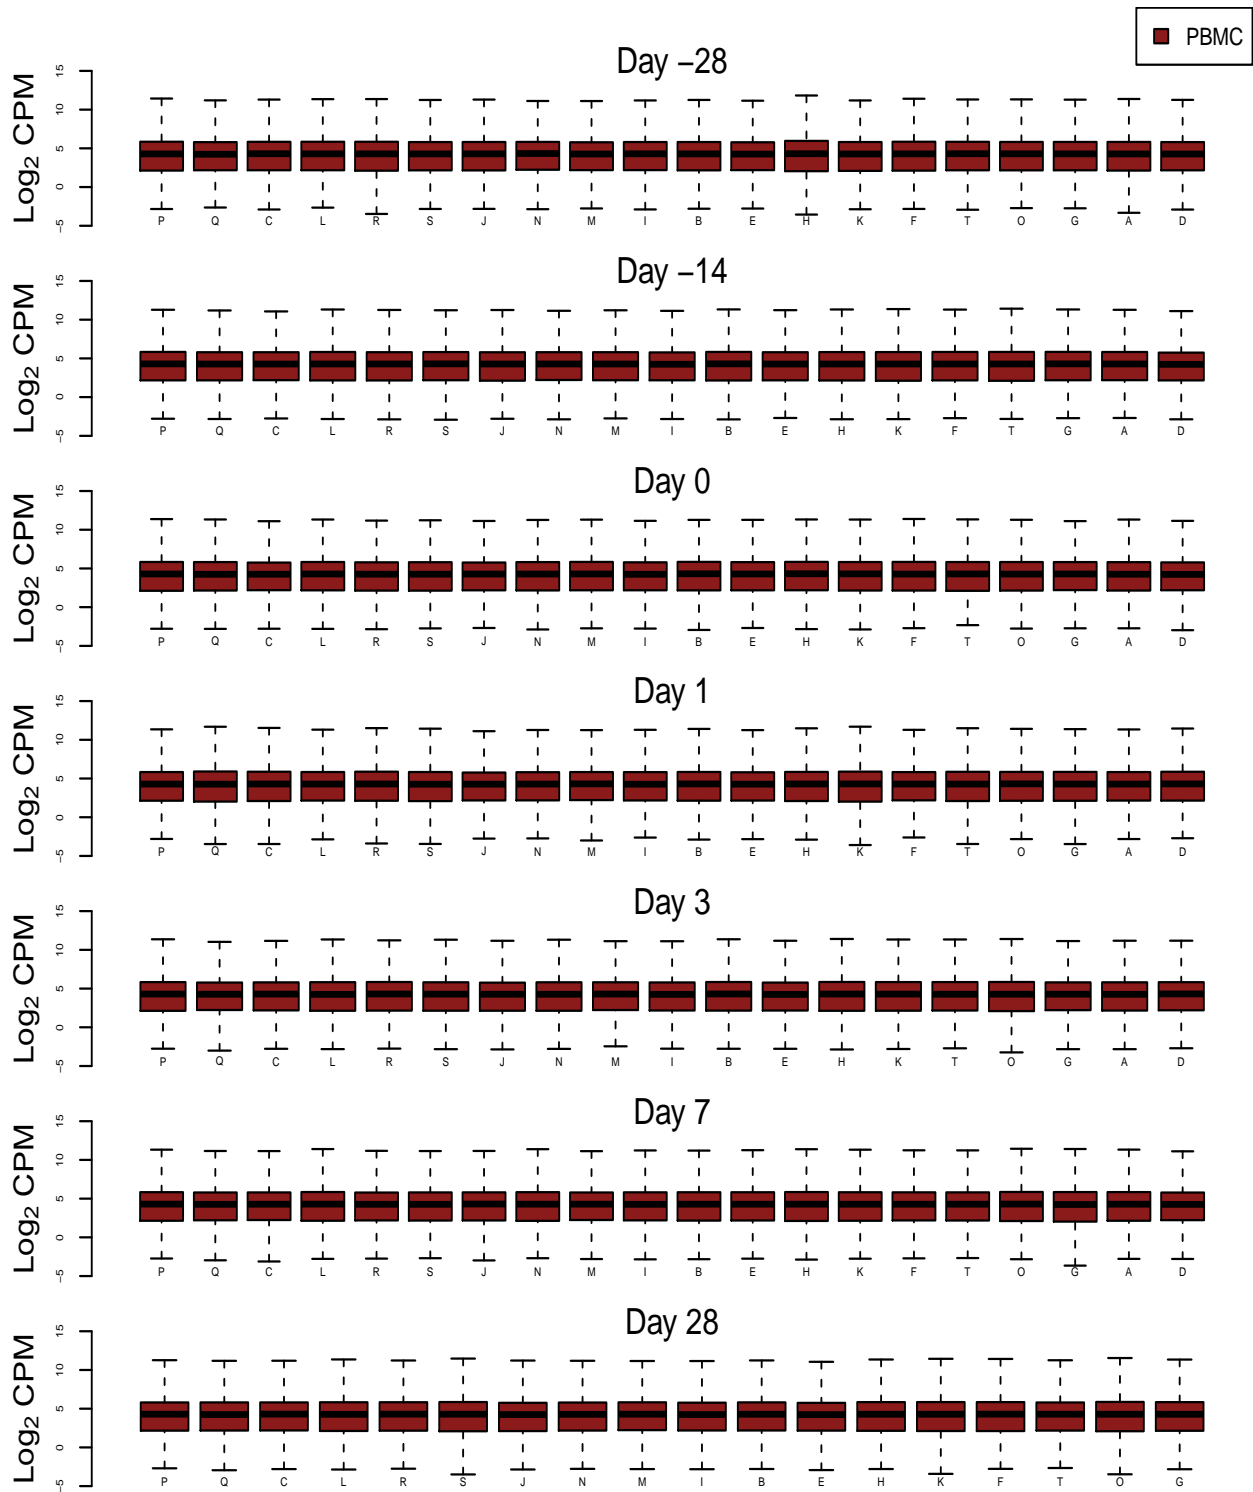

**Figure A6:** Boxplots of  $\log_2$  counts per million after TMM normalization. Boxplot outliers are omitted for clarity. Ordering by day was chosen to optimize visual representation (RNA-Seq, PBMC).

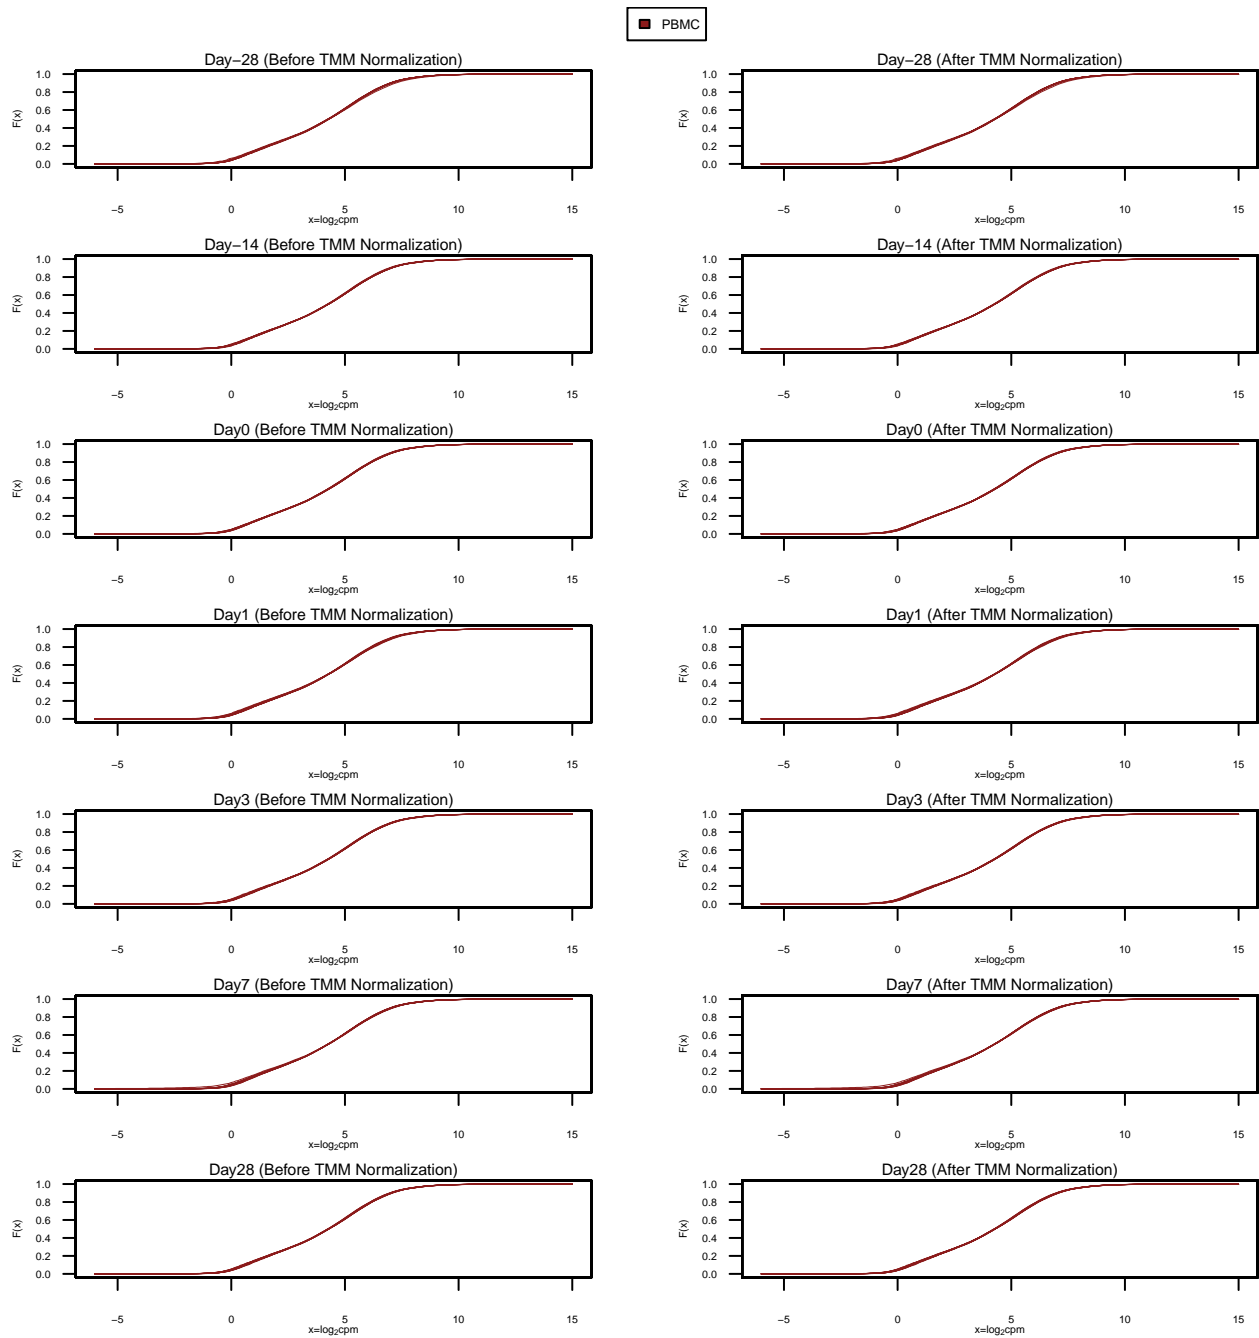

**Figure A7:** Empirical cumulative distribution function plots of  $\log_2$  counts per million before and after TMM normalization (RNA-Seq, PBMC).

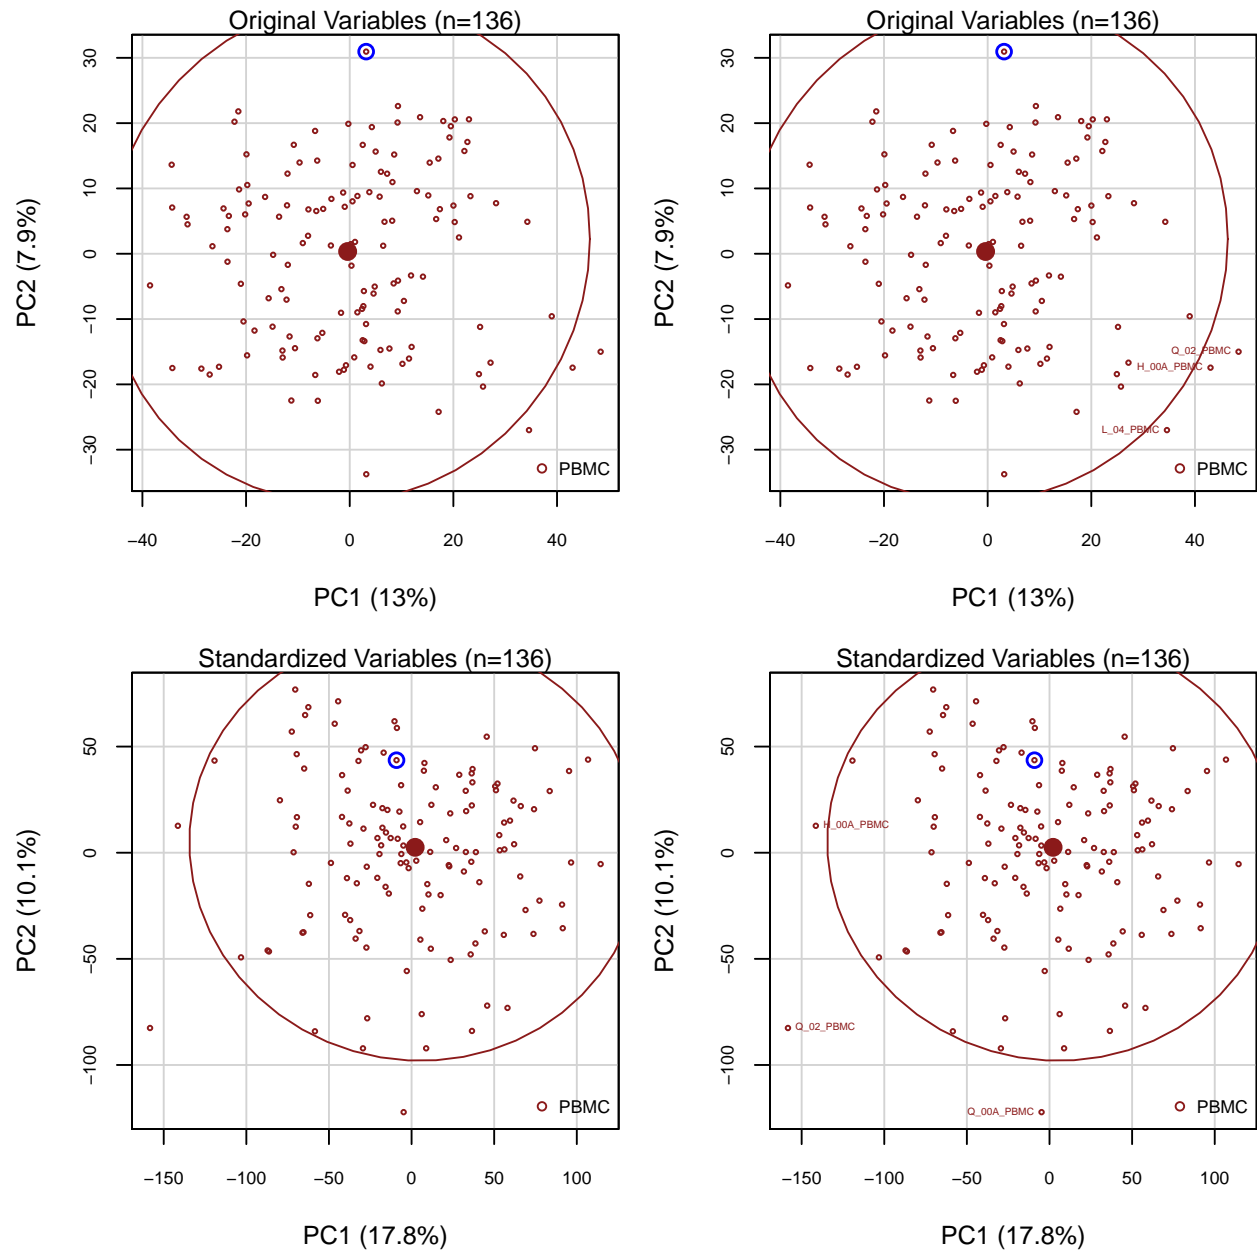

**Figure A8:** PCA biplots (RNA-Seq, PBMC, n=136). The 99% confidence ellipse for the bivariate mean is shown. Identified outliers are highlighted in blue. The right panels are identical to the left panels except that they show dataset labels for the three most distinct samples based on maximum Mahalanobis distance.

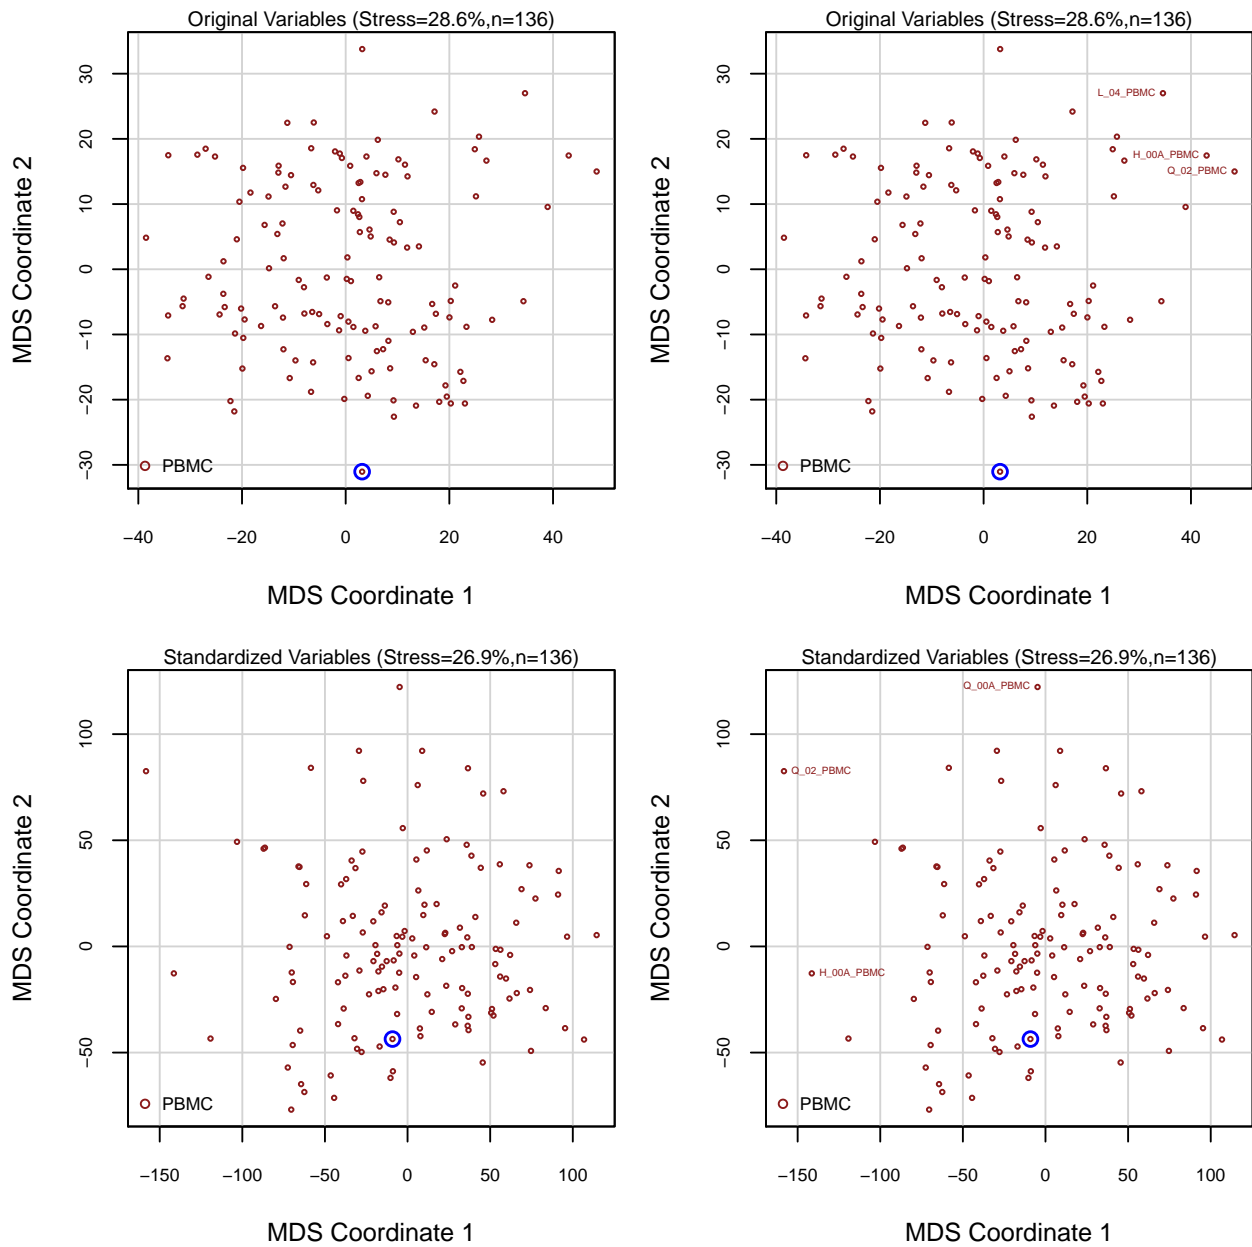

**Figure A9:** Non-metric multidimensional scaling biplots based on Euclidean distance (RNA-Seq, PBMC, n=136). Euclidean distance was used to determine pairwise differences. Identified outliers are highlighted in blue. The right panels are identical to the left panels except that they show dataset labels for the three most distinct samples based on maximum Mahalanobis distance.

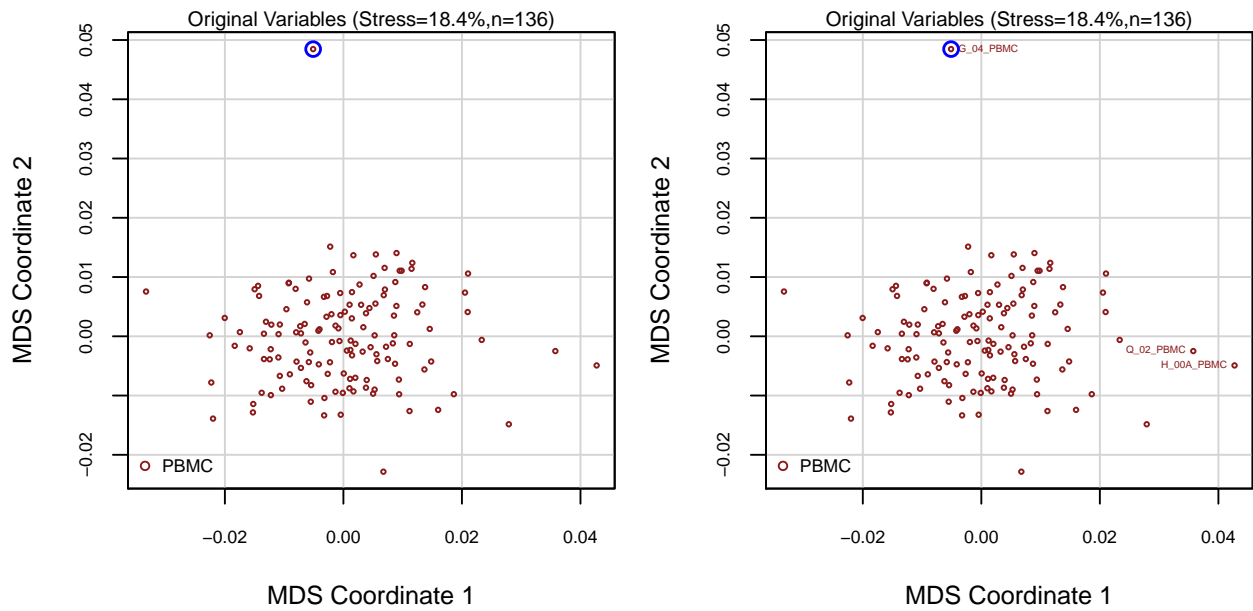

**Figure A10:** Non-metric multidimensional scaling biplots based on Spearman correlation distance (RNA-Seq, PBMC, n=136). Spearman correlation distance was used to determine pairwise differences. Identified outliers are highlighted in blue. The right panels are identical to the left panels except that they show dataset labels for the three most distinct samples based on maximum Mahalanobis distance.

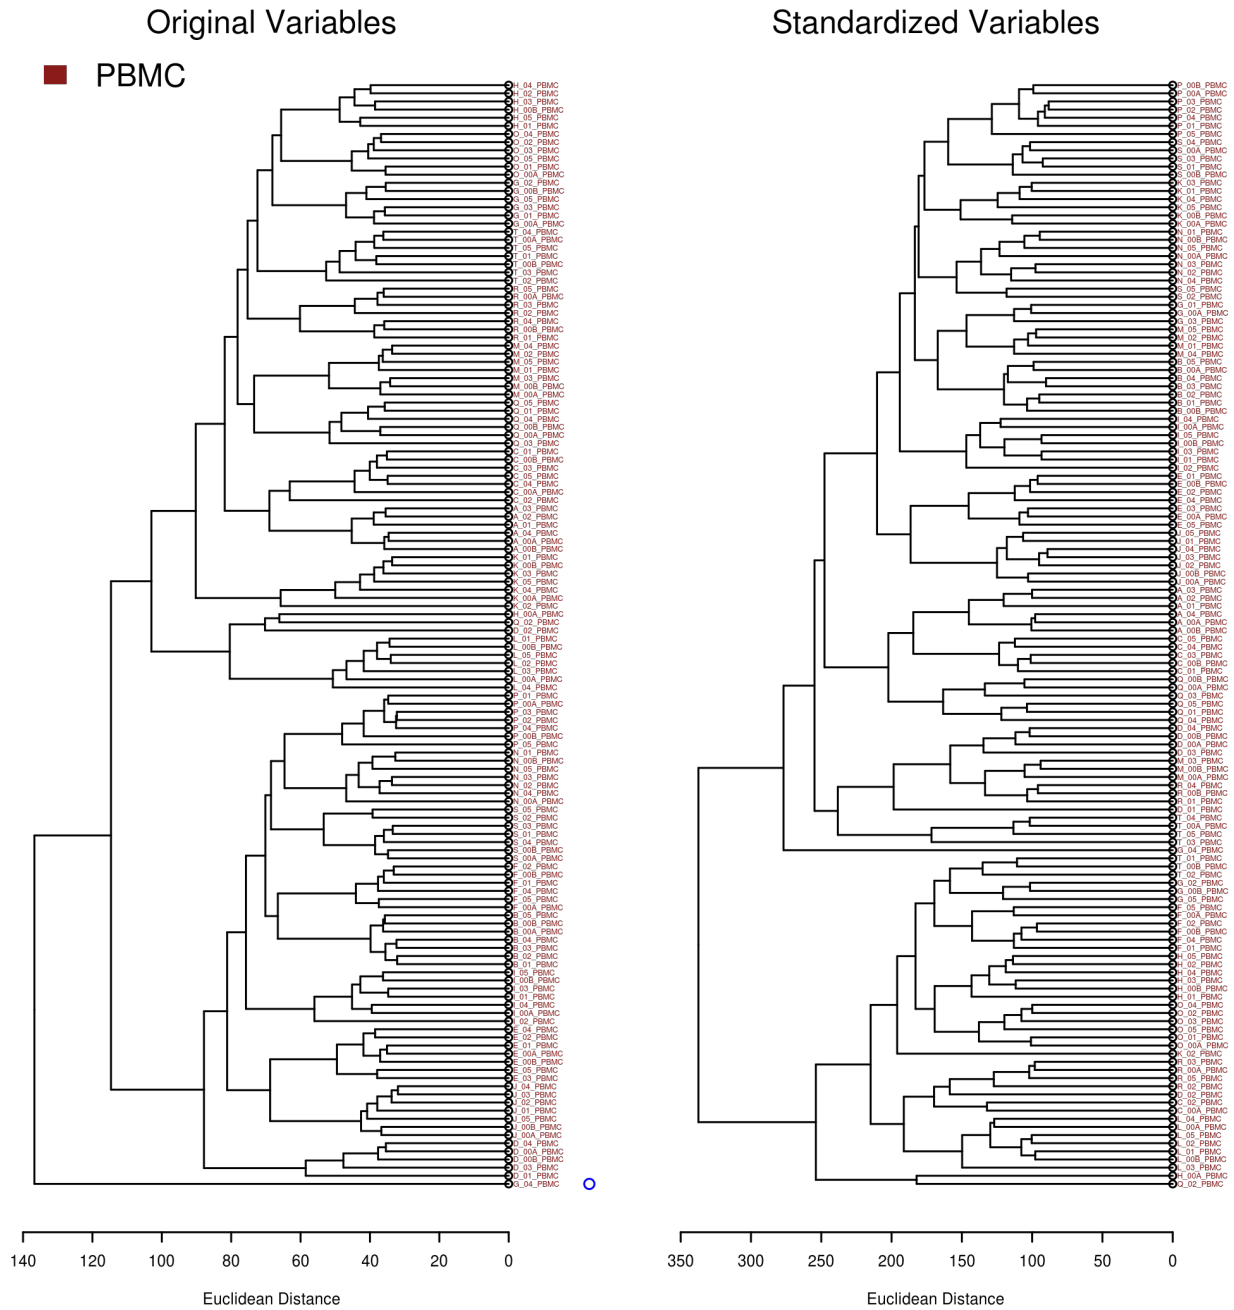

**Figure A11:** Hierarchical Clustering Plots (RNA-Seq, PBMC, n=136). Euclidean distances hierarchically clustered using the complete linkage clustering algorithm. Identified outliers are highlighted in blue.

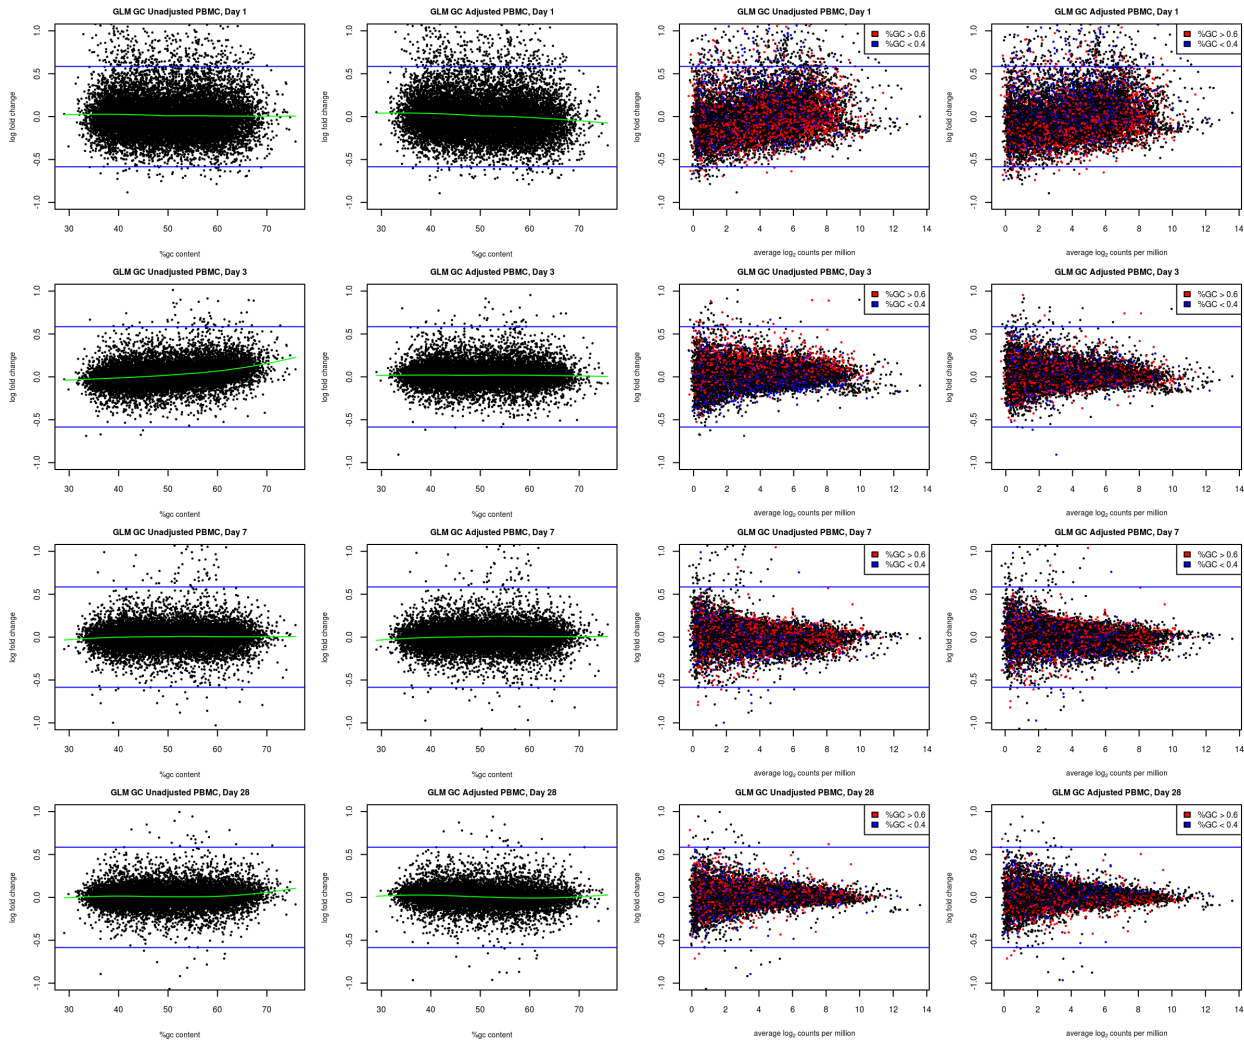

**Figure A12:** Impact of GC on fold change (RNA-Seq, PBMC).

[Panels to the left show the estimated  $\log_2$  fold changes (SV-AS03 adjuvant group vs. unadjuvanted SV-PBS group) plotted against gene-specific %GC content before and after correcting for % sample GC content, respectively. Panels to the right show MA plots with  $\log_2$  fold change plotted against average LCPM with genes colored according to their GC content (in red: >%60) and (in blue: <%40).]



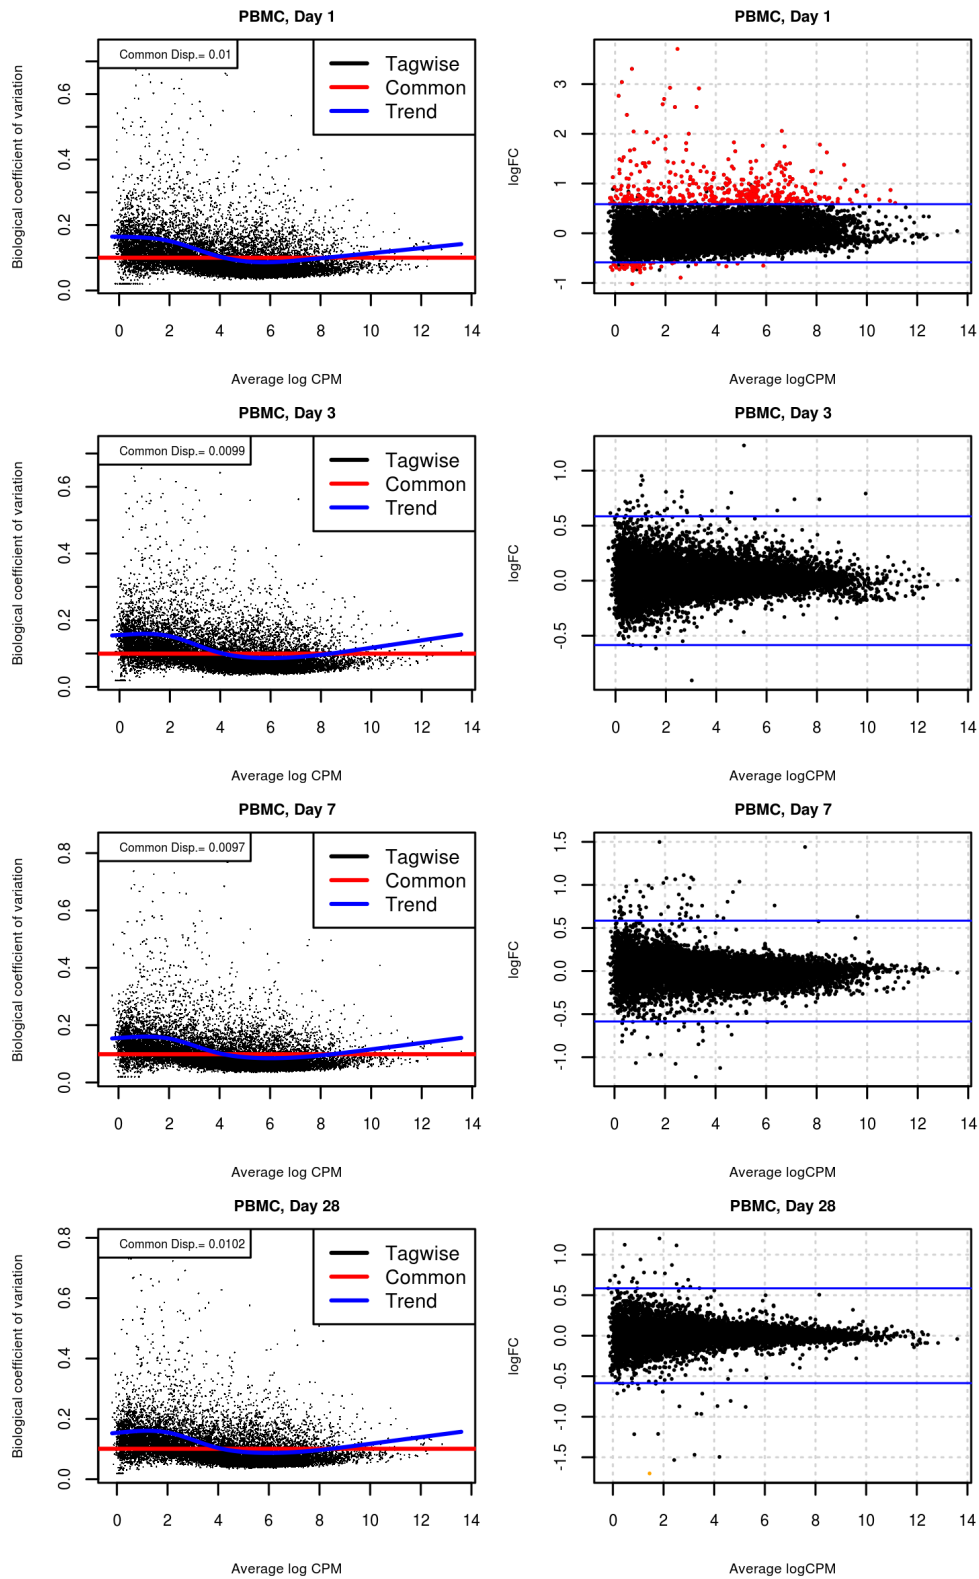

Figure A13: Model QC summary plots (RNA-Seq, PBMC).

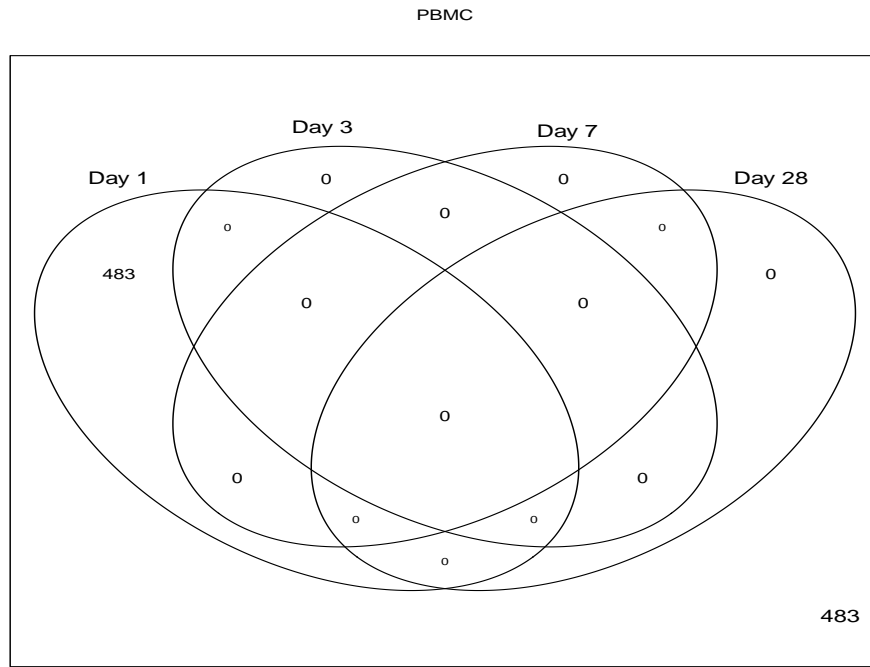

**Figure A14:** Venn diagrams of DE genes by post-vaccination day (RNA-Seq, PBMC, before GC adjustment).

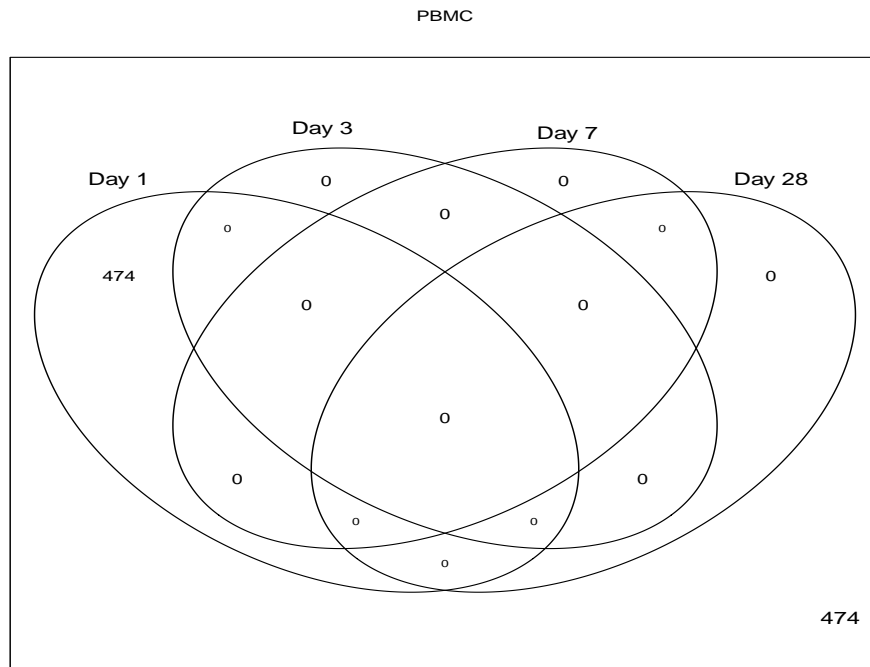

**Figure A15:** Venn diagrams of DE genes by post-vaccination day (RNA-Seq, PBMC, after GC adjustment).

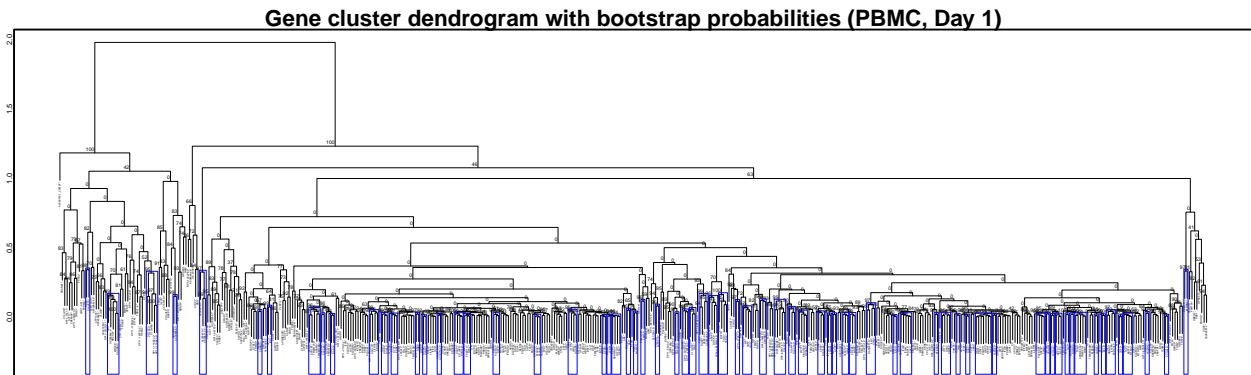

**Figure A16:** Gene cluster dendrogram with bootstrap probabilities (RNA-Seq, PBMC, Day 1). The y axis shows the distance at which clusters were formed by the complete linkage clustering algorithm based on uncentered Pearson correlation distance between  $\log_2$  fold changes. Multiscale bootstrap probabilities are shown at each branch intersection. Significant clusters are highlighted in blue. Asterisks indicate genes that were significantly expressed at a certain day.

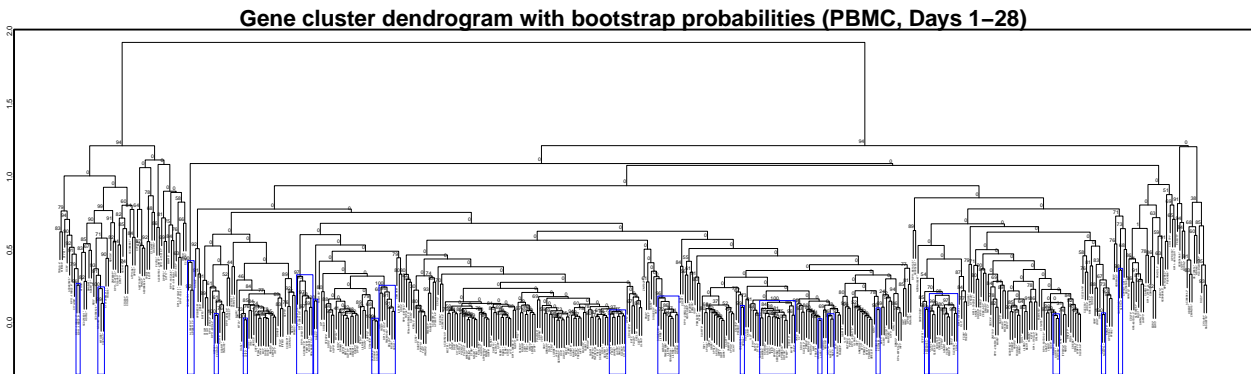

**Figure A17:** Gene cluster dendrogram with bootstrap probabilities (RNA-Seq, PBMC, Day 1-28). The y axis shows the distance at which clusters were formed by the complete linkage clustering algorithm based on uncentered Pearson correlation distance between  $\log_2$  fold changes. Multiscale bootstrap probabilities are shown at each branch intersection. Significant clusters are highlighted in blue. Asterisks indicate genes that were significantly expressed at a certain day.

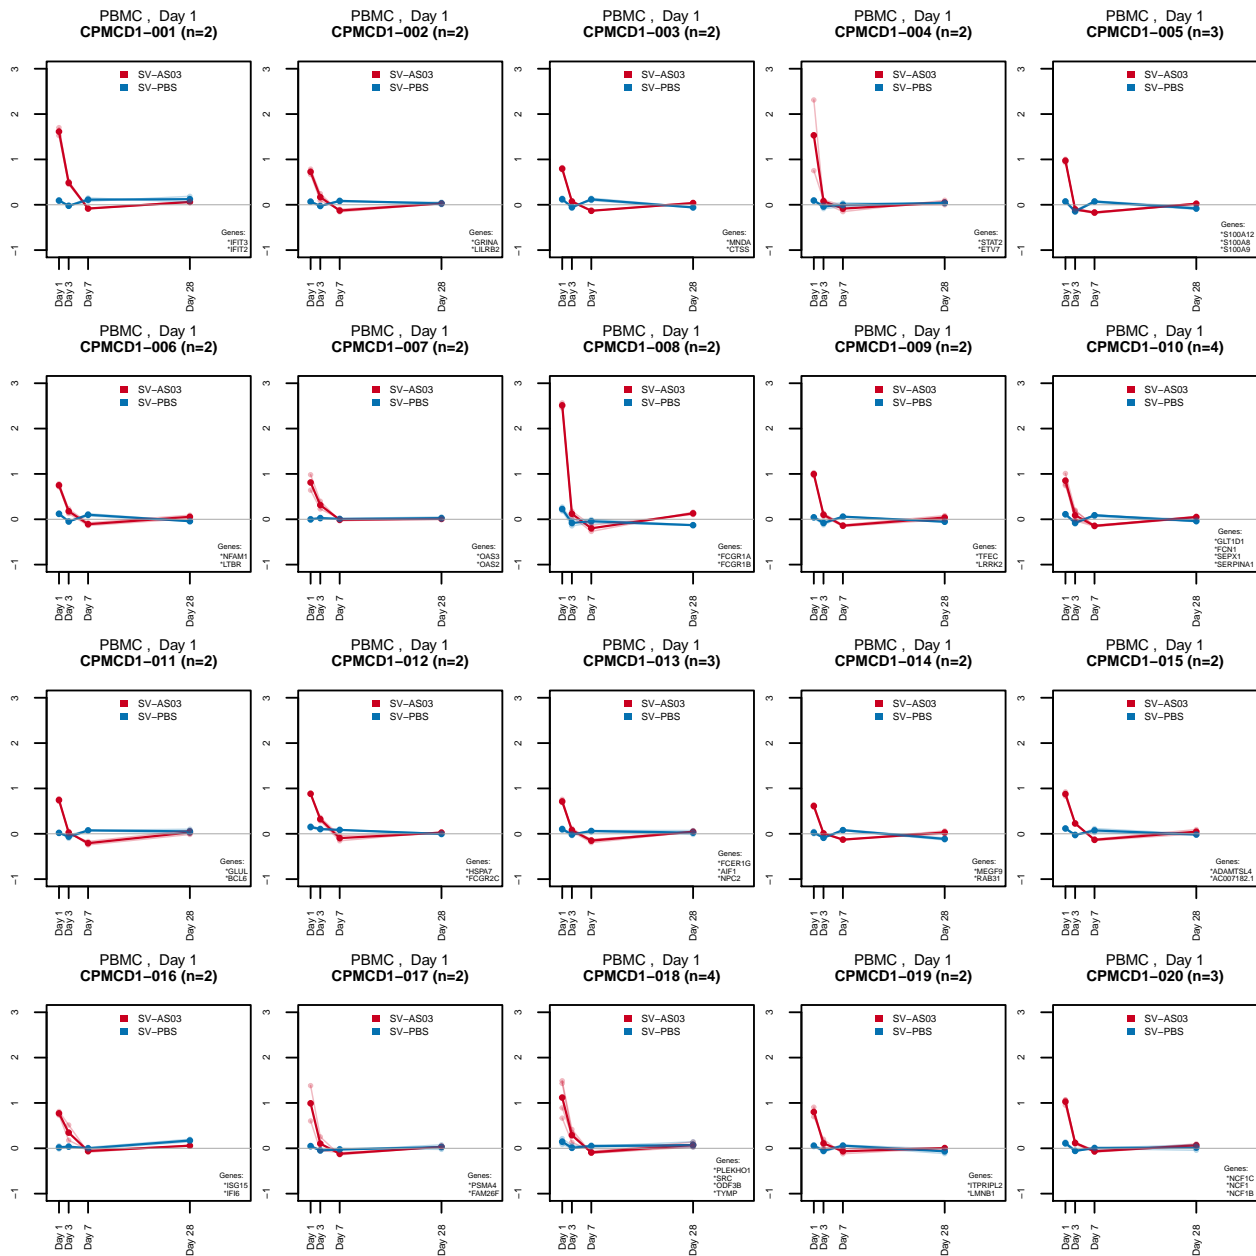

**Figure A18:** Gene cluster time trends of baseline  $\log_2$  fold change by treatment (RNA-Seq, PBMC). Header indicates cluster ID. Mean  $\log_2$  fold change across cluster genes is drawn in bold. Individual mean gene  $\log_2$  fold changes are plotted in lighter colors. Asterisks indicate significantly differentially expressed genes for a given day.

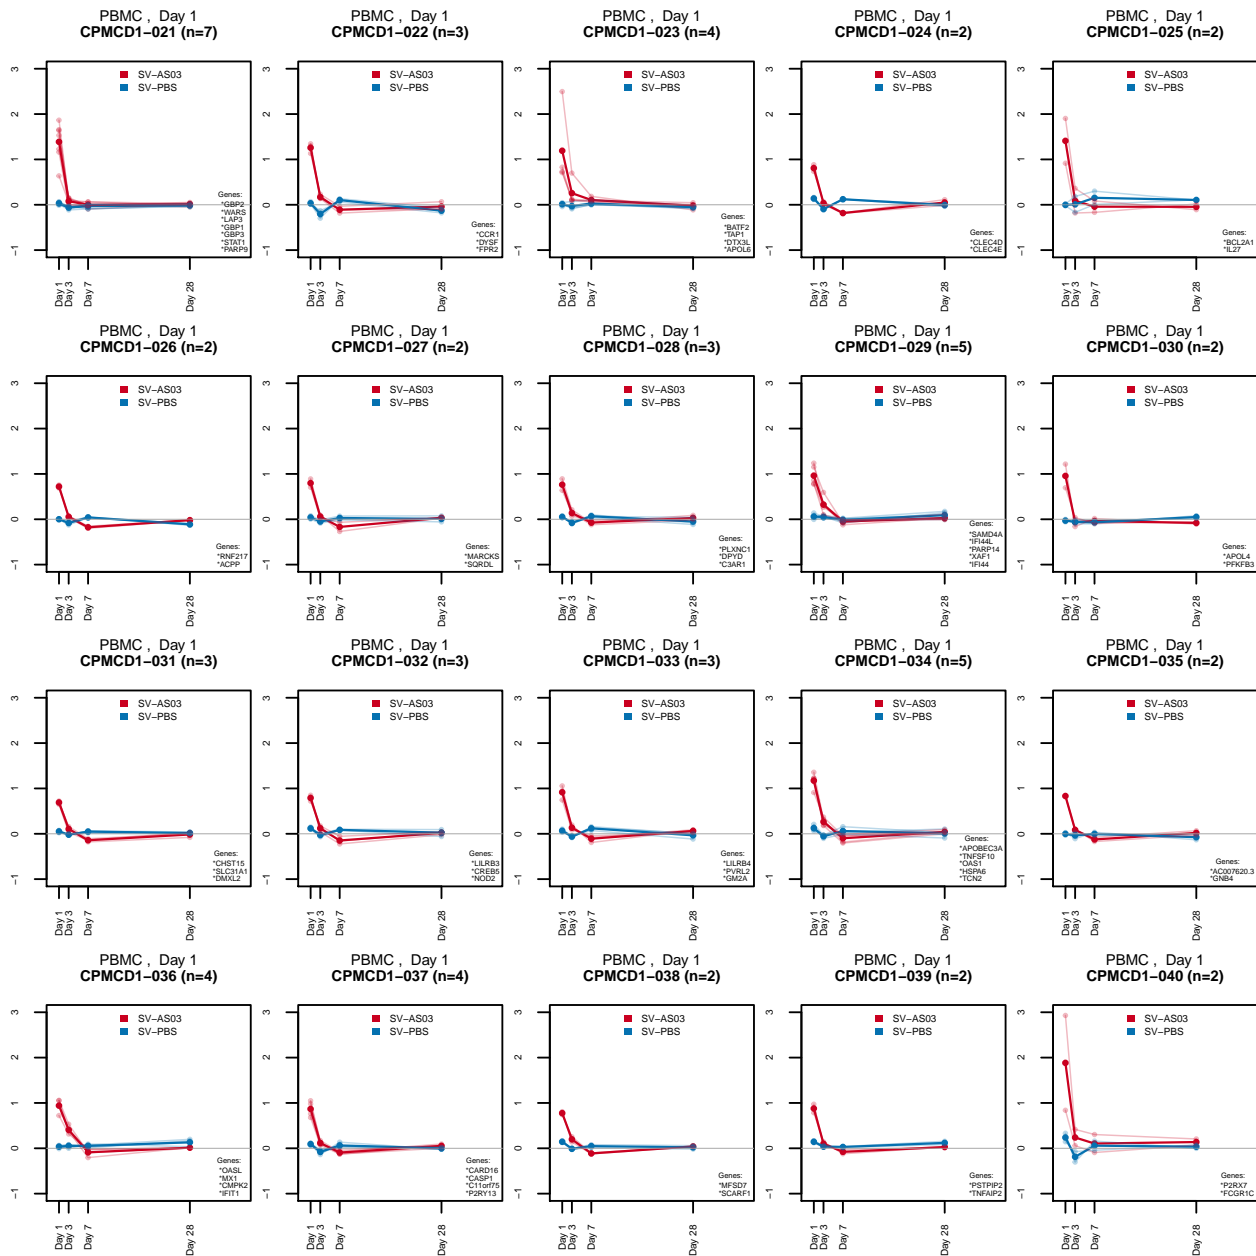

**Figure A19:** Gene cluster time trends of baseline  $\log_2$  fold change by treatment (RNA-Seq, PBMC). Header indicates cluster ID. Mean  $\log_2$  fold change across cluster genes is drawn in bold. Individual mean gene  $\log_2$  fold changes are plotted in lighter colors. Asterisks indicate significantly differentially expressed genes for a given day.

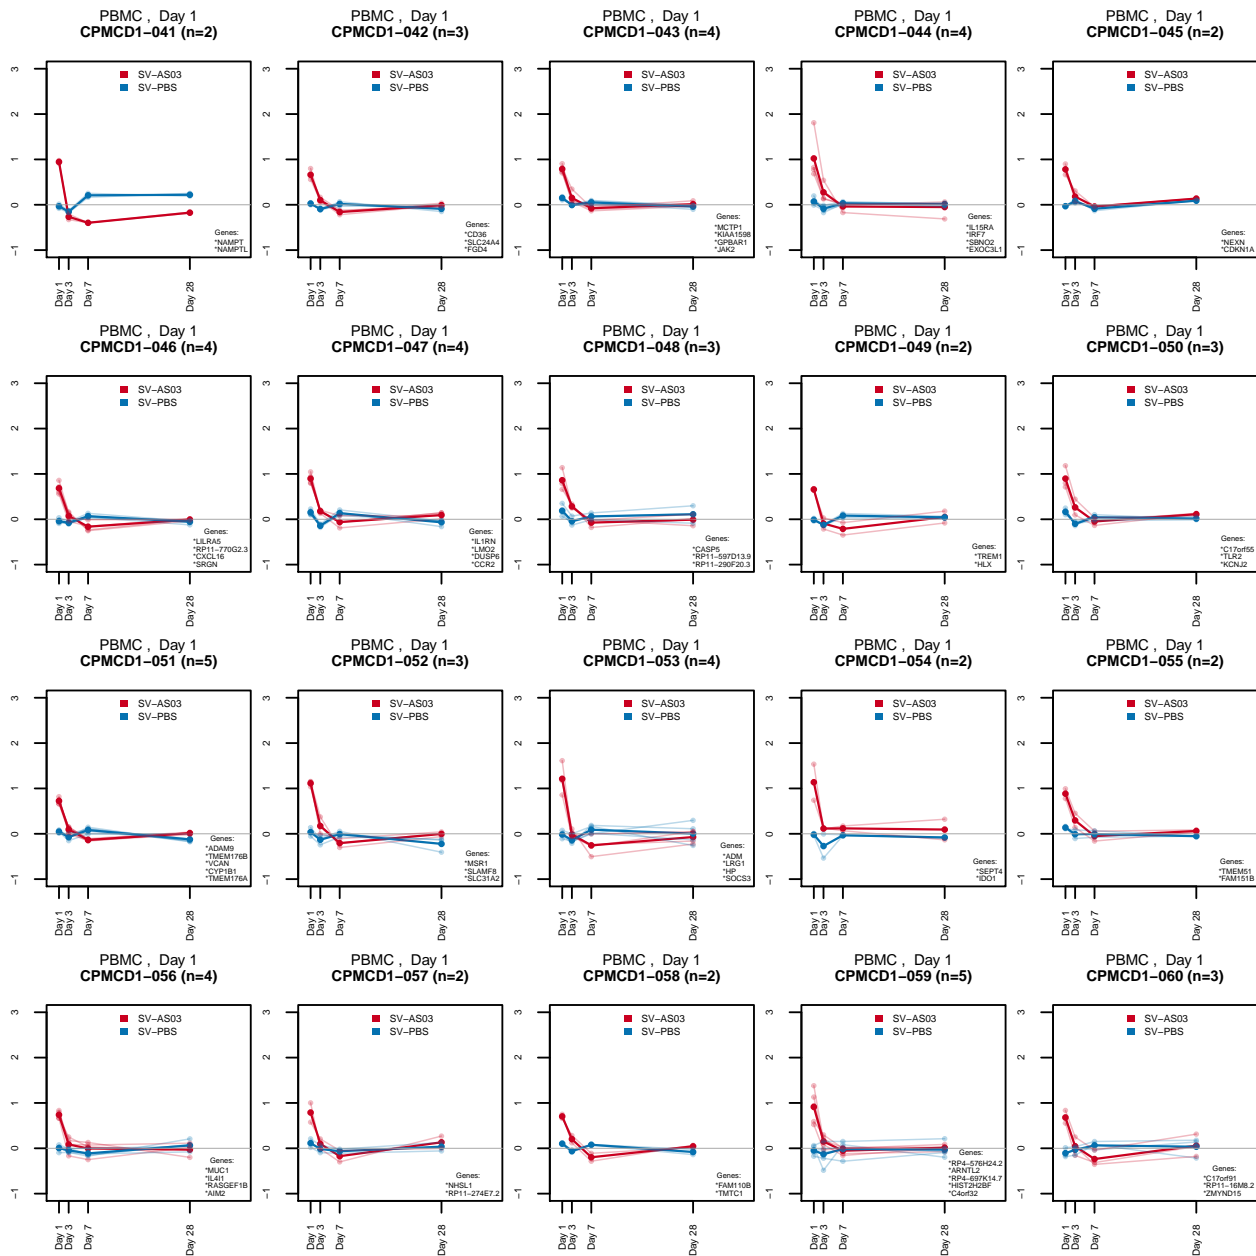

**Figure A20:** Gene cluster time trends of baseline  $\log_2$  fold change by treatment (RNA-Seq, PBMC). Header indicates cluster ID. Mean  $\log_2$  fold change across cluster genes is drawn in bold. Individual mean gene  $\log_2$  fold changes are plotted in lighter colors. Asterisks indicate significantly differentially expressed genes for a given day.

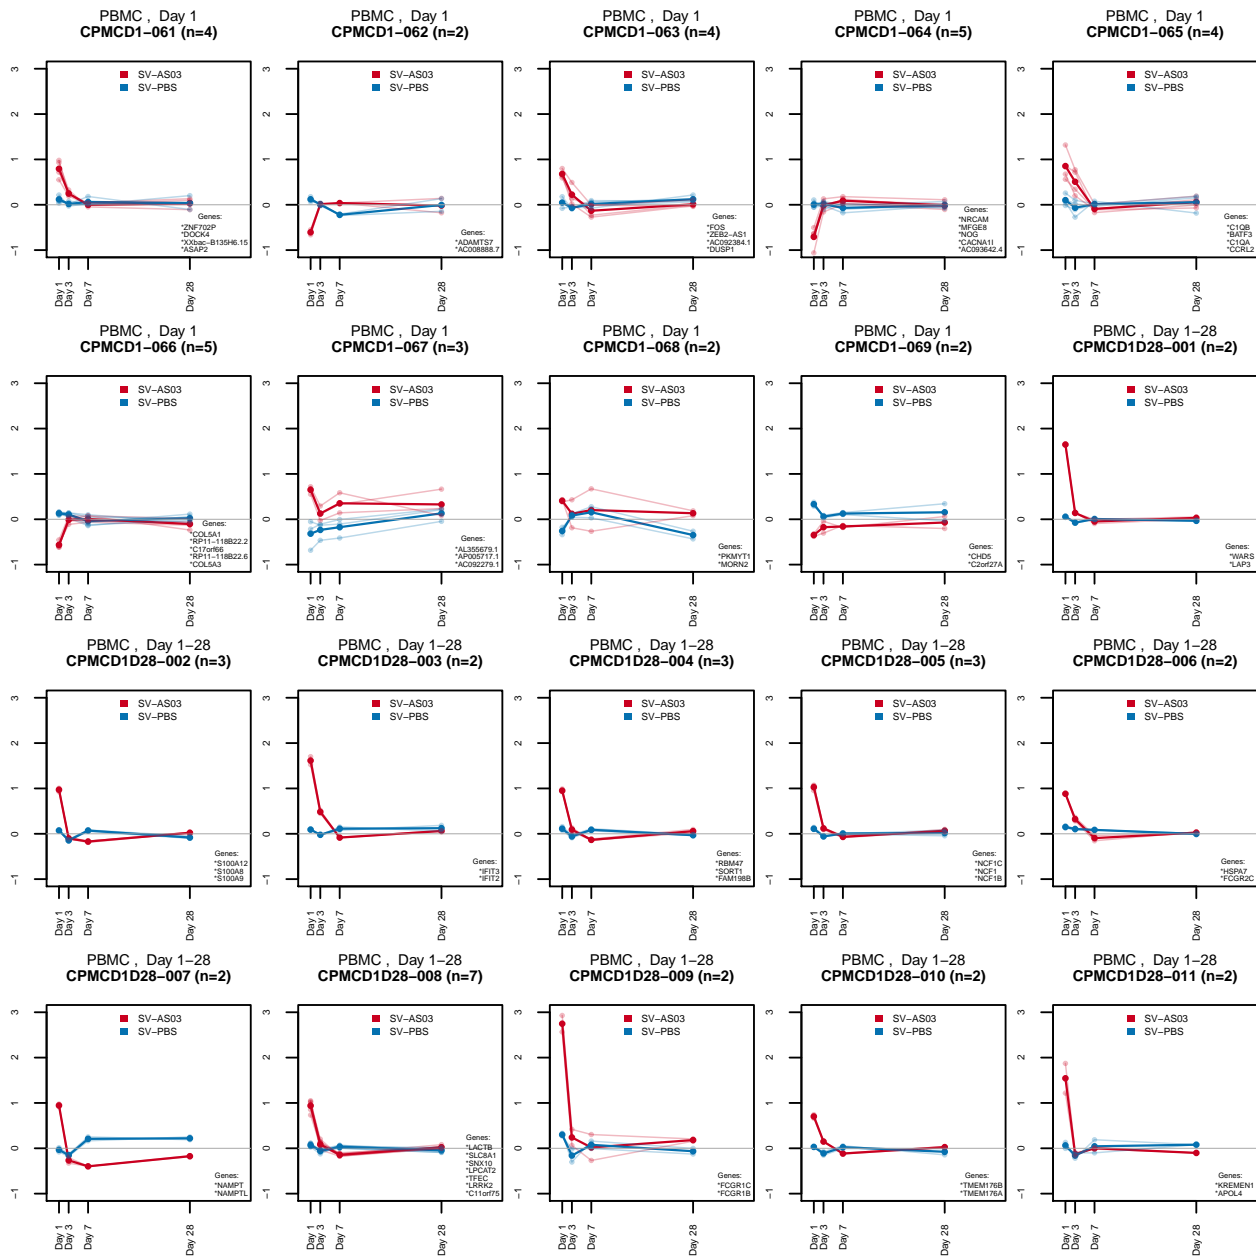

**Figure A21:** Gene cluster time trends of baseline  $\log_2$  fold change by treatment (RNA-Seq, PBMC). Header indicates cluster ID. Mean  $\log_2$  fold change across cluster genes is drawn in bold. Individual mean gene  $\log_2$  fold changes are plotted in lighter colors. Asterisks indicate significantly differentially expressed genes for a given day.

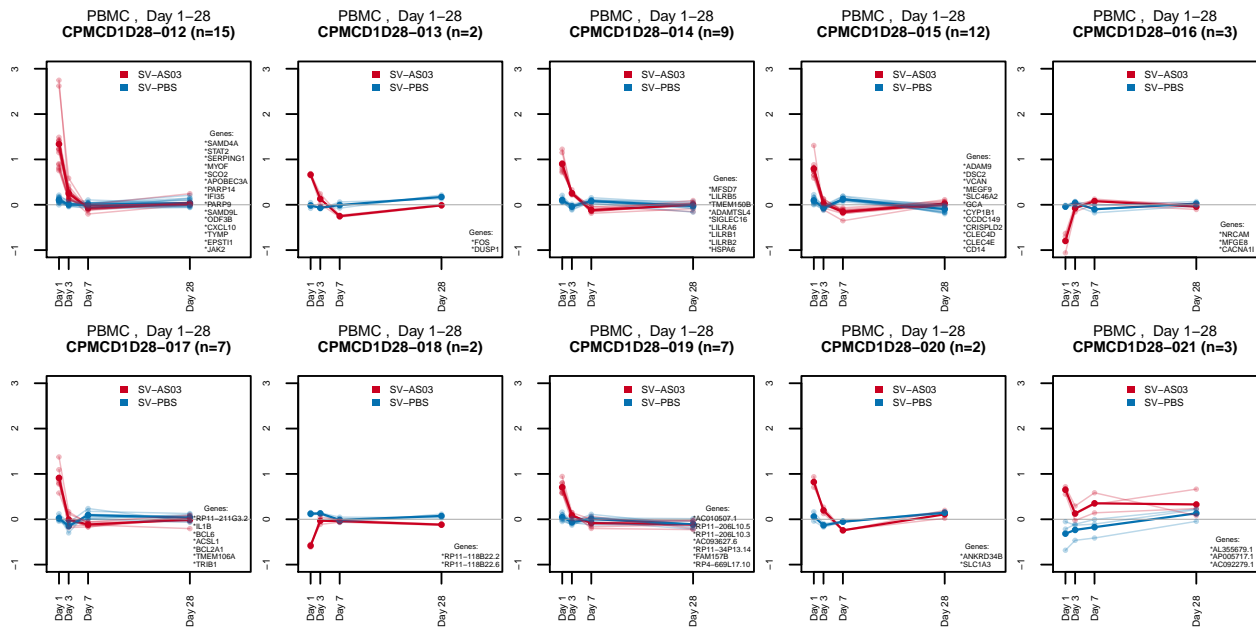

**Figure A22:** Gene cluster time trends of baseline  $\log_2$  fold change by treatment (RNA-Seq, PBMC). Header indicates cluster ID. Mean  $\log_2$  fold change across cluster genes is drawn in bold. Individual mean gene  $\log_2$  fold changes are plotted in lighter colors. Asterisks indicate significantly differentially expressed genes for a given day.







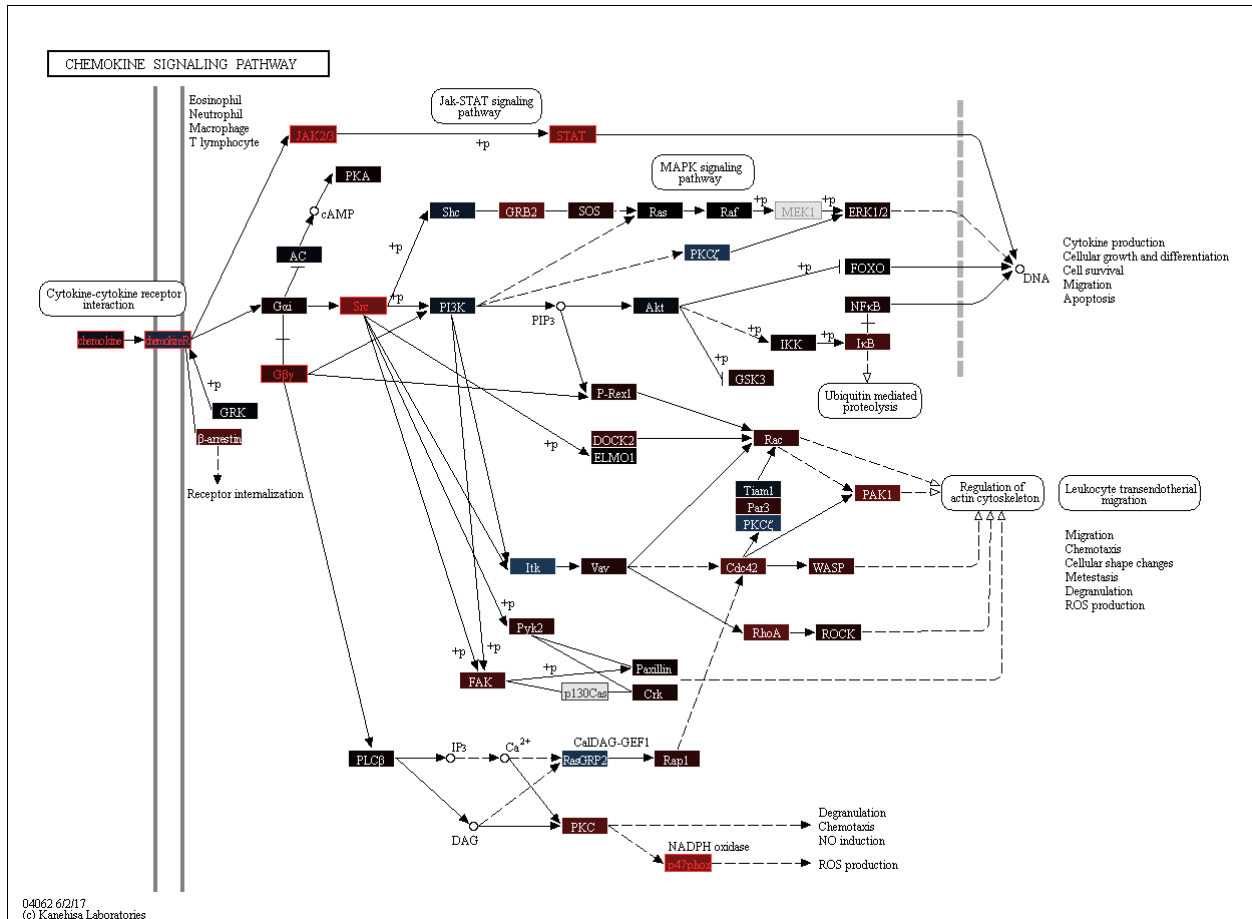

**Figure A25:** KEGG Pathway Map - Chemokine signaling pathway (RNA-Seq, PBMC, Day 1). Node color gradient encodes mean  $\log_2$  fold change difference between treatment groups (for multi-gene nodes the median fold change is used). In red: up-regulated for the SV-AS03 group compared to the SV-PBS group, in blue: down-regulated for the SV-AS03 group compared to the SV-PBS group, in black: fold change close to 1, in dark grey: genes filtered out due to low overall expression, light grey: gene missing database mapping, white: non-human gene. DE genes are highlighted using red (significantly up-regulated in the SV-AS03 group compared to the SV-PBS group) and blue (significantly down-regulated in the SV-AS03 group compared to the SV-PBS group) node label and border colors.



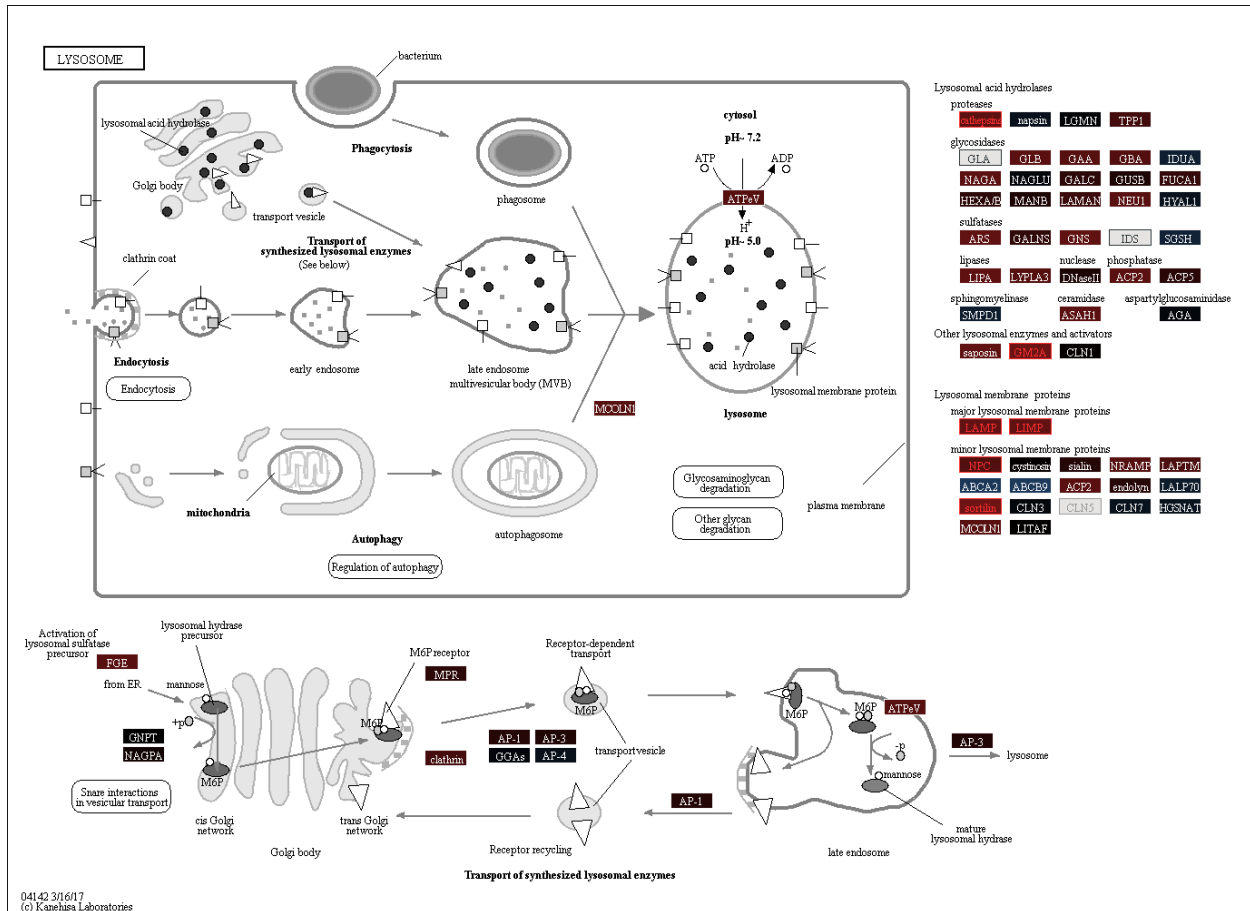

**Figure A27:** KEGG Pathway Map - Lysosome (RNA-Seq, PBMC, Day 1). Node color gradient encodes mean  $\log_2$  fold change difference between treatment groups (for multi-gene nodes the median fold change is used). In red: up-regulated for the SV-AS03 group compared to the SV-PBS group, in blue: down-regulated for the SV-AS03 group compared to the SV-PBS group, in black: fold change close to 1, in dark grey: genes filtered out due to low overall expression, light grey: gene missing database mapping, white: non-human gene. DE genes are highlighted using red (significantly up-regulated in the SV-AS03 group compared to the SV-PBS group) and blue (significantly down-regulated in the SV-AS03 group compared to the SV-PBS group) node label and border colors.

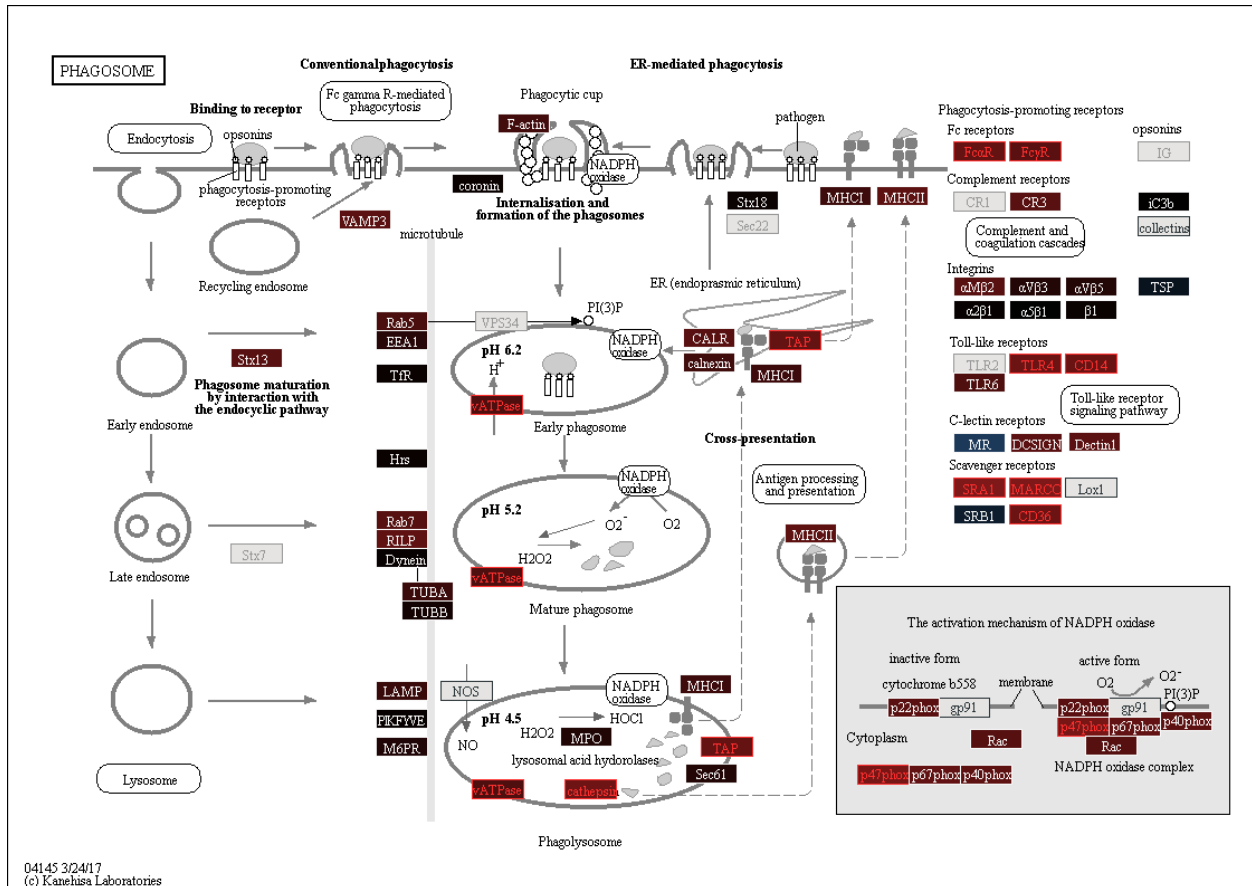

**Figure A28:** KEGG Pathway Map - Phagosome (RNA-Seq, PBMC, Day 1). Node color gradient encodes mean  $\log_2$  fold change difference between treatment groups (for multi-gene nodes the median fold change is used). In red: up-regulated for the SV-AS03 group compared to the SV-PBS group, in blue: down-regulated for the SV-AS03 group compared to the SV-PBS group, in black: fold change close to 1, in dark grey: genes filtered out due to low overall expression, light grey: gene missing database mapping, white: non-human gene. DE genes are highlighted using red (significantly up-regulated in the SV-AS03 group compared to the SV-PBS group) and blue (significantly down-regulated in the SV-AS03 group compared to the SV-PBS group) node label and border colors.

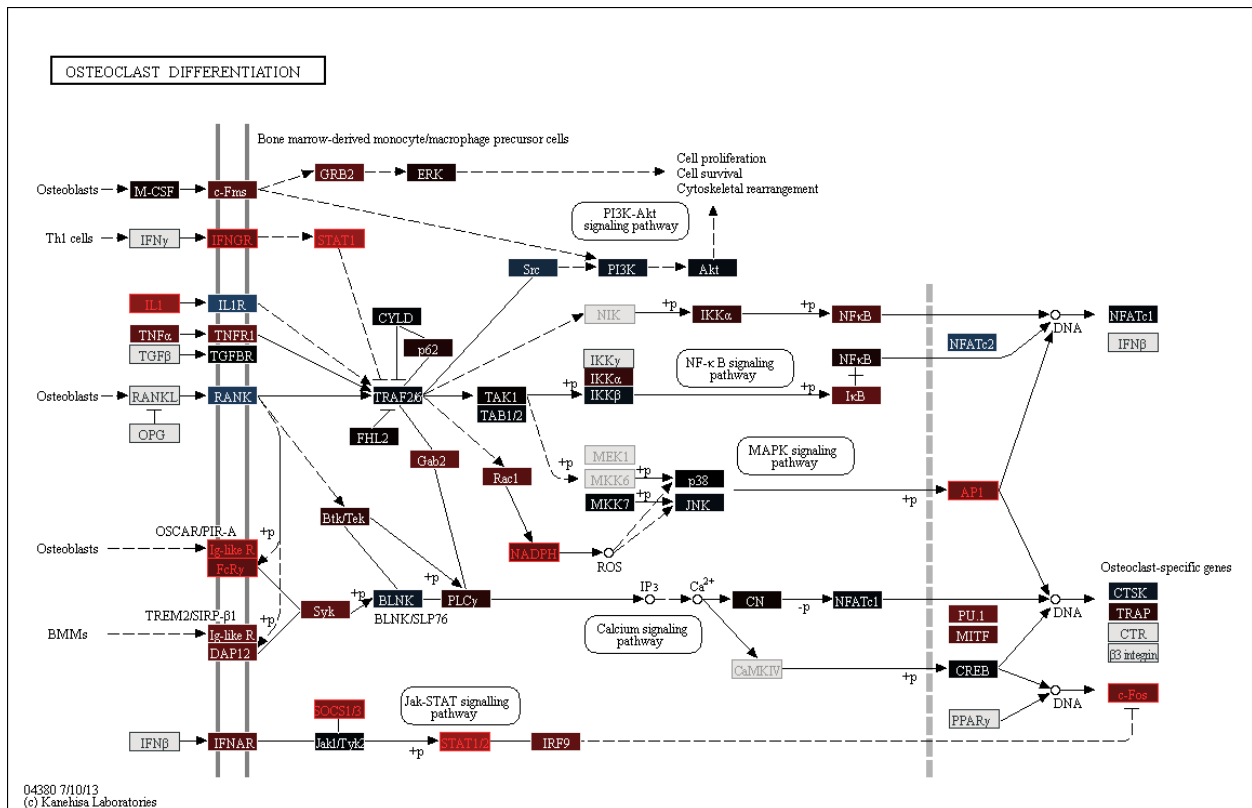

**Figure A29:** KEGG Pathway Map - Osteoclast differentiation (RNA-Seq, PBMC, Day 1). Node color gradient encodes mean  $\log_2$  fold change difference between treatment groups (for multi-gene nodes the median fold change is used). In red: up-regulated for the SV-AS03 group compared to the SV-PBS group, in blue: down-regulated for the SV-AS03 group compared to the SV-PBS group, in black: fold change close to 1, in dark grey: genes filtered out due to low overall expression, light grey: gene missing database mapping, white: non-human gene. DE genes are highlighted using red (significantly up-regulated in the SV-AS03 group compared to the SV-PBS group) and blue (significantly down-regulated in the SV-AS03 group compared to the SV-PBS group) node label and border colors.





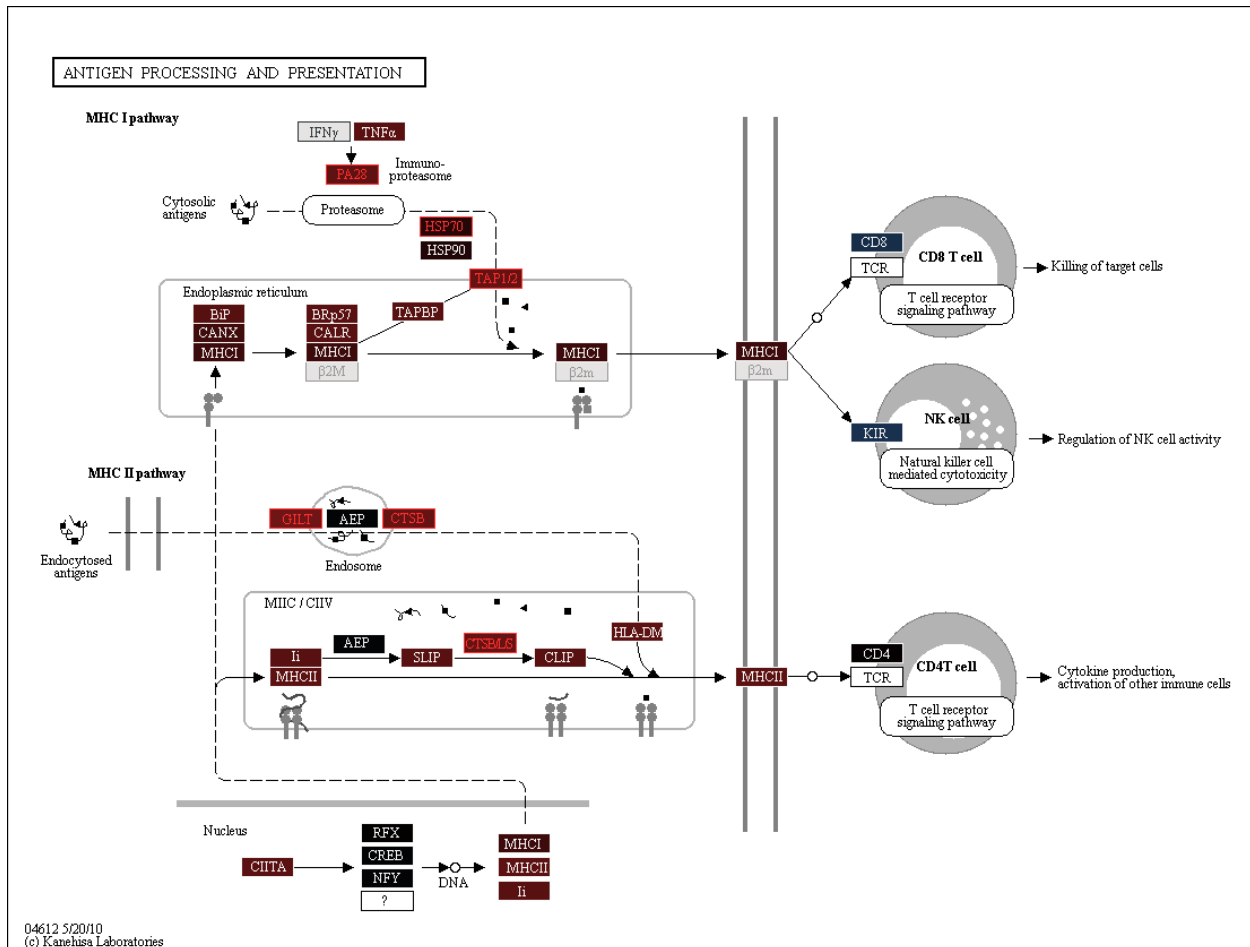

**Figure A31:** KEGG Pathway Map - Antigen processing and presentation (RNA-Seq, PBMC, Day 1). Node color gradient encodes mean  $\log_2$  fold change difference between treatment groups (for multi-gene nodes the median fold change is used). In red: up-regulated for the SV-AS03 group compared to the SV-PBS group, in blue: down-regulated for the SV-AS03 group compared to the SV-PBS group, in black: fold change close to 1, in dark grey: genes filtered out due to low overall expression, light grey: gene missing database mapping, white: non-human gene. DE genes are highlighted using red (significantly up-regulated in the SV-AS03 group compared to the SV-PBS group) and blue (significantly down-regulated in the SV-AS03 group compared to the SV-PBS group) node label and border colors.

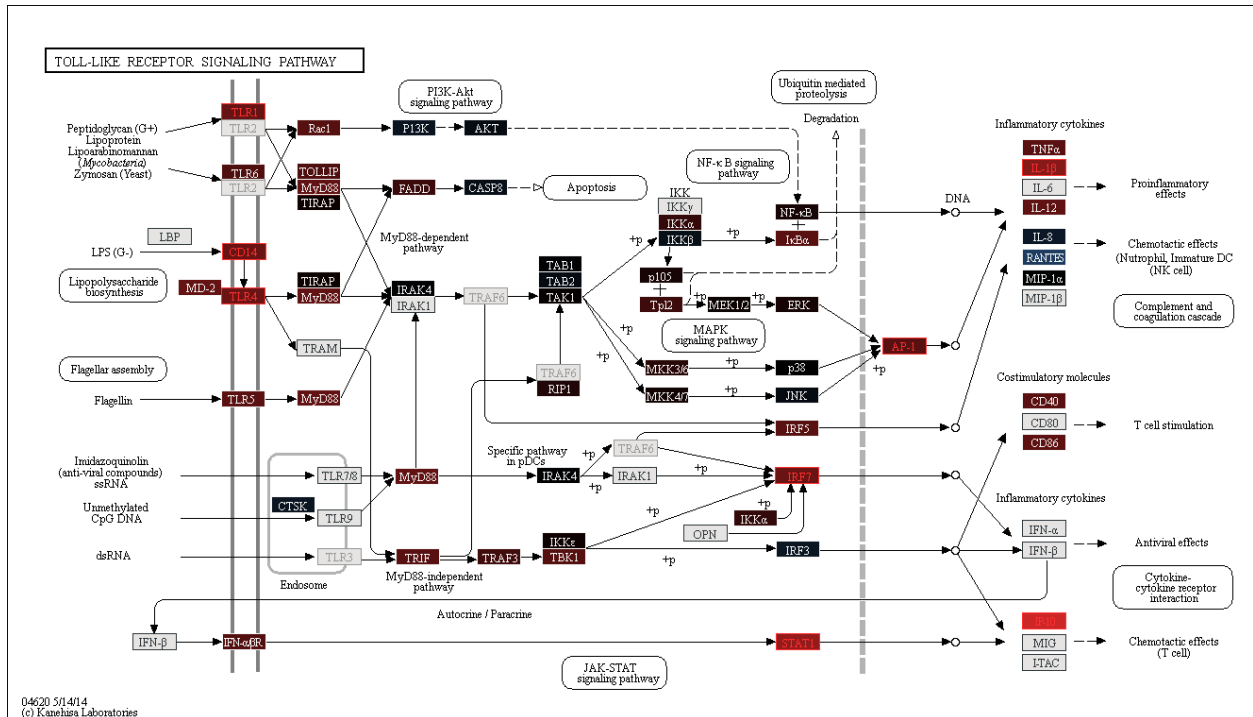

**Figure A32:** KEGG Pathway Map - Toll-like receptor signaling pathway (RNA-Seq, PBMC, Day 1). Node color gradient encodes mean  $\log_2$  fold change difference between treatment groups (for multi-gene nodes the median fold change is used). In red: up-regulated for the SV-AS03 group compared to the SV-PBS group, in blue: down-regulated for the SV-AS03 group compared to the SV-PBS group, in black: fold change close to 1, in dark grey: genes filtered out due to low overall expression, light grey: gene missing database mapping, white: non-human gene. DE genes are highlighted using red (significantly up-regulated in the SV-AS03 group compared to the SV-PBS group) and blue (significantly down-regulated in the SV-AS03 group compared to the SV-PBS group) node label and border colors.

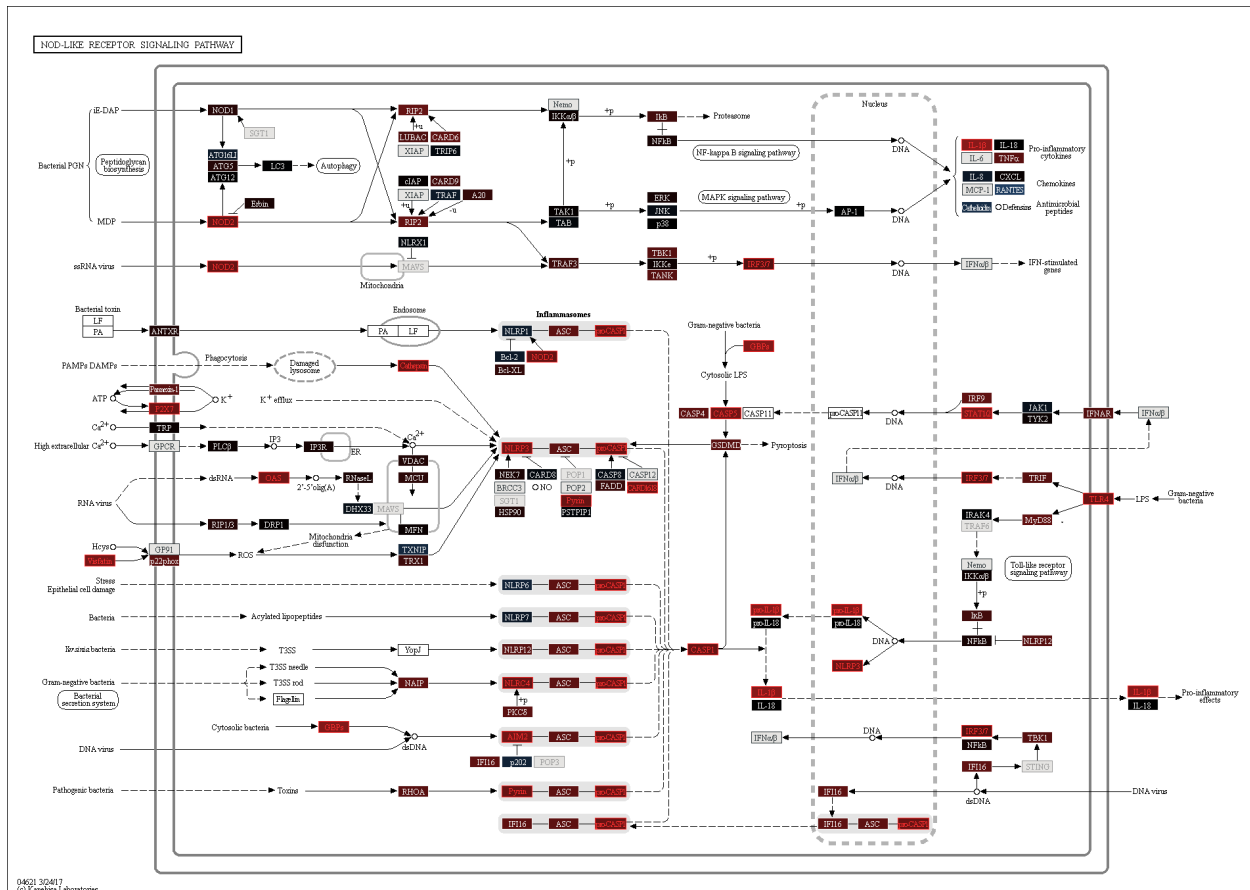

**Figure A33:** KEGG Pathway Map - NOD-like receptor signaling pathway (RNA-Seq, PBMC, Day 1). Node color gradient encodes mean  $\log_2$  fold change difference between treatment groups (for multi-gene nodes the median fold change is used). In red: up-regulated for the SV-AS03 group compared to the SV-PBS group, in blue: down-regulated for the SV-AS03 group compared to the SV-PBS group, in black: fold change close to 1, in dark grey: genes filtered out due to low overall expression, light grey: gene missing database mapping, white: non-human gene. DE genes are highlighted using red (significantly up-regulated in the SV-AS03 group compared to the SV-PBS group) and blue (significantly down-regulated in the SV-AS03 group compared to the SV-PBS group) node label and border colors.

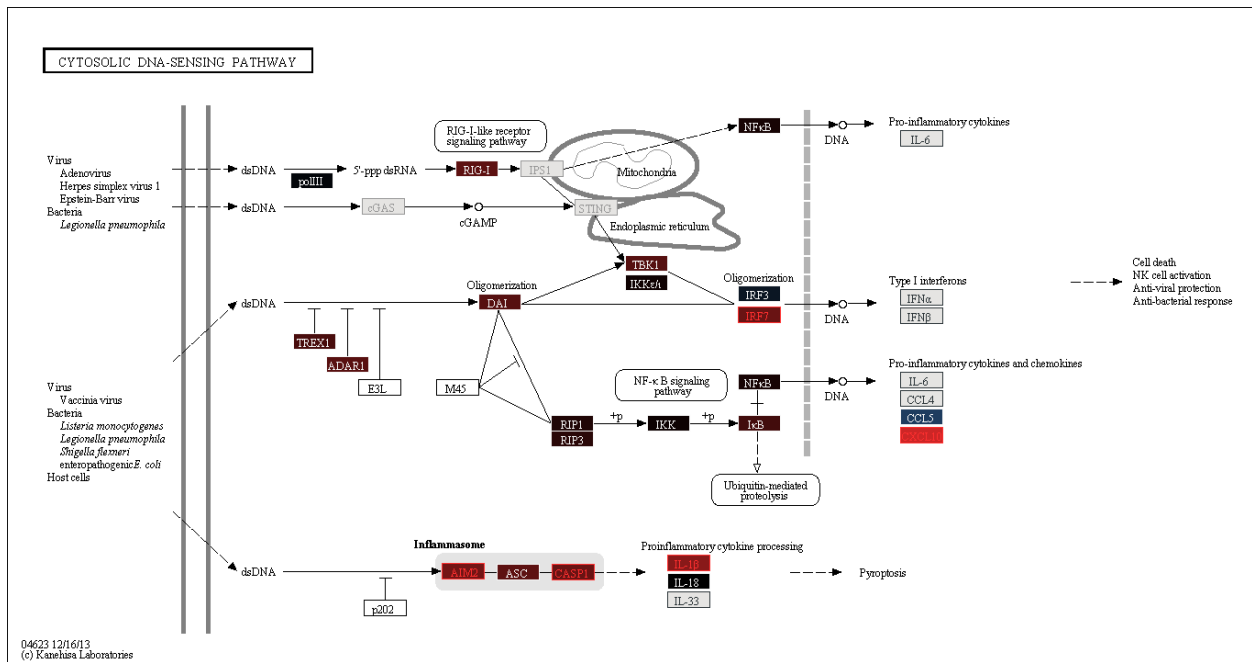

**Figure A34:** KEGG Pathway Map - Cytosolic DNA-sensing pathway (RNA-Seq, PBMC, Day 1). Node color gradient encodes mean  $\log_2$  fold change difference between treatment groups (for multi-gene nodes the median fold change is used). In red: up-regulated for the SV-AS03 group compared to the SV-PBS group, in blue: down-regulated for the SV-AS03 group compared to the SV-PBS group, in black: fold change close to 1, in dark grey: genes filtered out due to low overall expression, light grey: gene missing database mapping, white: non-human gene. DE genes are highlighted using red (significantly up-regulated in the SV-AS03 group compared to the SV-PBS group) and blue (significantly down-regulated in the SV-AS03 group compared to the SV-PBS group) node label and border colors.

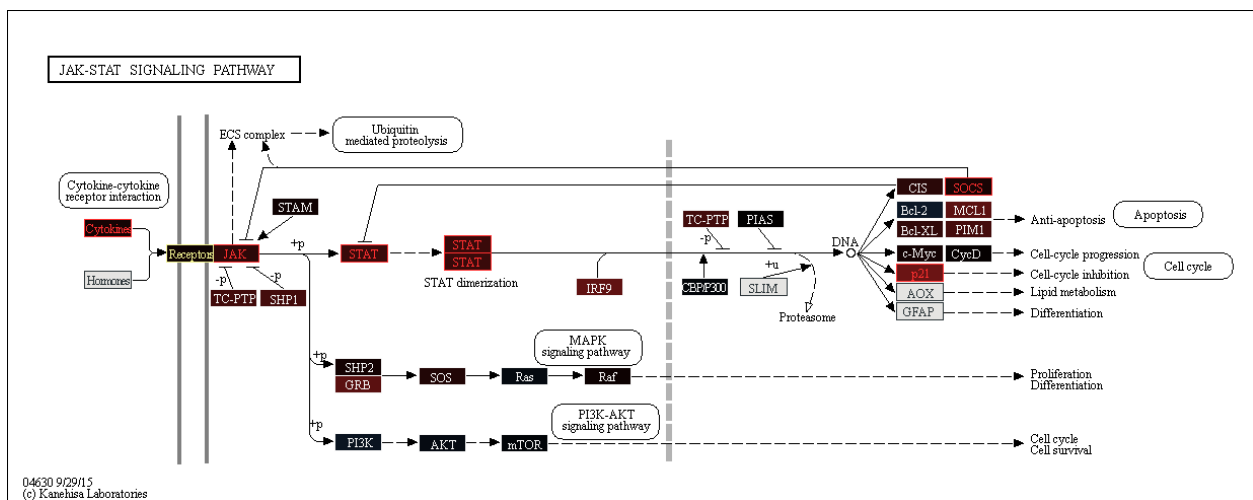

**Figure A35:** KEGG Pathway Map - Jak-STAT signaling pathway (RNA-Seq, PBMC, Day 1). Node color gradient encodes mean  $\log_2$  fold change difference between treatment groups (for multi-gene nodes the median fold change is used). In red: up-regulated for the SV-AS03 group compared to the SV-PBS group, in blue: down-regulated for the SV-AS03 group compared to the SV-PBS group, in black: fold change close to 1, in dark grey: genes filtered out due to low overall expression, light grey: gene missing database mapping, white: non-human gene. DE genes are highlighted using red (significantly up-regulated in the SV-AS03 group compared to the SV-PBS group) and blue (significantly down-regulated in the SV-AS03 group compared to the SV-PBS group) node label and border colors.

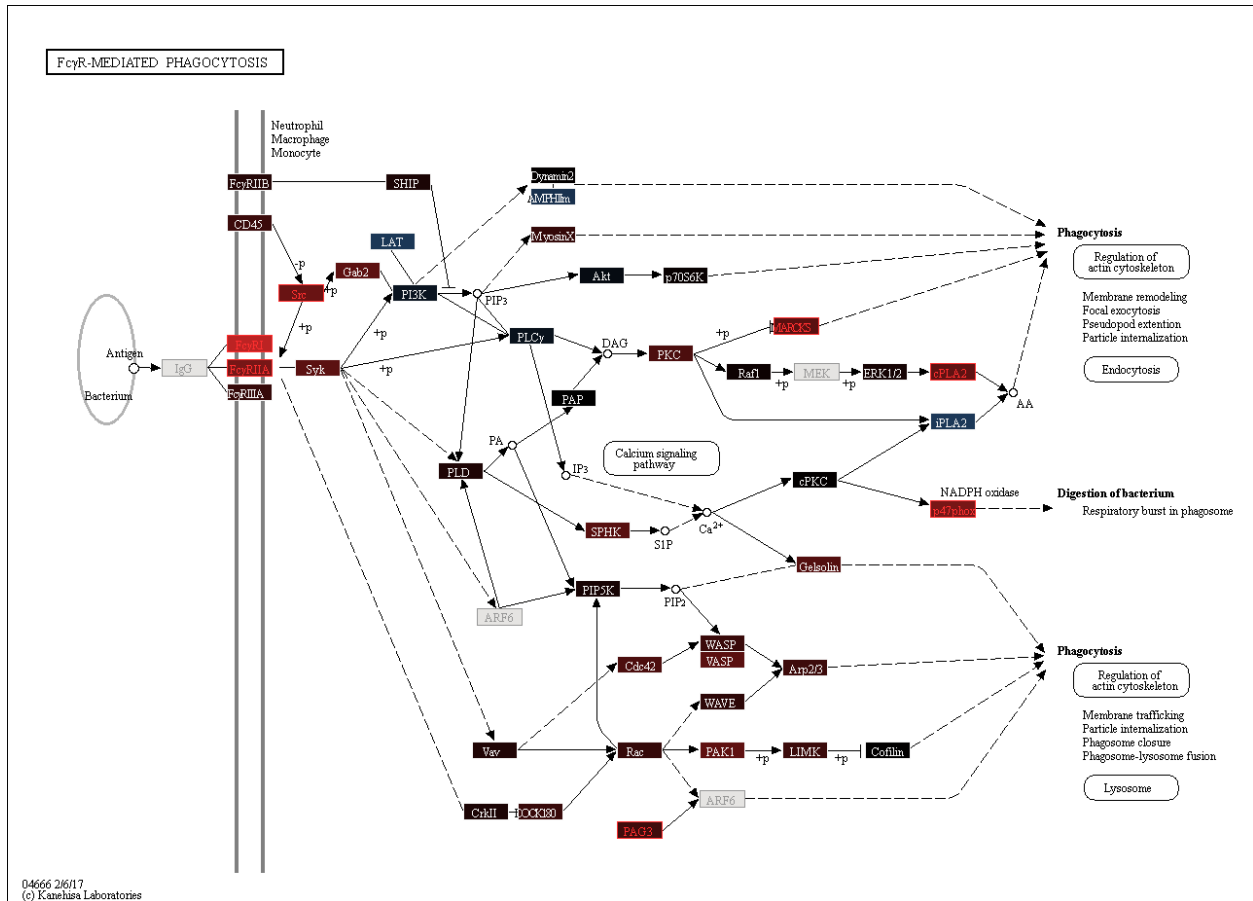

**Figure A36:** KEGG Pathway Map - Fc gamma R-mediated phagocytosis (RNA-Seq, PBMC, Day 1). Node color gradient encodes mean  $\log_2$  fold change difference between treatment groups (for multi-gene nodes the median fold change is used). In red: up-regulated for the SV-AS03 group compared to the SV-PBS group, in blue: down-regulated for the SV-AS03 group compared to the SV-PBS group, in black: fold change close to 1, in dark grey: genes filtered out due to low overall expression, light grey: gene missing database mapping, white: non-human gene. DE genes are highlighted using red (significantly up-regulated in the SV-AS03 group compared to the SV-PBS group) and blue (significantly down-regulated in the SV-AS03 group compared to the SV-PBS group) node label and border colors.

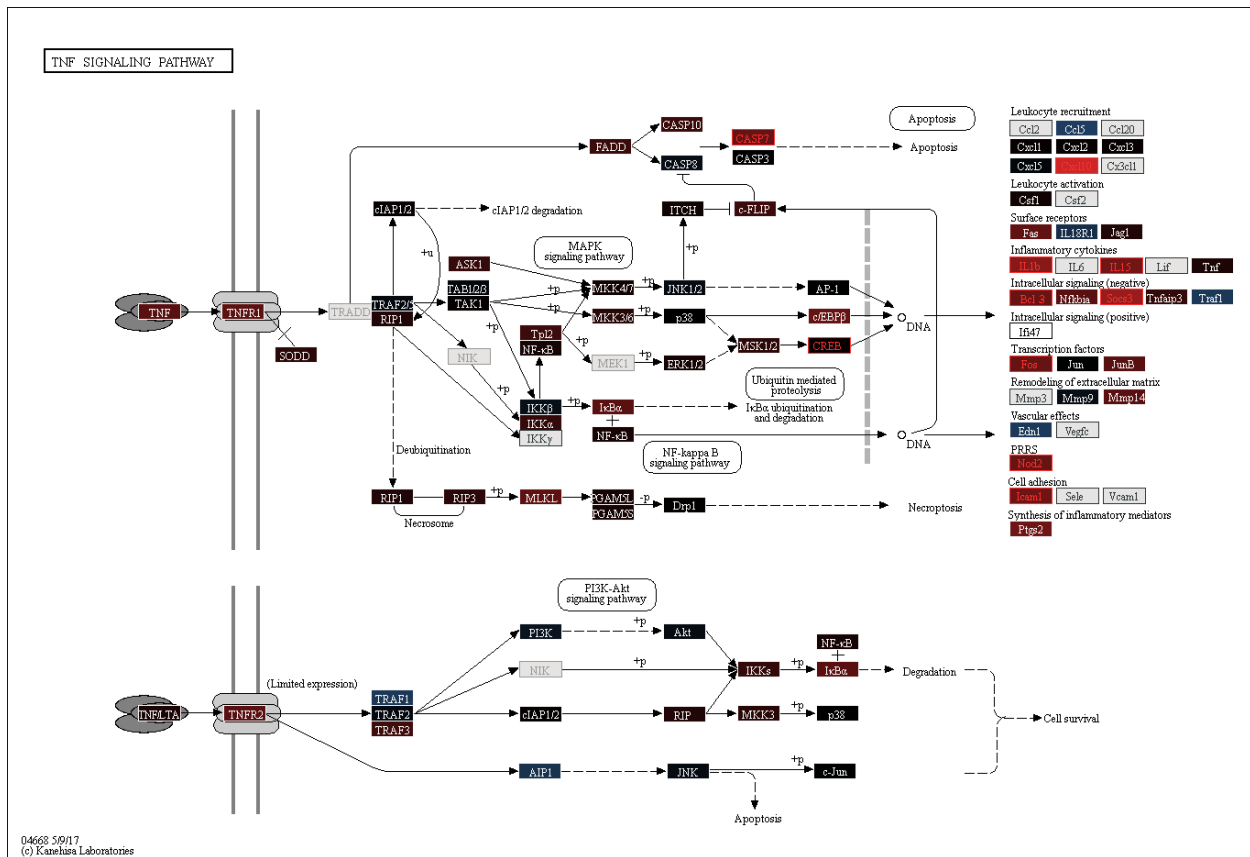

**Figure A37:** KEGG Pathway Map - TNF signaling pathway (RNA-Seq, PBMC, Day 1). Node color gradient encodes mean  $\log_2$  fold change difference between treatment groups (for multi-gene nodes the median fold change is used). In red: up-regulated for the SV-AS03 group compared to the SV-PBS group, in blue: down-regulated for the SV-AS03 group compared to the SV-PBS group, in black: fold change close to 1, in dark grey: genes filtered out due to low overall expression, light grey: gene missing database mapping, white: non-human gene. DE genes are highlighted using red (significantly up-regulated in the SV-AS03 group compared to the SV-PBS group) and blue (significantly down-regulated in the SV-AS03 group compared to the SV-PBS group) node label and border colors.

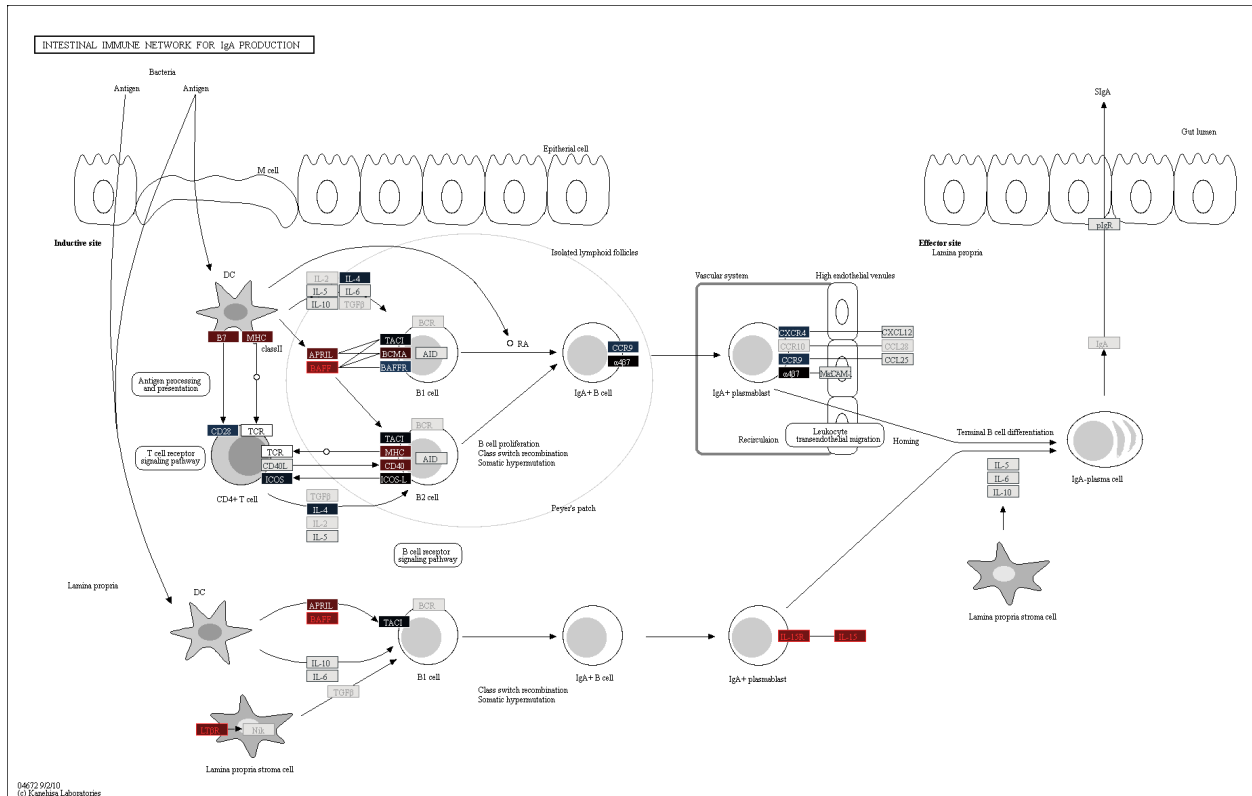

**Figure A38:** KEGG Pathway Map - Intestinal immune network for IgA production (RNA-Seq, PBMC, Day 1). Node color gradient encodes mean  $\log_2$  fold change difference between treatment groups (for multi-gene nodes the median fold change is used). In red: up-regulated for the SV-AS03 group compared to the SV-PBS group, in blue: down-regulated for the SV-AS03 group compared to the SV-PBS group, in black: fold change close to 1, in dark grey: genes filtered out due to low overall expression, light grey: gene missing database mapping, white: non-human gene. DE genes are highlighted using red (significantly up-regulated in the SV-AS03 group compared to the SV-PBS group) and blue (significantly down-regulated in the SV-AS03 group compared to the SV-PBS group) node label and border colors.





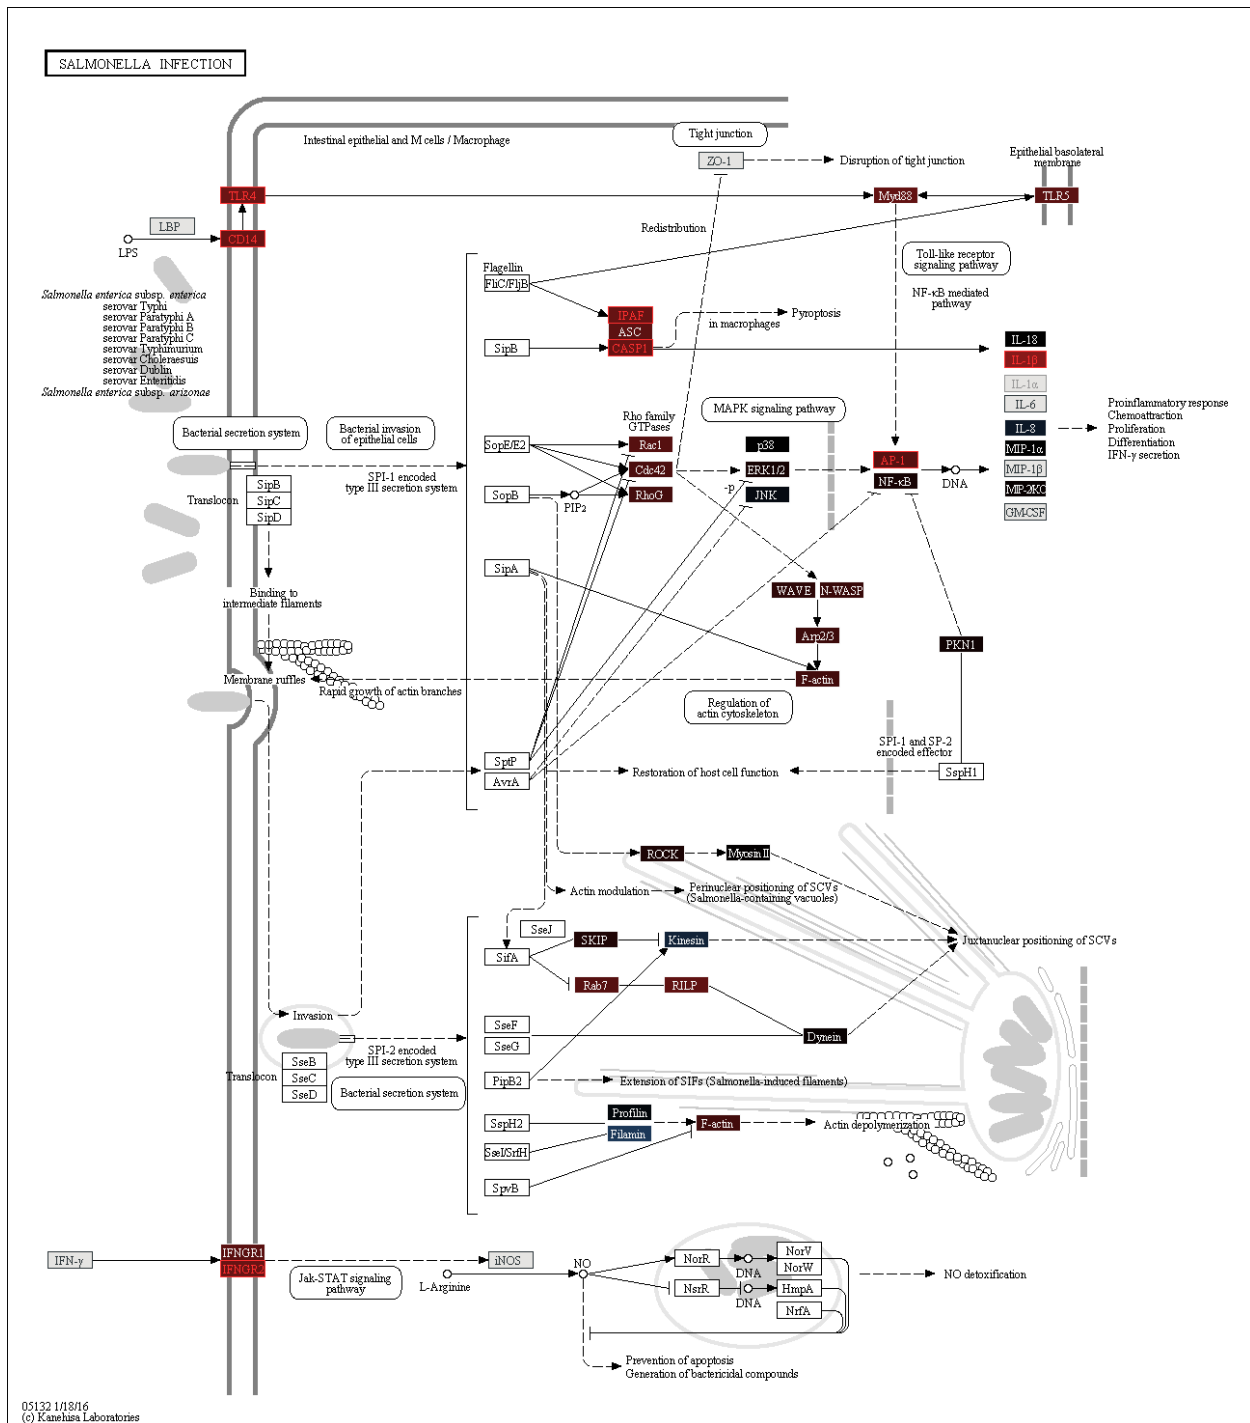

**Figure A40:** KEGG Pathway Map - Salmonella infection (RNA-Seq, PBMC, Day 1). Node color gradient encodes mean  $\log_2$  fold change difference between treatment groups (for multi-gene nodes the median fold change is used). In red: up-regulated for the SV-AS03 group compared to the SV-PBS group, in blue: down-regulated for the SV-AS03 group compared to the SV-PBS group, in black: fold change close to 1, in dark grey: genes filtered out due to low overall expression, light grey: gene missing database mapping, white: non-human gene. DE genes are highlighted using red (significantly up-regulated in the SV-AS03 group compared to the SV-PBS group) and blue (significantly down-regulated in the SV-AS03 group compared to the SV-PBS group) node label and border colors.

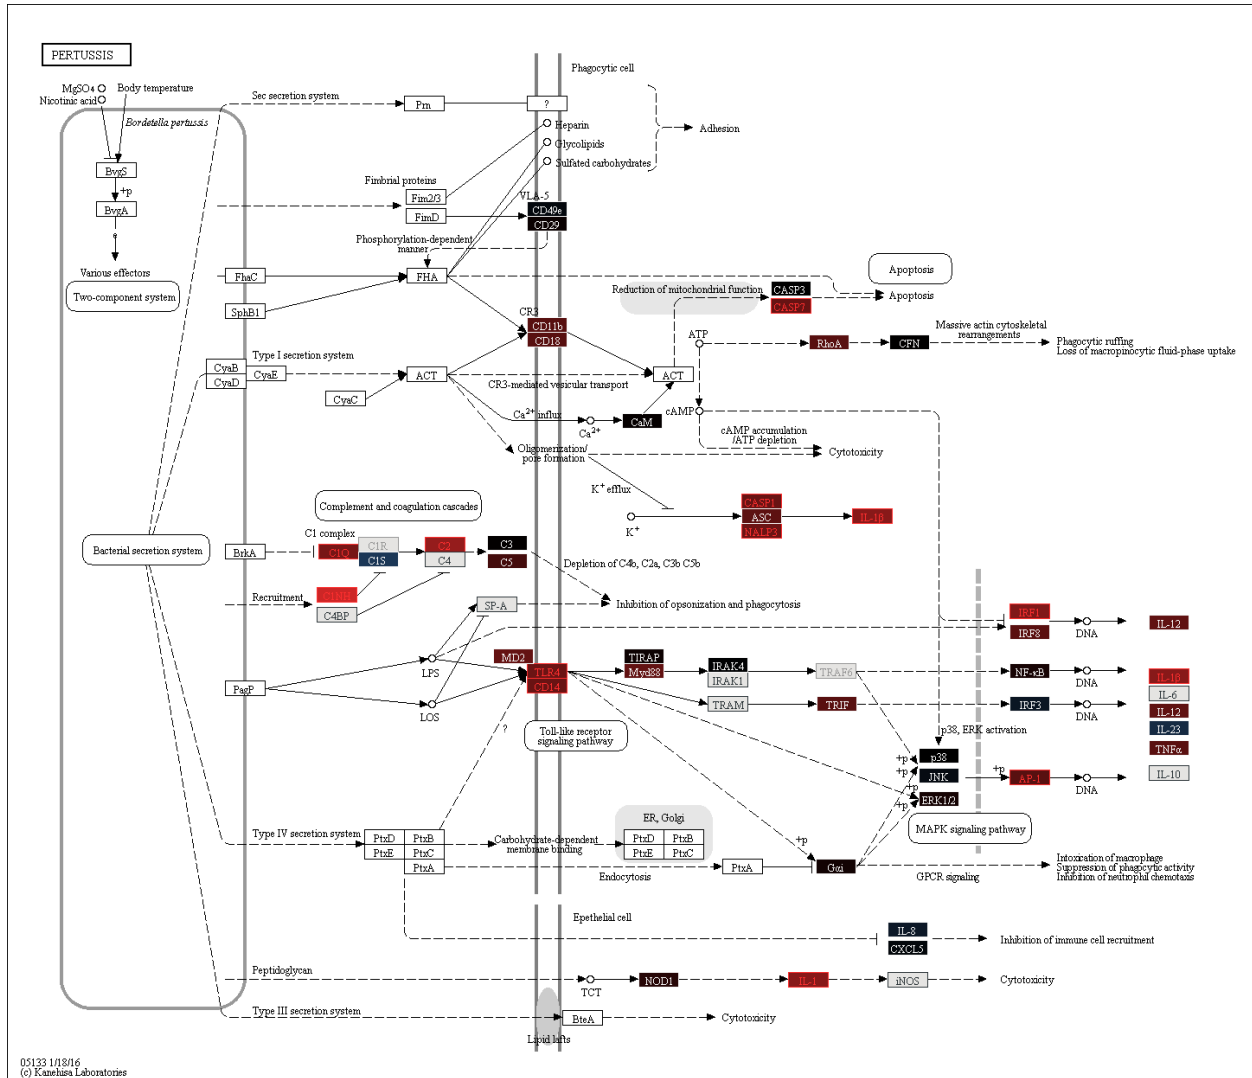

**Figure A41:** KEGG Pathway Map - Pertussis (RNA-Seq, PBMC, Day 1). Node color gradient encodes mean  $\log_2$  fold change difference between treatment groups (for multi-gene nodes the median fold change is used). In red: up-regulated for the SV-AS03 group compared to the SV-PBS group, in blue: down-regulated for the SV-AS03 group compared to the SV-PBS group, in black: fold change close to 1, in dark grey: genes filtered out due to low overall expression, light grey: gene missing database mapping, white: non-human gene. DE genes are highlighted using red (significantly up-regulated in the SV-AS03 group compared to the SV-PBS group) and blue (significantly down-regulated in the SV-AS03 group compared to the SV-PBS group) node label and border colors.

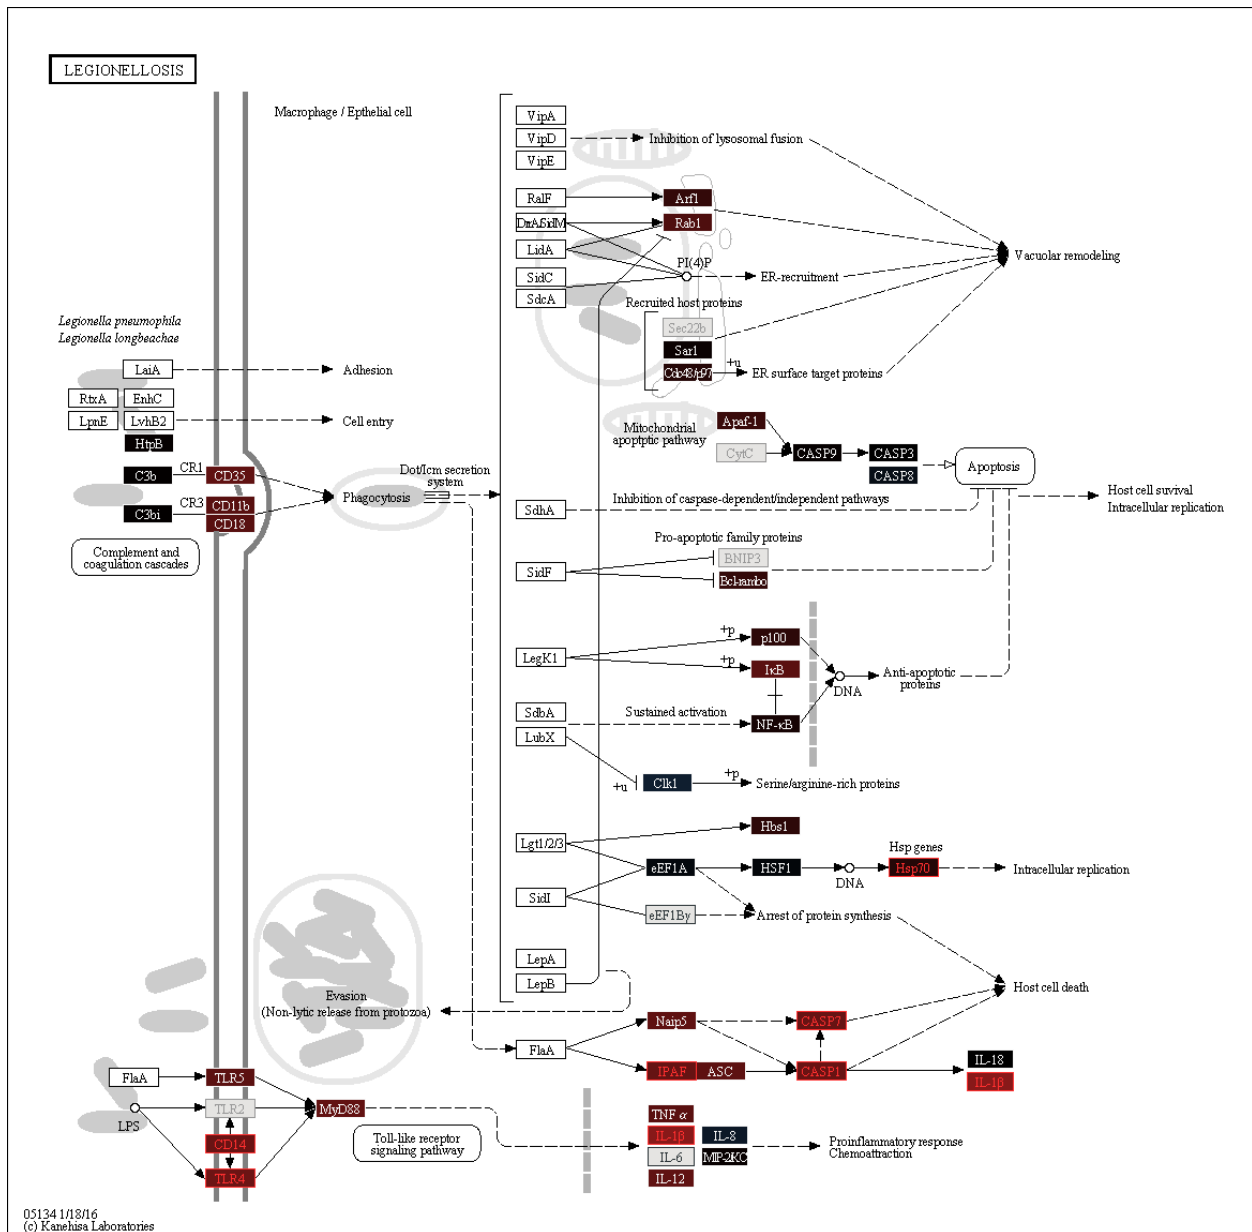

**Figure A42:** KEGG Pathway Map - Legionellosis (RNA-Seq, PBMC, Day 1). Node color gradient encodes mean  $\log_2$  fold change difference between treatment groups (for multi-gene nodes the median fold change is used). In red: up-regulated for the SV-AS03 group compared to the SV-PBS group, in blue: down-regulated for the SV-AS03 group compared to the SV-PBS group, in black: fold change close to 1, in dark grey: genes filtered out due to low overall expression, light grey: gene missing database mapping, white: non-human gene. DE genes are highlighted using red (significantly up-regulated in the SV-AS03 group compared to the SV-PBS group) and blue (significantly down-regulated in the SV-AS03 group compared to the SV-PBS group) node label and border colors.

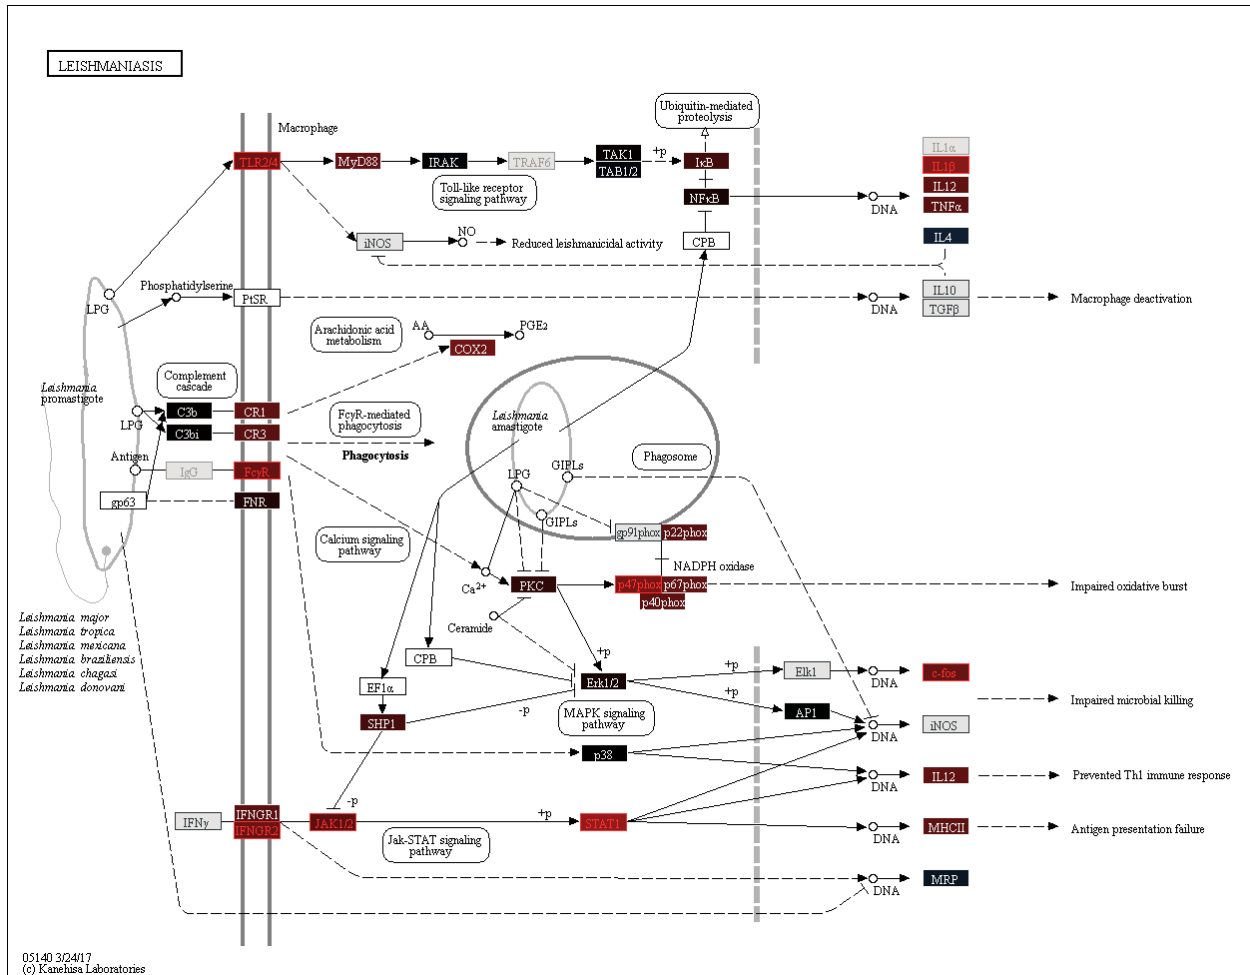

**Figure A43:** KEGG Pathway Map - Leishmaniasis (RNA-Seq, PBMC, Day 1). Node color gradient encodes mean  $\log_2$  fold change difference between treatment groups (for multi-gene nodes the median fold change is used). In red: up-regulated for the SV-AS03 group compared to the SV-PBS group, in blue: down-regulated for the SV-AS03 group compared to the SV-PBS group, in black: fold change close to 1, in dark grey: genes filtered out due to low overall expression, light grey: gene missing database mapping, white: non-human gene. DE genes are highlighted using red (significantly up-regulated in the SV-AS03 group compared to the SV-PBS group) and blue (significantly down-regulated in the SV-AS03 group compared to the SV-PBS group) node label and border colors.

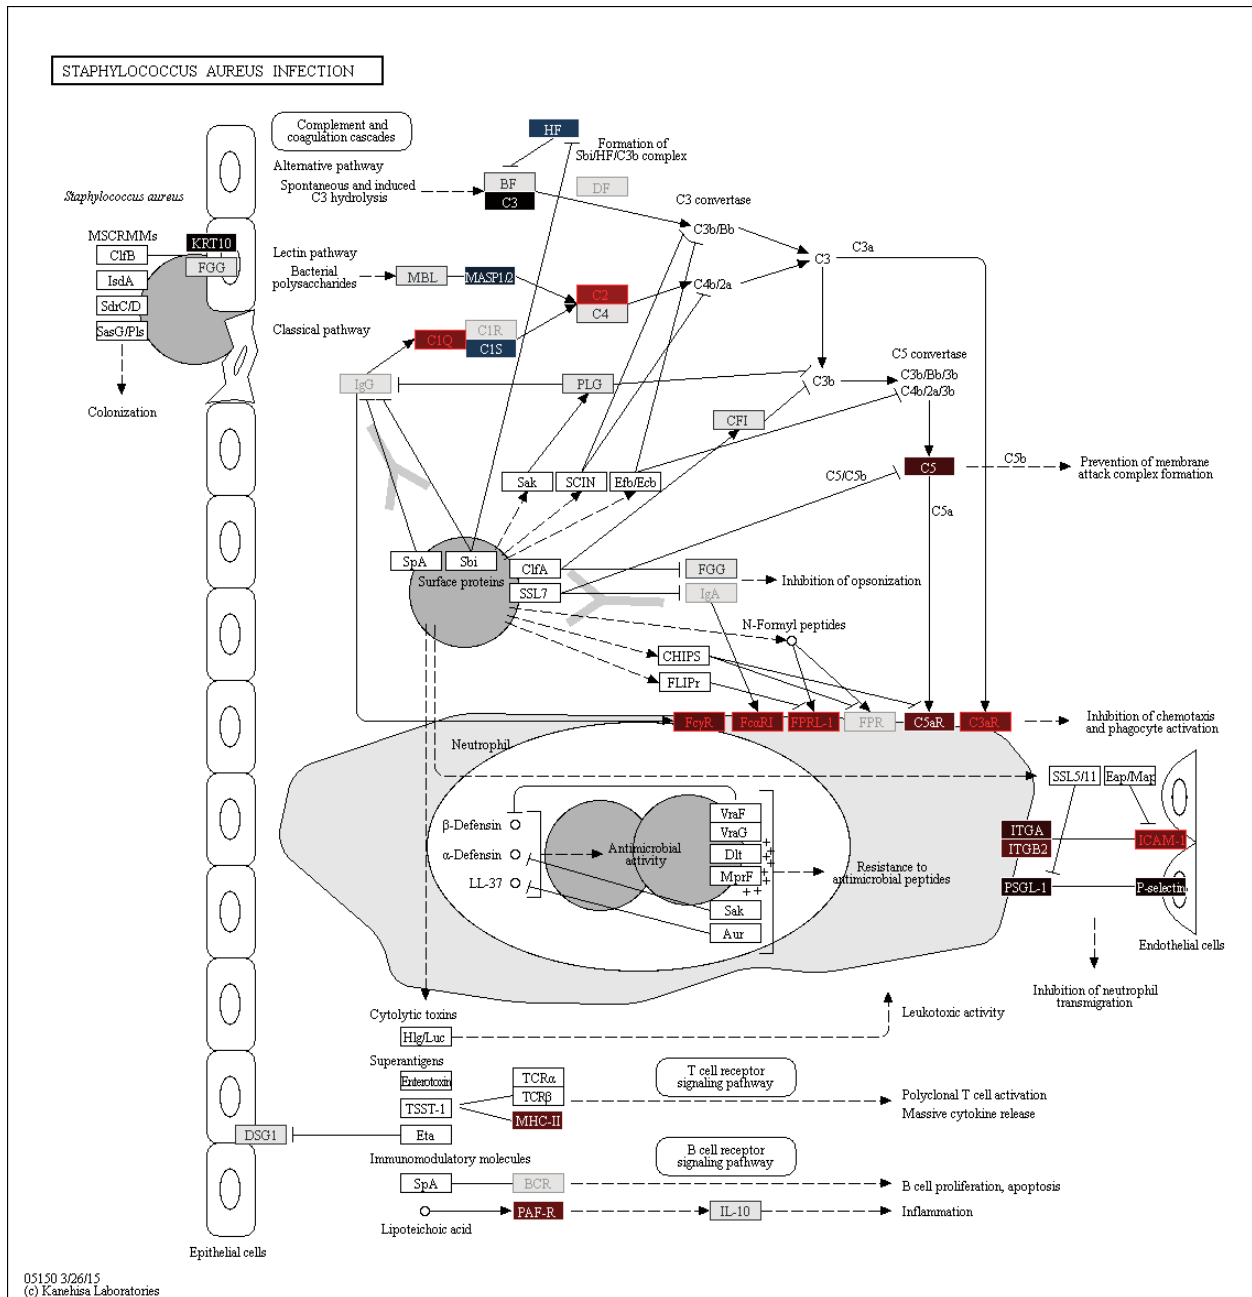

**Figure A44:** KEGG Pathway Map - *Staphylococcus aureus* infection (RNA-Seq, PBMC, Day 1). Node color gradient encodes mean  $\log_2$  fold change difference between treatment groups (for multi-gene nodes the median fold change is used). In red: up-regulated for the SV-AS03 group compared to the SV-PBS group, in blue: down-regulated for the SV-AS03 group compared to the SV-PBS group, in black: fold change close to 1, in dark grey: genes filtered out due to low overall expression, light grey: gene missing database mapping, white: non-human gene. DE genes are highlighted using red (significantly up-regulated in the SV-AS03 group compared to the SV-PBS group) and blue (significantly down-regulated in the SV-AS03 group compared to the SV-PBS group) node label and border colors.

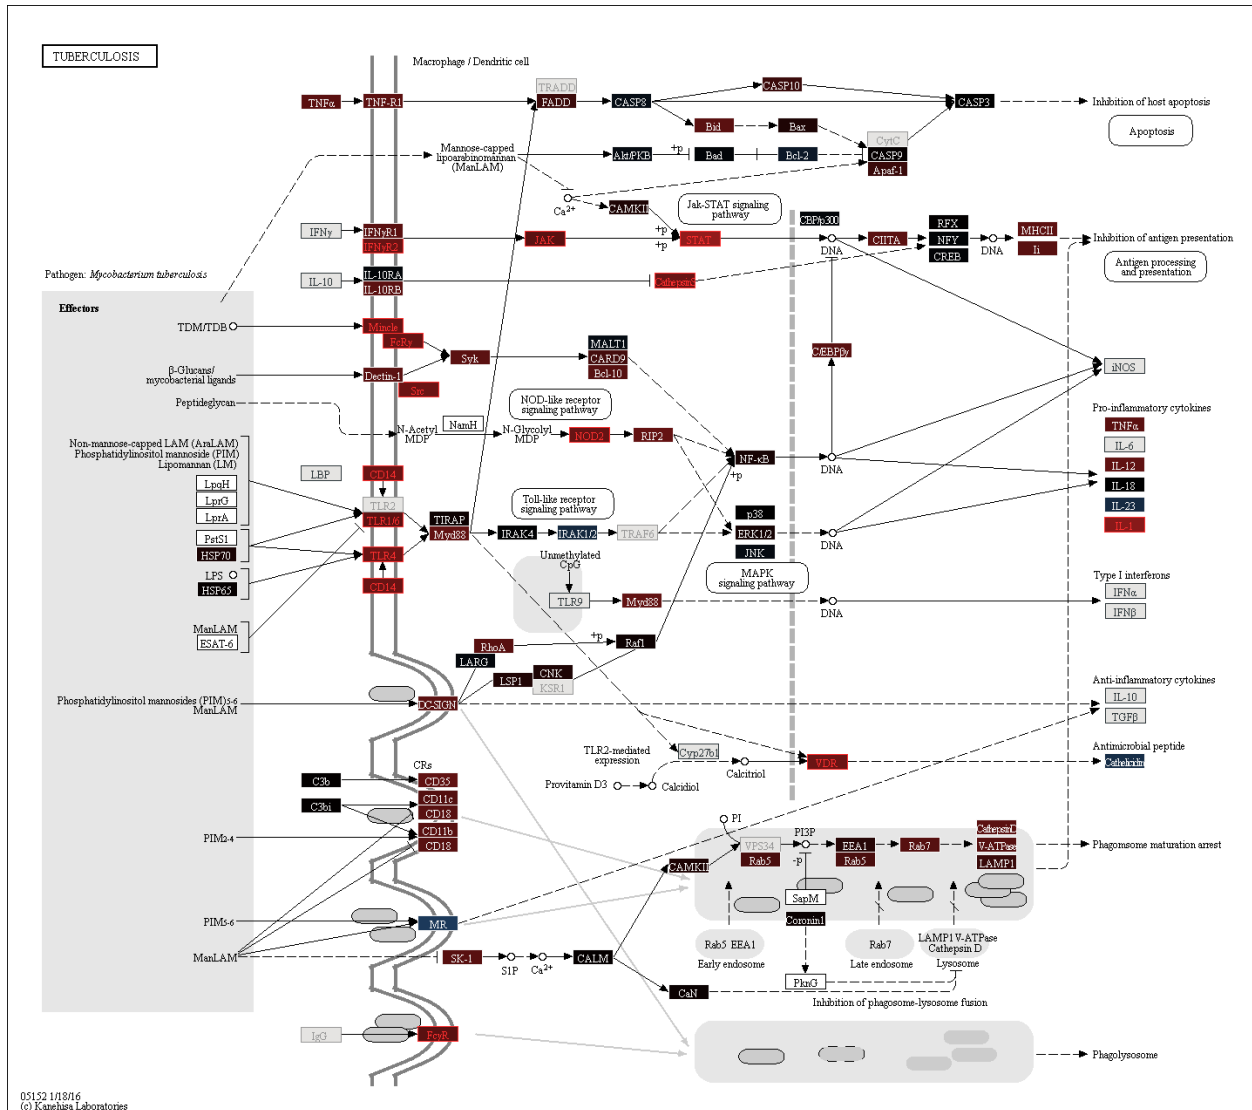

**Figure A45:** KEGG Pathway Map - Tuberculosis (RNA-Seq, PBMC, Day 1). Node color gradient encodes mean  $\log_2$  fold change difference between treatment groups (for multi-gene nodes the median fold change is used). In red: up-regulated for the SV-AS03 group compared to the SV-PBS group, in blue: down-regulated for the SV-AS03 group compared to the SV-PBS group, in black: fold change close to 1, in dark grey: genes filtered out due to low overall expression, light grey: gene missing database mapping, white: non-human gene. DE genes are highlighted using red (significantly up-regulated in the SV-AS03 group compared to the SV-PBS group) and blue (significantly down-regulated in the SV-AS03 group compared to the SV-PBS group) node label and border colors.

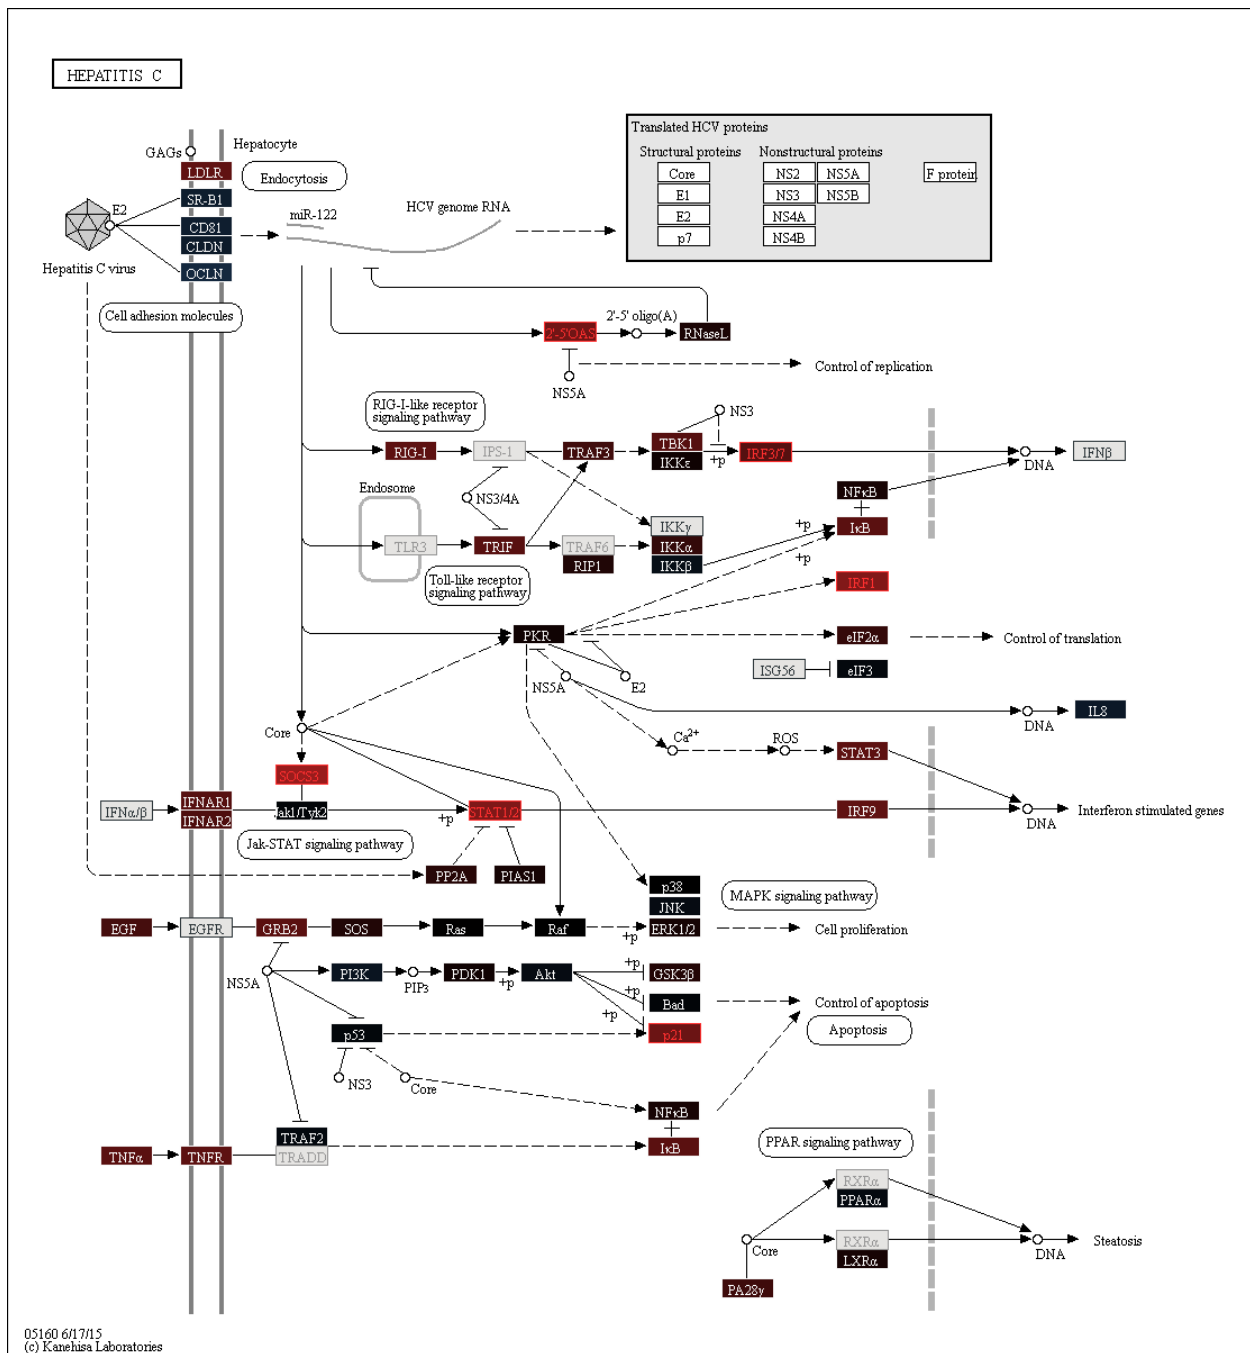

**Figure A46:** KEGG Pathway Map - Hepatitis C (RNA-Seq, PBMC, Day 1). Node color gradient encodes mean  $\log_2$  fold change difference between treatment groups (for multi-gene nodes the median fold change is used). In red: up-regulated for the SV-AS03 group compared to the SV-PBS group, in blue: down-regulated for the SV-AS03 group compared to the SV-PBS group, in black: fold change close to 1, in dark grey: genes filtered out due to low overall expression, light grey: gene missing database mapping, white: non-human gene. DE genes are highlighted using red (significantly up-regulated in the SV-AS03 group compared to the SV-PBS group) and blue (significantly down-regulated in the SV-AS03 group compared to the SV-PBS group) node label and border colors.



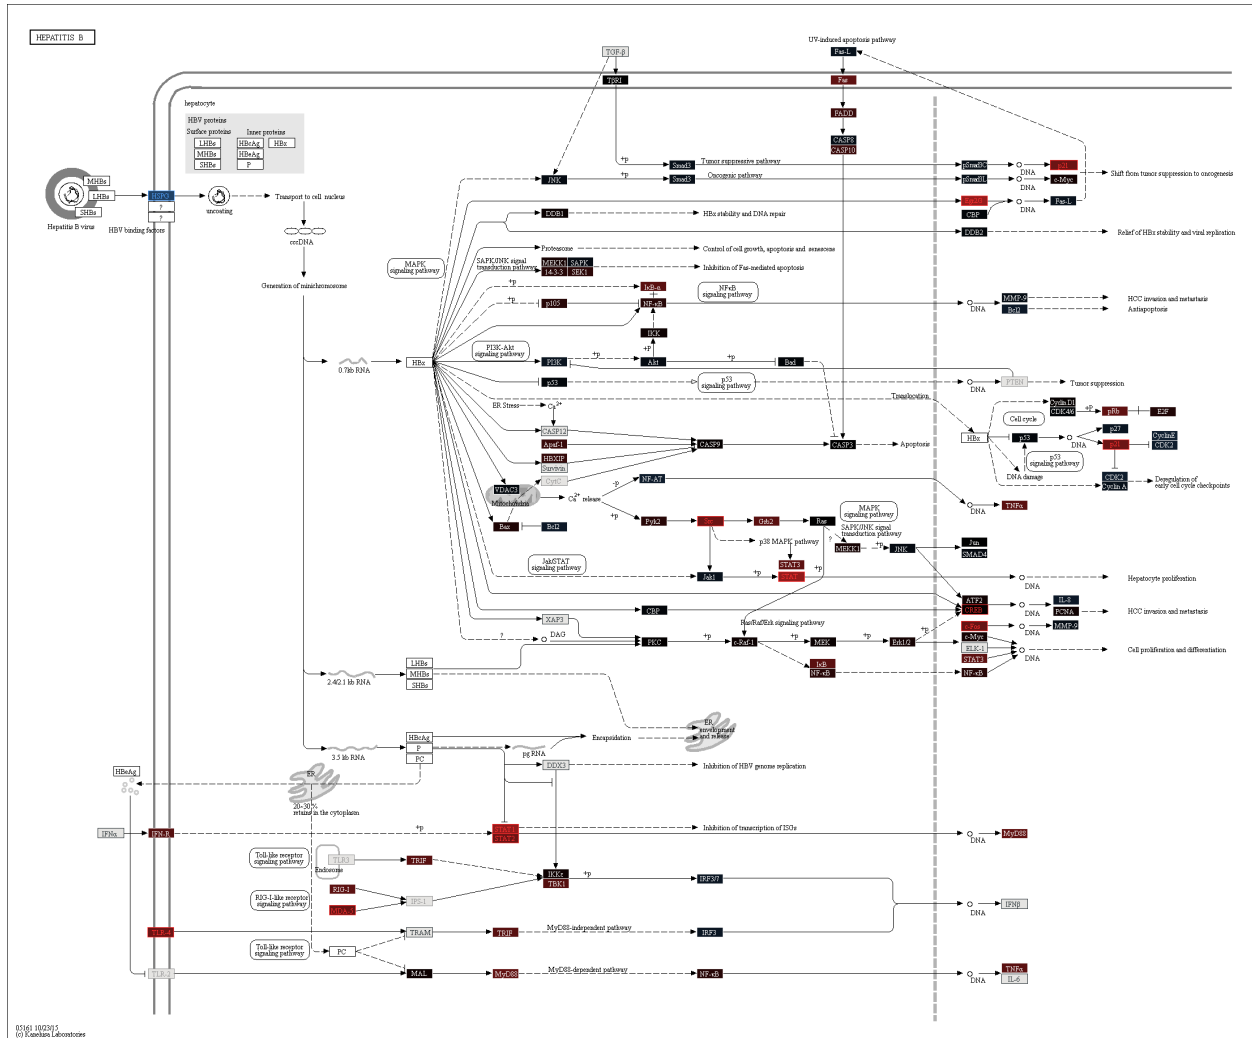

**Figure A47:** KEGG Pathway Map - Hepatitis B (RNA-Seq, PBMC, Day 1). Node color gradient encodes mean  $\log_2$  fold change difference between treatment groups (for multi-gene nodes the median fold change is used). In red: up-regulated for the SV-AS03 group compared to the SV-PBS group, in blue: down-regulated for the SV-AS03 group compared to the SV-PBS group, in black: fold change close to 1, in dark grey: genes filtered out due to low overall expression, light grey: gene missing database mapping, white: non-human gene. DE genes are highlighted using red (significantly up-regulated in the SV-AS03 group compared to the SV-PBS group) and blue (significantly down-regulated in the SV-AS03 group compared to the SV-PBS group) node label and border colors.

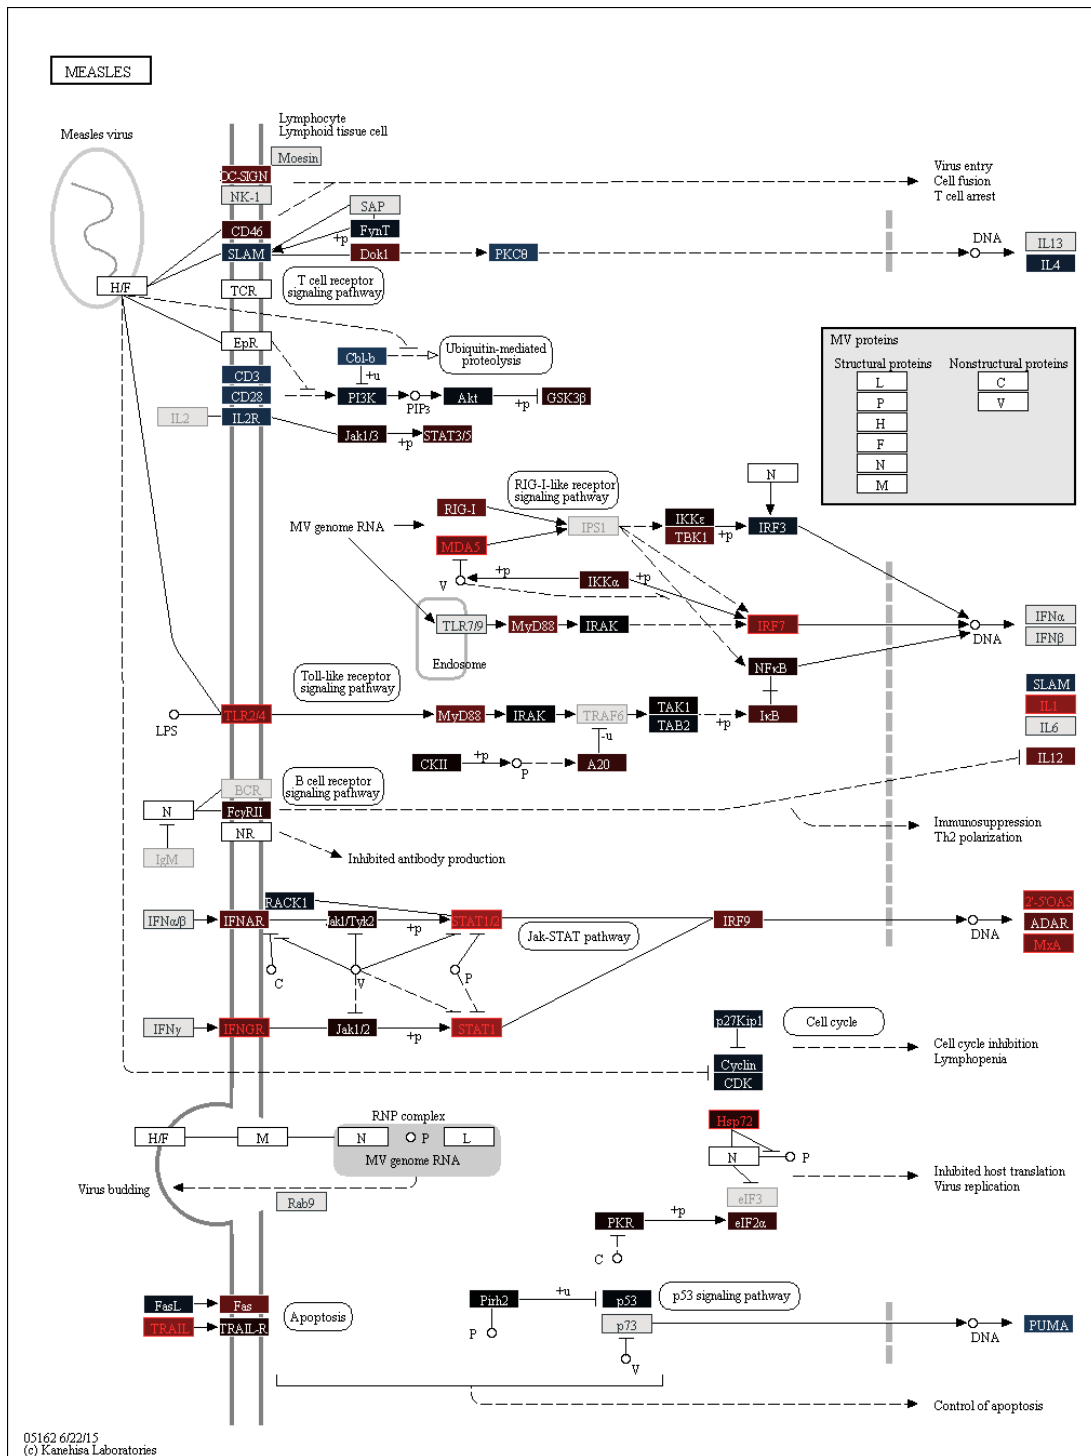

**Figure A48:** KEGG Pathway Map - Measles (RNA-Seq, PBMC, Day 1). Node color gradient encodes mean  $\log_2$  fold change difference between treatment groups (for multi-gene nodes the median fold change is used). In red: up-regulated for the SV-AS03 group compared to the SV-PBS group, in blue: down-regulated for the SV-AS03 group compared to the SV-PBS group, in black: fold change close to 1, in dark grey: genes filtered out due to low overall expression, light grey: gene missing database mapping, white: non-human gene. DE genes are highlighted using red (significantly up-regulated in the SV-AS03 group compared to the SV-PBS group) and blue (significantly down-regulated in the SV-AS03 group compared to the SV-PBS group) node label and border colors.

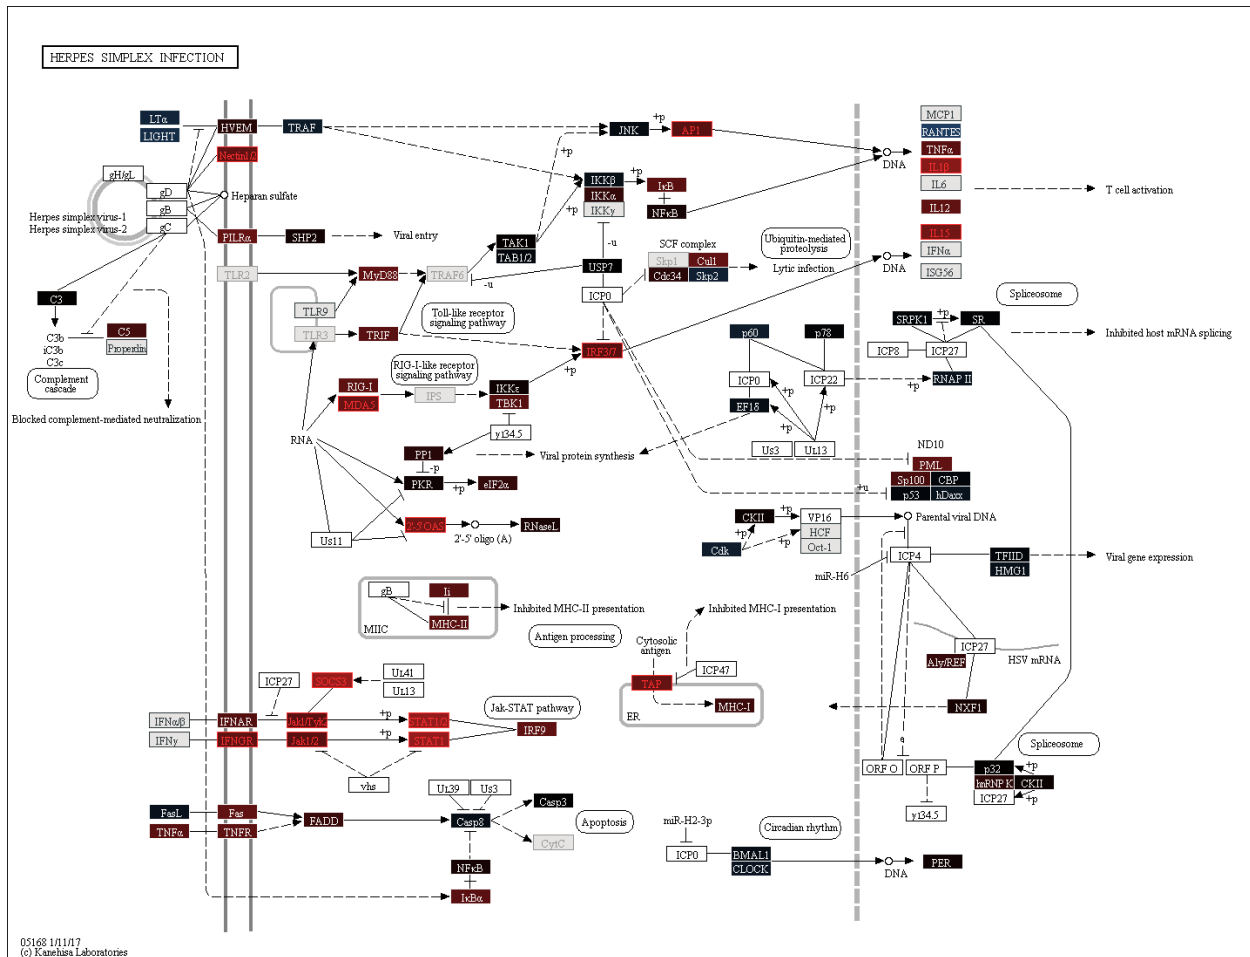

**Figure A49:** KEGG Pathway Map - Herpes simplex infection (RNA-Seq, PBMC, Day 1). Node color gradient encodes mean  $\log_2$  fold change difference between treatment groups (for multi-gene nodes the median fold change is used). In red: up-regulated for the SV-AS03 group compared to the SV-PBS group, in blue: down-regulated for the SV-AS03 group compared to the SV-PBS group, in black: fold change close to 1, in dark grey: genes filtered out due to low overall expression, light grey: gene missing database mapping, white: non-human gene. DE genes are highlighted using red (significantly up-regulated in the SV-AS03 group compared to the SV-PBS group) and blue (significantly down-regulated in the SV-AS03 group compared to the SV-PBS group) node label and border colors.

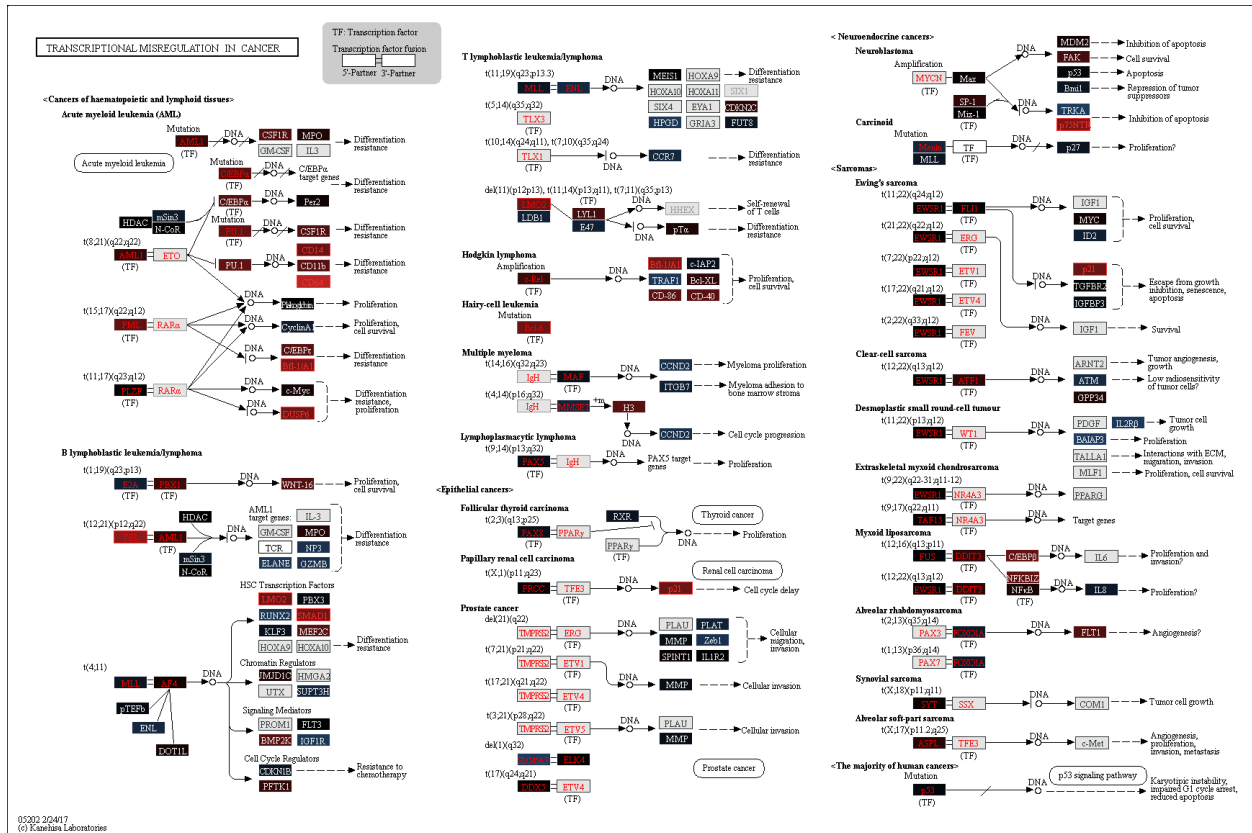





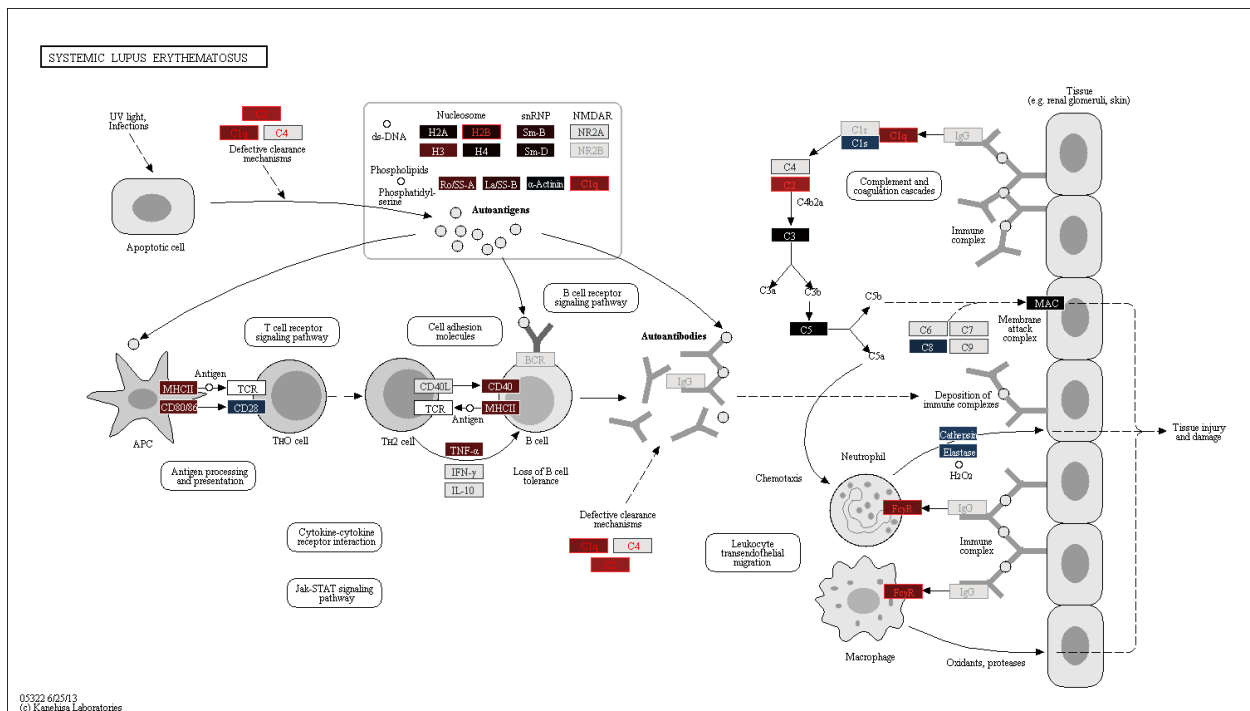

**Figure A53:** KEGG Pathway Map - Systemic lupus erythematosus (RNA-Seq, PBMC, Day 1). Node color gradient encodes mean  $\log_2$  fold change difference between treatment groups (for multi-gene nodes the median fold change is used). In red: up-regulated for the SV-AS03 group compared to the SV-PBS group, in blue: down-regulated for the SV-AS03 group compared to the SV-PBS group, in black: fold change close to 1, in dark grey: genes filtered out due to low overall expression, light grey: gene missing database mapping, white: non-human gene. DE genes are highlighted using red (significantly up-regulated in the SV-AS03 group compared to the SV-PBS group) and blue (significantly down-regulated in the SV-AS03 group compared to the SV-PBS group) node label and border colors.





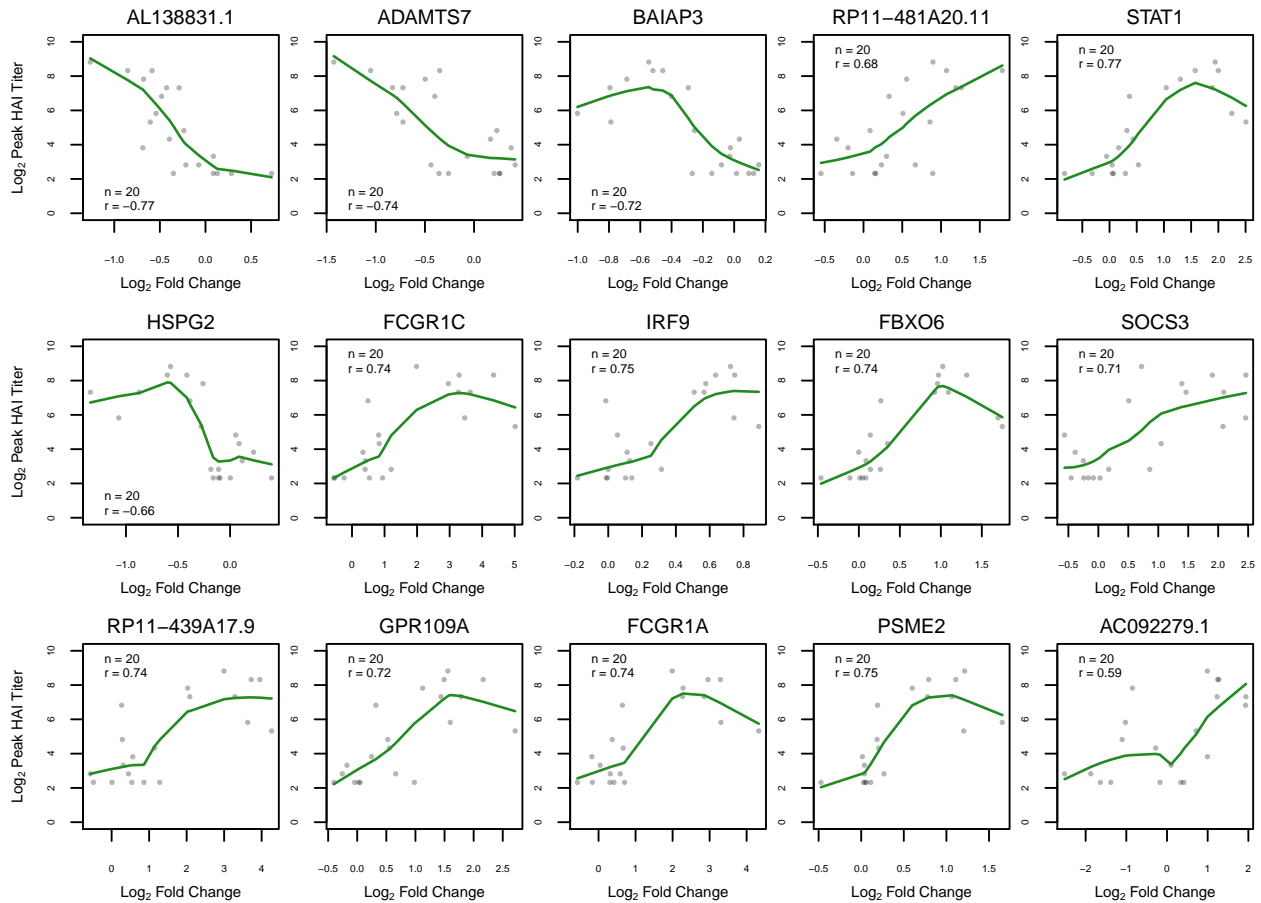

**Figure A55:** Scatterplots that summarize the correlation between peak  $\log_2$  HAI titer and  $\log_2$  fold change response for genes identified using regularized linear regression (RNA-Seq, PBMC, Day 1). Sorted by absolute descending regularized linear regression coefficient. The green solid trend line represents a locally weighted regression fit.

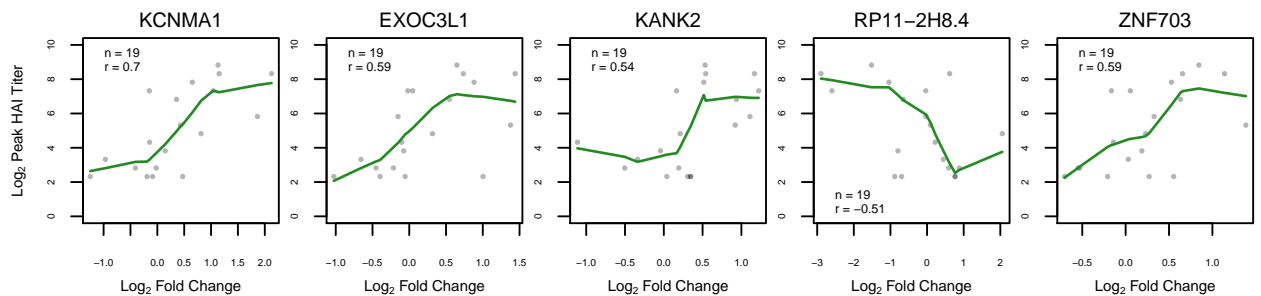

**Figure A56:** Scatterplots that summarize the correlation between peak  $\log_2$  HAI titer and  $\log_2$  fold change response for genes identified using regularized linear regression (RNA-Seq, PBMC, Day 3). Sorted by absolute descending regularized linear regression coefficient. The green solid trend line represents a locally weighted regression fit.

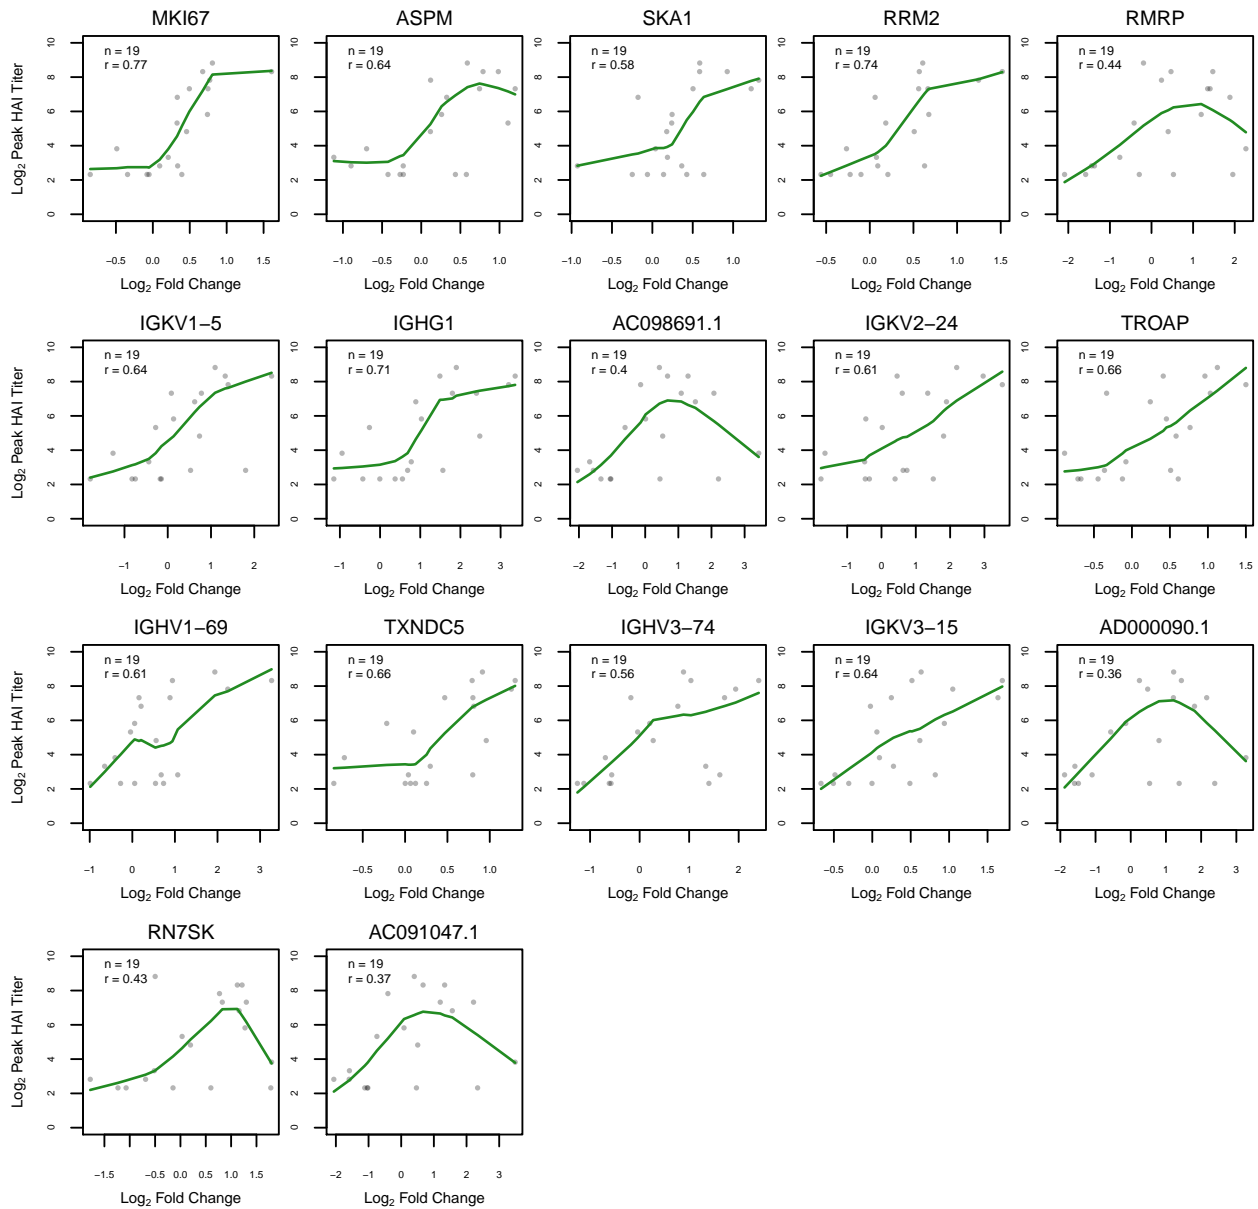

**Figure A57:** Scatterplots that summarize the correlation between peak  $\log_2$  HAI titer and  $\log_2$  fold change response for genes identified using regularized linear regression (RNA-Seq, PBMC, Day 7). Sorted by absolute descending regularized linear regression coefficient. The green solid trend line represents a locally weighted regression fit.

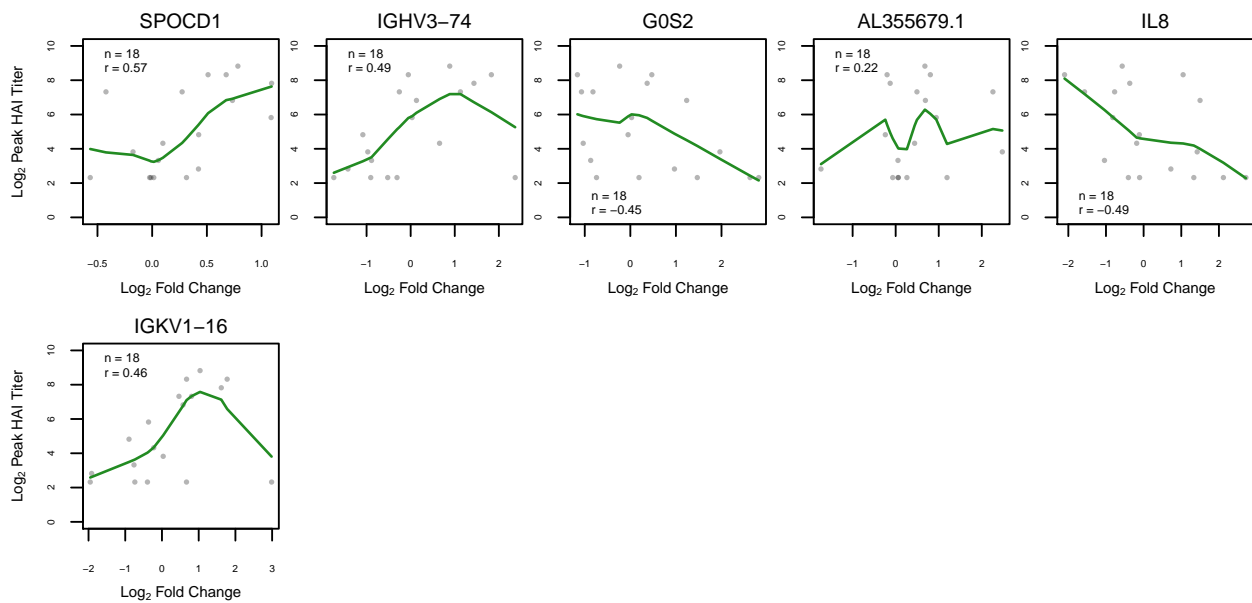

**Figure A58:** Scatterplots that summarize the correlation between peak  $\log_2$  HAI titer and  $\log_2$  fold change response for genes identified using regularized linear regression (RNA-Seq, PBMC, Day 28). Sorted by absolute descending regularized linear regression coefficient. The green solid trend line represents a locally weighted regression fit.

## Tables

| Category/Chromosome | #Genes |
|---------------------|--------|
| Mt_rRNA             | 2      |
| Mt_tRNA             | 22     |
| Mt_tRNA_pseudogene  | 580    |
| rRNA                | 530    |
| rRNA_pseudogene     | 179    |
| tRNA_pseudogene     | 128    |
| X                   | 2326   |
| Y                   | 509    |
| Total               | 4185   |

**Table A1:** Number of excluded genes by category/chromosome (RNA-Seq, PBMC).

|      | Day 1 | Day 3 | Day 7 | Day 28 | Day 1-28 |
|------|-------|-------|-------|--------|----------|
| PBMC | 14513 | 14547 | 14525 | 14491  | 14793    |

**Table A2:** Number of genes that passed the low expression cut off (RNA-Seq, PBMC).

|                                                | Min   | Q1    | Median | Mean  | Q3    | Max   | SD   | MAD  |
|------------------------------------------------|-------|-------|--------|-------|-------|-------|------|------|
| Total Mapped Reads [ $10^6$ ]                  | 27.43 | 46.09 | 47.91  | 48.34 | 50.71 | 63.98 | 4.39 | 3.24 |
| Uniquely Mapped Reads [ $10^6$ ]               | 24.42 | 43.30 | 45.08  | 45.43 | 47.66 | 60.41 | 4.16 | 2.85 |
| Uniquely Mapped Reads [%]                      | 89.00 | 93.70 | 94.00  | 93.97 | 94.20 | 95.00 | 0.58 | 0.37 |
| Paired Reads (Mapped to Different Chromosomes) | 0.00  | 0.00  | 0.00   | 0.00  | 0.00  | 0.00  | 0.00 | 0.00 |
| Counted Fragments [ $10^6$ ]                   | 13.02 | 16.54 | 17.19  | 17.38 | 18.21 | 21.62 | 1.40 | 1.26 |
| Median GC [%]                                  | 50.00 | 52.00 | 52.00  | 51.65 | 52.00 | 54.00 | 0.80 | 0.00 |
| Mean GC [%]                                    | 49.99 | 50.80 | 51.08  | 51.11 | 51.37 | 53.02 | 0.47 | 0.43 |
| Illumina Flow Cells                            | 2.00  | 2.00  | 2.00   | 2.38  | 3.00  | 3.00  | 0.49 | 0.00 |
| Illumina Flow Lanes                            | 3.00  | 4.00  | 4.00   | 3.89  | 4.00  | 4.00  | 0.31 | 0.00 |

**Table A3:** Summary statistics (RNA-Seq, PBMC, technical variables)

|                                 | Min    | Q1     | Median | Mean   | Q3     | Max    | SD    | MAD   |
|---------------------------------|--------|--------|--------|--------|--------|--------|-------|-------|
| Exon Tags [%]                   | 81.80  | 85.77  | 86.71  | 86.55  | 87.45  | 89.63  | 1.44  | 1.25  |
| Intron Tags [%]                 | 9.20   | 11.19  | 11.89  | 12.02  | 12.74  | 16.45  | 1.32  | 1.18  |
| Intergenic Tags [%]             | 1.15   | 1.35   | 1.42   | 1.43   | 1.50   | 1.99   | 0.13  | 0.11  |
| CDS Exons Tags Per Kb           | 303.85 | 503.98 | 526.64 | 529.11 | 558.25 | 659.01 | 47.88 | 38.68 |
| Intron Tags Per Kb              | 2.53   | 4.34   | 4.72   | 4.78   | 5.14   | 8.06   | 0.72  | 0.61  |
| 3' UTR Tags Per Kb              | 155.12 | 262.07 | 274.36 | 276.68 | 292.00 | 354.06 | 26.24 | 22.15 |
| 5' UTR Tags Per Kb              | 108.89 | 159.68 | 170.63 | 170.99 | 180.16 | 221.31 | 15.89 | 14.57 |
| TSS upstream 10Kb Tags Per Kb   | 0.47   | 0.76   | 0.82   | 0.83   | 0.88   | 1.70   | 0.13  | 0.09  |
| TES downstream 10Kb Tags Per Kb | 1.39   | 2.41   | 2.58   | 2.60   | 2.78   | 4.18   | 0.36  | 0.26  |
| Splicing Events [ $10^5$ ]      | 38.03  | 64.64  | 68.50  | 68.68  | 72.78  | 85.03  | 6.59  | 5.86  |
| Splicing Junctions [ $10^5$ ]   | 1.37   | 1.51   | 1.52   | 1.52   | 1.53   | 1.61   | 0.02  | 0.01  |

**Table A4:** Summary statistics (RNA-Seq, PBMC, gene model variables)

|                                  | 1st PC (12.9%)<br>Before TMM<br>Normalization. | 2nd PC (7.9%)<br>Before TMM<br>Normalization. | 1st PC (13%)<br>After TMM<br>Normalization. | 2nd PC (7.9%)<br>After TMM<br>Normalization. |
|----------------------------------|------------------------------------------------|-----------------------------------------------|---------------------------------------------|----------------------------------------------|
| Total Mapped Reads [ $10^6$ ]    | -0.13                                          | -0.30                                         | -0.13                                       | -0.29                                        |
| Uniquely Mapped Reads [ $10^6$ ] | -0.10                                          | -0.28                                         | -0.10                                       | -0.28                                        |
| Uniquely Mapped Reads [%]        | 0.59                                           | 0.26                                          | 0.61                                        | 0.23                                         |
| Median GC [%]                    | 0.31                                           | 0.16                                          | 0.31                                        | 0.15                                         |
| Mean GC [%]                      | 0.44                                           | 0.32                                          | 0.43                                        | 0.31                                         |
| Illumina Flow Cells [#]          | 0.06                                           | 0.21                                          | 0.06                                        | 0.21                                         |
| Illumina Flow Lanes [#]          | -0.07                                          | -0.28                                         | -0.07                                       | -0.28                                        |

**Table A5:** Spearman correlation with technical variables (RNA-Seq, PBMC, original variables).

|                                  | 1st PC (18.7%)<br>Before TMM<br>Normalization. | 2nd PC (9.6%)<br>Before TMM<br>Normalization. | 1st PC (17.8%)<br>After TMM<br>Normalization. | 2nd PC (10.1%)<br>After TMM<br>Normalization. |
|----------------------------------|------------------------------------------------|-----------------------------------------------|-----------------------------------------------|-----------------------------------------------|
| Total Mapped Reads [ $10^6$ ]    | 0.15                                           | 0.13                                          | 0.14                                          | -0.15                                         |
| Uniquely Mapped Reads [ $10^6$ ] | 0.12                                           | 0.16                                          | 0.12                                          | -0.17                                         |
| Uniquely Mapped Reads [%]        | -0.51                                          | 0.43                                          | -0.54                                         | -0.39                                         |
| Median GC [%]                    | -0.33                                          | -0.11                                         | -0.35                                         | 0.15                                          |
| Mean GC [%]                      | -0.47                                          | -0.32                                         | -0.50                                         | 0.37                                          |
| Illumina Flow Cells [#]          | -0.05                                          | -0.13                                         | -0.06                                         | 0.16                                          |
| Illumina Flow Lanes [#]          | 0.09                                           | 0.26                                          | 0.10                                          | -0.26                                         |

**Table A6:** Spearman correlation with technical variables (RNA-Seq, PBMC, standardized variables).

|                                 | 1st PC (12.9%)<br>Before TMM<br>Normalization. | 2nd PC (7.9%)<br>Before TMM<br>Normalization. | 1st PC (13%)<br>After TMM<br>Normalization. | 2nd PC (7.9%)<br>After TMM<br>Normalization. |
|---------------------------------|------------------------------------------------|-----------------------------------------------|---------------------------------------------|----------------------------------------------|
| Exon Tags [%]                   | 0.26                                           | 0.25                                          | 0.24                                        | 0.28                                         |
| Intron Tags [%]                 | -0.24                                          | -0.25                                         | -0.23                                       | -0.28                                        |
| Intergenic Tags [%]             | -0.47                                          | -0.24                                         | -0.45                                       | -0.26                                        |
| CDS Exons Tags Per Kb           | -0.08                                          | -0.20                                         | -0.08                                       | -0.19                                        |
| Intron Tags Per Kb              | -0.27                                          | -0.36                                         | -0.26                                       | -0.38                                        |
| 3' UTR Tags Per Kb              | 0.02                                           | -0.21                                         | 0.02                                        | -0.21                                        |
| 5' UTR Tags Per Kb              | 0.09                                           | -0.05                                         | 0.09                                        | -0.05                                        |
| TSS upstream 10Kb Tags Per Kb   | -0.43                                          | -0.44                                         | -0.42                                       | -0.45                                        |
| TES downstream 10Kb Tags Per Kb | -0.43                                          | -0.34                                         | -0.42                                       | -0.35                                        |
| Splicing Events [ $10^5$ ]      | -0.01                                          | -0.09                                         | -0.01                                       | -0.08                                        |

**Table A7:** Spearman correlation with gene model variables (RNA-Seq, PBMC, original variables).

|                                 | 1st PC (18.7%)<br>Before TMM<br>Normalization. | 2nd PC (9.6%)<br>Before TMM<br>Normalization. | 1st PC (17.8%)<br>After TMM<br>Normalization. | 2nd PC (10.1%)<br>After TMM<br>Normalization. |
|---------------------------------|------------------------------------------------|-----------------------------------------------|-----------------------------------------------|-----------------------------------------------|
| Exon Tags [%]                   | -0.37                                          | -0.82                                         | -0.37                                         | 0.83                                          |
| Intron Tags [%]                 | 0.35                                           | 0.82                                          | 0.36                                          | -0.83                                         |
| Intergenic Tags [%]             | 0.57                                           | 0.70                                          | 0.57                                          | -0.71                                         |
| CDS Exons Tags Per Kb           | 0.06                                           | -0.13                                         | 0.06                                          | 0.11                                          |
| Intron Tags Per Kb              | 0.37                                           | 0.72                                          | 0.37                                          | -0.74                                         |
| 3' UTR Tags Per Kb              | 0.00                                           | 0.13                                          | -0.01                                         | -0.14                                         |
| 5' UTR Tags Per Kb              | -0.11                                          | -0.11                                         | -0.12                                         | 0.11                                          |
| TSS upstream 10Kb Tags Per Kb   | 0.49                                           | 0.55                                          | 0.51                                          | -0.58                                         |
| TES downstream 10Kb Tags Per Kb | 0.51                                           | 0.57                                          | 0.51                                          | -0.59                                         |
| Splicing Events [ $10^5$ ]      | -0.03                                          | -0.22                                         | -0.04                                         | 0.21                                          |

**Table A8:** Spearman correlation with gene model variables (RNA-Seq, PBMC, standardized variables).

| Cluster ID | Cluster Size | Gene ID         | Gene Name | Gene Description                                                                                                            | $Log_2$ Fold Change |
|------------|--------------|-----------------|-----------|-----------------------------------------------------------------------------------------------------------------------------|---------------------|
| CPMCD1-001 | 2            | ENSG00000119922 | IFIT2     | interferon-induced protein with tetratricopeptide repeats 2 [Source:HGNC Symbol;Acc:5409]                                   | 1.65                |
| CPMCD1-001 | 2            | ENSG00000119917 | IFIT3     | interferon-induced protein with tetratricopeptide repeats 3 [Source:HGNC Symbol;Acc:5411]                                   | 1.83                |
| CPMCD1-002 | 2            | ENSG00000178719 | GRINA     | glutamate receptor, ionotropic, N-methyl D-aspartate-associated protein 1 (glutamate binding) [Source:HGNC Symbol;Acc:4589] | 0.64                |
| CPMCD1-002 | 2            | ENSG00000131042 | LILRB2    | leukocyte immunoglobulin-like receptor, subfamily B (with TM and ITIM domains), member 2 [Source:HGNC Symbol;Acc:6606]      | 0.71                |
| CPMCD1-003 | 2            | ENSG00000163131 | CTSS      | cathepsin S [Source:HGNC Symbol;Acc:2545]                                                                                   | 0.68                |
| CPMCD1-003 | 2            | ENSG00000163563 | MNDA      | myeloid cell nuclear differentiation antigen [Source:HGNC Symbol;Acc:7183]                                                  | 0.68                |

| Cluster ID | Cluster Size | Gene ID         | Gene Name  | Gene Description                                                                                                  | Log <sub>2</sub> Fold Change |
|------------|--------------|-----------------|------------|-------------------------------------------------------------------------------------------------------------------|------------------------------|
| CPMCD1-004 | 2            | ENSG0000010030  | ETV7       | ets variant 7 [Source:HGNC Symbol;Acc:18160]                                                                      | 2.54                         |
| CPMCD1-004 | 2            | ENSG00000170581 | STAT2      | signal transducer and activator of transcription 2, 113kDa [Source:HGNC Symbol;Acc:11363]                         | 0.73                         |
| CPMCD1-005 | 3            | ENSG00000163221 | S100A12    | S100 calcium binding protein A12 [Source:HGNC Symbol;Acc:10489]                                                   | 0.99                         |
| CPMCD1-005 | 3            | ENSG00000143546 | S100A8     | S100 calcium binding protein A8 [Source:HGNC Symbol;Acc:10498]                                                    | 0.96                         |
| CPMCD1-005 | 3            | ENSG00000163220 | S100A9     | S100 calcium binding protein A9 [Source:HGNC Symbol;Acc:10499]                                                    | 0.87                         |
| CPMCD1-006 | 2            | ENSG00000111321 | LTBR       | lymphotoxin beta receptor (TNFR superfamily, member 3) [Source:HGNC Symbol;Acc:6718]                              | 0.65                         |
| CPMCD1-006 | 2            | ENSG00000235568 | NFAM1      | NFAT activating protein with ITAM motif 1 [Source:HGNC Symbol;Acc:29872]                                          | 0.60                         |
| CPMCD1-007 | 2            | ENSG00000111335 | OAS2       | 2'-5'-oligoadenylate synthetase 2, 69/71kDa [Source:HGNC Symbol;Acc:8087]                                         | 0.72                         |
| CPMCD1-007 | 2            | ENSG00000111331 | OAS3       | 2'-5'-oligoadenylate synthetase 3, 100kDa [Source:HGNC Symbol;Acc:8088]                                           | 1.07                         |
| CPMCD1-008 | 2            | ENSG00000150337 | FCGR1A     | Fc fragment of IgG, high affinity Ia, receptor (CD64) [Source:HGNC Symbol;Acc:3613]                               | 2.54                         |
| CPMCD1-008 | 2            | ENSG00000198019 | FCGR1B     | Fc fragment of IgG, high affinity Ib, receptor (CD64) [Source:HGNC Symbol;Acc:3614]                               | 2.60                         |
| CPMCD1-009 | 2            | ENSG00000188906 | LRRK2      | leucine-rich repeat kinase 2 [Source:HGNC Symbol;Acc:18618]                                                       | 1.09                         |
| CPMCD1-009 | 2            | ENSG00000105967 | TFEC       | transcription factor EC [Source:HGNC Symbol;Acc:11754]                                                            | 0.99                         |
| CPMCD1-010 | 4            | ENSG00000085265 | FCN1       | ficolin (collagen/fibrinogen domain containing) 1 [Source:HGNC Symbol;Acc:3623]                                   | 0.65                         |
| CPMCD1-010 | 4            | ENSG00000151948 | GLT1D1     | glycosyltransferase 1 domain containing 1 [Source:HGNC Symbol;Acc:26483]                                          | 0.74                         |
| CPMCD1-010 | 4            | ENSG00000198736 | SEPX1      | selenoprotein X, 1 [Source:HGNC Symbol;Acc:14133]                                                                 | 0.67                         |
| CPMCD1-010 | 4            | ENSG00000197249 | SERPINA1   | serpin peptidase inhibitor, clade A (alpha-1 antiproteinase, antitrypsin), member 1 [Source:HGNC Symbol;Acc:8941] | 0.92                         |
| CPMCD1-011 | 2            | ENSG00000113916 | BCL6       | B-cell CLL/lymphoma 6 [Source:HGNC Symbol;Acc:1001]                                                               | 0.78                         |
| CPMCD1-011 | 2            | ENSG00000135821 | GLUL       | glutamate-ammonia ligase [Source:HGNC Symbol;Acc:4341]                                                            | 0.72                         |
| CPMCD1-012 | 2            | ENSG00000244682 | FCGR2C     | Fc fragment of IgG, low affinity IIc, receptor for (CD32) (gene/pseudogene) [Source:HGNC Symbol;Acc:15626]        | 0.83                         |
| CPMCD1-012 | 2            | ENSG00000225217 | HSPA7      | heat shock 70kDa protein 7 (HSP70B) [Source:HGNC Symbol;Acc:5240]                                                 | 0.76                         |
| CPMCD1-013 | 3            | ENSG00000204472 | AIF1       | allograft inflammatory factor 1 [Source:HGNC Symbol;Acc:352]                                                      | 0.60                         |
| CPMCD1-013 | 3            | ENSG00000158869 | FCER1G     | Fc fragment of IgE, high affinity I, receptor for; gamma polypeptide [Source:HGNC Symbol;Acc:3611]                | 0.64                         |
| CPMCD1-013 | 3            | ENSG00000119655 | NPC2       | Niemann-Pick disease, type C2 [Source:HGNC Symbol;Acc:14537]                                                      | 0.69                         |
| CPMCD1-014 | 2            | ENSG00000106780 | MEGF9      | multiple EGF-like-domains 9 [Source:HGNC Symbol;Acc:3234]                                                         | 0.59                         |
| CPMCD1-014 | 2            | ENSG00000168461 | RAB31      | RAB31, member RAS oncogene family [Source:HGNC Symbol;Acc:9771]                                                   | 0.61                         |
| CPMCD1-015 | 2            | ENSG00000119686 | AC007182.1 | Feline leukemia virus subgroup C receptor-related protein 2 [Source:UniProtKB/Swiss-Prot;Acc:Q9UPI3]              | 0.86                         |
| CPMCD1-015 | 2            | ENSG00000143382 | ADAMTSL4   | ADAMTS-like 4 [Source:HGNC Symbol;Acc:19706]                                                                      | 0.72                         |

| Cluster ID | Cluster Size | Gene ID         | Gene Name | Gene Description                                                                                 | Log <sub>2</sub> Fold Change |
|------------|--------------|-----------------|-----------|--------------------------------------------------------------------------------------------------|------------------------------|
| CPMCD1-016 | 2            | ENSG00000126709 | IFI6      | interferon, alpha-inducible protein 6 [Source:HGNC Symbol;Acc:4054]                              | 0.85                         |
| CPMCD1-016 | 2            | ENSG00000187608 | ISG15     | ISG15 ubiquitin-like modifier [Source:HGNC Symbol;Acc:4053]                                      | 0.82                         |
| CPMCD1-017 | 2            | ENSG00000188820 | FAM26F    | family with sequence similarity 26, member F [Source:HGNC Symbol;Acc:33391]                      | 1.49                         |
| CPMCD1-017 | 2            | ENSG00000041357 | PSMA4     | proteasome (prosome, macropain) subunit, alpha type, 4 [Source:HGNC Symbol;Acc:9533]             | 0.62                         |
| CPMCD1-018 | 4            | ENSG00000177989 | ODF3B     | outer dense fiber of sperm tails 3B [Source:HGNC Symbol;Acc:34388]                               | 1.39                         |
| CPMCD1-018 | 4            | ENSG00000023902 | PLEKHO1   | pleckstrin homology domain containing, family O member 1 [Source:HGNC Symbol;Acc:24310]          | 0.62                         |
| CPMCD1-018 | 4            | ENSG00000197122 | SRC       | v-src sarcoma (Schmidt-Ruppin A-2) viral oncogene homolog (avian) [Source:HGNC Symbol;Acc:11283] | 0.77                         |
| CPMCD1-018 | 4            | ENSG00000025708 | TYMP      | thymidine phosphorylase [Source:HGNC Symbol;Acc:3148]                                            | 1.38                         |
| CPMCD1-019 | 2            | ENSG00000205730 | ITPRIPL2  | inositol 1,4,5-trisphosphate receptor interacting protein-like 2 [Source:HGNC Symbol;Acc:27257]  | 0.65                         |
| CPMCD1-019 | 2            | ENSG00000113368 | LMNB1     | lamin B1 [Source:HGNC Symbol;Acc:6637]                                                           | 0.93                         |
| CPMCD1-020 | 3            | ENSG00000158517 | NCF1      | neutrophil cytosolic factor 1 [Source:HGNC Symbol;Acc:7660]                                      | 1.04                         |
| CPMCD1-020 | 3            | ENSG00000182487 | NCF1B     | neutrophil cytosolic factor 1B pseudogene [Source:HGNC Symbol;Acc:32522]                         | 0.88                         |
| CPMCD1-020 | 3            | ENSG00000165178 | NCF1C     | neutrophil cytosolic factor 1C pseudogene [Source:HGNC Symbol;Acc:32523]                         | 1.03                         |
| CPMCD1-021 | 7            | ENSG00000117228 | GBP1      | guanylate binding protein 1, interferon-inducible [Source:HGNC Symbol;Acc:4182]                  | 2.06                         |
| CPMCD1-021 | 7            | ENSG00000162645 | GBP2      | guanylate binding protein 2, interferon-inducible [Source:HGNC Symbol;Acc:4183]                  | 1.25                         |
| CPMCD1-021 | 7            | ENSG00000117226 | GBP3      | guanylate binding protein 3 [Source:HGNC Symbol;Acc:4184]                                        | 0.71                         |
| CPMCD1-021 | 7            | ENSG00000002549 | LAP3      | leucine aminopeptidase 3 [Source:HGNC Symbol;Acc:18449]                                          | 1.74                         |
| CPMCD1-021 | 7            | ENSG00000138496 | PARP9     | poly (ADP-ribose) polymerase family, member 9 [Source:HGNC Symbol;Acc:24118]                     | 1.29                         |
| CPMCD1-021 | 7            | ENSG00000115415 | STAT1     | signal transducer and activator of transcription 1, 91kDa [Source:HGNC Symbol;Acc:11362]         | 1.63                         |
| CPMCD1-021 | 7            | ENSG00000140105 | WARS      | tryptophanyl-tRNA synthetase [Source:HGNC Symbol;Acc:12729]                                      | 1.78                         |
| CPMCD1-022 | 3            | ENSG00000163823 | CCR1      | chemokine (C-C motif) receptor 1 [Source:HGNC Symbol;Acc:1602]                                   | 1.11                         |
| CPMCD1-022 | 3            | ENSG00000135636 | DYSF      | dysferlin, limb girdle muscular dystrophy 2B (autosomal recessive) [Source:HGNC Symbol;Acc:3097] | 1.43                         |
| CPMCD1-022 | 3            | ENSG00000171049 | FPR2      | formyl peptide receptor 2 [Source:HGNC Symbol;Acc:3827]                                          | 1.34                         |
| CPMCD1-023 | 4            | ENSG00000221963 | APOL6     | apolipoprotein L, 6 [Source:HGNC Symbol;Acc:14870]                                               | 0.92                         |
| CPMCD1-023 | 4            | ENSG00000168062 | BATF2     | basic leucine zipper transcription factor, ATF-like 2 [Source:HGNC Symbol;Acc:25163]             | 2.70                         |
| CPMCD1-023 | 4            | ENSG00000163840 | DTX3L     | deltex 3-like (Drosophila) [Source:HGNC Symbol;Acc:30323]                                        | 0.76                         |



| Cluster ID | Cluster Size | Gene ID         | Gene Name | Gene Description                                                                                                       | Log <sub>2</sub> Fold Change |
|------------|--------------|-----------------|-----------|------------------------------------------------------------------------------------------------------------------------|------------------------------|
| CPMCD1-023 | 4            | ENSG00000168394 | TAP1      | transporter 1, ATP-binding cassette, sub-family B (MDR/TAP) [Source:HGNC Symbol;Acc:43]                                | 0.73                         |
| CPMCD1-024 | 2            | ENSG00000166527 | CLEC4D    | C-type lectin domain family 4, member D [Source:HGNC Symbol;Acc:14554]                                                 | 0.76                         |
| CPMCD1-024 | 2            | ENSG00000166523 | CLEC4E    | C-type lectin domain family 4, member E [Source:HGNC Symbol;Acc:14555]                                                 | 0.63                         |
| CPMCD1-025 | 2            | ENSG00000140379 | BCL2A1    | BCL2-related protein A1 [Source:HGNC Symbol;Acc:991]                                                                   | 1.00                         |
| CPMCD1-025 | 2            | ENSG00000197272 | IL27      | interleukin 27 [Source:HGNC Symbol;Acc:19157]                                                                          | 2.05                         |
| CPMCD1-026 | 2            | ENSG00000014257 | ACPP      | acid phosphatase, prostate [Source:HGNC Symbol;Acc:125]                                                                | 0.70                         |
| CPMCD1-026 | 2            | ENSG00000146373 | RNF217    | ring finger protein 217 [Source:HGNC Symbol;Acc:21487]                                                                 | 0.76                         |
| CPMCD1-027 | 2            | ENSG00000155130 | MARCKS    | myristoylated alanine-rich protein kinase C substrate [Source:HGNC Symbol;Acc:6759]                                    | 0.86                         |
| CPMCD1-027 | 2            | ENSG00000137767 | SQRDL     | sulfide quinone reductase-like (yeast) [Source:HGNC Symbol;Acc:20390]                                                  | 0.73                         |
| CPMCD1-028 | 3            | ENSG00000171860 | C3AR1     | complement component 3a receptor 1 [Source:HGNC Symbol;Acc:1319]                                                       | 0.84                         |
| CPMCD1-028 | 3            | ENSG00000188641 | DPYD      | dihydropyrimidine dehydrogenase [Source:HGNC Symbol;Acc:3012]                                                          | 0.75                         |
| CPMCD1-028 | 3            | ENSG00000136040 | PLXNC1    | plexin C1 [Source:HGNC Symbol;Acc:9106]                                                                                | 0.60                         |
| CPMCD1-029 | 5            | ENSG00000137965 | IFI44     | interferon-induced protein 44 [Source:HGNC Symbol;Acc:16938]                                                           | 1.01                         |
| CPMCD1-029 | 5            | ENSG00000137959 | IFI44L    | interferon-induced protein 44-like [Source:HGNC Symbol;Acc:17817]                                                      | 1.30                         |
| CPMCD1-029 | 5            | ENSG00000173193 | PARP14    | poly (ADP-ribose) polymerase family, member 14 [Source:HGNC Symbol;Acc:29232]                                          | 0.85                         |
| CPMCD1-029 | 5            | ENSG00000020577 | SAMD4A    | sterile alpha motif domain containing 4A [Source:HGNC Symbol;Acc:23023]                                                | 1.25                         |
| CPMCD1-029 | 5            | ENSG00000132530 | XAF1      | XIAP associated factor 1 [Source:HGNC Symbol;Acc:30932]                                                                | 0.81                         |
| CPMCD1-030 | 2            | ENSG00000100336 | APOL4     | apolipoprotein L, 4 [Source:HGNC Symbol;Acc:14867]                                                                     | 1.41                         |
| CPMCD1-030 | 2            | ENSG00000170525 | PFKFB3    | 6-phosphofructo-2-kinase/fructose-2,6-biphosphatase 3 [Source:HGNC Symbol;Acc:8874]                                    | 0.79                         |
| CPMCD1-031 | 3            | ENSG00000182022 | CHST15    | carbohydrate (N-acetylgalactosamine 4-sulfate 6-O) sulfotransferase 15 [Source:HGNC Symbol;Acc:18137]                  | 0.65                         |
| CPMCD1-031 | 3            | ENSG00000104093 | DMXL2     | Dmx-like 2 [Source:HGNC Symbol;Acc:2938]                                                                               | 0.71                         |
| CPMCD1-031 | 3            | ENSG00000136868 | SLC31A1   | solute carrier family 31 (copper transporters), member 1 [Source:HGNC Symbol;Acc:11016]                                | 0.66                         |
| CPMCD1-032 | 3            | ENSG00000146592 | CREB5     | cAMP responsive element binding protein 5 [Source:HGNC Symbol;Acc:16844]                                               | 0.79                         |
| CPMCD1-032 | 3            | ENSG00000204577 | LILRB3    | leukocyte immunoglobulin-like receptor, subfamily B (with TM and ITIM domains), member 3 [Source:HGNC Symbol;Acc:6607] | 0.73                         |
| CPMCD1-032 | 3            | ENSG00000167207 | NOD2      | nucleotide-binding oligomerization domain containing 2 [Source:HGNC Symbol;Acc:5331]                                   | 0.61                         |
| CPMCD1-033 | 3            | ENSG00000196743 | GM2A      | GM2 ganglioside activator [Source:HGNC Symbol;Acc:4367]                                                                | 0.76                         |
| CPMCD1-033 | 3            | ENSG00000186818 | LILRB4    | leukocyte immunoglobulin-like receptor, subfamily B (with TM and ITIM domains), member 4 [Source:HGNC Symbol;Acc:6608] | 0.87                         |

| Cluster ID | Cluster Size | Gene ID         | Gene Name  | Gene Description                                                                                                 | Log <sub>2</sub> Fold Change |
|------------|--------------|-----------------|------------|------------------------------------------------------------------------------------------------------------------|------------------------------|
| CPMCD1-033 | 3            | ENSG00000130202 | PVRL2      | poliovirus receptor-related 2 (herpesvirus entry mediator B) [Source:HGNC Symbol;Acc:9707]                       | 0.97                         |
| CPMCD1-034 | 5            | ENSG00000128383 | APOBEC3A   | apolipoprotein B mRNA editing enzyme, catalytic polypeptide-like 3A [Source:HGNC Symbol;Acc:17343]               | 1.20                         |
| CPMCD1-034 | 5            | ENSG00000173110 | HSPA6      | heat shock 70kDa protein 6 (HSP70B) [Source:HGNC Symbol;Acc:5239]                                                | 1.08                         |
| CPMCD1-034 | 5            | ENSG00000089127 | OAS1       | 2',5'-oligoadenylate synthetase 1, 40/46kDa [Source:HGNC Symbol;Acc:8086]                                        | 0.88                         |
| CPMCD1-034 | 5            | ENSG00000185339 | TCN2       | transcobalamin II [Source:HGNC Symbol;Acc:11653]                                                                 | 1.34                         |
| CPMCD1-034 | 5            | ENSG00000121858 | TNFSF10    | tumor necrosis factor (ligand) superfamily, member 10 [Source:HGNC Symbol;Acc:11925]                             | 1.23                         |
| CPMCD1-035 | 2            | ENSG00000242539 | AC007620.3 |                                                                                                                  | 0.93                         |
| CPMCD1-035 | 2            | ENSG00000114450 | GNB4       | guanine nucleotide binding protein (G protein), beta polypeptide 4 [Source:HGNC Symbol;Acc:20731]                | 0.82                         |
| CPMCD1-036 | 4            | ENSG00000134326 | CMPK2      | cytidine monophosphate (UMP-CMP) kinase 2, mitochondrial [Source:HGNC Symbol;Acc:27015]                          | 1.12                         |
| CPMCD1-036 | 4            | ENSG00000185745 | IFIT1      | interferon-induced protein with tetratricopeptide repeats 1 [Source:HGNC Symbol;Acc:5407]                        | 1.21                         |
| CPMCD1-036 | 4            | ENSG00000157601 | MX1        | myxovirus (influenza virus) resistance 1, interferon-inducible protein p78 (mouse) [Source:HGNC Symbol;Acc:7532] | 0.83                         |
| CPMCD1-036 | 4            | ENSG00000135114 | OASL       | 2'-5'-oligoadenylate synthetase-like [Source:HGNC Symbol;Acc:8090]                                               | 0.99                         |
| CPMCD1-037 | 4            | ENSG00000166002 | C11orf75   | chromosome 11 open reading frame 75 [Source:HGNC Symbol;Acc:24810]                                               | 1.01                         |
| CPMCD1-037 | 4            | ENSG00000204397 | CARD16     | caspase recruitment domain family, member 16 [Source:HGNC Symbol;Acc:33701]                                      | 0.65                         |
| CPMCD1-037 | 4            | ENSG00000137752 | CASP1      | caspase 1, apoptosis-related cysteine peptidase (interleukin 1, beta, convertase) [Source:HGNC Symbol;Acc:1499]  | 0.69                         |
| CPMCD1-037 | 4            | ENSG00000181631 | P2RY13     | purinergic receptor P2Y, G-protein coupled, 13 [Source:HGNC Symbol;Acc:4537]                                     | 0.94                         |
| CPMCD1-038 | 2            | ENSG00000169026 | MFSD7      | major facilitator superfamily domain containing 7 [Source:HGNC Symbol;Acc:26177]                                 | 0.61                         |
| CPMCD1-038 | 2            | ENSG00000074660 | SCARF1     | scavenger receptor class F, member 1 [Source:HGNC Symbol;Acc:16820]                                              | 0.67                         |
| CPMCD1-039 | 2            | ENSG00000152229 | PSTPIP2    | proline-serine-threonine phosphatase interacting protein 2 [Source:HGNC Symbol;Acc:9581]                         | 0.97                         |
| CPMCD1-039 | 2            | ENSG00000185215 | TNFAIP2    | tumor necrosis factor, alpha-induced protein 2 [Source:HGNC Symbol;Acc:11895]                                    | 0.68                         |
| CPMCD1-040 | 2            | ENSG00000253193 | FCGR1C     | Fc fragment of IgG, high affinity 1c, receptor (CD64) [Source:HGNC Symbol;Acc:3615]                              | 3.04                         |
| CPMCD1-040 | 2            | ENSG00000089041 | P2RX7      | purinergic receptor P2X, ligand-gated ion channel, 7 [Source:HGNC Symbol;Acc:8537]                               | 0.76                         |
| CPMCD1-041 | 2            | ENSG00000105835 | NAMPT      | nicotinamide phosphoribosyltransferase [Source:HGNC Symbol;Acc:30092]                                            | 1.06                         |
| CPMCD1-041 | 2            | ENSG00000229644 | NAMPTL     | nicotinamide phosphoribosyltransferase-like [Source:HGNC Symbol;Acc:17633]                                       | 0.91                         |
| CPMCD1-042 | 3            | ENSG00000135218 | CD36       | CD36 molecule (thrombospondin receptor) [Source:HGNC Symbol;Acc:1663]                                            | 0.78                         |

| Cluster ID | Cluster Size | Gene ID         | Gene Name     | Gene Description                                                                                              | <i>Log<sub>2</sub></i> Fold Change |
|------------|--------------|-----------------|---------------|---------------------------------------------------------------------------------------------------------------|------------------------------------|
| CPMCD1-042 | 3            | ENSG00000139132 | FGD4          | FYVE, RhoGEF and PH domain containing 4 [Source:HGNC Symbol;Acc:19125]                                        | 0.60                               |
| CPMCD1-042 | 3            | ENSG00000140090 | SLC24A4       | solute carrier family 24 (sodium/potassium/calcium exchanger), member 4 [Source:HGNC Symbol;Acc:10978]        | 0.61                               |
| CPMCD1-043 | 4            | ENSG00000179921 | GPBAR1        | G protein-coupled bile acid receptor 1 [Source:HGNC Symbol;Acc:19680]                                         | 0.62                               |
| CPMCD1-043 | 4            | ENSG00000096968 | JAK2          | Janus kinase 2 [Source:HGNC Symbol;Acc:6192]                                                                  | 0.82                               |
| CPMCD1-043 | 4            | ENSG00000187164 | KIAA1598      | KIAA1598 [Source:HGNC Symbol;Acc:29319]                                                                       | 0.59                               |
| CPMCD1-043 | 4            | ENSG00000175471 | MCTP1         | multiple C2 domains, transmembrane 1 [Source:HGNC Symbol;Acc:26183]                                           | 0.63                               |
| CPMCD1-044 | 4            | ENSG00000179044 | EXOC3L1       | exocyst complex component 3-like 1 [Source:HGNC Symbol;Acc:27540]                                             | 1.69                               |
| CPMCD1-044 | 4            | ENSG00000134470 | IL15RA        | interleukin 15 receptor, alpha [Source:HGNC Symbol;Acc:5978]                                                  | 0.88                               |
| CPMCD1-044 | 4            | ENSG00000185507 | IRF7          | interferon regulatory factor 7 [Source:HGNC Symbol;Acc:6122]                                                  | 0.70                               |
| CPMCD1-044 | 4            | ENSG00000064932 | SBNO2         | strawberry notch homolog 2 (Drosophila) [Source:HGNC Symbol;Acc:29158]                                        | 0.64                               |
| CPMCD1-045 | 2            | ENSG00000124762 | CDKN1A        | cyclin-dependent kinase inhibitor 1A (p21, Cip1) [Source:HGNC Symbol;Acc:1784]                                | 0.72                               |
| CPMCD1-045 | 2            | ENSG00000162614 | NEXN          | nexilin (F actin binding protein) [Source:HGNC Symbol;Acc:29557]                                              | 1.07                               |
| CPMCD1-046 | 4            | ENSG00000161921 | CXCL16        | chemokine (C-X-C motif) ligand 16 [Source:HGNC Symbol;Acc:16642]                                              | 0.65                               |
| CPMCD1-046 | 4            | ENSG00000187116 | LILRA5        | leukocyte immunoglobulin-like receptor, subfamily A (with TM domain), member 5 [Source:HGNC Symbol;Acc:16309] | 0.98                               |
| CPMCD1-046 | 4            | ENSG00000254470 | RP11-770G2.3  |                                                                                                               | 0.64                               |
| CPMCD1-046 | 4            | ENSG00000122862 | SRGN          | serglycin [Source:HGNC Symbol;Acc:9361]                                                                       | 0.64                               |
| CPMCD1-047 | 4            | ENSG00000121807 | CCR2          | chemokine (C-C motif) receptor 2 [Source:HGNC Symbol;Acc:1603]                                                | 0.70                               |
| CPMCD1-047 | 4            | ENSG00000139318 | DUSP6         | dual specificity phosphatase 6 [Source:HGNC Symbol;Acc:3072]                                                  | 0.84                               |
| CPMCD1-047 | 4            | ENSG00000136689 | IL1RN         | interleukin 1 receptor antagonist [Source:HGNC Symbol;Acc:6000]                                               | 0.81                               |
| CPMCD1-047 | 4            | ENSG00000135363 | LMO2          | LIM domain only 2 (rhombotin-like 1) [Source:HGNC Symbol;Acc:6642]                                            | 0.72                               |
| CPMCD1-048 | 3            | ENSG00000137757 | CASP5         | caspase 5, apoptosis-related cysteine peptidase [Source:HGNC Symbol;Acc:1506]                                 | 0.88                               |
| CPMCD1-048 | 3            | ENSG00000224397 | RP11-290F20.3 |                                                                                                               | 0.63                               |
| CPMCD1-048 | 3            | ENSG00000248429 | RP11-597D13.9 |                                                                                                               | 0.65                               |
| CPMCD1-049 | 2            | ENSG00000136630 | HLX           | H2.0-like homeobox [Source:HGNC Symbol;Acc:4978]                                                              | 0.61                               |
| CPMCD1-049 | 2            | ENSG00000124731 | TREM1         | triggering receptor expressed on myeloid cells 1 [Source:HGNC Symbol;Acc:17760]                               | 0.66                               |
| CPMCD1-050 | 3            | ENSG00000185168 | C17orf55      | chromosome 17 open reading frame 55 [Source:HGNC Symbol;Acc:26816]                                            | 0.66                               |
| CPMCD1-050 | 3            | ENSG00000123700 | KCNJ2         | potassium inwardly-rectifying channel, subfamily J, member 2 [Source:HGNC Symbol;Acc:6263]                    | 1.00                               |

| Cluster ID | Cluster Size | Gene ID         | Gene Name    | Gene Description                                                                        | Log <sub>2</sub> Fold Change |
|------------|--------------|-----------------|--------------|-----------------------------------------------------------------------------------------|------------------------------|
| CPMCD1-050 | 3            | ENSG00000137462 | TLR2         | toll-like receptor 2 [Source:HGNC Symbol;Acc:11848]                                     | 0.66                         |
| CPMCD1-051 | 5            | ENSG00000168615 | ADAM9        | ADAM metallopeptidase domain 9 [Source:HGNC Symbol;Acc:216]                             | 0.65                         |
| CPMCD1-051 | 5            | ENSG00000138061 | CYP1B1       | cytochrome P450, family 1, subfamily B, polypeptide 1 [Source:HGNC Symbol;Acc:2597]     | 0.64                         |
| CPMCD1-051 | 5            | ENSG00000002933 | TMEM176A     | transmembrane protein 176A [Source:HGNC Symbol;Acc:24930]                               | 0.65                         |
| CPMCD1-051 | 5            | ENSG00000106565 | TMEM176B     | transmembrane protein 176B [Source:HGNC Symbol;Acc:29596]                               | 0.69                         |
| CPMCD1-051 | 5            | ENSG00000038427 | VCAN         | versican [Source:HGNC Symbol;Acc:2464]                                                  | 0.76                         |
| CPMCD1-052 | 3            | ENSG00000038945 | MSR1         | macrophage scavenger receptor 1 [Source:HGNC Symbol;Acc:7376]                           | 1.18                         |
| CPMCD1-052 | 3            | ENSG00000158714 | SLAMF8       | SLAM family member 8 [Source:HGNC Symbol;Acc:21391]                                     | 1.25                         |
| CPMCD1-052 | 3            | ENSG00000136867 | SLC31A2      | solute carrier family 31 (copper transporters), member 2 [Source:HGNC Symbol;Acc:11017] | 1.14                         |
| CPMCD1-053 | 4            | ENSG00000148926 | ADM          | adrenomedullin [Source:HGNC Symbol;Acc:259]                                             | 1.23                         |
| CPMCD1-053 | 4            | ENSG00000257017 | HP           | haptoglobin [Source:HGNC Symbol;Acc:5141]                                               | 1.15                         |
| CPMCD1-053 | 4            | ENSG00000171236 | LRG1         | leucine-rich alpha-2-glycoprotein 1 [Source:HGNC Symbol;Acc:29480]                      | 0.85                         |
| CPMCD1-053 | 4            | ENSG00000184557 | SOCS3        | suppressor of cytokine signaling 3 [Source:HGNC Symbol;Acc:19391]                       | 1.76                         |
| CPMCD1-054 | 2            | ENSG00000131203 | IDO1         | indoleamine 2,3-dioxygenase 1 [Source:HGNC Symbol;Acc:6059]                             | 2.04                         |
| CPMCD1-054 | 2            | ENSG00000108387 | SEPT4        | septin 4 [Source:HGNC Symbol;Acc:9165]                                                  | 0.89                         |
| CPMCD1-055 | 2            | ENSG00000152380 | FAM151B      | family with sequence similarity 151, member B [Source:HGNC Symbol;Acc:33716]            | 0.66                         |
| CPMCD1-055 | 2            | ENSG00000171729 | TMEM51       | transmembrane protein 51 [Source:HGNC Symbol;Acc:25488]                                 | 0.86                         |
| CPMCD1-056 | 4            | ENSG00000163568 | AIM2         | absent in melanoma 2 [Source:HGNC Symbol;Acc:357]                                       | 0.92                         |
| CPMCD1-056 | 4            | ENSG00000104951 | IL411        | interleukin 4 induced 1 [Source:HGNC Symbol;Acc:19094]                                  | 0.62                         |
| CPMCD1-056 | 4            | ENSG00000185499 | MUC1         | mucin 1, cell surface associated [Source:HGNC Symbol;Acc:7508]                          | 0.90                         |
| CPMCD1-056 | 4            | ENSG00000138670 | RASGEF1B     | RasGEF domain family, member 1B [Source:HGNC Symbol;Acc:24881]                          | 0.83                         |
| CPMCD1-057 | 2            | ENSG00000135540 | NHSL1        | NHS-like 1 [Source:HGNC Symbol;Acc:21021]                                               | 0.62                         |
| CPMCD1-057 | 2            | ENSG00000238000 | RP11-274E7.2 |                                                                                         | 0.93                         |
| CPMCD1-058 | 2            | ENSG00000169122 | FAM110B      | family with sequence similarity 110, member B [Source:HGNC Symbol;Acc:28587]            | 0.68                         |
| CPMCD1-058 | 2            | ENSG00000133687 | TMTC1        | transmembrane and tetratricopeptide repeat containing 1 [Source:HGNC Symbol;Acc:24099]  | 0.64                         |
| CPMCD1-059 | 5            | ENSG00000029153 | ARNTL2       | aryl hydrocarbon receptor nuclear translocator-like 2 [Source:HGNC Symbol;Acc:18984]    | 1.49                         |
| CPMCD1-059 | 5            | ENSG00000174749 | C4orf32      | chromosome 4 open reading frame 32 [Source:HGNC Symbol;Acc:26813]                       | 0.67                         |
| CPMCD1-059 | 5            | ENSG00000203814 | HIST2H2BF    | histone cluster 2, H2bf [Source:HGNC Symbol;Acc:24700]                                  | 1.46                         |
| CPMCD1-059 | 5            | ENSG00000242324 | RP4-576H24.2 |                                                                                         | 0.96                         |

| Cluster ID | Cluster Size | Gene ID         | Gene Name       | Gene Description                                                                                                           | Log <sub>2</sub> Fold Change |
|------------|--------------|-----------------|-----------------|----------------------------------------------------------------------------------------------------------------------------|------------------------------|
| CPMCD1-059 | 5            | ENSG00000130589 | RP4-697K14.7    | Peroxisomal proliferator-activated receptor A-interacting complex 285 kDa protein [Source:UniProtKB/Swiss-Prot;Acc:Q9BYK8] | 0.66                         |
| CPMCD1-060 | 3            | ENSG00000186594 | C17orf91        | chromosome 17 open reading frame 91 [Source:HGNC Symbol;Acc:28219]                                                         | 0.76                         |
| CPMCD1-060 | 3            | ENSG00000246430 | RP11-16M8.2     |                                                                                                                            | 0.95                         |
| CPMCD1-060 | 3            | ENSG00000141497 | ZMYND15         | zinc finger, MYND-type containing 15 [Source:HGNC Symbol;Acc:20997]                                                        | 0.65                         |
| CPMCD1-061 | 4            | ENSG00000151693 | ASAP2           | ArfGAP with SH3 domain, ankyrin repeat and PH domain 2 [Source:HGNC Symbol;Acc:2721]                                       | 0.88                         |
| CPMCD1-061 | 4            | ENSG00000128512 | DOCK4           | dedicator of cytokinesis 4 [Source:HGNC Symbol;Acc:19192]                                                                  | 0.80                         |
| CPMCD1-061 | 4            | ENSG00000237476 | XXbac-B135H6.15 |                                                                                                                            | 0.59                         |
| CPMCD1-061 | 4            | ENSG00000242779 | ZNF702P         | zinc finger protein 702, pseudogene [Source:HGNC Symbol;Acc:25775]                                                         | 0.60                         |
| CPMCD1-062 | 2            | ENSG00000232871 | AC008888.7      | secretory blood group 1 (SEC1), non-coding RNA [Source:RefSeq DNA;Acc:NR_04401]                                            | -0.65                        |
| CPMCD1-062 | 2            | ENSG00000136378 | ADAMTS7         | ADAM metalloproteinase with thrombospondin type 1 motif, 7 [Source:HGNC Symbol;Acc:223]                                    | -0.71                        |
| CPMCD1-063 | 4            | ENSG00000205018 | AC092384.1      | cDNA FLJ26728 fis, clone PNC06635 [Source:UniProtKB/TrEMBL;Acc:Q6ZP14]                                                     | 0.69                         |
| CPMCD1-063 | 4            | ENSG00000120129 | DUSP1           | dual specificity phosphatase 1 [Source:HGNC Symbol;Acc:3064]                                                               | 0.71                         |
| CPMCD1-063 | 4            | ENSG00000170345 | FOS             | FBJ murine osteosarcoma viral oncogene homolog [Source:HGNC Symbol;Acc:3796]                                               | 0.61                         |
| CPMCD1-063 | 4            | ENSG00000238057 | ZEB2-AS1        | ZEB2 antisense RNA 1 (non-protein coding) [Source:HGNC Symbol;Acc:37149]                                                   | 0.59                         |
| CPMCD1-064 | 5            | ENSG00000226423 | AC093642.4      |                                                                                                                            | -0.61                        |
| CPMCD1-064 | 5            | ENSG00000100346 | CACNA1I         | calcium channel, voltage-dependent, T type, alpha 1I subunit [Source:HGNC Symbol;Acc:1396]                                 | -0.65                        |
| CPMCD1-064 | 5            | ENSG00000140545 | MFGE8           | milk fat globule-EGF factor 8 protein [Source:HGNC Symbol;Acc:7036]                                                        | -0.61                        |
| CPMCD1-064 | 5            | ENSG00000183691 | NOG             | noggin [Source:HGNC Symbol;Acc:7866]                                                                                       | -0.62                        |
| CPMCD1-064 | 5            | ENSG00000091129 | NRCAM           | neuronal cell adhesion molecule [Source:HGNC Symbol;Acc:7994]                                                              | -0.89                        |
| CPMCD1-065 | 4            | ENSG00000123685 | BATF3           | basic leucine zipper transcription factor, ATF-like 3 [Source:HGNC Symbol;Acc:28915]                                       | 0.61                         |
| CPMCD1-065 | 4            | ENSG00000173372 | C1QA            | complement component 1, q subcomponent, A chain [Source:HGNC Symbol;Acc:1241]                                              | 0.66                         |
| CPMCD1-065 | 4            | ENSG00000173369 | C1QB            | complement component 1, q subcomponent, B chain [Source:HGNC Symbol;Acc:1242]                                              | 1.35                         |
| CPMCD1-065 | 4            | ENSG00000121797 | CCRL2           | chemokine (C-C motif) receptor-like 2 [Source:HGNC Symbol;Acc:1612]                                                        | 0.65                         |
| CPMCD1-066 | 5            | ENSG00000172653 | C17orf66        | chromosome 17 open reading frame 66 [Source:HGNC Symbol;Acc:26548]                                                         | -0.70                        |
| CPMCD1-066 | 5            | ENSG00000130635 | COL5A1          | collagen, type V, alpha 1 [Source:HGNC Symbol;Acc:2209]                                                                    | -0.61                        |
| CPMCD1-066 | 5            | ENSG00000080573 | COL5A3          | collagen, type V, alpha 3 [Source:HGNC Symbol;Acc:14864]                                                                   | -0.67                        |

| Cluster ID | Cluster Size | Gene ID         | Gene Name     | Gene Description                                                                        | Log <sub>2</sub> Fold Change |
|------------|--------------|-----------------|---------------|-----------------------------------------------------------------------------------------|------------------------------|
| CPMCD1-066 | 5            | ENSG00000237248 | RP11-118B22.2 |                                                                                         | -0.59                        |
| CPMCD1-066 | 5            | ENSG00000256069 | RP11-118B22.6 |                                                                                         | -0.67                        |
| CPMCD1-067 | 3            | ENSG00000251948 | AC092279.1    |                                                                                         | 1.45                         |
| CPMCD1-067 | 3            | ENSG00000244230 | AL355679.1    |                                                                                         | 0.87                         |
| CPMCD1-067 | 3            | ENSG00000244642 | AP005717.1    |                                                                                         | 0.66                         |
| CPMCD1-068 | 2            | ENSG00000188010 | MORN2         | MORN repeat containing 2 [Source:HGNC Symbol;Acc:30166]                                 | 0.60                         |
| CPMCD1-068 | 2            | ENSG00000127564 | PKMYT1        | protein kinase, membrane associated tyrosine/threonine 1 [Source:HGNC Symbol;Acc:29650] | 0.68                         |
| CPMCD1-069 | 2            | ENSG00000197927 | C2orf27A      | chromosome 2 open reading frame 27A [Source:HGNC Symbol;Acc:25077]                      | -0.62                        |
| CPMCD1-069 | 2            | ENSG00000116254 | CHD5          | chromodomain helicase DNA binding protein 5 [Source:HGNC Symbol;Acc:16816]              | -0.62                        |

**Table A9:** Significant gene clusters (RNA-Seq, PBMC, Day 1)

| Cluster ID    | Cluster Size | Gene ID         | Gene Name | Gene Description                                                                                           |
|---------------|--------------|-----------------|-----------|------------------------------------------------------------------------------------------------------------|
| CPMCD1D28-001 | 2            | ENSG00000002549 | LAP3      | leucine aminopeptidase 3 [Source:HGNC Symbol;Acc:18449]                                                    |
| CPMCD1D28-001 | 2            | ENSG00000140105 | WARS      | tryptophanyl-tRNA synthetase [Source:HGNC Symbol;Acc:12729]                                                |
| CPMCD1D28-002 | 3            | ENSG00000163221 | S100A12   | S100 calcium binding protein A12 [Source:HGNC Symbol;Acc:10489]                                            |
| CPMCD1D28-002 | 3            | ENSG00000143546 | S100A8    | S100 calcium binding protein A8 [Source:HGNC Symbol;Acc:10498]                                             |
| CPMCD1D28-002 | 3            | ENSG00000163220 | S100A9    | S100 calcium binding protein A9 [Source:HGNC Symbol;Acc:10499]                                             |
| CPMCD1D28-003 | 2            | ENSG00000119922 | IFIT2     | interferon-induced protein with tetratricopeptide repeats 2 [Source:HGNC Symbol;Acc:5409]                  |
| CPMCD1D28-003 | 2            | ENSG00000119917 | IFIT3     | interferon-induced protein with tetratricopeptide repeats 3 [Source:HGNC Symbol;Acc:5411]                  |
| CPMCD1D28-004 | 3            | ENSG00000164125 | FAM198B   | family with sequence similarity 198, member B [Source:HGNC Symbol;Acc:25312]                               |
| CPMCD1D28-004 | 3            | ENSG00000163694 | RBM47     | RNA binding motif protein 47 [Source:HGNC Symbol;Acc:30358]                                                |
| CPMCD1D28-004 | 3            | ENSG00000134243 | SORT1     | sortilin 1 [Source:HGNC Symbol;Acc:11186]                                                                  |
| CPMCD1D28-005 | 3            | ENSG00000158517 | NCF1      | neutrophil cytosolic factor 1 [Source:HGNC Symbol;Acc:7660]                                                |
| CPMCD1D28-005 | 3            | ENSG00000182487 | NCF1B     | neutrophil cytosolic factor 1B pseudogene [Source:HGNC Symbol;Acc:32522]                                   |
| CPMCD1D28-005 | 3            | ENSG00000165178 | NCF1C     | neutrophil cytosolic factor 1C pseudogene [Source:HGNC Symbol;Acc:32523]                                   |
| CPMCD1D28-006 | 2            | ENSG00000244682 | FCGR2C    | Fc fragment of IgG, low affinity IIc, receptor for (CD32) (gene/pseudogene) [Source:HGNC Symbol;Acc:15626] |
| CPMCD1D28-006 | 2            | ENSG00000225217 | HSPA7     | heat shock 70kDa protein 7 (HSP70B) [Source:HGNC Symbol;Acc:5240]                                          |
| CPMCD1D28-007 | 2            | ENSG00000105835 | NAMPT     | nicotinamide phosphoribosyltransferase [Source:HGNC Symbol;Acc:30092]                                      |

| Cluster ID    | Cluster Size | Gene ID         | Gene Name | Gene Description                                                                                   |
|---------------|--------------|-----------------|-----------|----------------------------------------------------------------------------------------------------|
| CPMCD1D28-007 | 2            | ENSG00000229644 | NAMPTL    | nicotinamide phosphoribosyltransferase-like [Source:HGNC Symbol;Acc:17633]                         |
| CPMCD1D28-008 | 7            | ENSG00000166002 | C11orf75  | chromosome 11 open reading frame 75 [Source:HGNC Symbol;Acc:24810]                                 |
| CPMCD1D28-008 | 7            | ENSG00000103642 | LACTB     | lactamase, beta [Source:HGNC Symbol;Acc:16468]                                                     |
| CPMCD1D28-008 | 7            | ENSG00000087253 | LPCAT2    | lysophosphatidylcholine acyltransferase 2 [Source:HGNC Symbol;Acc:26032]                           |
| CPMCD1D28-008 | 7            | ENSG00000188906 | LRRK2     | leucine-rich repeat kinase 2 [Source:HGNC Symbol;Acc:18618]                                        |
| CPMCD1D28-008 | 7            | ENSG00000183023 | SLC8A1    | solute carrier family 8 (sodium/calcium exchanger), member 1 [Source:HGNC Symbol;Acc:11068]        |
| CPMCD1D28-008 | 7            | ENSG00000086300 | SNX10     | sorting nexin 10 [Source:HGNC Symbol;Acc:14974]                                                    |
| CPMCD1D28-008 | 7            | ENSG00000105967 | TFEC      | transcription factor EC [Source:HGNC Symbol;Acc:11754]                                             |
| CPMCD1D28-009 | 2            | ENSG00000198019 | FCGR1B    | Fc fragment of IgG, high affinity lb, receptor (CD64) [Source:HGNC Symbol;Acc:3614]                |
| CPMCD1D28-009 | 2            | ENSG00000253193 | FCGR1C    | Fc fragment of IgG, high affinity lc, receptor (CD64) [Source:HGNC Symbol;Acc:3615]                |
| CPMCD1D28-010 | 2            | ENSG00000002933 | TMEM176A  | transmembrane protein 176A [Source:HGNC Symbol;Acc:24930]                                          |
| CPMCD1D28-010 | 2            | ENSG00000106565 | TMEM176B  | transmembrane protein 176B [Source:HGNC Symbol;Acc:29596]                                          |
| CPMCD1D28-011 | 2            | ENSG00000100336 | APOL4     | apolipoprotein L, 4 [Source:HGNC Symbol;Acc:14867]                                                 |
| CPMCD1D28-011 | 2            | ENSG00000183762 | KREMEN1   | kringle containing transmembrane protein 1 [Source:HGNC Symbol;Acc:17550]                          |
| CPMCD1D28-012 | 15           | ENSG00000128383 | APOBEC3A  | apolipoprotein B mRNA editing enzyme, catalytic polypeptide-like 3A [Source:HGNC Symbol;Acc:17343] |
| CPMCD1D28-012 | 15           | ENSG00000169245 | CXCL10    | chemokine (C-X-C motif) ligand 10 [Source:HGNC Symbol;Acc:10637]                                   |
| CPMCD1D28-012 | 15           | ENSG00000133106 | EPST11    | epithelial stromal interaction 1 (breast) [Source:HGNC Symbol;Acc:16465]                           |
| CPMCD1D28-012 | 15           | ENSG00000068079 | IFI35     | interferon-induced protein 35 [Source:HGNC Symbol;Acc:5399]                                        |
| CPMCD1D28-012 | 15           | ENSG00000096968 | JAK2      | Janus kinase 2 [Source:HGNC Symbol;Acc:6192]                                                       |
| CPMCD1D28-012 | 15           | ENSG00000138119 | MYOF      | myoferlin [Source:HGNC Symbol;Acc:3656]                                                            |
| CPMCD1D28-012 | 15           | ENSG00000177989 | ODF3B     | outer dense fiber of sperm tails 3B [Source:HGNC Symbol;Acc:34388]                                 |
| CPMCD1D28-012 | 15           | ENSG00000173193 | PARP14    | poly (ADP-ribose) polymerase family, member 14 [Source:HGNC Symbol;Acc:29232]                      |
| CPMCD1D28-012 | 15           | ENSG00000138496 | PARP9     | poly (ADP-ribose) polymerase family, member 9 [Source:HGNC Symbol;Acc:24118]                       |
| CPMCD1D28-012 | 15           | ENSG00000020577 | SAMD4A    | sterile alpha motif domain containing 4A [Source:HGNC Symbol;Acc:23023]                            |
| CPMCD1D28-012 | 15           | ENSG00000177409 | SAMD9L    | sterile alpha motif domain containing 9-like [Source:HGNC Symbol;Acc:1349]                         |
| CPMCD1D28-012 | 15           | ENSG00000130489 | SCO2      | SCO cytochrome oxidase deficient homolog 2 (yeast) [Source:HGNC Symbol;Acc:10604]                  |
| CPMCD1D28-012 | 15           | ENSG00000149131 | SERPING1  | serpin peptidase inhibitor, clade G (C1 inhibitor), member 1 [Source:HGNC Symbol;Acc:1228]         |
| CPMCD1D28-012 | 15           | ENSG00000170581 | STAT2     | signal transducer and activator of transcription 2, 113kDa [Source:HGNC Symbol;Acc:11363]          |
| CPMCD1D28-012 | 15           | ENSG00000025708 | TYMP      | thymidine phosphorylase [Source:HGNC Symbol;Acc:3148]                                              |

| Cluster ID    | Cluster Size | Gene ID         | Gene Name | Gene Description                                                                                                       |
|---------------|--------------|-----------------|-----------|------------------------------------------------------------------------------------------------------------------------|
| CPMCD1D28-013 | 2            | ENSG00000120129 | DUSP1     | dual specificity phosphatase 1 [Source:HGNC Symbol;Acc:3064]                                                           |
| CPMCD1D28-013 | 2            | ENSG00000170345 | FOS       | FBJ murine osteosarcoma viral oncogene homolog [Source:HGNC Symbol;Acc:3796]                                           |
| CPMCD1D28-014 | 9            | ENSG00000143382 | ADAMTSL4  | ADAMTS-like 4 [Source:HGNC Symbol;Acc:19706]                                                                           |
| CPMCD1D28-014 | 9            | ENSG00000173110 | HSPA6     | heat shock 70kDa protein 6 (HSP70B') [Source:HGNC Symbol;Acc:5239]                                                     |
| CPMCD1D28-014 | 9            | ENSG00000244482 | LILRA6    | leukocyte immunoglobulin-like receptor, subfamily A (with TM domain), member 6 [Source:HGNC Symbol;Acc:15495]          |
| CPMCD1D28-014 | 9            | ENSG00000104972 | LILRB1    | leukocyte immunoglobulin-like receptor, subfamily B (with TM and ITIM domains), member 1 [Source:HGNC Symbol;Acc:6605] |
| CPMCD1D28-014 | 9            | ENSG00000131042 | LILRB2    | leukocyte immunoglobulin-like receptor, subfamily B (with TM and ITIM domains), member 2 [Source:HGNC Symbol;Acc:6606] |
| CPMCD1D28-014 | 9            | ENSG00000105609 | LILRB5    | leukocyte immunoglobulin-like receptor, subfamily B (with TM and ITIM domains), member 5 [Source:HGNC Symbol;Acc:6609] |
| CPMCD1D28-014 | 9            | ENSG00000169026 | MFSD7     | major facilitator superfamily domain containing 7 [Source:HGNC Symbol;Acc:26177]                                       |
| CPMCD1D28-014 | 9            | ENSG00000161643 | SIGLEC16  | sialic acid binding Ig-like lectin 16 (gene/pseudogene) [Source:HGNC Symbol;Acc:24851]                                 |
| CPMCD1D28-014 | 9            | ENSG00000180061 | TMEM150B  | transmembrane protein 150B [Source:HGNC Symbol;Acc:34415]                                                              |
| CPMCD1D28-015 | 12           | ENSG00000168615 | ADAM9     | ADAM metalloproteinase domain 9 [Source:HGNC Symbol;Acc:216]                                                           |
| CPMCD1D28-015 | 12           | ENSG00000181982 | CCDC149   | coiled-coil domain containing 149 [Source:HGNC Symbol;Acc:25405]                                                       |
| CPMCD1D28-015 | 12           | ENSG00000170458 | CD14      | CD14 molecule [Source:HGNC Symbol;Acc:1628]                                                                            |
| CPMCD1D28-015 | 12           | ENSG00000166527 | CLEC4D    | C-type lectin domain family 4, member D [Source:HGNC Symbol;Acc:14554]                                                 |
| CPMCD1D28-015 | 12           | ENSG00000166523 | CLEC4E    | C-type lectin domain family 4, member E [Source:HGNC Symbol;Acc:14555]                                                 |
| CPMCD1D28-015 | 12           | ENSG00000103196 | CRISPLD2  | cysteine-rich secretory protein LCCL domain containing 2 [Source:HGNC Symbol;Acc:25248]                                |
| CPMCD1D28-015 | 12           | ENSG00000138061 | CYP1B1    | cytochrome P450, family 1, subfamily B, polypeptide 1 [Source:HGNC Symbol;Acc:2597]                                    |
| CPMCD1D28-015 | 12           | ENSG00000134755 | DSC2      | desmocollin 2 [Source:HGNC Symbol;Acc:3036]                                                                            |
| CPMCD1D28-015 | 12           | ENSG00000115271 | GCA       | grancalcin, EF-hand calcium binding protein [Source:HGNC Symbol;Acc:15990]                                             |
| CPMCD1D28-015 | 12           | ENSG00000106780 | MEGF9     | multiple EGF-like-domains 9 [Source:HGNC Symbol;Acc:3234]                                                              |
| CPMCD1D28-015 | 12           | ENSG00000119457 | SLC46A2   | solute carrier family 46, member 2 [Source:HGNC Symbol;Acc:16055]                                                      |
| CPMCD1D28-015 | 12           | ENSG00000038427 | VCAN      | versican [Source:HGNC Symbol;Acc:2464]                                                                                 |
| CPMCD1D28-016 | 3            | ENSG00000100346 | CACNA1I   | calcium channel, voltage-dependent, T type, alpha 1I subunit [Source:HGNC Symbol;Acc:1396]                             |
| CPMCD1D28-016 | 3            | ENSG00000140545 | MFGE8     | milk fat globule-EGF factor 8 protein [Source:HGNC Symbol;Acc:7036]                                                    |
| CPMCD1D28-016 | 3            | ENSG00000091129 | NRCAM     | neuronal cell adhesion molecule [Source:HGNC Symbol;Acc:7994]                                                          |



| Cluster ID    | Cluster Size | Gene ID         | Gene Name     | Gene Description                                                                                             |
|---------------|--------------|-----------------|---------------|--------------------------------------------------------------------------------------------------------------|
| CPMCD1D28-017 | 7            | ENSG00000151726 | ACSL1         | acyl-CoA synthetase long-chain family member 1 [Source:HGNC Symbol;Acc:3569]                                 |
| CPMCD1D28-017 | 7            | ENSG00000140379 | BCL2A1        | BCL2-related protein A1 [Source:HGNC Symbol;Acc:991]                                                         |
| CPMCD1D28-017 | 7            | ENSG00000113916 | BCL6          | B-cell CLL/lymphoma 6 [Source:HGNC Symbol;Acc:1001]                                                          |
| CPMCD1D28-017 | 7            | ENSG00000125538 | IL1B          | interleukin 1, beta [Source:HGNC Symbol;Acc:5992]                                                            |
| CPMCD1D28-017 | 7            | ENSG00000223401 | RP11-211G3.2  |                                                                                                              |
| CPMCD1D28-017 | 7            | ENSG00000184988 | TMEM106A      | transmembrane protein 106A [Source:HGNC Symbol;Acc:28288]                                                    |
| CPMCD1D28-017 | 7            | ENSG00000173334 | TRIB1         | tribbles homolog 1 (Drosophila) [Source:HGNC Symbol;Acc:16891]                                               |
| CPMCD1D28-018 | 2            | ENSG00000237248 | RP11-118B22.2 |                                                                                                              |
| CPMCD1D28-018 | 2            | ENSG00000256069 | RP11-118B22.6 |                                                                                                              |
| CPMCD1D28-019 | 7            | ENSG00000206082 | AC010507.1    | Uncharacterized protein [Source:UniProtKB/TrEMBL;Acc:E7EMX1]                                                 |
| CPMCD1D28-019 | 7            | ENSG00000244758 | AC093627.6    |                                                                                                              |
| CPMCD1D28-019 | 7            | ENSG00000233013 | FAM157B       | family with sequence similarity 157, member B [Source:HGNC Symbol;Acc:34080]                                 |
| CPMCD1D28-019 | 7            | ENSG00000235373 | RP11-206L10.3 |                                                                                                              |
| CPMCD1D28-019 | 7            | ENSG00000240618 | RP11-206L10.5 |                                                                                                              |
| CPMCD1D28-019 | 7            | ENSG00000239906 | RP11-34P13.14 |                                                                                                              |
| CPMCD1D28-019 | 7            | ENSG00000237094 | RP4-669L17.10 |                                                                                                              |
| CPMCD1D28-020 | 2            | ENSG00000189127 | ANKRD34B      | ankyrin repeat domain 34B [Source:HGNC Symbol;Acc:33736]                                                     |
| CPMCD1D28-020 | 2            | ENSG00000079215 | SLC1A3        | solute carrier family 1 (glial high affinity glutamate transporter), member 3 [Source:HGNC Symbol;Acc:10941] |
| CPMCD1D28-021 | 3            | ENSG00000251948 | AC092279.1    |                                                                                                              |
| CPMCD1D28-021 | 3            | ENSG00000244230 | AL355679.1    |                                                                                                              |
| CPMCD1D28-021 | 3            | ENSG00000244642 | AP005717.1    |                                                                                                              |

**Table A10:** Significant gene clusters (RNA-Seq, PBMC, Day 1-28)

| Category Type                         | Categories | Distinct #Genes In Sets | Median #Genes Per Set |
|---------------------------------------|------------|-------------------------|-----------------------|
| MSigDB BioCarta Pathways              | 217        | 1228                    | 18                    |
| MSigDB Chemical/Genetic Perturbations | 3398       | 18288                   | 44                    |
| MSigDB GO Biological Processes        | 825        | 5914                    | 26                    |
| MSigDB GO Cellular Components         | 233        | 5065                    | 27                    |
| MSigDB GO Molecular Functions         | 396        | 5108                    | 26                    |
| MSigDB Immunologic Signatures         | 1910       | 17782                   | 193                   |
| KEGG Modules                          | 162        | 1075                    | 6                     |
| KEGG Pathways                         | 286        | 6107                    | 58                    |
| MSigDB Reactome Pathways              | 674        | 5595                    | 26                    |

| Category Type | Categories | Distinct<br>#Genes<br>In Sets | Median<br>#Genes<br>Per Set |
|---------------|------------|-------------------------------|-----------------------------|
|---------------|------------|-------------------------------|-----------------------------|

**Table A11:** Overview of gene sets used for the enrichment analysis (RNA-Seq).

| Cell Type (Study Visit Day) | KEGGP<br>n/N(%) | KEGGM<br>n/N(%) | GOBP<br>n/N(%) | GOCC<br>n/N(%) | GOMF<br>n/N(%) | REACP<br>n/N(%) | BIOCP<br>n/N(%) | CHEMG<br>n/N(%) | IMMO<br>n/N(%) |
|-----------------------------|-----------------|-----------------|----------------|----------------|----------------|-----------------|-----------------|-----------------|----------------|
| PBMC (Day 1)                | 179/474(38)     | 15/474(3)       | 192/474(41)    | 144/474(30)    | 158/474(33)    | 170/474(36)     | 50/474(11)      | 401/474(85)     | 392/474(83)    |

**Table A12:** Overview of differential genes that mapped to any gene set by category (RNA-Seq). KEGGP: KEGG Pathways, KEGGM: KEGG Modules, GOBP: GO Biological Processes, GOCC: GO Cellular Components, GOMF: GO Molecular Functions, REACP: Reactome Pathways, BIOCP: BioCarta Pathways, CHEMG: Chemical/Genetic Perturbations, IMMO: Immunologic Signatures. n=#mapped DE genes, N=#DE genes.

| Category Name                                | Category<br>Genes # | Any-reg. DE<br>Genes #(%) | Up-reg.<br>DE Genes<br>#(%) | Down-reg.<br>DE Genes<br>#(%) | P-Value | FDR    | Jaccard<br>Index | Cell Type Over-<br>lap |
|----------------------------------------------|---------------------|---------------------------|-----------------------------|-------------------------------|---------|--------|------------------|------------------------|
| Influenza A                                  | 149                 | 20 (13.4)                 | 20 (13.4)                   | 0 (0)                         | <0.0001 | 0.0002 | 0.0649           | neu, mnc, tcl          |
| Osteoclast differentiation                   | 113                 | 17 (15)                   | 17 (15)                     | 0 (0)                         | <0.0001 | 0.0002 | 0.0618           | mnc                    |
| Pertussis                                    | 70                  | 12 (17.1)                 | 12 (17.1)                   | 0 (0)                         | <0.0001 | 0.0002 | 0.0506           | neu, dnc               |
| Measles                                      | 115                 | 14 (12.2)                 | 14 (12.2)                   | 0 (0)                         | <0.0001 | 0.0002 | 0.0500           | neu, mnc               |
| Herpes simplex infection                     | 154                 | 15 (9.7)                  | 15 (9.7)                    | 0 (0)                         | <0.0001 | 0.0002 | 0.0472           | neu, mnc, dnc          |
| Tuberculosis                                 | 159                 | 15 (9.4)                  | 15 (9.4)                    | 0 (0)                         | <0.0001 | 0.0002 | 0.0464           | neu                    |
| Phagosome                                    | 131                 | 13 (9.9)                  | 13 (9.9)                    | 0 (0)                         | <0.0001 | 0.0002 | 0.0438           | neu, mnc               |
| Staphylococcus aureus infection              | 47                  | 9 (19.1)                  | 9 (19.1)                    | 0 (0)                         | <0.0001 | 0.0002 | 0.0415           | neu, mnc, dnc          |
| Hepatitis B                                  | 131                 | 12 (9.2)                  | 11 (8.4)                    | 1 (0.8)                       | <0.0001 | 0.0002 | 0.0403           |                        |
| Leishmaniasis                                | 60                  | 9 (15)                    | 9 (15)                      | 0 (0)                         | <0.0001 | 0.0002 | 0.0391           | neu                    |
| Chemokine signaling pathway                  | 162                 | 12 (7.4)                  | 12 (7.4)                    | 0 (0)                         | <0.0001 | 0.0002 | 0.0365           |                        |
| Cytokine-cytokine receptor interaction       | 225                 | 14 (6.2)                  | 13 (5.8)                    | 1 (0.4)                       | <0.0001 | 0.0002 | 0.0359           |                        |
| Rheumatoid arthritis                         | 77                  | 8 (10.4)                  | 8 (10.4)                    | 0 (0)                         | <0.0001 | 0.0002 | 0.0323           | neu, tcl               |
| Legionellosis                                | 51                  | 7 (13.7)                  | 7 (13.7)                    | 0 (0)                         | <0.0001 | 0.0002 | 0.0314           |                        |
| Antigen processing and presentation          | 64                  | 7 (10.9)                  | 7 (10.9)                    | 0 (0)                         | <0.0001 | 0.0002 | 0.0297           | neu, mnc               |
| TNF signaling pathway                        | 102                 | 10 (9.8)                  | 10 (9.8)                    | 0 (0)                         | <0.0001 | 0.0003 | 0.0369           | tcl                    |
| Jak-STAT signaling pathway                   | 139                 | 11 (7.9)                  | 8 (5.8)                     | 3 (2.2)                       | <0.0001 | 0.0003 | 0.0358           |                        |
| NF-kappa B signaling pathway                 | 78                  | 8 (10.3)                  | 8 (10.3)                    | 0 (0)                         | <0.0001 | 0.0004 | 0.0321           |                        |
| NOD-like receptor signaling pathway          | 52                  | 7 (13.5)                  | 7 (13.5)                    | 0 (0)                         | <0.0001 | 0.0004 | 0.0312           | neu                    |
| Toll-like receptor signaling pathway         | 92                  | 8 (8.7)                   | 8 (8.7)                     | 0 (0)                         | <0.0001 | 0.0004 | 0.0304           |                        |
| Fc gamma R-mediated phagocytosis             | 86                  | 8 (9.3)                   | 8 (9.3)                     | 0 (0)                         | <0.0001 | 0.001  | 0.0311           |                        |
| Hepatitis C                                  | 117                 | 9 (7.7)                   | 9 (7.7)                     | 0 (0)                         | <0.0001 | 0.0011 | 0.0314           | neu, mnc, dnc,<br>tcl  |
| Inflammatory bowel disease (IBD)             | 53                  | 6 (11.3)                  | 5 (9.4)                     | 1 (1.9)                       | <0.0001 | 0.0011 | 0.0265           | neu                    |
| Prolactin signaling pathway                  | 67                  | 7 (10.4)                  | 7 (10.4)                    | 0 (0)                         | <0.0001 | 0.0012 | 0.0293           | tcl                    |
| Transcriptional misregulation in cancer      | 163                 | 10 (6.1)                  | 10 (6.1)                    | 0 (0)                         | 0.0001  | 0.0013 | 0.0301           | dnc                    |
| Salmonella infection                         | 78                  | 7 (9)                     | 7 (9)                       | 0 (0)                         | 0.0001  | 0.0013 | 0.0280           |                        |
| Lysosome                                     | 108                 | 8 (7.4)                   | 8 (7.4)                     | 0 (0)                         | 0.0002  | 0.0019 | 0.0287           |                        |
| Complement and coagulation cascades          | 61                  | 6 (9.8)                   | 6 (9.8)                     | 0 (0)                         | 0.0003  | 0.0029 | 0.0256           | dnc                    |
| Cytosolic DNA-sensing pathway                | 54                  | 5 (9.3)                   | 5 (9.3)                     | 0 (0)                         | 0.0005  | 0.0047 | 0.0219           |                        |
| Systemic lupus erythematosus                 | 106                 | 6 (5.7)                   | 6 (5.7)                     | 0 (0)                         | 0.0006  | 0.0062 | 0.0215           | neu, dnc               |
| Viral carcinogenesis                         | 182                 | 9 (4.9)                   | 9 (4.9)                     | 0 (0)                         | 0.0008  | 0.0077 | 0.0256           |                        |
| Intestinal immune network for IgA production | 37                  | 4 (10.8)                  | 4 (10.8)                    | 0 (0)                         | 0.001   | 0.0093 | 0.0189           | neu                    |

**Table A13:** Significantly enriched KEGG Pathways (RNA-Seq, PBMC, Day 1). Results sorted by FDR and Jaccard index. The last column indicates overlap with cell type-specific results: dnc: dendritic cells, mnc: monocytes, neu: neutrophils, tcl: T-cells, nkc: NK-cells, bcl: B-cells.

| Category Name                                               | Category Genes # | Any-reg. DE Genes #(%) | Up-reg. DE Genes #(%) | Down-reg. DE Genes #(%) | P-Value | FDR Adjusted P-Value | Jaccard Index | Cell Type Overlap |
|-------------------------------------------------------------|------------------|------------------------|-----------------------|-------------------------|---------|----------------------|---------------|-------------------|
| DEFENSE RESPONSE                                            | 262              | 30 (11.5)              | 30 (11.5)             | 0 (0)                   | <0.0001 | 0.0003               | 0.0708        | neu, mnc          |
| IMMUNE RESPONSE                                             | 231              | 24 (10.4)              | 24 (10.4)             | 0 (0)                   | <0.0001 | 0.0003               | 0.0602        | neu, mnc, dnc     |
| INFLAMMATORY RESPONSE                                       | 129              | 18 (14)                | 18 (14)               | 0 (0)                   | <0.0001 | 0.0003               | 0.0594        | neu, mnc          |
| RESPONSE TO WOUNDING                                        | 185              | 21 (11.4)              | 21 (11.4)             | 0 (0)                   | <0.0001 | 0.0003               | 0.0590        | neu, mnc          |
| RESPONSE TO EXTERNAL STIMULUS                               | 304              | 27 (8.9)               | 27 (8.9)              | 0 (0)                   | <0.0001 | 0.0003               | 0.0576        | neu               |
| IMMUNE SYSTEM PROCESS                                       | 324              | 28 (8.6)               | 28 (8.6)              | 0 (0)                   | <0.0001 | 0.0003               | 0.0574        | neu, mnc          |
| RESPONSE TO STRESS                                          | 494              | 28 (5.7)               | 28 (5.7)              | 0 (0)                   | <0.0001 | 0.0003               | 0.0426        |                   |
| SIGNAL TRANSDUCTION                                         | 1580             | 68 (4.3)               | 67 (4.2)              | 1 (0.1)                 | <0.0001 | 0.0003               | 0.0399        | neu, mnc          |
| PROTEIN KINASE CASCADE                                      | 285              | 18 (6.3)               | 18 (6.3)              | 0 (0)                   | <0.0001 | 0.0003               | 0.0392        | neu               |
| POSITIVE REGULATION OF BIOLOGICAL PROCESS                   | 690              | 32 (4.6)               | 32 (4.6)              | 0 (0)                   | <0.0001 | 0.0003               | 0.0376        | neu, mnc          |
| POSITIVE REGULATION OF CELLULAR PROCESS                     | 652              | 30 (4.6)               | 30 (4.6)              | 0 (0)                   | <0.0001 | 0.0003               | 0.0369        | neu, mnc          |
| RESPONSE TO BIOTIC STIMULUS                                 | 117              | 11 (9.4)               | 11 (9.4)              | 0 (0)                   | <0.0001 | 0.0003               | 0.0369        | neu, mnc          |
| MULTI ORGANISM PROCESS                                      | 157              | 12 (7.6)               | 12 (7.6)              | 0 (0)                   | <0.0001 | 0.0003               | 0.0356        | neu, mnc          |
| POSITIVE REGULATION OF CELLULAR PROTEIN METABOLIC PROCESS   | 70               | 9 (12.9)               | 9 (12.9)              | 0 (0)                   | <0.0001 | 0.0003               | 0.0356        |                   |
| POSITIVE REGULATION OF PROTEIN METABOLIC PROCESS            | 71               | 9 (12.7)               | 9 (12.7)              | 0 (0)                   | <0.0001 | 0.0003               | 0.0354        |                   |
| RESPONSE TO OTHER ORGANISM                                  | 79               | 9 (11.4)               | 9 (11.4)              | 0 (0)                   | <0.0001 | 0.0003               | 0.0344        | neu, mnc          |
| CELL SURFACE RECEPTOR LINKED SIGNAL TRANSDUCTION GO 0007166 | 622              | 27 (4.3)               | 27 (4.3)              | 0 (0)                   | <0.0001 | 0.0003               | 0.0343        |                   |
| INTRACELLULAR SIGNALING CASCADE                             | 647              | 27 (4.2)               | 27 (4.2)              | 0 (0)                   | <0.0001 | 0.0003               | 0.0333        | neu               |
| REGULATION OF DEVELOPMENTAL PROCESS                         | 434              | 20 (4.6)               | 20 (4.6)              | 0 (0)                   | <0.0001 | 0.0003               | 0.0330        | mnc               |
| JAK STAT CASCADE                                            | 31               | 7 (22.6)               | 7 (22.6)              | 0 (0)                   | <0.0001 | 0.0003               | 0.0324        | mnc               |
| CYTOKINE PRODUCTION                                         | 67               | 8 (11.9)               | 8 (11.9)              | 0 (0)                   | <0.0001 | 0.0003               | 0.0319        |                   |
| CELLULAR PROTEIN METABOLIC PROCESS                          | 1077             | 35 (3.2)               | 34 (3.2)              | 1 (0.1)                 | <0.0001 | 0.0003               | 0.0284        |                   |
| CELLULAR MACROMOLECULE METABOLIC PROCESS                    | 1089             | 35 (3.2)               | 34 (3.1)              | 1 (0.1)                 | <0.0001 | 0.0003               | 0.0281        |                   |
| PROTEIN METABOLIC PROCESS                                   | 1185             | 37 (3.1)               | 36 (3)                | 1 (0.1)                 | <0.0001 | 0.0003               | 0.0276        | neu, mnc          |
| RESPONSE TO VIRUS                                           | 47               | 6 (12.8)               | 6 (12.8)              | 0 (0)                   | <0.0001 | 0.0003               | 0.0258        | neu, mnc          |
| APOPTOSIS GO                                                | 428              | 19 (4.4)               | 19 (4.4)              | 0 (0)                   | <0.0001 | 0.0006               | 0.0316        |                   |
| PROGRAMMED CELL DEATH                                       | 429              | 19 (4.4)               | 19 (4.4)              | 0 (0)                   | <0.0001 | 0.0006               | 0.0316        | mnc               |
| ORGAN DEVELOPMENT                                           | 544              | 22 (4)                 | 20 (3.7)              | 2 (0.4)                 | <0.0001 | 0.0011               | 0.0308        |                   |
| MULTICELLULAR ORGANISMAL DEVELOPMENT                        | 987              | 31 (3.1)               | 27 (2.7)              | 4 (0.4)                 | <0.0001 | 0.0011               | 0.0270        |                   |
| MEMBRANE ORGANIZATION AND BIOGENESIS                        | 135              | 10 (7.4)               | 9 (6.7)               | 1 (0.7)                 | <0.0001 | 0.0013               | 0.0315        | neu, mnc          |
| REGULATION OF MOLECULAR FUNCTION                            | 312              | 15 (4.8)               | 15 (4.8)              | 0 (0)                   | <0.0001 | 0.0013               | 0.0307        |                   |
| CYTOKINE SECRETION                                          | 17               | 4 (23.5)               | 4 (23.5)              | 0 (0)                   | <0.0001 | 0.0013               | 0.0195        |                   |
| POSITIVE REGULATION OF TRANSLATION                          | 32               | 5 (15.6)               | 5 (15.6)              | 0 (0)                   | <0.0001 | 0.0015               | 0.0228        |                   |
| PHAGOCYTOSIS                                                | 18               | 4 (22.2)               | 4 (22.2)              | 0 (0)                   | <0.0001 | 0.0015               | 0.0194        | mnc               |
| REGULATION OF BIOLOGICAL QUALITY                            | 395              | 17 (4.3)               | 17 (4.3)              | 0 (0)                   | <0.0001 | 0.0021               | 0.0298        |                   |

| Category Name                                     | Category<br>Genes # | Any-reg. DE<br>Genes #(%) | Up-reg.<br>DE Genes<br>#(%) | Down-reg.<br>DE Genes<br>#(%) | P-Value | FDR<br>Ad-<br>justed<br>P-Value | Jaccard<br>Index | Cell Type Over-<br>lap |
|---------------------------------------------------|---------------------|---------------------------|-----------------------------|-------------------------------|---------|---------------------------------|------------------|------------------------|
| REGULATION OF APOPTOSIS                           | 338                 | 15 (4.4)                  | 15 (4.4)                    | 0 (0)                         | 0.0001  | 0.0025                          | 0.0291           | mnc                    |
| REGULATION OF PROGRAMMED CELL DEATH               | 339                 | 15 (4.4)                  | 15 (4.4)                    | 0 (0)                         | 0.0001  | 0.0025                          | 0.0291           | mnc                    |
| POSITIVE REGULATION OF SIGNAL TRANSDUCTION        | 127                 | 9 (7.1)                   | 9 (7.1)                     | 0 (0)                         | 0.0001  | 0.0026                          | 0.0290           | neu                    |
| RESPONSE TO CHEMICAL STIMULUS                     | 313                 | 14 (4.5)                  | 14 (4.5)                    | 0 (0)                         | 0.0002  | 0.0034                          | 0.0285           |                        |
| MESODERM DEVELOPMENT                              | 20                  | 4 (20)                    | 4 (20)                      | 0 (0)                         | 0.0002  | 0.0039                          | 0.0192           |                        |
| ANATOMICAL STRUCTURE DEVELOPMENT                  | 965                 | 29 (3)                    | 25 (2.6)                    | 4 (0.4)                       | 0.0002  | 0.0042                          | 0.0257           |                        |
| CELL DEVELOPMENT                                  | 571                 | 20 (3.5)                  | 19 (3.3)                    | 1 (0.2)                       | 0.0002  | 0.0045                          | 0.0269           | mnc                    |
| I KAPPAB KINASE NF KAPPAB CASCADE                 | 113                 | 8 (7.1)                   | 8 (7.1)                     | 0 (0)                         | 0.0002  | 0.0046                          | 0.0269           | neu                    |
| INTERLEUKIN 1 SECRETION                           | 10                  | 3 (30)                    | 3 (30)                      | 0 (0)                         | 0.0003  | 0.0051                          | 0.0151           |                        |
| REGULATION OF CELLULAR PROTEIN METABOLIC PROCESS  | 156                 | 9 (5.8)                   | 9 (5.8)                     | 0 (0)                         | 0.0003  | 0.0051                          | 0.0265           |                        |
| PROTEOLYSIS                                       | 185                 | 10 (5.4)                  | 10 (5.4)                    | 0 (0)                         | 0.0003  | 0.0061                          | 0.0272           |                        |
| REGULATION OF CELLULAR METABOLIC PROCESS          | 751                 | 24 (3.2)                  | 24 (3.2)                    | 0 (0)                         | 0.0003  | 0.0061                          | 0.0261           |                        |
| REGULATION OF CELL PROLIFERATION                  | 300                 | 13 (4.3)                  | 13 (4.3)                    | 0 (0)                         | 0.0004  | 0.0065                          | 0.0271           |                        |
| REGULATION OF METABOLIC PROCESS                   | 761                 | 24 (3.2)                  | 24 (3.2)                    | 0 (0)                         | 0.0004  | 0.0069                          | 0.0258           |                        |
| POSITIVE REGULATION OF CELLULAR METABOLIC PROCESS | 220                 | 11 (5)                    | 11 (5)                      | 0 (0)                         | 0.0004  | 0.0069                          | 0.0274           |                        |
| REGULATION OF CATALYTIC ACTIVITY                  | 265                 | 12 (4.5)                  | 12 (4.5)                    | 0 (0)                         | 0.0004  | 0.007                           | 0.0270           |                        |
| REGULATION OF PROTEIN METABOLIC PROCESS           | 164                 | 9 (5.5)                   | 9 (5.5)                     | 0 (0)                         | 0.0004  | 0.007                           | 0.0259           |                        |
| DETECTION OF BIOTIC STIMULUS                      | 10                  | 3 (30)                    | 3 (30)                      | 0 (0)                         | 0.0005  | 0.0075                          | 0.0151           |                        |
| POSITIVE REGULATION OF METABOLIC PROCESS          | 225                 | 11 (4.9)                  | 11 (4.9)                    | 0 (0)                         | 0.0005  | 0.0081                          | 0.0271           |                        |
| TYROSINE PHOSPHORYLATION OF STAT PROTEIN          | 13                  | 3 (23.1)                  | 3 (23.1)                    | 0 (0)                         | 0.0006  | 0.0087                          | 0.0149           |                        |
| CELL PROLIFERATION GO 0008283                     | 493                 | 17 (3.4)                  | 17 (3.4)                    | 0 (0)                         | 0.0006  | 0.0091                          | 0.0254           | neu, mnc               |
| PROTEIN SECRETION                                 | 31                  | 4 (12.9)                  | 4 (12.9)                    | 0 (0)                         | 0.0007  | 0.0096                          | 0.0183           |                        |

**Table A14:** Significantly enriched MSigDB GO Biological Processes (RNA-Seq, PBMC, Day 1). Results sorted by FDR and Jaccard index. The last column indicates overlap with cell type-specific results: dnc: dendritic cells, mnc: monocytes, neu: neutrophils, tcl: T-cells, nkc: NK-cells, bcl: B-cells.

| Category Name             | Category<br>Genes # | Any-reg. DE<br>Genes #(%) | Up-reg.<br>DE Genes<br>#(%) | Down-reg.<br>DE Genes<br>#(%) | P-Value | FDR<br>Ad-<br>justed<br>P-Value | Jaccard<br>Index | Cell Type Over-<br>lap |
|---------------------------|---------------------|---------------------------|-----------------------------|-------------------------------|---------|---------------------------------|------------------|------------------------|
| EXTRACELLULAR SPACE       | 234                 | 18 (7.7)                  | 17 (7.3)                    | 1 (0.4)                       | <0.0001 | 0.0002                          | 0.0500           |                        |
| EXTRACELLULAR REGION PART | 324                 | 21 (6.5)                  | 18 (5.6)                    | 3 (0.9)                       | <0.0001 | 0.0002                          | 0.0470           |                        |
| EXTRACELLULAR REGION      | 430                 | 24 (5.6)                  | 21 (4.9)                    | 3 (0.7)                       | <0.0001 | 0.0002                          | 0.0436           |                        |
| PLASMA MEMBRANE           | 1358                | 61 (4.5)                  | 58 (4.3)                    | 3 (0.2)                       | <0.0001 | 0.0002                          | 0.0423           | dnc                    |
| MEMBRANE                  | 1902                | 74 (3.9)                  | 71 (3.7)                    | 3 (0.2)                       | <0.0001 | 0.0002                          | 0.0375           | mnc, dnc               |
| CELL FRACTION             | 480                 | 22 (4.6)                  | 21 (4.4)                    | 1 (0.2)                       | <0.0001 | 0.0002                          | 0.0365           | neu                    |

| Category Name                | Category<br>Genes # | Any-reg. DE<br>Genes #(%) | Up-reg.<br>DE Genes<br>#(%) | Down-reg.<br>DE Genes<br>#(%) | P-Value | FDR<br>Ad-<br>justed<br>P-Value | Jaccard<br>Index | Cell Type Over-<br>lap |
|------------------------------|---------------------|---------------------------|-----------------------------|-------------------------------|---------|---------------------------------|------------------|------------------------|
| INTEGRAL TO PLASMA MEMBRANE  | 930                 | 37 (4)                    | 35 (3.8)                    | 2 (0.2)                       | <0.0001 | 0.0002                          | 0.0357           |                        |
| INTRINSIC TO PLASMA MEMBRANE | 943                 | 37 (3.9)                  | 35 (3.7)                    | 2 (0.2)                       | <0.0001 | 0.0002                          | 0.0352           |                        |
| INTEGRAL TO MEMBRANE         | 1272                | 48 (3.8)                  | 46 (3.6)                    | 2 (0.2)                       | <0.0001 | 0.0002                          | 0.0351           |                        |
| INTRINSIC TO MEMBRANE        | 1289                | 48 (3.7)                  | 46 (3.6)                    | 2 (0.2)                       | <0.0001 | 0.0002                          | 0.0347           |                        |
| PLASMA MEMBRANE PART         | 1101                | 41 (3.7)                  | 39 (3.5)                    | 2 (0.2)                       | <0.0001 | 0.0002                          | 0.0341           |                        |
| MEMBRANE PART                | 1597                | 55 (3.4)                  | 53 (3.3)                    | 2 (0.1)                       | <0.0001 | 0.0002                          | 0.0326           | dnc                    |
| MEMBRANE FRACTION            | 330                 | 14 (4.2)                  | 13 (3.9)                    | 1 (0.3)                       | 0.0004  | 0.0081                          | 0.0304           |                        |
| CYTOPLASM                    | 2054                | 48 (2.3)                  | 47 (2.3)                    | 1 (0)                         | 0.0006  | 0.0098                          | 0.0223           | neu                    |

**Table A15:** Significantly enriched MSigDB GO Cellular Components (RNA-Seq, PBMC, Day 1). Results sorted by FDR and Jaccard index. The last column indicates overlap with cell type-specific results: dnc: dendritic cells, mnc: monocytes, neu: neutrophils, tcl: T-cells, nkc: NK-cells, bcl: B-cells.

| Category Name                    | Category<br>Genes # | Any-reg. DE<br>Genes #(%) | Up-reg.<br>DE Genes<br>#(%) | Down-reg.<br>DE Genes<br>#(%) | P-Value | FDR<br>Ad-<br>justed<br>P-Value | Jaccard<br>Index | Cell Type Over-<br>lap |
|----------------------------------|---------------------|---------------------------|-----------------------------|-------------------------------|---------|---------------------------------|------------------|------------------------|
| RECEPTOR ACTIVITY                | 554                 | 28 (5.1)                  | 28 (5.1)                    | 0 (0)                         | <0.0001 | 0.002                           | 0.0409           | mnc                    |
| PATTERN BINDING                  | 44                  | 7 (15.9)                  | 7 (15.9)                    | 0 (0)                         | <0.0001 | 0.002                           | 0.0359           |                        |
| CYSTEINE TYPE PEPTIDASE ACTIVITY | 48                  | 6 (12.5)                  | 6 (12.5)                    | 0 (0)                         | <0.0001 | 0.0066                          | 0.0300           |                        |

**Table A16:** Significantly enriched MSigDB GO Molecular Functions (RNA-Seq, PBMC, Day 1). Results sorted by FDR and Jaccard index. The last column indicates overlap with cell type-specific results: dnc: dendritic cells, mnc: monocytes, neu: neutrophils, tcl: T-cells, nkc: NK-cells, bcl: B-cells.

| Category Name                       | Category<br>Genes # | Any-reg. DE<br>Genes #(%) | Up-reg.<br>DE Genes<br>#(%) | Down-reg.<br>DE Genes<br>#(%) | P-Value | FDR<br>Ad-<br>justed<br>P-Value | Jaccard<br>Index | Cell Type Over-<br>lap          |
|-------------------------------------|---------------------|---------------------------|-----------------------------|-------------------------------|---------|---------------------------------|------------------|---------------------------------|
| INTERFERON SIGNALING                | 153                 | 30 (19.6)                 | 30 (19.6)                   | 0 (0)                         | <0.0001 | 0.0006                          | 0.1024           | neu, mnc, dnc,<br>tcl, nkc, bcl |
| CYTOKINE SIGNALING IN IMMUNE SYSTEM | 258                 | 37 (14.3)                 | 37 (14.3)                   | 0 (0)                         | <0.0001 | 0.0006                          | 0.0946           | neu, mnc, dnc,<br>tcl, nkc, bcl |
| INTERFERON ALPHA BETA SIGNALING     | 62                  | 19 (30.6)                 | 19 (30.6)                   | 0 (0)                         | <0.0001 | 0.0006                          | 0.0892           | neu, mnc, dnc,<br>tcl, nkc, bcl |
| INTERFERON GAMMA SIGNALING          | 59                  | 18 (30.5)                 | 18 (30.5)                   | 0 (0)                         | <0.0001 | 0.0006                          | 0.0853           | neu, mnc, dnc,<br>tcl, nkc, bcl |

| Category Name                                                                                          | Category Genes # | Any-reg. DE Genes #(%) | Up-reg. DE Genes #(%) | Down-reg. DE Genes #(%) | P-Value | FDR Adjusted P-Value | Jaccard Index | Cell Type Overlap       |
|--------------------------------------------------------------------------------------------------------|------------------|------------------------|-----------------------|-------------------------|---------|----------------------|---------------|-------------------------|
| IMMUNE SYSTEM                                                                                          | 871              | 76 (8.7)               | 76 (8.7)              | 0 (0)                   | <0.0001 | 0.0006               | 0.0788        | neu, mnc, dnc, tcl, bcl |
| INNATE IMMUNE SYSTEM                                                                                   | 263              | 29 (11)                | 29 (11)               | 0 (0)                   | <0.0001 | 0.0006               | 0.0718        | neu, mnc, dnc           |
| TOLL RECEPTOR CASCADES                                                                                 | 108              | 13 (12)                | 13 (12)               | 0 (0)                   | <0.0001 | 0.0006               | 0.0491        |                         |
| ADAPTIVE IMMUNE SYSTEM                                                                                 | 495              | 27 (5.5)               | 27 (5.5)              | 0 (0)                   | <0.0001 | 0.0006               | 0.0423        | neu, mnc, dnc           |
| ACTIVATED TLR4 SIGNALLING                                                                              | 87               | 10 (11.5)              | 10 (11.5)             | 0 (0)                   | <0.0001 | 0.0006               | 0.0405        |                         |
| ANTIGEN PROCESSING CROSS PRESENTATION                                                                  | 72               | 8 (11.1)               | 8 (11.1)              | 0 (0)                   | <0.0001 | 0.0006               | 0.0342        | neu, mnc, dnc           |
| NUCLEOTIDE BINDING DOMAIN LEUCINE RICH REPEAT CONTAINING RECEPTOR NLR SIGNALING PATHWAYS INFLAMMASOMES | 43               | 7 (16.3)               | 7 (16.3)              | 0 (0)                   | <0.0001 | 0.0006               | 0.0340        | neu                     |
| G ALPHA I SIGNALLING EVENTS                                                                            | 16               | 6 (37.5)               | 6 (37.5)              | 0 (0)                   | <0.0001 | 0.0006               | 0.0333        |                         |
| IMMUNOREGULATORY INTERACTIONS BETWEEN A LYMPHOID AND A NON LYMPHOID CELL                               | 185              | 13 (7)                 | 13 (7)                | 0 (0)                   | <0.0001 | 0.0008               | 0.0380        |                         |
| RIG I MDA5 MEDIATED INDUCTION OF IFN ALPHA BETA PATHWAYS                                               | 62               | 8 (12.9)               | 8 (12.9)              | 0 (0)                   | <0.0001 | 0.0008               | 0.0357        | mnc                     |
| THE NLRP3 INFLAMMASOME                                                                                 | 70               | 8 (11.4)               | 8 (11.4)              | 0 (0)                   | <0.0001 | 0.0008               | 0.0345        | neu, dnc                |
| CLASS I MHC MEDIATED ANTIGEN PROCESSING PRESENTATION                                                   | 11               | 4 (36.4)               | 4 (36.4)              | 0 (0)                   | <0.0001 | 0.0008               | 0.0226        |                         |
| MYD88 MAL CASCADE INITIATED ON PLASMA MEMBRANE                                                         | 228              | 13 (5.7)               | 13 (5.7)              | 0 (0)                   | <0.0001 | 0.001                | 0.0338        | neu, mnc, dnc           |
| GPCR LIGAND BINDING                                                                                    | 76               | 8 (10.5)               | 8 (10.5)              | 0 (0)                   | <0.0001 | 0.001                | 0.0336        |                         |
| GROWTH HORMONE RECEPTOR SIGNALING                                                                      | 383              | 16 (4.2)               | 16 (4.2)              | 0 (0)                   | <0.0001 | 0.001                | 0.0298        |                         |
| NFKB AND MAP KINASES ACTIVATION MEDIATED BY TLR4 SIGNALING REPERTOIRE                                  | 24               | 5 (20.8)               | 5 (20.8)              | 0 (0)                   | <0.0001 | 0.001                | 0.0265        |                         |
| REGULATION OF IFNG SIGNALING                                                                           | 66               | 7 (10.6)               | 7 (10.6)              | 0 (0)                   | <0.0001 | 0.0013               | 0.0306        |                         |
| SIGNALING BY ILS                                                                                       | 13               | 4 (30.8)               | 4 (30.8)              | 0 (0)                   | <0.0001 | 0.0015               | 0.0223        |                         |
| HEMOSTASIS                                                                                             | 101              | 9 (8.9)                | 9 (8.9)               | 0 (0)                   | <0.0001 | 0.0018               | 0.0344        | dnc                     |
| NEGATIVE REGULATORS OF RIG I MDA5 SIGNALING                                                            | 440              | 18 (4.1)               | 18 (4.1)              | 0 (0)                   | <0.0001 | 0.002                | 0.0304        |                         |
| SIGNAL AMPLIFICATION                                                                                   | 29               | 5 (17.2)               | 5 (17.2)              | 0 (0)                   | <0.0001 | 0.0022               | 0.0258        | neu, dnc                |
| PLATELET ACTIVATION SIGNALING AND AGGREGATION                                                          | 31               | 5 (16.1)               | 5 (16.1)              | 0 (0)                   | <0.0001 | 0.0026               | 0.0255        |                         |
| CLASS A1 RHODOPSIN LIKE RECEPTORS                                                                      | 191              | 11 (5.8)               | 11 (5.8)              | 0 (0)                   | 0.0001  | 0.0032               | 0.0314        |                         |
| TRAFFICKING AND PROCESSING OF ENDOSOMAL TLR                                                            | 282              | 12 (4.3)               | 12 (4.3)              | 0 (0)                   | 0.0002  | 0.0046               | 0.0273        |                         |
| CROSS PRESENTATION OF SOLUBLE EXOGENOUS ANTIGENS ENDOSOMES                                             | 10               | 3 (30)                 | 3 (30)                | 0 (0)                   | 0.0003  | 0.006                | 0.0169        |                         |
| ADP SIGNALLING THROUGH P2RY1                                                                           | 48               | 5 (10.4)               | 5 (10.4)              | 0 (0)                   | 0.0003  | 0.0061               | 0.0235        | neu, dnc                |
| CHONDROITIN SULFATE DERMATAN SULFATE METABOLISM                                                        | 25               | 4 (16)                 | 4 (16)                | 0 (0)                   | 0.0003  | 0.0076               | 0.0209        |                         |
| IL 6 SIGNALING                                                                                         | 42               | 5 (11.9)               | 4 (9.5)               | 1 (2.4)                 | 0.0004  | 0.0078               | 0.0242        |                         |
| ANTIVIRAL MECHANISM BY IFN STIMULATED GENES                                                            | 10               | 3 (30)                 | 3 (30)                | 0 (0)                   | 0.0004  | 0.0078               | 0.0169        | tcl                     |
|                                                                                                        | 65               | 6 (9.2)                | 6 (9.2)               | 0 (0)                   | 0.0005  | 0.0093               | 0.0262        | neu, dnc                |

**Table A17:** Significantly enriched MSigDB Reactome Pathways (RNA-Seq, PBMC, Day 1). Results sorted by FDR and Jaccard index. The last column indicates overlap with cell type-specific results: dnc: dendritic cells, mnc: monocytes, neu: neutrophils, tcl: T-cells, nkc: NK-cells, bcl: B-cells.

| Category Name                                         | Category Genes # | Any-reg. DE Genes #(%) | Up-reg. DE Genes #(%) | Down-reg. DE Genes #(%) | P-Value | FDR Adjusted P-Value | Jaccard Index | Cell Type Overlap            |
|-------------------------------------------------------|------------------|------------------------|-----------------------|-------------------------|---------|----------------------|---------------|------------------------------|
| VERHAAK AML WITH NPM1 MUTATED UP                      | 190              | 58 (30.5)              | 58 (30.5)             | 0 (0)                   | <0.0001 | 0.0001               | 0.1088        | neu, mnc, dnc                |
| FULCHER INFLAMMATORY RESPONSE LECTIN VS LPS DN        | 462              | 81 (17.5)              | 80 (17.3)             | 1 (0.2)                 | <0.0001 | 0.0001               | 0.1036        | neu, mnc, dnc, tcl, nkc, bcl |
| HECKER IFNB1 TARGETS                                  | 92               | 45 (48.9)              | 45 (48.9)             | 0 (0)                   | <0.0001 | 0.0001               | 0.1004        | neu, mnc, dnc, tcl, nkc, bcl |
| ALTEMEIER RESPONSE TO LPS WITH MECHANICAL VENTILATION | 126              | 48 (38.1)              | 48 (38.1)             | 0 (0)                   | <0.0001 | 0.0001               | 0.1002        | neu, mnc, dnc, tcl, nkc, bcl |
| RUTELLA RESPONSE TO HGF VS CSF2RB AND IL4 UP          | 391              | 61 (15.6)              | 61 (15.6)             | 0 (0)                   | <0.0001 | 0.0001               | 0.0834        | neu, mnc, dnc                |
| MCLACHLAN DENTAL CARIES UP                            | 227              | 48 (21.1)              | 48 (21.1)             | 0 (0)                   | <0.0001 | 0.0001               | 0.0828        | neu, mnc, dnc, tcl           |
| JISON SICKLE CELL DISEASE UP                          | 174              | 42 (24.1)              | 42 (24.1)             | 0 (0)                   | <0.0001 | 0.0001               | 0.0788        | neu, mnc, dnc, tcl, nkc, bcl |
| BROWNE INTERFERON RESPONSIVE GENES                    | 68               | 34 (50)                | 34 (50)               | 0 (0)                   | <0.0001 | 0.0001               | 0.0782        | neu, mnc, dnc, tcl, nkc, bcl |
| RUTELLA RESPONSE TO CSF2RB AND IL4 DN                 | 303              | 51 (16.8)              | 51 (16.8)             | 0 (0)                   | <0.0001 | 0.0001               | 0.0781        | neu, mnc, dnc                |
| MARKEY RB1 ACUTE LOF UP                               | 214              | 43 (20.1)              | 43 (20.1)             | 0 (0)                   | <0.0001 | 0.0001               | 0.0752        | neu, mnc, dnc, tcl, nkc, bcl |
| SANA RESPONSE TO IFNG UP                              | 74               | 32 (43.2)              | 32 (43.2)             | 0 (0)                   | <0.0001 | 0.0001               | 0.0722        | neu, mnc, dnc, tcl, nkc, bcl |
| BOSCO INTERFERON INDUCED ANTIVIRAL MODULE             | 76               | 32 (42.1)              | 32 (42.1)             | 0 (0)                   | <0.0001 | 0.0001               | 0.0719        | neu, mnc, dnc, tcl, nkc, bcl |
| TAKEDA TARGETS OF NUP98 HOXA9 FUSION 3D UP            | 178              | 38 (21.3)              | 38 (21.3)             | 0 (0)                   | <0.0001 | 0.0001               | 0.0702        | neu, mnc, dnc, tcl, nkc, bcl |
| GAL LEUKEMIC STEM CELL DN                             | 244              | 42 (17.2)              | 42 (17.2)             | 0 (0)                   | <0.0001 | 0.0001               | 0.0697        | neu, mnc, dnc                |
| TAKEDA TARGETS OF NUP98 HOXA9 FUSION 10D UP           | 186              | 37 (19.9)              | 37 (19.9)             | 0 (0)                   | <0.0001 | 0.0001               | 0.0673        | neu, mnc, dnc, tcl, nkc, bcl |
| MCLACHLAN DENTAL CARIES DN                            | 219              | 39 (17.8)              | 39 (17.8)             | 0 (0)                   | <0.0001 | 0.0001               | 0.0671        | neu, mnc, dnc, tcl           |
| NUYTEN EZH2 TARGETS UP                                | 1002             | 87 (8.7)               | 83 (8.3)              | 4 (0.4)                 | <0.0001 | 0.0001               | 0.0661        | neu, mnc, dnc, tcl, nkc, bcl |
| ZHANG RESPONSE TO IKK INHIBITOR AND TNF UP            | 221              | 38 (17.2)              | 37 (16.7)             | 1 (0.5)                 | <0.0001 | 0.0001               | 0.0651        | neu, mnc, dnc, tcl           |
| CHEN METABOLIC SYNDROM NETWORK                        | 1172             | 90 (7.7)               | 86 (7.3)              | 4 (0.3)                 | <0.0001 | 0.0001               | 0.0607        | neu, mnc, dnc, tcl           |
| RUTELLA RESPONSE TO HGF UP                            | 398              | 45 (11.3)              | 45 (11.3)             | 0 (0)                   | <0.0001 | 0.0001               | 0.0597        | neu, mnc, dnc                |
| WALLACE PROSTATE CANCER RACE UP                       | 275              | 38 (13.8)              | 38 (13.8)             | 0 (0)                   | <0.0001 | 0.0001               | 0.0596        | neu, mnc, dnc, tcl, nkc, bcl |



| Category Name                                        | Category Genes # | Any-reg. DE Genes #(%) | Up-reg. DE Genes #(%) | Down-reg. DE Genes #(%) | P-Value | FDR Adjusted P-Value | Jaccard Index | Cell Type Overlap            |
|------------------------------------------------------|------------------|------------------------|-----------------------|-------------------------|---------|----------------------|---------------|------------------------------|
| BERTUCCI MEDULLARY VS DUCTAL BREAST CANCER UP        | 200              | 33 (16.5)              | 32 (16)               | 1 (0.5)                 | <0.0001 | 0.0001               | 0.0581        | neu, mnc, dnc, tcl, nkc, bcl |
| JAATINEN HEMATOPOIETIC STEM CELL DN                  | 221              | 34 (15.4)              | 34 (15.4)             | 0 (0)                   | <0.0001 | 0.0001               | 0.0578        | dnc                          |
| WIELAND UP BY HBV INFECTION                          | 100              | 27 (27)                | 27 (27)               | 0 (0)                   | <0.0001 | 0.0001               | 0.0570        | neu, mnc, dnc, tcl, bcl      |
| ICHIBA GRAFT VERSUS HOST DISEASE D7 UP               | 105              | 27 (25.7)              | 27 (25.7)             | 0 (0)                   | <0.0001 | 0.0001               | 0.0564        | neu, mnc, dnc, tcl, nkc, bcl |
| RODWELL AGING KIDNEY UP                              | 465              | 46 (9.9)               | 43 (9.2)              | 3 (0.6)                 | <0.0001 | 0.0001               | 0.0561        | neu, mnc, dnc, tcl           |
| DELYS THYROID CANCER UP                              | 435              | 44 (10.1)              | 42 (9.7)              | 2 (0.5)                 | <0.0001 | 0.0001               | 0.0556        | neu, mnc, dnc, tcl           |
| TONKS TARGETS OF RUNX1 RUNX1T1 FUSION ERYTHROCYTE UP | 151              | 29 (19.2)              | 28 (18.5)             | 1 (0.7)                 | <0.0001 | 0.0001               | 0.0554        | neu, mnc, dnc, tcl           |
| SMIRNOV CIRCULATING ENDOTHELIOCYTES IN CANCER UP     | 152              | 29 (19.1)              | 29 (19.1)             | 0 (0)                   | <0.0001 | 0.0001               | 0.0553        | neu, mnc                     |
| MOSERLE IFNA RESPONSE                                | 31               | 22 (71)                | 22 (71)               | 0 (0)                   | <0.0001 | 0.0001               | 0.0537        | neu, mnc, dnc, tcl, nkc, bcl |
| SCHUETZ BREAST CANCER DUCTAL INVASIVE UP             | 338              | 37 (10.9)              | 36 (10.7)             | 1 (0.3)                 | <0.0001 | 0.0001               | 0.0527        | neu, mnc, dnc, tcl           |
| THUM SYSTOLIC HEART FAILURE UP                       | 404              | 40 (9.9)               | 39 (9.7)              | 1 (0.2)                 | <0.0001 | 0.0001               | 0.0523        | neu, mnc, dnc                |
| ICHIBA GRAFT VERSUS HOST DISEASE 35D UP              | 126              | 26 (20.6)              | 26 (20.6)             | 0 (0)                   | <0.0001 | 0.0001               | 0.0519        | neu, mnc, dnc, bcl           |
| TAKEDA TARGETS OF NUP98 HOXA9 FUSION 16D UP          | 169              | 28 (16.6)              | 28 (16.6)             | 0 (0)                   | <0.0001 | 0.0001               | 0.0517        | neu, mnc, dnc, tcl, nkc      |
| HELLER SILENCED BY METHYLATION UP                    | 273              | 33 (12.1)              | 32 (11.7)             | 1 (0.4)                 | <0.0001 | 0.0001               | 0.0515        | neu, mnc, dnc, tcl, nkc      |
| FOSTER TOLERANT MACROPHAGE DN                        | 405              | 39 (9.6)               | 38 (9.4)              | 1 (0.2)                 | <0.0001 | 0.0001               | 0.0508        | neu, mnc, dnc, tcl           |
| BROWN MYELOID CELL DEVELOPMENT UP                    | 159              | 27 (17)                | 27 (17)               | 0 (0)                   | <0.0001 | 0.0001               | 0.0507        | neu, mnc, dnc                |
| TAKEDA TARGETS OF NUP98 HOXA9 FUSION 8D UP           | 155              | 26 (16.8)              | 25 (16.1)             | 1 (0.6)                 | <0.0001 | 0.0001               | 0.0491        | neu, mnc, dnc, tcl, nkc, bcl |
| LENAOUR DENDRITIC CELL MATURATION DN                 | 139              | 25 (18)                | 25 (18)               | 0 (0)                   | <0.0001 | 0.0001               | 0.0485        | dnc                          |
| DEBIASI APOPTOSIS BY REOVIRUS INFECTION UP           | 317              | 33 (10.4)              | 32 (10.1)             | 1 (0.3)                 | <0.0001 | 0.0001               | 0.0482        | neu, mnc, dnc, tcl, nkc, bcl |
| LIAN LIPA TARGETS 3M                                 | 56               | 21 (37.5)              | 21 (37.5)             | 0 (0)                   | <0.0001 | 0.0001               | 0.0482        | dnc                          |
| SANA TNF SIGNALING UP                                | 81               | 22 (27.2)              | 22 (27.2)             | 0 (0)                   | <0.0001 | 0.0001               | 0.0478        | neu, mnc, dnc, tcl, nkc      |

| Category Name                                      | Category Genes # | Any-reg. DE Genes #(%) | Up-reg. DE Genes #(%) | Down-reg. DE Genes #(%) | P-Value | FDR Adjusted P-Value | Jaccard Index | Cell Type Overlap            |
|----------------------------------------------------|------------------|------------------------|-----------------------|-------------------------|---------|----------------------|---------------|------------------------------|
| GRAESSMANN RESPONSE TO MC AND SERUM DEPRIVATION UP | 203              | 27 (13.3)              | 26 (12.8)             | 1 (0.5)                 | <0.0001 | 0.0001               | 0.0468        | neu, mnc, dnc, tcl, nkc, bcl |
| POOLA INVASIVE BREAST CANCER UP                    | 272              | 30 (11)                | 29 (10.7)             | 1 (0.4)                 | <0.0001 | 0.0001               | 0.0467        | neu, mnc, dnc, tcl           |
| LIAN LIPA TARGETS 6M                               | 70               | 21 (30)                | 21 (30)               | 0 (0)                   | <0.0001 | 0.0001               | 0.0467        | dnc                          |
| BOQUEST STEM CELL CULTURED VS FRESH UP             | 409              | 36 (8.8)               | 34 (8.3)              | 2 (0.5)                 | <0.0001 | 0.0001               | 0.0465        | neu, mnc, dnc                |
| SEKI INFLAMMATORY RESPONSE LPS UP                  | 77               | 21 (27.3)              | 20 (26)               | 1 (1.3)                 | <0.0001 | 0.0001               | 0.0460        | neu, mnc, dnc, tcl, bcl      |
| BENNETT SYSTEMIC LUPUS ERYTHEMATOSUS               | 32               | 19 (59.4)              | 19 (59.4)             | 0 (0)                   | <0.0001 | 0.0001               | 0.0459        | neu, mnc, dnc, tcl, nkc      |
| FEVR CTNNB1 TARGETS UP                             | 672              | 47 (7)                 | 46 (6.8)              | 1 (0.1)                 | <0.0001 | 0.0001               | 0.0458        | neu, mnc, dnc, tcl, nkc      |
| ZHOU INFLAMMATORY RESPONSE LPS UP                  | 401              | 35 (8.7)               | 35 (8.7)              | 0 (0)                   | <0.0001 | 0.0001               | 0.0456        | neu, mnc, dnc, tcl           |
| GRAESSMANN APOPTOSIS BY DOXORUBICIN UP             | 1132             | 65 (5.7)               | 60 (5.3)              | 5 (0.4)                 | <0.0001 | 0.0001               | 0.0443        | neu, mnc, dnc, tcl           |
| GRAESSMANN APOPTOSIS BY SERUM DEPRIVATION UP       | 541              | 40 (7.4)               | 37 (6.8)              | 3 (0.6)                 | <0.0001 | 0.0001               | 0.0443        | neu, mnc, dnc, tcl, nkc      |
| DAUER STAT3 TARGETS DN                             | 51               | 19 (37.3)              | 19 (37.3)             | 0 (0)                   | <0.0001 | 0.0001               | 0.0439        | neu, mnc, dnc, tcl, nkc      |
| RADAEVA RESPONSE TO IFNA1 UP                       | 52               | 19 (36.5)              | 19 (36.5)             | 0 (0)                   | <0.0001 | 0.0001               | 0.0438        | neu, mnc, dnc, tcl, nkc, bcl |
| FOSTER TOLERANT MACROPHAGE UP                      | 155              | 23 (14.8)              | 23 (14.8)             | 0 (0)                   | <0.0001 | 0.0001               | 0.0432        | neu, mnc, dnc, tcl           |
| PICCALUGA ANGIOIMMUNOBLASTIC LYMPHOMA UP           | 205              | 25 (12.2)              | 24 (11.7)             | 1 (0.5)                 | <0.0001 | 0.0001               | 0.0430        | mnc, dnc                     |
| ONDER CDH1 TARGETS 2 DN                            | 454              | 35 (7.7)               | 34 (7.5)              | 1 (0.2)                 | <0.0001 | 0.0001               | 0.0427        | neu, mnc, dnc                |
| DIAZ CHRONIC MEYLOGENOUS LEUKEMIA DN               | 112              | 21 (18.8)              | 21 (18.8)             | 0 (0)                   | <0.0001 | 0.0001               | 0.0427        | neu, mnc, dnc                |
| NUYTEN NIPP1 TARGETS UP                            | 748              | 47 (6.3)               | 47 (6.3)              | 0 (0)                   | <0.0001 | 0.0001               | 0.0426        | neu, mnc, dnc, tcl, bcl      |
| PHONG TNF RESPONSE NOT VIA P38                     | 333              | 30 (9)                 | 30 (9)                | 0 (0)                   | <0.0001 | 0.0001               | 0.0426        | mnc, dnc, tcl                |
| NAKAYAMA SOFT TISSUE TUMORS PCA1 UP                | 69               | 19 (27.5)              | 19 (27.5)             | 0 (0)                   | <0.0001 | 0.0001               | 0.0421        | neu, mnc, dnc                |
| SEITZ NEOPLASTIC TRANSFORMATION BY 8P DELETION UP  | 69               | 19 (27.5)              | 19 (27.5)             | 0 (0)                   | <0.0001 | 0.0001               | 0.0421        | neu, mnc, dnc, tcl, nkc      |
| RUTELLA RESPONSE TO HGF DN                         | 224              | 25 (11.2)              | 25 (11.2)             | 0 (0)                   | <0.0001 | 0.0001               | 0.0417        | mnc, dnc                     |
| YANG BCL3 TARGETS UP                               | 351              | 30 (8.5)               | 30 (8.5)              | 0 (0)                   | <0.0001 | 0.0001               | 0.0416        | neu, mnc, dnc, tcl           |

Appendix "PBMC response to AS03-H5N1 vaccine"

Howard, Goll et al.

| Category Name                                     | Category Genes # | Any-reg. DE Genes #(%) | Up-reg. DE Genes #(%) | Down-reg. DE Genes #(%) | P-Value | FDR Adjusted P-Value | Jaccard Index | Cell Type Overlap            |
|---------------------------------------------------|------------------|------------------------|-----------------------|-------------------------|---------|----------------------|---------------|------------------------------|
| QI PLASMACYTOMA UP                                | 251              | 26 (10.4)              | 26 (10.4)             | 0 (0)                   | <0.0001 | 0.0001               | 0.0415        | neu, mnc, dnc, tcl           |
| OSWALD HEMATOPOIETIC STEM CELL IN COLLAGEN GEL UP | 227              | 25 (11)                | 24 (10.6)             | 1 (0.4)                 | <0.0001 | 0.0001               | 0.0415        | mnc, dnc                     |
| DER IFN BETA RESPONSE UP                          | 101              | 20 (19.8)              | 20 (19.8)             | 0 (0)                   | <0.0001 | 0.0001               | 0.0415        | neu, mnc, dnc, tcl, nkc, bcl |
| HESS TARGETS OF HOXA9 AND MEIS1 DN                | 76               | 19 (25)                | 19 (25)               | 0 (0)                   | <0.0001 | 0.0001               | 0.0415        | neu, mnc, dnc                |
| VERHAAK GLIOBLASTOMA NEURAL                       | 205              | 24 (11.7)              | 23 (11.2)             | 1 (0.5)                 | <0.0001 | 0.0001               | 0.0412        | neu, mnc, dnc                |
| HIRSCH CELLULAR TRANSFORMATION SIGNATURE UP       | 239              | 25 (10.5)              | 25 (10.5)             | 0 (0)                   | <0.0001 | 0.0001               | 0.0407        | neu, mnc, dnc                |
| RIGGINS TAMOXIFEN RESISTANCE DN                   | 215              | 24 (11.2)              | 23 (10.7)             | 1 (0.5)                 | <0.0001 | 0.0001               | 0.0405        | neu, mnc, dnc, tcl, bcl      |
| HAHTOLA MYCOSIS FUNGOIDES CD4 UP                  | 61               | 18 (29.5)              | 18 (29.5)             | 0 (0)                   | <0.0001 | 0.0001               | 0.0405        | neu                          |
| MISSIAGLIA REGULATED BY METHYLATION UP            | 120              | 20 (16.7)              | 18 (15)               | 2 (1.7)                 | <0.0001 | 0.0001               | 0.0399        | neu, mnc, dnc, tcl           |
| DER IFN ALPHA RESPONSE UP                         | 74               | 18 (24.3)              | 18 (24.3)             | 0 (0)                   | <0.0001 | 0.0001               | 0.0394        | neu, mnc, dnc, tcl, nkc, bcl |
| LEE BMP2 TARGETS UP                               | 723              | 42 (5.8)               | 40 (5.5)              | 2 (0.3)                 | <0.0001 | 0.0001               | 0.0388        | neu, mnc, dnc, tcl           |
| BOYLAN MULTIPLE MYELOMA C D DN                    | 244              | 24 (9.8)               | 24 (9.8)              | 0 (0)                   | <0.0001 | 0.0001               | 0.0386        | neu, mnc, dnc                |
| TAKEDA TARGETS OF NUP98 HOXA9 FUSION 8D DN        | 193              | 22 (11.4)              | 22 (11.4)             | 0 (0)                   | <0.0001 | 0.0001               | 0.0385        | mnc, dnc                     |
| LIU VAV3 PROSTATE CARCINOGENESIS UP               | 85               | 18 (21.2)              | 18 (21.2)             | 0 (0)                   | <0.0001 | 0.0001               | 0.0385        | neu, mnc, dnc, tcl, nkc, bcl |
| BROCKE APOPTOSIS REVERSED BY IL6                  | 144              | 20 (13.9)              | 20 (13.9)             | 0 (0)                   | <0.0001 | 0.0001               | 0.0381        | neu, mnc, dnc, tcl           |
| WONG ADULT TISSUE STEM MODULE                     | 697              | 40 (5.7)               | 38 (5.5)              | 2 (0.3)                 | <0.0001 | 0.0001               | 0.0378        | neu, mnc, dnc                |
| VANTVEER BREAST CANCER ESR1 DN                    | 232              | 23 (9.9)               | 22 (9.5)              | 1 (0.4)                 | <0.0001 | 0.0001               | 0.0377        | neu, mnc, dnc                |
| FARMER BREAST CANCER CLUSTER 1                    | 39               | 16 (41)                | 16 (41)               | 0 (0)                   | <0.0001 | 0.0001               | 0.0377        | neu, mnc, dnc, tcl, nkc      |
| ONKEN UVEAL MELANOMA UP                           | 763              | 42 (5.5)               | 41 (5.4)              | 1 (0.1)                 | <0.0001 | 0.0001               | 0.0374        | neu, mnc, dnc                |
| WANG RESPONSE TO GSK3 INHIBITOR SB216763 UP       | 378              | 28 (7.4)               | 28 (7.4)              | 0 (0)                   | <0.0001 | 0.0001               | 0.0373        | neu, tcl                     |
| HORIUCHI WTAP TARGETS UP                          | 295              | 25 (8.5)               | 23 (7.8)              | 2 (0.7)                 | <0.0001 | 0.0001               | 0.0373        | neu, mnc, dnc, tcl           |
| GOZGIT ESR1 TARGETS DN                            | 741              | 41 (5.5)               | 40 (5.4)              | 1 (0.1)                 | <0.0001 | 0.0001               | 0.0372        | neu, mnc, dnc, tcl           |
| DANG REGULATED BY MYC DN                          | 247              | 23 (9.3)               | 22 (8.9)              | 1 (0.4)                 | <0.0001 | 0.0001               | 0.0368        | neu, mnc, dnc, tcl           |
| HOSHIDA LIVER CANCER SUBCLASS S1                  | 225              | 22 (9.8)               | 22 (9.8)              | 0 (0)                   | <0.0001 | 0.0001               | 0.0364        | neu                          |

Appendix "PBMC response to AS03-H5N1 vaccine"

Howard, Goll et al.

| Category Name                                       | Category Genes # | Any-reg. DE Genes #(%) | Up-reg. DE Genes #(%) | Down-reg. DE Genes #(%) | P-Value | FDR Adjusted P-Value | Jaccard Index | Cell Type Overlap            |
|-----------------------------------------------------|------------------|------------------------|-----------------------|-------------------------|---------|----------------------|---------------|------------------------------|
| LIANG SILENCED BY METHYLATION 2                     | 55               | 16 (29.1)              | 16 (29.1)             | 0 (0)                   | <0.0001 | 0.0001               | 0.0364        | neu, mnc, dnc, tcl, nkc      |
| BOSCO TH1 CYTOTOXIC MODULE                          | 114              | 18 (15.8)              | 18 (15.8)             | 0 (0)                   | <0.0001 | 0.0001               | 0.0362        | neu, mnc, dnc                |
| FLECHNER BIOPSY KIDNEY TRANSPLANT REJECTED VS OK UP | 85               | 17 (20)                | 17 (20)               | 0 (0)                   | <0.0001 | 0.0001               | 0.0362        | neu, mnc, dnc, tcl, bcl      |
| SENGUPTA NASOPHARYNGEAL CARCINOMA UP                | 287              | 24 (8.4)               | 23 (8)                | 1 (0.3)                 | <0.0001 | 0.0001               | 0.0361        | neu, mnc, dnc                |
| CHARAFE BREAST CANCER LUMINAL VS BASAL DN           | 440              | 29 (6.6)               | 27 (6.1)              | 2 (0.5)                 | <0.0001 | 0.0001               | 0.0357        | neu, mnc, dnc, tcl           |
| LINDSTEDT DENDRITIC CELL MATURATION A               | 67               | 16 (23.9)              | 16 (23.9)             | 0 (0)                   | <0.0001 | 0.0001               | 0.0354        | neu, mnc, dnc, tcl           |
| MITSIADES RESPONSE TO APLIDIN UP                    | 450              | 29 (6.4)               | 28 (6.2)              | 1 (0.2)                 | <0.0001 | 0.0001               | 0.0353        | neu, mnc                     |
| MARTENS TRETINOIN RESPONSE UP                       | 816              | 41 (5)                 | 37 (4.5)              | 4 (0.5)                 | <0.0001 | 0.0001               | 0.0349        | dnc                          |
| SMID BREAST CANCER BASAL UP                         | 607              | 34 (5.6)               | 33 (5.4)              | 1 (0.2)                 | <0.0001 | 0.0001               | 0.0349        | neu, mnc, dnc, tcl           |
| DODD NASOPHARYNGEAL CARCINOMA DN                    | 1330             | 58 (4.4)               | 57 (4.3)              | 1 (0.1)                 | <0.0001 | 0.0001               | 0.0347        | neu, mnc, dnc, tcl           |
| GRUETZMANN PANCREATIC CANCER UP                     | 351              | 25 (7.1)               | 25 (7.1)              | 0 (0)                   | <0.0001 | 0.0001               | 0.0344        | neu, mnc, dnc, tcl, bcl      |
| UROSEVIC RESPONSE TO IMIQUIMOD                      | 23               | 14 (60.9)              | 14 (60.9)             | 0 (0)                   | <0.0001 | 0.0001               | 0.0341        | neu, mnc, dnc, tcl           |
| ZHU CMV ALL UP                                      | 121              | 17 (14)                | 17 (14)               | 0 (0)                   | <0.0001 | 0.0001               | 0.0337        | neu, mnc, dnc                |
| CHICAS RB1 TARGETS SENESCENT                        | 552              | 31 (5.6)               | 31 (5.6)              | 0 (0)                   | <0.0001 | 0.0001               | 0.0336        | neu, mnc, dnc                |
| VALK AML CLUSTER 5                                  | 30               | 14 (46.7)              | 14 (46.7)             | 0 (0)                   | <0.0001 | 0.0001               | 0.0336        |                              |
| KRIGE RESPONSE TO TOSEDOSTAT 24HR UP                | 740              | 37 (5)                 | 37 (5)                | 0 (0)                   | <0.0001 | 0.0001               | 0.0335        | neu, mnc, dnc                |
| KRIGE RESPONSE TO TOSEDOSTAT 6HR UP                 | 915              | 42 (4.6)               | 41 (4.5)              | 1 (0.1)                 | <0.0001 | 0.0001               | 0.0330        | neu, mnc, dnc                |
| SMID BREAST CANCER LUMINAL B DN                     | 513              | 29 (5.7)               | 28 (5.5)              | 1 (0.2)                 | <0.0001 | 0.0001               | 0.0328        | neu, mnc, dnc                |
| JOHNSTONE PARVB TARGETS 3 UP                        | 425              | 26 (6.1)               | 26 (6.1)              | 0 (0)                   | <0.0001 | 0.0001               | 0.0325        | neu, mnc, dnc, tcl           |
| SWEET LUNG CANCER KRAS DN                           | 425              | 26 (6.1)               | 25 (5.9)              | 1 (0.2)                 | <0.0001 | 0.0001               | 0.0325        | neu, mnc, dnc                |
| ZHU CMV 8 HR UP                                     | 48               | 14 (29.2)              | 14 (29.2)             | 0 (0)                   | <0.0001 | 0.0001               | 0.0322        | neu, mnc, dnc                |
| HELLER HDAC TARGETS SILENCED BY METHYLATION UP      | 439              | 26 (5.9)               | 25 (5.7)              | 1 (0.2)                 | <0.0001 | 0.0001               | 0.0319        | mnc                          |
| NEMETH INFLAMMATORY RESPONSE LPS UP                 | 85               | 15 (17.6)              | 15 (17.6)             | 0 (0)                   | <0.0001 | 0.0001               | 0.0318        | neu, mnc, dnc                |
| ZHOU INFLAMMATORY RESPONSE LIVE UP                  | 448              | 26 (5.8)               | 25 (5.6)              | 1 (0.2)                 | <0.0001 | 0.0001               | 0.0316        | mnc                          |
| ZHANG INTERFERON RESPONSE                           | 23               | 13 (56.5)              | 13 (56.5)             | 0 (0)                   | <0.0001 | 0.0001               | 0.0316        | neu, mnc, dnc, tcl, nkc, bcl |
| CHICAS RB1 TARGETS CONFLUENT                        | 550              | 29 (5.3)               | 26 (4.7)              | 3 (0.5)                 | <0.0001 | 0.0001               | 0.0315        | neu, mnc, dnc, tcl, bcl      |

Appendix "PBMC response to AS03-H5N1 vaccine"

Howard, Goll et al.

| Category Name                                      | Category Genes # | Any-reg. DE Genes #(%) | Up-reg. DE Genes #(%) | Down-reg. DE Genes #(%) | P-Value | FDR Adjusted P-Value | Jaccard Index | Cell Type Overlap            |
|----------------------------------------------------|------------------|------------------------|-----------------------|-------------------------|---------|----------------------|---------------|------------------------------|
| EINAV INTERFERON SIGNATURE IN CANCER               | 27               | 13 (48.1)              | 13 (48.1)             | 0 (0)                   | <0.0001 | 0.0001               | 0.0313        | neu, mnc, dnc, tcl, nkc, bcl |
| BAELDE DIABETIC NEPHROPATHY DN                     | 425              | 25 (5.9)               | 25 (5.9)              | 0 (0)                   | <0.0001 | 0.0001               | 0.0312        | neu, mnc, dnc, tcl           |
| WUNDER INFLAMMATORY RESPONSE AND CHOLESTEROL UP    | 61               | 14 (23)                | 14 (23)               | 0 (0)                   | <0.0001 | 0.0001               | 0.0312        | neu, mnc, dnc, tcl, nkc      |
| KATSANOUE ELAVL1 TARGETS UP                        | 163              | 17 (10.4)              | 16 (9.8)              | 1 (0.6)                 | <0.0001 | 0.0001               | 0.0311        | neu, mnc, dnc                |
| IVANOVA HEMATOPOIESIS LATE PROGENITOR              | 534              | 28 (5.2)               | 27 (5.1)              | 1 (0.2)                 | <0.0001 | 0.0001               | 0.0309        | neu                          |
| VECCHI GASTRIC CANCER ADVANCED VS EARLY UP         | 168              | 17 (10.1)              | 17 (10.1)             | 0 (0)                   | <0.0001 | 0.0001               | 0.0308        | mnc                          |
| JECHLINGER EPITHELIAL TO MESENCHYMAL TRANSITION UP | 71               | 14 (19.7)              | 13 (18.3)             | 1 (1.4)                 | <0.0001 | 0.0001               | 0.0306        | neu, mnc, dnc, tcl           |
| DER IFN GAMMA RESPONSE UP                          | 72               | 14 (19.4)              | 14 (19.4)             | 0 (0)                   | <0.0001 | 0.0001               | 0.0305        | neu, mnc, dnc, tcl, nkc, bcl |
| NAKAMURA TUMOR ZONE PERIPHERAL VS CENTRAL DN       | 615              | 30 (4.9)               | 28 (4.6)              | 2 (0.3)                 | <0.0001 | 0.0001               | 0.0304        |                              |
| MULLIGHAN MLL SIGNATURE 2 UP                       | 413              | 24 (5.8)               | 24 (5.8)              | 0 (0)                   | <0.0001 | 0.0001               | 0.0304        | neu                          |
| SWEET LUNG CANCER KRAS UP                          | 482              | 26 (5.4)               | 26 (5.4)              | 0 (0)                   | <0.0001 | 0.0001               | 0.0303        | neu                          |
| ACEVEDO FGFR1 TARGETS IN PROSTATE CANCER MODEL UP  | 278              | 20 (7.2)               | 18 (6.5)              | 2 (0.7)                 | <0.0001 | 0.0001               | 0.0303        | neu, mnc, dnc, tcl           |
| SENGUPTA NASOPHARYNGEAL CARCINOMA WITH LMP1 UP     | 387              | 23 (5.9)               | 22 (5.7)              | 1 (0.3)                 | <0.0001 | 0.0001               | 0.0301        | neu, mnc, dnc, tcl           |
| MASSARWEH TAMOXIFEN RESISTANCE UP                  | 561              | 28 (5)                 | 28 (5)                | 0 (0)                   | <0.0001 | 0.0001               | 0.0300        | neu, mnc, dnc                |
| BRUINS UVC RESPONSE VIA TP53 GROUP A               | 872              | 37 (4.2)               | 33 (3.8)              | 4 (0.5)                 | <0.0001 | 0.0001               | 0.0299        | mnc                          |
| RICKMAN METASTASIS DN                              | 258              | 19 (7.4)               | 19 (7.4)              | 0 (0)                   | <0.0001 | 0.0001               | 0.0297        | neu, mnc, dnc, tcl           |
| KIM GLIS2 TARGETS UP                               | 84               | 14 (16.7)              | 14 (16.7)             | 0 (0)                   | <0.0001 | 0.0001               | 0.0297        | neu, mnc, dnc, tcl           |
| PEDRIOLI MIR31 TARGETS DN                          | 398              | 23 (5.8)               | 22 (5.5)              | 1 (0.3)                 | <0.0001 | 0.0001               | 0.0296        | neu, mnc                     |
| PAPASPYRIDONOS UNSTABLE ATHEROSCLEROTIC PLAQUE UP  | 51               | 13 (25.5)              | 13 (25.5)             | 0 (0)                   | <0.0001 | 0.0001               | 0.0296        | tcl                          |
| BOWIE RESPONSE TO EXTRACELLULAR MATRIX             | 17               | 12 (70.6)              | 12 (70.6)             | 0 (0)                   | <0.0001 | 0.0001               | 0.0296        | neu, mnc, dnc, tcl, nkc, bcl |
| ENK UV RESPONSE EPIDERMIS UP                       | 298              | 20 (6.7)               | 20 (6.7)              | 0 (0)                   | <0.0001 | 0.0001               | 0.0295        | neu                          |
| BOWIE RESPONSE TO TAMOXIFEN                        | 18               | 12 (66.7)              | 12 (66.7)             | 0 (0)                   | <0.0001 | 0.0001               | 0.0295        | neu, mnc, dnc, tcl, nkc, bcl |
| TONKS TARGETS OF RUNX1 RUNX1T1 FUSION MONOCYTE UP  | 201              | 17 (8.5)               | 17 (8.5)              | 0 (0)                   | <0.0001 | 0.0001               | 0.0291        | neu, mnc, dnc, tcl           |
| FULCHER INFLAMMATORY RESPONSE LECTIN VS LPS UP     | 564              | 27 (4.8)               | 26 (4.6)              | 1 (0.2)                 | <0.0001 | 0.0001               | 0.0288        | neu, dnc                     |

| Category Name                                       | Category Genes # | Any-reg. DE Genes #(%) | Up-reg. DE Genes #(%) | Down-reg. DE Genes #(%) | P-Value | FDR Adjusted P-Value | Jaccard Index | Cell Type Overlap       |
|-----------------------------------------------------|------------------|------------------------|-----------------------|-------------------------|---------|----------------------|---------------|-------------------------|
| CHANG IMMORTALIZED BY HPV31 DN                      | 63               | 13 (20.6)              | 13 (20.6)             | 0 (0)                   | <0.0001 | 0.0001               | 0.0288        | neu, mnc, dnc, tcl      |
| KUMAR TARGETS OF MLL AF9 FUSION                     | 389              | 22 (5.7)               | 22 (5.7)              | 0 (0)                   | <0.0001 | 0.0001               | 0.0286        | neu, mnc, dnc           |
| LEE RECENT THYMIC EMIGRANT                          | 217              | 17 (7.8)               | 16 (7.4)              | 1 (0.5)                 | <0.0001 | 0.0001               | 0.0283        | neu, mnc, dnc, tcl      |
| GAUSSMANN MLL AF4 FUSION TARGETS F UP               | 182              | 16 (8.8)               | 14 (7.7)              | 2 (1.1)                 | <0.0001 | 0.0001               | 0.0282        | mnc                     |
| KRASNOSELSKAYA ILF3 TARGETS UP                      | 37               | 12 (32.4)              | 12 (32.4)             | 0 (0)                   | <0.0001 | 0.0001               | 0.0282        | neu, mnc, dnc, tcl      |
| ZWANG CLASS 3 TRANSIENTLY INDUCED BY EGF            | 220              | 17 (7.7)               | 17 (7.7)              | 0 (0)                   | <0.0001 | 0.0001               | 0.0281        | mnc                     |
| ZHAN MULTIPLE MYELOMA LB DN                         | 39               | 12 (30.8)              | 12 (30.8)             | 0 (0)                   | <0.0001 | 0.0001               | 0.0280        | neu, mnc, dnc, tcl, bcl |
| ODONNELL TFRC TARGETS UP                            | 409              | 22 (5.4)               | 19 (4.6)              | 3 (0.7)                 | <0.0001 | 0.0001               | 0.0279        | neu, mnc, dnc           |
| SATO SILENCED BY METHYLATION IN PANCREATIC CANCER 1 | 412              | 22 (5.3)               | 21 (5.1)              | 1 (0.2)                 | <0.0001 | 0.0001               | 0.0278        | neu, mnc                |
| LI INDUCED T TO NATURAL KILLER UP                   | 302              | 19 (6.3)               | 19 (6.3)              | 0 (0)                   | <0.0001 | 0.0001               | 0.0278        | neu, mnc, dnc           |
| MCBRYAN PUBERTAL BREAST 4 5WK UP                    | 264              | 18 (6.8)               | 15 (5.7)              | 3 (1.1)                 | <0.0001 | 0.0001               | 0.0278        | neu, dnc                |
| WANG SMARCE1 TARGETS DN                             | 340              | 20 (5.9)               | 20 (5.9)              | 0 (0)                   | <0.0001 | 0.0001               | 0.0277        | neu, mnc, dnc           |
| PEREZ TP53 TARGETS                                  | 1124             | 41 (3.6)               | 38 (3.4)              | 3 (0.3)                 | <0.0001 | 0.0001               | 0.0276        | neu, mnc, dnc           |
| LIM MAMMARY STEM CELL DN                            | 422              | 22 (5.2)               | 22 (5.2)              | 0 (0)                   | <0.0001 | 0.0001               | 0.0275        | neu, dnc, tcl           |
| MEISSNER BRAIN HCP WITH H3K4ME3 AND H3K27ME3        | 1060             | 39 (3.7)               | 35 (3.3)              | 4 (0.4)                 | <0.0001 | 0.0001               | 0.0274        | neu, mnc, dnc           |
| TARTE PLASMA CELL VS PLASMABLAST UP                 | 388              | 21 (5.4)               | 21 (5.4)              | 0 (0)                   | <0.0001 | 0.0001               | 0.0273        | mnc                     |
| DAUER STAT3 TARGETS UP                              | 50               | 12 (24)                | 12 (24)               | 0 (0)                   | <0.0001 | 0.0001               | 0.0273        | mnc, dnc, tcl           |
| STAMBOLSKY TARGETS OF MUTATED TP53 DN               | 51               | 12 (23.5)              | 12 (23.5)             | 0 (0)                   | <0.0001 | 0.0001               | 0.0273        | neu, mnc, dnc, tcl      |
| MARTINEZ RB1 AND TP53 TARGETS UP                    | 582              | 26 (4.5)               | 26 (4.5)              | 0 (0)                   | <0.0001 | 0.0001               | 0.0272        | mnc, dnc                |
| MARTINEZ TP53 TARGETS UP                            | 584              | 26 (4.5)               | 25 (4.3)              | 1 (0.2)                 | <0.0001 | 0.0001               | 0.0271        |                         |
| RUTELLA RESPONSE TO CSF2RB AND IL4 UP               | 319              | 19 (6)                 | 19 (6)                | 0 (0)                   | <0.0001 | 0.0001               | 0.0271        | neu, mnc, dnc           |
| HINATA NFKB TARGETS KERATINOCYTE UP                 | 91               | 13 (14.3)              | 13 (14.3)             | 0 (0)                   | <0.0001 | 0.0001               | 0.0271        | neu, mnc, dnc, tcl      |
| LIM MAMMARY STEM CELL UP                            | 474              | 23 (4.9)               | 20 (4.2)              | 3 (0.6)                 | <0.0001 | 0.0001               | 0.0270        |                         |
| WIERENGA STAT5A TARGETS UP                          | 210              | 16 (7.6)               | 16 (7.6)              | 0 (0)                   | <0.0001 | 0.0001               | 0.0269        | neu, mnc, dnc, tcl      |
| BOYLAN MULTIPLE MYELOMA PCA1 UP                     | 96               | 13 (13.5)              | 13 (13.5)             | 0 (0)                   | <0.0001 | 0.0001               | 0.0269        | neu, mnc, dnc           |
| BOQUEST STEM CELL DN                                | 213              | 16 (7.5)               | 16 (7.5)              | 0 (0)                   | <0.0001 | 0.0001               | 0.0268        | neu                     |
| ZWANG TRANSIENTLY UP BY 2ND EGF PULSE ONLY          | 1568             | 51 (3.3)               | 44 (2.8)              | 7 (0.4)                 | <0.0001 | 0.0001               | 0.0266        | mnc, dnc                |
| HUTTMANN B CLL POOR SURVIVAL UP                     | 258              | 17 (6.6)               | 17 (6.6)              | 0 (0)                   | <0.0001 | 0.0001               | 0.0265        | neu, mnc                |
| LINDGREN BLADDER CANCER CLUSTER 2B                  | 376              | 20 (5.3)               | 19 (5.1)              | 1 (0.3)                 | <0.0001 | 0.0001               | 0.0264        | neu, mnc                |

| Category Name                                    | Category Genes # | Any-reg. DE Genes #(%) | Up-reg. DE Genes #(%) | Down-reg. DE Genes #(%) | P-Value | FDR Adjusted P-Value | Jaccard Index | Cell Type Overlap           |
|--------------------------------------------------|------------------|------------------------|-----------------------|-------------------------|---------|----------------------|---------------|-----------------------------|
| CHIARADONNA NEOPLASTIC TRANSFORMATION KRAS DN    | 143              | 14 (9.8)               | 12 (8.4)              | 2 (1.4)                 | <0.0001 | 0.0001               | 0.0264        | neu, mnc, dnc               |
| GRAESSMANN RESPONSE TO MC AND DOXORUBICIN UP     | 615              | 26 (4.2)               | 23 (3.7)              | 3 (0.5)                 | <0.0001 | 0.0001               | 0.0263        | neu                         |
| HAN SATB1 TARGETS DN                             | 421              | 21 (5)                 | 21 (5)                | 0 (0)                   | <0.0001 | 0.0001               | 0.0262        | neu, mnc, dnc               |
| ZHOU INFLAMMATORY RESPONSE FIMA UP               | 504              | 23 (4.6)               | 22 (4.4)              | 1 (0.2)                 | <0.0001 | 0.0001               | 0.0261        | mnc                         |
| KRIEG KDM3A TARGETS NOT HYPOXIA                  | 189              | 15 (7.9)               | 15 (7.9)              | 0 (0)                   | <0.0001 | 0.0001               | 0.0261        | neu, mnc, dnc, tcl, nk, bcl |
| FARMER BREAST CANCER APOCRINE VS LUMINAL         | 312              | 18 (5.8)               | 17 (5.4)              | 1 (0.3)                 | <0.0001 | 0.0001               | 0.0259        |                             |
| PLASARI TGFB1 TARGETS 10HR DN                    | 233              | 16 (6.9)               | 16 (6.9)              | 0 (0)                   | <0.0001 | 0.0001               | 0.0259        | neu, mnc, dnc, tcl, nk, bcl |
| MIKKELSEN MCV6 LCP WITH H3K4ME3                  | 153              | 14 (9.2)               | 14 (9.2)              | 0 (0)                   | <0.0001 | 0.0001               | 0.0259        | neu, mnc, dnc, tcl          |
| BUYTAERT PHOTODYNAMIC THERAPY STRESS UP          | 795              | 30 (3.8)               | 29 (3.6)              | 1 (0.1)                 | <0.0001 | 0.0001               | 0.0257        |                             |
| SENESE HDAC3 TARGETS UP                          | 477              | 22 (4.6)               | 21 (4.4)              | 1 (0.2)                 | <0.0001 | 0.0001               | 0.0257        | mnc                         |
| PETROVA ENDOTHELIUM LYMPHATIC VS BLOOD DN        | 157              | 14 (8.9)               | 13 (8.3)              | 1 (0.6)                 | <0.0001 | 0.0001               | 0.0257        | neu, mnc                    |
| MARKEY RB1 CHRONIC LOF DN                        | 118              | 13 (11)                | 12 (10.2)             | 1 (0.8)                 | <0.0001 | 0.0001               | 0.0257        |                             |
| SCHLOSSER SERUM RESPONSE DN                      | 680              | 27 (4)                 | 27 (4)                | 0 (0)                   | <0.0001 | 0.0001               | 0.0256        | neu                         |
| MAHAJAN RESPONSE TO IL1A UP                      | 79               | 12 (15.2)              | 11 (13.9)             | 1 (1.3)                 | <0.0001 | 0.0001               | 0.0256        | neu, mnc                    |
| CREIGHTON ENDOCRINE THERAPY RESISTANCE 3         | 696              | 27 (3.9)               | 25 (3.6)              | 2 (0.3)                 | <0.0001 | 0.0001               | 0.0252        | neu, mnc                    |
| TAVOR CEBPA TARGETS UP                           | 47               | 11 (23.4)              | 11 (23.4)             | 0 (0)                   | <0.0001 | 0.0001               | 0.0252        | neu, mnc                    |
| ENK UV RESPONSE EPIDERMIS DN                     | 496              | 22 (4.4)               | 19 (3.8)              | 3 (0.6)                 | <0.0001 | 0.0001               | 0.0251        | mnc                         |
| YAMAZAKI TCEB3 TARGETS UP                        | 172              | 14 (8.1)               | 12 (7)                | 2 (1.2)                 | <0.0001 | 0.0001               | 0.0250        | mnc                         |
| COLINA TARGETS OF 4EBP1 AND 4EBP2                | 339              | 18 (5.3)               | 18 (5.3)              | 0 (0)                   | <0.0001 | 0.0001               | 0.0249        | neu, mnc, dnc, tcl, bcl     |
| ZHU CMV 24 HR UP                                 | 93               | 12 (12.9)              | 12 (12.9)             | 0 (0)                   | <0.0001 | 0.0001               | 0.0249        | neu, mnc, dnc, tcl          |
| HAHTOLA SEZARY SYNDROM UP                        | 94               | 12 (12.8)              | 12 (12.8)             | 0 (0)                   | <0.0001 | 0.0001               | 0.0248        |                             |
| BASSO CD40 SIGNALING UP                          | 99               | 12 (12.1)              | 12 (12.1)             | 0 (0)                   | <0.0001 | 0.0001               | 0.0246        | neu, dnc, tcl               |
| NADLER OBESITY UP                                | 59               | 11 (18.6)              | 10 (16.9)             | 1 (1.7)                 | <0.0001 | 0.0001               | 0.0245        |                             |
| SMID BREAST CANCER NORMAL LIKE UP                | 443              | 20 (4.5)               | 19 (4.3)              | 1 (0.2)                 | <0.0001 | 0.0001               | 0.0243        | neu, mnc, dnc               |
| FLECHNER BIOPSY KIDNEY TRANSPLANT OK VS DONOR UP | 529              | 22 (4.2)               | 22 (4.2)              | 0 (0)                   | <0.0001 | 0.0001               | 0.0242        | neu, mnc                    |
| KEEN RESPONSE TO ROSIGLITAZONE DN                | 106              | 12 (11.3)              | 12 (11.3)             | 0 (0)                   | <0.0001 | 0.0001               | 0.0242        | neu, dnc                    |
| WANG MLL TARGETS                                 | 280              | 16 (5.7)               | 16 (5.7)              | 0 (0)                   | <0.0001 | 0.0001               | 0.0241        | mnc, dnc                    |
| GROSS HYPOXIA VIA ELK3 DN                        | 151              | 13 (8.6)               | 12 (7.9)              | 1 (0.7)                 | <0.0001 | 0.0001               | 0.0241        |                             |
| GRAHAM NORMAL QUIESCENT VS NORMAL DIVIDING UP    | 66               | 11 (16.7)              | 10 (15.2)             | 1 (1.5)                 | <0.0001 | 0.0001               | 0.0241        | dnc                         |
| XU AKT1 TARGETS 6HR                              | 27               | 10 (37)                | 10 (37)               | 0 (0)                   | <0.0001 | 0.0001               | 0.0239        | neu, mnc, dnc               |
| CHYLA CBFA2T3 TARGETS UP                         | 372              | 18 (4.8)               | 18 (4.8)              | 0 (0)                   | <0.0001 | 0.0001               | 0.0238        |                             |

Appendix "PBMC response to AS03-H5N1 vaccine"

Howard, Goll et al.

| Category Name                                   | Category<br>Genes # | Any-reg. DE<br>Genes #(%) | Up-reg.<br>DE Genes<br>#(%) | Down-reg.<br>DE Genes<br>#(%) | P-Value | FDR    | Jaccard<br>Index | Cell Type Over-<br>lap     |
|-------------------------------------------------|---------------------|---------------------------|-----------------------------|-------------------------------|---------|--------|------------------|----------------------------|
| YOSHIMURA MAPK8 TARGETS UP                      | 1281                | 39 (3)                    | 35 (2.7)                    | 4 (0.3)                       | <0.0001 | 0.0001 | 0.0237           | mnc, dnc                   |
| BILD HRAS ONCOGENIC SIGNATURE                   | 250                 | 15 (6)                    | 15 (6)                      | 0 (0)                         | <0.0001 | 0.0001 | 0.0236           |                            |
| GHANDHI BYSTANDER IRRADIATION UP                | 78                  | 11 (14.1)                 | 11 (14.1)                   | 0 (0)                         | <0.0001 | 0.0001 | 0.0235           | neu, mnc                   |
| GEISS RESPONSE TO DSRNA UP                      | 35                  | 10 (28.6)                 | 10 (28.6)                   | 0 (0)                         | <0.0001 | 0.0001 | 0.0235           | neu, mnc, dnc,<br>bcl      |
| LEE AGING CEREBELLUM UP                         | 81                  | 11 (13.6)                 | 11 (13.6)                   | 0 (0)                         | <0.0001 | 0.0001 | 0.0234           | mnc, dnc                   |
| IZADPANAH STEM CELL ADIPOSE VS BONE UP          | 125                 | 12 (9.6)                  | 12 (9.6)                    | 0 (0)                         | <0.0001 | 0.0001 | 0.0233           | neu, mnc                   |
| GALINDO IMMUNE RESPONSE TO ENTEROTOXIN          | 85                  | 11 (12.9)                 | 11 (12.9)                   | 0 (0)                         | <0.0001 | 0.0001 | 0.0232           | tcl                        |
| CAIRO LIVER DEVELOPMENT DN                      | 219                 | 14 (6.4)                  | 14 (6.4)                    | 0 (0)                         | <0.0001 | 0.0001 | 0.0231           |                            |
| KHETCHOUMIAN TRIM24 TARGETS UP                  | 45                  | 10 (22.2)                 | 10 (22.2)                   | 0 (0)                         | <0.0001 | 0.0001 | 0.0229           | dnc, tcl                   |
| DOANE RESPONSE TO ANDROGEN DN                   | 232                 | 14 (6)                    | 14 (6)                      | 0 (0)                         | <0.0001 | 0.0001 | 0.0226           | neu, mnc                   |
| ZHENG IL22 SIGNALING UP                         | 56                  | 10 (17.9)                 | 10 (17.9)                   | 0 (0)                         | <0.0001 | 0.0001 | 0.0224           | mnc, dnc                   |
| SARRIO EPITHELIAL MESENCHYMAL TRANSITION DN     | 149                 | 12 (8.1)                  | 12 (8.1)                    | 0 (0)                         | <0.0001 | 0.0001 | 0.0223           | neu, mnc, dnc              |
| GHANDHI DIRECT IRRADIATION UP                   | 106                 | 11 (10.4)                 | 11 (10.4)                   | 0 (0)                         | <0.0001 | 0.0001 | 0.0222           | mnc                        |
| ROETH TERT TARGETS UP                           | 14                  | 9 (64.3)                  | 9 (64.3)                    | 0 (0)                         | <0.0001 | 0.0001 | 0.0222           | neu, mnc, dnc,<br>tcl, nkc |
| CASTELLANO NRAS TARGETS UP                      | 68                  | 10 (14.7)                 | 10 (14.7)                   | 0 (0)                         | <0.0001 | 0.0001 | 0.0218           | neu, mnc, dnc,<br>tcl      |
| AFFAR YY1 TARGETS UP                            | 212                 | 13 (6.1)                  | 11 (5.2)                    | 2 (0.9)                       | <0.0001 | 0.0001 | 0.0217           |                            |
| MIKKELSEN MEF LCP WITH H3K4ME3                  | 121                 | 11 (9.1)                  | 11 (9.1)                    | 0 (0)                         | <0.0001 | 0.0001 | 0.0215           | neu, mnc, dnc              |
| JACKSON DNMT1 TARGETS UP                        | 76                  | 10 (13.2)                 | 10 (13.2)                   | 0 (0)                         | <0.0001 | 0.0001 | 0.0214           | neu, mnc, dnc,<br>tcl      |
| MCBRYAN PUBERTAL BREAST 6 7WK DN                | 77                  | 10 (13)                   | 10 (13)                     | 0 (0)                         | <0.0001 | 0.0001 | 0.0214           |                            |
| HUANG DASATINIB RESISTANCE UP                   | 79                  | 10 (12.7)                 | 9 (11.4)                    | 1 (1.3)                       | <0.0001 | 0.0001 | 0.0213           | neu, dnc                   |
| KIM LRRC3B TARGETS                              | 30                  | 9 (30)                    | 9 (30)                      | 0 (0)                         | <0.0001 | 0.0001 | 0.0213           | neu, mnc, dnc              |
| GERY CEBP TARGETS                               | 137                 | 11 (8)                    | 11 (8)                      | 0 (0)                         | <0.0001 | 0.0001 | 0.0209           | neu, mnc                   |
| ROSS AML WITH CBFβ MYH11 FUSION                 | 48                  | 9 (18.8)                  | 9 (18.8)                    | 0 (0)                         | <0.0001 | 0.0001 | 0.0205           |                            |
| BROWNE HCMV INFECTION 8HR UP                    | 102                 | 10 (9.8)                  | 10 (9.8)                    | 0 (0)                         | <0.0001 | 0.0001 | 0.0203           | neu, mnc                   |
| LINDSTEDT DENDRITIC CELL MATURATION B           | 51                  | 9 (17.6)                  | 9 (17.6)                    | 0 (0)                         | <0.0001 | 0.0001 | 0.0203           | neu, mnc                   |
| DEMAGALHAES AGING UP                            | 56                  | 9 (16.1)                  | 9 (16.1)                    | 0 (0)                         | <0.0001 | 0.0001 | 0.0201           | neu, mnc, dnc              |
| WANG ESOPHAGUS CANCER VS NORMAL UP              | 118                 | 10 (8.5)                  | 10 (8.5)                    | 0 (0)                         | <0.0001 | 0.0001 | 0.0196           | neu, mnc, dnc              |
| GRANDVAUX IRF3 TARGETS UP                       | 15                  | 8 (53.3)                  | 8 (53.3)                    | 0 (0)                         | <0.0001 | 0.0001 | 0.0196           | neu, mnc, dnc,<br>tcl, nkc |
| BOYLAN MULTIPLE MYELOMA D DN                    | 71                  | 9 (12.7)                  | 9 (12.7)                    | 0 (0)                         | <0.0001 | 0.0001 | 0.0194           | neu                        |
| THEILGAARD NEUTROPHIL AT SKIN WOUND UP          | 76                  | 9 (11.8)                  | 9 (11.8)                    | 0 (0)                         | <0.0001 | 0.0001 | 0.0192           |                            |
| HELLEBREKERS SILENCED DURING TUMOR ANGIOGENESIS | 78                  | 9 (11.5)                  | 8 (10.3)                    | 1 (1.3)                       | <0.0001 | 0.0001 | 0.0191           |                            |



| Category Name                               | Category<br>Genes # | Any-reg. DE<br>Genes #(%) | Up-reg.<br>DE Genes<br>#(%) | Down-reg.<br>DE Genes<br>#(%) | P-Value | FDR<br>Ad-<br>justed<br>P-Value | Jaccard<br>Index | Cell Type Over-<br>lap          |
|---------------------------------------------|---------------------|---------------------------|-----------------------------|-------------------------------|---------|---------------------------------|------------------|---------------------------------|
| AMIT SERUM RESPONSE 40 MCF10A               | 31                  | 8 (25.8)                  | 8 (25.8)                    | 0 (0)                         | <0.0001 | 0.0001                          | 0.0189           |                                 |
| GRAHAM CML DIVIDING VS NORMAL QUIESCENT DN  | 88                  | 9 (10.2)                  | 8 (9.1)                     | 1 (1.1)                       | <0.0001 | 0.0001                          | 0.0188           | neu                             |
| UZONYI RESPONSE TO LEUKOTRIENE AND THROMBIN | 37                  | 8 (21.6)                  | 8 (21.6)                    | 0 (0)                         | <0.0001 | 0.0001                          | 0.0186           | neu                             |
| KAAB FAILED HEART VENTRICLE DN              | 41                  | 8 (19.5)                  | 8 (19.5)                    | 0 (0)                         | <0.0001 | 0.0001                          | 0.0184           | neu, mnc, dnc                   |
| MCDOWELL ACUTE LUNG INJURY UP               | 43                  | 8 (18.6)                  | 8 (18.6)                    | 0 (0)                         | <0.0001 | 0.0001                          | 0.0183           |                                 |
| ABBUD LIF SIGNALING 1 UP                    | 46                  | 8 (17.4)                  | 8 (17.4)                    | 0 (0)                         | <0.0001 | 0.0001                          | 0.0182           | tcl                             |
| BROWNE HCMV INFECTION 4HR UP                | 53                  | 8 (15.1)                  | 8 (15.1)                    | 0 (0)                         | <0.0001 | 0.0001                          | 0.0179           | neu, mnc, dnc                   |
| GRAHAM CML QUIESCENT VS NORMAL DIVIDING UP  | 55                  | 8 (14.5)                  | 8 (14.5)                    | 0 (0)                         | <0.0001 | 0.0001                          | 0.0179           | mnc, tcl                        |
| WORSCHER TUMOR REJECTION UP                 | 53                  | 8 (15.1)                  | 7 (13.2)                    | 1 (1.9)                       | <0.0001 | 0.0001                          | 0.0179           |                                 |
| LEE LIVER CANCER E2F1 UP                    | 62                  | 8 (12.9)                  | 7 (11.3)                    | 1 (1.6)                       | <0.0001 | 0.0001                          | 0.0176           | mnc, dnc                        |
| PHONG TNF TARGETS UP                        | 62                  | 8 (12.9)                  | 8 (12.9)                    | 0 (0)                         | <0.0001 | 0.0001                          | 0.0176           |                                 |
| MCBRYAN PUBERTAL TGFB1 TARGETS DN           | 65                  | 8 (12.3)                  | 8 (12.3)                    | 0 (0)                         | <0.0001 | 0.0001                          | 0.0175           | neu, mnc                        |
| PETROVA PROX1 TARGETS DN                    | 64                  | 8 (12.5)                  | 7 (10.9)                    | 1 (1.6)                       | <0.0001 | 0.0001                          | 0.0175           |                                 |
| BROWNE HCMV INFECTION 6HR UP                | 69                  | 8 (11.6)                  | 8 (11.6)                    | 0 (0)                         | <0.0001 | 0.0001                          | 0.0173           | neu                             |
| FURUKAWA DUSP6 TARGETS PCI35 UP             | 73                  | 8 (11)                    | 7 (9.6)                     | 1 (1.4)                       | <0.0001 | 0.0001                          | 0.0172           | neu, mnc, dnc,<br>tcl           |
| GRANDVAUX IFN RESPONSE NOT VIA IRF3         | 14                  | 7 (50)                    | 7 (50)                      | 0 (0)                         | <0.0001 | 0.0001                          | 0.0172           | neu, mnc, dnc,<br>tcl, nkc, bcl |
| ROSS AML WITH MLL FUSIONS                   | 76                  | 8 (10.5)                  | 7 (9.2)                     | 1 (1.3)                       | <0.0001 | 0.0001                          | 0.0171           | mnc                             |
| XU HGF TARGETS INDUCED BY AKT1 6HR          | 18                  | 7 (38.9)                  | 7 (38.9)                    | 0 (0)                         | <0.0001 | 0.0001                          | 0.0170           | neu, mnc, dnc                   |
| MAHADEVAN RESPONSE TO MP470 UP              | 19                  | 7 (36.8)                  | 7 (36.8)                    | 0 (0)                         | <0.0001 | 0.0001                          | 0.0169           | neu, mnc, dnc,<br>tcl           |
| NIELSEN SYNOVIAL SARCOMA DN                 | 19                  | 7 (36.8)                  | 7 (36.8)                    | 0 (0)                         | <0.0001 | 0.0001                          | 0.0169           | neu, mnc, dnc                   |
| DAVIES MULTIPLE MYELOMA VS MGUS DN          | 26                  | 7 (26.9)                  | 7 (26.9)                    | 0 (0)                         | <0.0001 | 0.0001                          | 0.0167           |                                 |
| YAN ESCAPE FROM ANOIKIS                     | 24                  | 7 (29.2)                  | 7 (29.2)                    | 0 (0)                         | <0.0001 | 0.0001                          | 0.0167           | neu, mnc, dnc,<br>tcl, nkc, bcl |
| LU TUMOR VASCULATURE UP                     | 27                  | 7 (25.9)                  | 6 (22.2)                    | 1 (3.7)                       | <0.0001 | 0.0001                          | 0.0166           | mnc                             |
| WILENSKY RESPONSE TO DARAPLADIB             | 27                  | 7 (25.9)                  | 7 (25.9)                    | 0 (0)                         | <0.0001 | 0.0001                          | 0.0166           |                                 |
| ZHANG ANTIVIRAL RESPONSE TO RIBAVIRIN UP    | 29                  | 7 (24.1)                  | 7 (24.1)                    | 0 (0)                         | <0.0001 | 0.0001                          | 0.0165           | neu, mnc, dnc                   |
| ZHAN MULTIPLE MYELOMA DN                    | 39                  | 7 (17.9)                  | 7 (17.9)                    | 0 (0)                         | <0.0001 | 0.0001                          | 0.0162           |                                 |
| PARK APL PATHOGENESIS DN                    | 47                  | 7 (14.9)                  | 7 (14.9)                    | 0 (0)                         | <0.0001 | 0.0001                          | 0.0159           |                                 |
| BECKER TAMOXIFEN RESISTANCE UP              | 49                  | 7 (14.3)                  | 7 (14.3)                    | 0 (0)                         | <0.0001 | 0.0001                          | 0.0158           | neu, mnc, dnc                   |
| TSAI DNAJB4 TARGETS UP                      | 13                  | 6 (46.2)                  | 6 (46.2)                    | 0 (0)                         | <0.0001 | 0.0001                          | 0.0147           | neu, mnc, dnc,<br>tcl, nkc      |
| MURATA VIRULENCE OF H PILORI                | 23                  | 6 (26.1)                  | 6 (26.1)                    | 0 (0)                         | <0.0001 | 0.0001                          | 0.0144           | mnc, dnc                        |
| LIAN NEUTROPHIL GRANULE CONSTITUENTS        | 24                  | 6 (25)                    | 6 (25)                      | 0 (0)                         | <0.0001 | 0.0001                          | 0.0143           |                                 |

| Category Name                                                          | Category<br>Genes # | Any-reg. DE<br>Genes #(%) | Up-reg.<br>DE Genes<br>#(%) | Down-reg.<br>DE Genes<br>#(%) | P-Value | FDR<br>Ad-<br>justed<br>P-Value | Jaccard<br>Index | Cell Type Over-<br>lap     |
|------------------------------------------------------------------------|---------------------|---------------------------|-----------------------------|-------------------------------|---------|---------------------------------|------------------|----------------------------|
| BOYAULT LIVER CANCER SUBCLASS G5 DN                                    | 27                  | 6 (22.2)                  | 6 (22.2)                    | 0 (0)                         | <0.0001 | 0.0001                          | 0.0142           | neu, dnc, tcl              |
| APPEL IMATINIB RESPONSE                                                | 32                  | 6 (18.8)                  | 6 (18.8)                    | 0 (0)                         | <0.0001 | 0.0001                          | 0.0141           |                            |
| TAKEDA TARGETS OF NUP98 HOXA9 FUSION 3D DN                             | 30                  | 6 (20)                    | 6 (20)                      | 0 (0)                         | <0.0001 | 0.0001                          | 0.0141           |                            |
| BOHN PRIMARY IMMUNODEFICIENCY SYNDROM DN                               | 39                  | 6 (15.4)                  | 6 (15.4)                    | 0 (0)                         | <0.0001 | 0.0001                          | 0.0138           |                            |
| LU TUMOR ENDOTHELIAL MARKERS UP                                        | 20                  | 5 (25)                    | 4 (20)                      | 1 (5)                         | <0.0001 | 0.0001                          | 0.0120           |                            |
| HAHTOLA CTCL CUTANEOUS                                                 | 25                  | 5 (20)                    | 5 (20)                      | 0 (0)                         | <0.0001 | 0.0001                          | 0.0119           |                            |
| RUAN RESPONSE TO TNF UP                                                | 12                  | 4 (33.3)                  | 4 (33.3)                    | 0 (0)                         | <0.0001 | 0.0001                          | 0.0098           | mnc, dnc, tcl,<br>nkc, bcl |
| DURAND STROMA MAX UP                                                   | 270                 | 17 (6.3)                  | 16 (5.9)                    | 1 (0.4)                       | <0.0001 | 0.0002                          | 0.0260           | neu, mnc, dnc,<br>bcl      |
| CHARAFE BREAST CANCER LUMINAL VS MESENCHYMAL DN                        | 447                 | 21 (4.7)                  | 18 (4)                      | 3 (0.7)                       | <0.0001 | 0.0002                          | 0.0254           | mnc                        |
| FORTSCHEGGER PHF8 TARGETS DN                                           | 749                 | 28 (3.7)                  | 24 (3.2)                    | 4 (0.5)                       | <0.0001 | 0.0002                          | 0.0250           | neu, mnc                   |
| DUTERTRE ESTRADIOL RESPONSE 24HR DN                                    | 502                 | 22 (4.4)                  | 22 (4.4)                    | 0 (0)                         | <0.0001 | 0.0002                          | 0.0250           | neu, mnc                   |
| MIYAGAWA TARGETS OF EWSR1 ETS FUSIONS UP                               | 247                 | 15 (6.1)                  | 15 (6.1)                    | 0 (0)                         | <0.0001 | 0.0002                          | 0.0237           | neu, tcl, bcl              |
| CHIANG LIVER CANCER SUBCLASS CTNNB1 DN                                 | 161                 | 13 (8.1)                  | 12 (7.5)                    | 1 (0.6)                       | <0.0001 | 0.0002                          | 0.0237           |                            |
| SERVITJA ISLET HNF1A TARGETS UP                                        | 160                 | 13 (8.1)                  | 13 (8.1)                    | 0 (0)                         | <0.0001 | 0.0002                          | 0.0237           | mnc, dnc                   |
| ZWANG TRANSIENTLY UP BY 1ST EGF PULSE ONLY                             | 1723                | 48 (2.8)                  | 45 (2.6)                    | 3 (0.2)                       | <0.0001 | 0.0002                          | 0.0231           | neu, mnc, dnc,<br>tcl, bcl |
| RODWELL AGING KIDNEY NO BLOOD UP                                       | 213                 | 13 (6.1)                  | 10 (4.7)                    | 3 (1.4)                       | <0.0001 | 0.0002                          | 0.0216           | dnc                        |
| RASHI RESPONSE TO IONIZING RADIATION 2                                 | 126                 | 11 (8.7)                  | 11 (8.7)                    | 0 (0)                         | <0.0001 | 0.0002                          | 0.0213           | neu                        |
| CONCANNON APOPTOSIS BY EPOXOMICIN UP                                   | 227                 | 13 (5.7)                  | 13 (5.7)                    | 0 (0)                         | <0.0001 | 0.0002                          | 0.0211           | neu                        |
| TONKS TARGETS OF RUNX1 RUNX1T1 FUSION HSC UP                           | 180                 | 12 (6.7)                  | 11 (6.1)                    | 1 (0.6)                       | <0.0001 | 0.0002                          | 0.0211           | neu                        |
| JOHNSTONE PARVB TARGETS 2 UP                                           | 136                 | 11 (8.1)                  | 11 (8.1)                    | 0 (0)                         | <0.0001 | 0.0002                          | 0.0209           | neu, mnc, dnc              |
| HUANG GATA2 TARGETS UP                                                 | 146                 | 11 (7.5)                  | 11 (7.5)                    | 0 (0)                         | <0.0001 | 0.0002                          | 0.0205           | neu, dnc                   |
| TSAI RESPONSE TO IONIZING RADIATION                                    | 146                 | 11 (7.5)                  | 11 (7.5)                    | 0 (0)                         | <0.0001 | 0.0002                          | 0.0205           | dnc                        |
| DARWICHE SQUAMOUS CELL CARCINOMA UP                                    | 143                 | 10 (7)                    | 10 (7)                      | 0 (0)                         | <0.0001 | 0.0002                          | 0.0187           | neu                        |
| WINZEN DEGRADED VIA KHSRP                                              | 101                 | 9 (8.9)                   | 7 (6.9)                     | 2 (2)                         | <0.0001 | 0.0002                          | 0.0183           |                            |
| GROSS HYPOXIA VIA HIF1A DN                                             | 107                 | 9 (8.4)                   | 8 (7.5)                     | 1 (0.9)                       | <0.0001 | 0.0002                          | 0.0180           |                            |
| NAGASHIMA EGF SIGNALING UP                                             | 59                  | 8 (13.6)                  | 8 (13.6)                    | 0 (0)                         | <0.0001 | 0.0002                          | 0.0177           |                            |
| COATES MACROPHAGE M1 VS M2 UP                                          | 81                  | 8 (9.9)                   | 7 (8.6)                     | 1 (1.2)                       | <0.0001 | 0.0002                          | 0.0169           |                            |
| HAN JNK SINGALING UP                                                   | 34                  | 7 (20.6)                  | 7 (20.6)                    | 0 (0)                         | <0.0001 | 0.0002                          | 0.0164           | neu, mnc, dnc,<br>tcl, bcl |
| TONKS TARGETS OF RUNX1 RUNX1T1 FUSION SUSTAINED IN ERY-<br>THROCYTE UP | 42                  | 7 (16.7)                  | 6 (14.3)                    | 1 (2.4)                       | <0.0001 | 0.0002                          | 0.0161           |                            |
| FAELT B CLL WITH VH REARRANGEMENTS UP                                  | 46                  | 7 (15.2)                  | 7 (15.2)                    | 0 (0)                         | <0.0001 | 0.0002                          | 0.0159           | neu                        |
| BROWNE HCMV INFECTION 30MIN UP                                         | 51                  | 7 (13.7)                  | 7 (13.7)                    | 0 (0)                         | <0.0001 | 0.0002                          | 0.0157           | dnc                        |
| LEE LIVER CANCER CIPROFIBRATE UP                                       | 58                  | 7 (12.1)                  | 6 (10.3)                    | 1 (1.7)                       | <0.0001 | 0.0002                          | 0.0155           |                            |

| Category Name                                  | Category<br>Genes # | Any-reg. DE<br>Genes #(%) | Up-reg.<br>DE Genes<br>#(%) | Down-reg.<br>DE Genes<br>#(%) | P-Value | FDR<br>Ad-<br>justed<br>P-Value | Jaccard<br>Index | Cell Type Over-<br>lap |
|------------------------------------------------|---------------------|---------------------------|-----------------------------|-------------------------------|---------|---------------------------------|------------------|------------------------|
| LIM MAMMARY LUMINAL PROGENITOR UP              | 59                  | 7 (11.9)                  | 7 (11.9)                    | 0 (0)                         | <0.0001 | 0.0002                          | 0.0155           |                        |
| SHIN B CELL LYMPHOMA CLUSTER 8                 | 36                  | 6 (16.7)                  | 6 (16.7)                    | 0 (0)                         | <0.0001 | 0.0002                          | 0.0139           | tcl                    |
| SHIPP DLBCL VS FOLLICULAR LYMPHOMA UP          | 44                  | 6 (13.6)                  | 6 (13.6)                    | 0 (0)                         | <0.0001 | 0.0002                          | 0.0137           |                        |
| LEE SP4 THYMOCYTE                              | 14                  | 5 (35.7)                  | 4 (28.6)                    | 1 (7.1)                       | <0.0001 | 0.0002                          | 0.0122           | mnc, tcl               |
| RIGGI EWING SARCOMA PROGENITOR UP              | 429                 | 19 (4.4)                  | 18 (4.2)                    | 1 (0.2)                       | <0.0001 | 0.0003                          | 0.0234           | neu                    |
| BASAKI YBX1 TARGETS DN                         | 361                 | 17 (4.7)                  | 15 (4.2)                    | 2 (0.6)                       | <0.0001 | 0.0003                          | 0.0228           | neu, mnc               |
| WEST ADRENOCORTICAL TUMOR DN                   | 508                 | 20 (3.9)                  | 20 (3.9)                    | 0 (0)                         | <0.0001 | 0.0003                          | 0.0225           |                        |
| ZHENG GLIOBLASTOMA PLASTICITY UP               | 252                 | 14 (5.6)                  | 10 (4)                      | 4 (1.6)                       | <0.0001 | 0.0003                          | 0.0219           | dnc                    |
| WANG CISPLATIN RESPONSE AND XPC DN             | 223                 | 13 (5.8)                  | 13 (5.8)                    | 0 (0)                         | <0.0001 | 0.0003                          | 0.0213           |                        |
| VERHAAK AML WITH NPM1 MUTATED DN               | 238                 | 13 (5.5)                  | 11 (4.6)                    | 2 (0.8)                       | <0.0001 | 0.0003                          | 0.0208           | neu, mnc, dnc,<br>tcl  |
| FOSTER KDM1A TARGETS UP                        | 250                 | 13 (5.2)                  | 12 (4.8)                    | 1 (0.4)                       | <0.0001 | 0.0003                          | 0.0204           | neu, mnc, dnc          |
| KOKKINAKIS METHIONINE DEPRIVATION 48HR UP      | 126                 | 10 (7.9)                  | 10 (7.9)                    | 0 (0)                         | <0.0001 | 0.0003                          | 0.0193           |                        |
| TAKEDA TARGETS OF NUP98 HOXA9 FUSION 10D DN    | 135                 | 10 (7.4)                  | 10 (7.4)                    | 0 (0)                         | <0.0001 | 0.0003                          | 0.0190           | neu, mnc, dnc          |
| KOBAYASHI EGFR SIGNALING 24HR UP               | 110                 | 9 (8.2)                   | 9 (8.2)                     | 0 (0)                         | <0.0001 | 0.0003                          | 0.0179           | neu                    |
| HUMMERICH SKIN CANCER PROGRESSION UP           | 87                  | 8 (9.2)                   | 8 (9.2)                     | 0 (0)                         | <0.0001 | 0.0003                          | 0.0167           | neu                    |
| LEE LIVER CANCER MYC E2F1 UP                   | 56                  | 7 (12.5)                  | 7 (12.5)                    | 0 (0)                         | <0.0001 | 0.0003                          | 0.0156           | neu, mnc, dnc          |
| ZHAN MULTIPLE MYELOMA CD1 VS CD2 UP            | 64                  | 7 (10.9)                  | 6 (9.4)                     | 1 (1.6)                       | <0.0001 | 0.0003                          | 0.0153           | neu                    |
| PEPPER CHRONIC LYMPHOCYTIC LEUKEMIA UP         | 45                  | 6 (13.3)                  | 6 (13.3)                    | 0 (0)                         | <0.0001 | 0.0003                          | 0.0136           |                        |
| CUI TCF21 TARGETS 2 DN                         | 813                 | 29 (3.6)                  | 28 (3.4)                    | 1 (0.1)                       | <0.0001 | 0.0004                          | 0.0245           | neu                    |
| KRIEG HYPOXIA NOT VIA KDM3A                    | 718                 | 26 (3.6)                  | 25 (3.5)                    | 1 (0.1)                       | <0.0001 | 0.0004                          | 0.0238           | neu, mnc, dnc          |
| RICKMAN TUMOR DIFFERENTIATED WELL VS POORLY DN | 380                 | 18 (4.7)                  | 17 (4.5)                    | 1 (0.3)                       | <0.0001 | 0.0004                          | 0.0236           |                        |
| LEI MYB TARGETS                                | 307                 | 16 (5.2)                  | 15 (4.9)                    | 1 (0.3)                       | <0.0001 | 0.0004                          | 0.0231           | neu, mnc, dnc          |
| GOLDRATH ANTIGEN RESPONSE                      | 333                 | 16 (4.8)                  | 16 (4.8)                    | 0 (0)                         | <0.0001 | 0.0004                          | 0.0223           | neu                    |
| MARTINEZ RB1 TARGETS DN                        | 525                 | 20 (3.8)                  | 18 (3.4)                    | 2 (0.4)                       | <0.0001 | 0.0004                          | 0.0221           |                        |
| WANG SMARCE1 TARGETS UP                        | 265                 | 14 (5.3)                  | 12 (4.5)                    | 2 (0.8)                       | <0.0001 | 0.0004                          | 0.0215           | neu, mnc, dnc          |
| ENK UV RESPONSE KERATINOCYTE UP                | 529                 | 19 (3.6)                  | 17 (3.2)                    | 2 (0.4)                       | <0.0001 | 0.0004                          | 0.0209           | neu                    |
| HOSHIDA LIVER CANCER SUBCLASS S3               | 259                 | 13 (5)                    | 13 (5)                      | 0 (0)                         | <0.0001 | 0.0004                          | 0.0201           | mnc                    |
| IWANAGA CARCINOGENESIS BY KRAS PTEN UP         | 167                 | 11 (6.6)                  | 10 (6)                      | 1 (0.6)                       | <0.0001 | 0.0004                          | 0.0197           |                        |
| WU CELL MIGRATION                              | 174                 | 11 (6.3)                  | 11 (6.3)                    | 0 (0)                         | <0.0001 | 0.0004                          | 0.0195           |                        |
| YAGI AML SURVIVAL                              | 124                 | 10 (8.1)                  | 10 (8.1)                    | 0 (0)                         | <0.0001 | 0.0004                          | 0.0194           |                        |
| LIEN BREAST CARCINOMA METAPLASTIC VS DUCTAL UP | 78                  | 8 (10.3)                  | 8 (10.3)                    | 0 (0)                         | <0.0001 | 0.0004                          | 0.0170           | mnc                    |
| CHEN LVAD SUPPORT OF FAILING HEART DN          | 42                  | 6 (14.3)                  | 6 (14.3)                    | 0 (0)                         | <0.0001 | 0.0004                          | 0.0137           |                        |
| TRACEY RESISTANCE TO IFNA2 DN                  | 30                  | 5 (16.7)                  | 5 (16.7)                    | 0 (0)                         | <0.0001 | 0.0004                          | 0.0117           |                        |
| IIZUKA LIVER CANCER PROGRESSION G1 G2 UP       | 12                  | 4 (33.3)                  | 4 (33.3)                    | 0 (0)                         | <0.0001 | 0.0004                          | 0.0098           | neu, mnc, tcl,<br>bcl  |

Appendix "PBMC response to ASO3-H5N1 vaccine"

Howard, Goll et al.

| Category Name                                              | Category<br>Genes # | Any-reg. DE<br>Genes #(%) | Up-reg.<br>DE Genes<br>#(%) | Down-reg.<br>DE Genes<br>#(%) | P-Value | FDR<br>Ad-<br>justed<br>P-Value | Jaccard<br>Index | Cell Type Over-<br>lap     |
|------------------------------------------------------------|---------------------|---------------------------|-----------------------------|-------------------------------|---------|---------------------------------|------------------|----------------------------|
| BENPORATH SUZ12 TARGETS                                    | 953                 | 31 (3.3)                  | 29 (3)                      | 2 (0.2)                       | <0.0001 | 0.0005                          | 0.0234           |                            |
| MOOTHA PGC                                                 | 407                 | 17 (4.2)                  | 16 (3.9)                    | 1 (0.2)                       | <0.0001 | 0.0005                          | 0.0215           |                            |
| ROZANOV MMP14 TARGETS UP                                   | 270                 | 14 (5.2)                  | 12 (4.4)                    | 2 (0.7)                       | <0.0001 | 0.0005                          | 0.0213           | neu, mnc, dnc              |
| CASORELLI ACUTE PROMYELOCYTIC LEUKEMIA UP                  | 162                 | 11 (6.8)                  | 9 (5.6)                     | 2 (1.2)                       | <0.0001 | 0.0005                          | 0.0199           |                            |
| CADWELL ATG16L1 TARGETS UP                                 | 94                  | 8 (8.5)                   | 8 (8.5)                     | 0 (0)                         | <0.0001 | 0.0005                          | 0.0164           | mnc                        |
| KUROZUMI RESPONSE TO ONCOCYTIC VIRUS                       | 40                  | 6 (15)                    | 6 (15)                      | 0 (0)                         | <0.0001 | 0.0005                          | 0.0138           |                            |
| ABE VEGFA TARGETS 30MIN                                    | 28                  | 5 (17.9)                  | 5 (17.9)                    | 0 (0)                         | <0.0001 | 0.0005                          | 0.0118           |                            |
| WATANABE ULCERATIVE COLITIS WITH CANCER DN                 | 13                  | 4 (30.8)                  | 4 (30.8)                    | 0 (0)                         | <0.0001 | 0.0005                          | 0.0098           | neu, mnc, dnc,<br>tcl, bcl |
| MASSARWEH TAMOXIFEN RESISTANCE DN                          | 235                 | 13 (5.5)                  | 10 (4.3)                    | 3 (1.3)                       | <0.0001 | 0.0006                          | 0.0209           |                            |
| KAN RESPONSE TO ARSENIC TRIOXIDE                           | 114                 | 9 (7.9)                   | 9 (7.9)                     | 0 (0)                         | <0.0001 | 0.0006                          | 0.0178           | mnc                        |
| BASSO HAIRY CELL LEUKEMIA DN                               | 79                  | 8 (10.1)                  | 7 (8.9)                     | 1 (1.3)                       | <0.0001 | 0.0006                          | 0.0169           | dnc                        |
| LABBE TGFB1 TARGETS DN                                     | 100                 | 8 (8)                     | 8 (8)                       | 0 (0)                         | <0.0001 | 0.0006                          | 0.0162           |                            |
| NATSUME RESPONSE TO INTERFERON BETA UP                     | 71                  | 7 (9.9)                   | 7 (9.9)                     | 0 (0)                         | <0.0001 | 0.0006                          | 0.0151           | mnc, tcl                   |
| SESTO RESPONSE TO UV C1                                    | 71                  | 7 (9.9)                   | 7 (9.9)                     | 0 (0)                         | <0.0001 | 0.0006                          | 0.0151           |                            |
| BILBAN B CLL LPL DN                                        | 45                  | 6 (13.3)                  | 6 (13.3)                    | 0 (0)                         | <0.0001 | 0.0006                          | 0.0136           |                            |
| SAGIV CD24 TARGETS DN                                      | 46                  | 6 (13)                    | 6 (13)                      | 0 (0)                         | <0.0001 | 0.0006                          | 0.0136           | neu                        |
| CROONQUIST STROMAL STIMULATION UP                          | 55                  | 6 (10.9)                  | 6 (10.9)                    | 0 (0)                         | <0.0001 | 0.0006                          | 0.0133           |                            |
| SESTO RESPONSE TO UV C3                                    | 20                  | 4 (20)                    | 4 (20)                      | 0 (0)                         | <0.0001 | 0.0006                          | 0.0096           |                            |
| BOCHKIS FOXA2 TARGETS                                      | 425                 | 18 (4.2)                  | 17 (4)                      | 1 (0.2)                       | <0.0001 | 0.0007                          | 0.0223           | neu                        |
| MONNIER POSTRADIATION TUMOR ESCAPE DN                      | 357                 | 16 (4.5)                  | 15 (4.2)                    | 1 (0.3)                       | <0.0001 | 0.0007                          | 0.0216           | neu, mnc, dnc,<br>tcl, bcl |
| ZHANG TLX TARGETS 60HR UP                                  | 289                 | 14 (4.8)                  | 11 (3.8)                    | 3 (1)                         | <0.0001 | 0.0007                          | 0.0207           |                            |
| PEREZ TP63 TARGETS                                         | 343                 | 16 (4.7)                  | 16 (4.7)                    | 0 (0)                         | <0.0001 | 0.0008                          | 0.0220           | mnc                        |
| SANSOM APC TARGETS DN                                      | 359                 | 16 (4.5)                  | 16 (4.5)                    | 0 (0)                         | <0.0001 | 0.0008                          | 0.0215           | neu, mnc, dnc              |
| YAO TEMPORAL RESPONSE TO PROGESTERONE CLUSTER 9            | 72                  | 7 (9.7)                   | 7 (9.7)                     | 0 (0)                         | <0.0001 | 0.0008                          | 0.0150           | neu                        |
| MEISSNER NPC HCP WITH H3 UNMETHYLATED                      | 523                 | 20 (3.8)                  | 19 (3.6)                    | 1 (0.2)                       | <0.0001 | 0.0009                          | 0.0221           |                            |
| OKUMURA INFLAMMATORY RESPONSE LPS                          | 174                 | 11 (6.3)                  | 11 (6.3)                    | 0 (0)                         | <0.0001 | 0.0009                          | 0.0195           |                            |
| HSIAO LIVER SPECIFIC GENES                                 | 234                 | 12 (5.1)                  | 12 (5.1)                    | 0 (0)                         | <0.0001 | 0.0009                          | 0.0193           | mnc                        |
| DURAND STROMA MAX DN                                       | 152                 | 10 (6.6)                  | 10 (6.6)                    | 0 (0)                         | <0.0001 | 0.0009                          | 0.0184           |                            |
| CHUNG BLISTER CYTOTOXICITY UP                              | 130                 | 9 (6.9)                   | 9 (6.9)                     | 0 (0)                         | <0.0001 | 0.0009                          | 0.0172           | neu                        |
| TURASHVILI BREAST LOBULAR CARCINOMA VS DUCTAL NORMAL<br>UP | 65                  | 7 (10.8)                  | 6 (9.2)                     | 1 (1.5)                       | <0.0001 | 0.0009                          | 0.0153           |                            |
| ROY WOUND BLOOD VESSEL UP                                  | 46                  | 6 (13)                    | 5 (10.9)                    | 1 (2.2)                       | <0.0001 | 0.0009                          | 0.0136           |                            |
| MAHADEVAN RESPONSE TO MP470 DN                             | 20                  | 4 (20)                    | 4 (20)                      | 0 (0)                         | <0.0001 | 0.0009                          | 0.0096           | neu                        |
| WU SILENCED BY METHYLATION IN BLADDER CANCER               | 53                  | 6 (11.3)                  | 6 (11.3)                    | 0 (0)                         | <0.0001 | 0.0009                          | 0.0134           |                            |
| STEARMAN TUMOR FIELD EFFECT UP                             | 35                  | 5 (14.3)                  | 5 (14.3)                    | 0 (0)                         | <0.0001 | 0.0009                          | 0.0116           |                            |

| Category Name                                          | Category Genes # | Any-reg. DE Genes #(%) | Up-reg. DE Genes #(%) | Down-reg. DE Genes #(%) | P-Value | FDR Ad-justed P-Value | Jaccard Index | Cell Type Overlap       |
|--------------------------------------------------------|------------------|------------------------|-----------------------|-------------------------|---------|-----------------------|---------------|-------------------------|
| RUAN RESPONSE TO TNF TROGLITAZONE UP                   | 17               | 4 (23.5)               | 4 (23.5)              | 0 (0)                   | <0.0001 | 0.0009                | 0.0097        | mnc, dnc, tcl, nkc, bcl |
| SHIN B CELL LYMPHOMA CLUSTER 6                         | 10               | 3 (30)                 | 3 (30)                | 0 (0)                   | <0.0001 | 0.0009                | 0.0074        |                         |
| LEE LIVER CANCER SURVIVAL UP                           | 167              | 10 (6)                 | 10 (6)                | 0 (0)                   | 0.0001  | 0.001                 | 0.0179        | mnc                     |
| LABBE TARGETS OF TGFB1 AND WNT3A DN                    | 106              | 8 (7.5)                | 8 (7.5)               | 0 (0)                   | 0.0001  | 0.001                 | 0.0160        | mnc, dnc                |
| FRIDMAN SENESCENCE UP                                  | 78               | 7 (9)                  | 7 (9)                 | 0 (0)                   | 0.0001  | 0.001                 | 0.0148        | dnc                     |
| ROZANOV MMP14 TARGETS DN                               | 32               | 5 (15.6)               | 5 (15.6)              | 0 (0)                   | 0.0001  | 0.001                 | 0.0117        |                         |
| CROONQUIST NRAS SIGNALING UP                           | 35               | 5 (14.3)               | 5 (14.3)              | 0 (0)                   | 0.0001  | 0.001                 | 0.0116        | neu                     |
| BLALOCK ALZHEIMERS DISEASE UP                          | 1628             | 44 (2.7)               | 44 (2.7)              | 0 (0)                   | 0.0001  | 0.0011                | 0.0222        | neu, mnc, dnc           |
| VANHARANTA UTERINE FIBROID DN                          | 66               | 7 (10.6)               | 7 (10.6)              | 0 (0)                   | 0.0001  | 0.0012                | 0.0152        | neu, mnc                |
| SARTIPY BLUNTED BY INSULIN RESISTANCE UP               | 19               | 4 (21.1)               | 4 (21.1)              | 0 (0)                   | 0.0001  | 0.0012                | 0.0096        | mnc, dnc, tcl           |
| GUTIERREZ WALDENSTROEMS MACROGLOBULINEMIA 1 DN         | 9                | 3 (33.3)               | 3 (33.3)              | 0 (0)                   | 0.0001  | 0.0012                | 0.0074        |                         |
| LEE LIVER CANCER MYC TGFA UP                           | 62               | 6 (9.7)                | 5 (8.1)               | 1 (1.6)                 | 0.0001  | 0.0013                | 0.0131        | dnc                     |
| FARMER BREAST CANCER CLUSTER 4                         | 16               | 4 (25)                 | 4 (25)                | 0 (0)                   | 0.0001  | 0.0013                | 0.0097        |                         |
| NIELSEN GIST VS SYNOVIAL SARCOMA DN                    | 20               | 4 (20)                 | 4 (20)                | 0 (0)                   | 0.0001  | 0.0013                | 0.0096        |                         |
| MARTENS BOUND BY PML RARA FUSION                       | 446              | 18 (4)                 | 18 (4)                | 0 (0)                   | 0.0001  | 0.0013                | 0.0217        | neu, mnc, tcl           |
| WINTER HYPOXIA METAGENE                                | 226              | 12 (5.3)               | 9 (4)                 | 3 (1.3)                 | 0.0001  | 0.0013                | 0.0195        | neu                     |
| TONKS TARGETS OF RUNX1 RUNX1T1 FUSION HSC DN           | 179              | 10 (5.6)               | 10 (5.6)              | 0 (0)                   | 0.0001  | 0.0013                | 0.0175        |                         |
| RASHI RESPONSE TO IONIZING RADIATION 6                 | 79               | 7 (8.9)                | 7 (8.9)               | 0 (0)                   | 0.0001  | 0.0013                | 0.0148        | dnc                     |
| SCHLINGEMANN SKIN CARCINOGENESIS TPA UP                | 42               | 5 (11.9)               | 5 (11.9)              | 0 (0)                   | 0.0001  | 0.0013                | 0.0114        |                         |
| EBAUER TARGETS OF PAX3 FOXO1 FUSION UP                 | 199              | 11 (5.5)               | 10 (5)                | 1 (0.5)                 | 0.0002  | 0.0014                | 0.0187        |                         |
| LINDGREN BLADDER CANCER CLUSTER 2A DN                  | 131              | 9 (6.9)                | 9 (6.9)               | 0 (0)                   | 0.0002  | 0.0014                | 0.0172        |                         |
| SPIRA SMOKERS LUNG CANCER UP                           | 35               | 5 (14.3)               | 5 (14.3)              | 0 (0)                   | 0.0002  | 0.0014                | 0.0116        |                         |
| ELVIDGE HYPOXIA UP                                     | 166              | 10 (6)                 | 9 (5.4)               | 1 (0.6)                 | 0.0002  | 0.0015                | 0.0180        | neu, mnc, dnc           |
| BROWNE HCMV INFECTION 12HR UP                          | 105              | 8 (7.6)                | 8 (7.6)               | 0 (0)                   | 0.0002  | 0.0015                | 0.0161        | neu, mnc, dnc           |
| GESERICK TERT TARGETS DN                               | 21               | 4 (19)                 | 4 (19)                | 0 (0)                   | 0.0002  | 0.0015                | 0.0096        | neu                     |
| MATTIOLI MULTIPLE MYELOMA WITH 14Q32 TRANSLOCATIONS    | 33               | 5 (15.2)               | 5 (15.2)              | 0 (0)                   | 0.0002  | 0.0016                | 0.0117        | neu                     |
| GARGALOVIC RESPONSE TO OXIDIZED PHOSPHOLIPIDS BLACK UP | 35               | 5 (14.3)               | 5 (14.3)              | 0 (0)                   | 0.0002  | 0.0016                | 0.0116        |                         |
| BROWNE HCMV INFECTION 2HR UP                           | 38               | 5 (13.2)               | 5 (13.2)              | 0 (0)                   | 0.0002  | 0.0016                | 0.0115        | neu                     |
| BRUINS UVC RESPONSE LATE                               | 1111             | 32 (2.9)               | 30 (2.7)              | 2 (0.2)                 | 0.0002  | 0.0016                | 0.0216        | neu, mnc                |
| HELLER HDAC TARGETS SILENCED BY METHYLATION DN         | 269              | 13 (4.8)               | 13 (4.8)              | 0 (0)                   | 0.0002  | 0.0016                | 0.0198        | neu, tcl                |
| GAVIN FOXP3 TARGETS CLUSTER P2                         | 77               | 7 (9.1)                | 7 (9.1)               | 0 (0)                   | 0.0002  | 0.0016                | 0.0149        | mnc                     |
| SMITH TERT TARGETS DN                                  | 83               | 7 (8.4)                | 7 (8.4)               | 0 (0)                   | 0.0002  | 0.0016                | 0.0147        |                         |
| NAGASHIMA NRG1 SIGNALING UP                            | 175              | 10 (5.7)               | 10 (5.7)              | 0 (0)                   | 0.0002  | 0.0018                | 0.0177        |                         |
| SAKAI CHRONIC HEPATITIS VS LIVER CANCER UP             | 82               | 7 (8.5)                | 7 (8.5)               | 0 (0)                   | 0.0002  | 0.0018                | 0.0147        |                         |
| WEINMANN ADAPTATION TO HYPOXIA DN                      | 41               | 5 (12.2)               | 3 (7.3)               | 2 (4.9)                 | 0.0002  | 0.0018                | 0.0114        |                         |

Appendix "PBMC response to AS03-H5N1 vaccine"

Howard, Goll et al.

| Category Name                               | Category Genes # | Any-reg. DE Genes #(%) | Up-reg. DE Genes #(%) | Down-reg. DE Genes #(%) | P-Value | FDR Adjusted P-Value | Jaccard Index | Cell Type Overlap |
|---------------------------------------------|------------------|------------------------|-----------------------|-------------------------|---------|----------------------|---------------|-------------------|
| JIANG HYPOXIA NORMAL                        | 300              | 14 (4.7)               | 13 (4.3)              | 1 (0.3)                 | 0.0002  | 0.0019               | 0.0204        | dnc               |
| SMIRNOV RESPONSE TO IR 6HR DN               | 113              | 8 (7.1)                | 8 (7.1)               | 0 (0)                   | 0.0002  | 0.0019               | 0.0158        | neu, dnc          |
| WANG HCP PROSTATE CANCER                    | 112              | 8 (7.1)                | 7 (6.2)               | 1 (0.9)                 | 0.0002  | 0.0019               | 0.0158        | neu               |
| SAFFORD T LYMPHOCYTE ANERGY                 | 85               | 7 (8.2)                | 7 (8.2)               | 0 (0)                   | 0.0002  | 0.0019               | 0.0146        |                   |
| SMID BREAST CANCER RELAPSE IN BONE DN       | 279              | 13 (4.7)               | 12 (4.3)              | 1 (0.4)                 | 0.0002  | 0.002                | 0.0195        |                   |
| STEGER ADIPOGENESIS UP                      | 21               | 4 (19)                 | 4 (19)                | 0 (0)                   | 0.0002  | 0.002                | 0.0096        | mnc, dnc          |
| DELACROIX RAR BOUND ES                      | 449              | 17 (3.8)               | 16 (3.6)              | 1 (0.2)                 | 0.0002  | 0.0021               | 0.0204        |                   |
| SHETH LIVER CANCER VS TXNIP LOSS PAM4       | 250              | 12 (4.8)               | 11 (4.4)              | 1 (0.4)                 | 0.0002  | 0.0021               | 0.0188        |                   |
| WIERENGA STAT5A TARGETS DN                  | 219              | 11 (5)                 | 11 (5)                | 0 (0)                   | 0.0002  | 0.0021               | 0.0181        | neu, dnc          |
| CHIANG LIVER CANCER SUBCLASS INTERFERON UP  | 24               | 4 (16.7)               | 4 (16.7)              | 0 (0)                   | 0.0002  | 0.0021               | 0.0095        | neu, dnc          |
| DAZARD RESPONSE TO UV NHEK UP               | 243              | 11 (4.5)               | 10 (4.1)              | 1 (0.4)                 | 0.0003  | 0.0022               | 0.0174        | neu               |
| TAKEDA TARGETS OF NUP98 HOXA9 FUSION 6HR UP | 85               | 7 (8.2)                | 7 (8.2)               | 0 (0)                   | 0.0003  | 0.0022               | 0.0146        |                   |
| CHASSOT SKIN WOUND                          | 10               | 3 (30)                 | 3 (30)                | 0 (0)                   | 0.0003  | 0.0022               | 0.0074        |                   |
| VERHAAK GLIOBLASTOMA CLASSICAL              | 195              | 11 (5.6)               | 10 (5.1)              | 1 (0.5)                 | 0.0003  | 0.0022               | 0.0188        |                   |
| LU EZH2 TARGETS UP                          | 289              | 12 (4.2)               | 11 (3.8)              | 1 (0.3)                 | 0.0003  | 0.0022               | 0.0177        | neu, mnc, dnc     |
| MOHANKUMAR TLX1 TARGETS DN                  | 181              | 10 (5.5)               | 9 (5)                 | 1 (0.6)                 | 0.0003  | 0.0022               | 0.0175        |                   |
| AZARE NEOPLASTIC TRANSFORMATION BY STAT3 DN | 115              | 8 (7)                  | 7 (6.1)               | 1 (0.9)                 | 0.0003  | 0.0023               | 0.0157        | neu               |
| BACOLOD RESISTANCE TO ALKYLATING AGENTS UP  | 24               | 4 (16.7)               | 4 (16.7)              | 0 (0)                   | 0.0003  | 0.0023               | 0.0095        |                   |
| LOPEZ MBD TARGETS                           | 925              | 27 (2.9)               | 24 (2.6)              | 3 (0.3)                 | 0.0003  | 0.0024               | 0.0208        | neu               |
| FONTAINE FOLLICULAR THYROID ADENOMA DN      | 63               | 6 (9.5)                | 6 (9.5)               | 0 (0)                   | 0.0003  | 0.0024               | 0.0131        |                   |
| ALCALAY AML BY NPM1 LOCALIZATION UP         | 136              | 9 (6.6)                | 9 (6.6)               | 0 (0)                   | 0.0003  | 0.0025               | 0.0170        |                   |
| CHANG CORE SERUM RESPONSE DN                | 205              | 11 (5.4)               | 10 (4.9)              | 1 (0.5)                 | 0.0003  | 0.0026               | 0.0185        | neu, mnc, dnc     |
| RIZKI TUMOR INVASIVENESS 3D DN              | 262              | 12 (4.6)               | 12 (4.6)              | 0 (0)                   | 0.0003  | 0.0027               | 0.0184        |                   |
| DELPUECH FOXO3 TARGETS UP                   | 66               | 6 (9.1)                | 6 (9.1)               | 0 (0)                   | 0.0003  | 0.0027               | 0.0130        |                   |
| GAJATE RESPONSE TO TRABECTEDIN UP           | 68               | 6 (8.8)                | 6 (8.8)               | 0 (0)                   | 0.0003  | 0.0027               | 0.0130        | neu, mnc          |
| KAMIKUBO MYELOID CEBPA NETWORK              | 26               | 4 (15.4)               | 4 (15.4)              | 0 (0)                   | 0.0003  | 0.0027               | 0.0095        |                   |
| YAGI AML WITH 11Q23 REARRANGED              | 332              | 14 (4.2)               | 12 (3.6)              | 2 (0.6)                 | 0.0003  | 0.0027               | 0.0195        | mnc               |
| DACOSTA UV RESPONSE VIA ERCC3 UP            | 301              | 13 (4.3)               | 12 (4)                | 1 (0.3)                 | 0.0003  | 0.0027               | 0.0189        | neu, dnc          |
| FRASOR RESPONSE TO ESTRADIOL UP             | 38               | 5 (13.2)               | 5 (13.2)              | 0 (0)                   | 0.0003  | 0.0027               | 0.0115        |                   |
| CHIBA RESPONSE TO TSA                       | 48               | 5 (10.4)               | 5 (10.4)              | 0 (0)                   | 0.0004  | 0.003                | 0.0113        | mnc               |
| HELLER HDAC TARGETS UP                      | 318              | 13 (4.1)               | 13 (4.1)              | 0 (0)                   | 0.0004  | 0.003                | 0.0184        | neu               |
| LEIN ASTROCYTE MARKERS                      | 42               | 5 (11.9)               | 4 (9.5)               | 1 (2.4)                 | 0.0004  | 0.003                | 0.0114        |                   |
| ZHAN MULTIPLE MYELOMA MF UP                 | 44               | 5 (11.4)               | 5 (11.4)              | 0 (0)                   | 0.0004  | 0.0031               | 0.0114        | neu               |
| DOANE BREAST CANCER ESR1 DN                 | 45               | 5 (11.1)               | 5 (11.1)              | 0 (0)                   | 0.0004  | 0.0032               | 0.0113        |                   |
| OSADA ASCL1 TARGETS DN                      | 23               | 4 (17.4)               | 4 (17.4)              | 0 (0)                   | 0.0004  | 0.0032               | 0.0095        |                   |
| NEWMAN ERCC6 TARGETS UP                     | 26               | 4 (15.4)               | 4 (15.4)              | 0 (0)                   | 0.0004  | 0.0033               | 0.0095        | neu               |

Appendix "PBMC response to AS03-H5N1 vaccine"

Howard, Goll et al.

| Category Name                                         | Category<br>Genes # | Any-reg. DE<br>Genes #(%) | Up-reg.<br>DE Genes<br>#(%) | Down-reg.<br>DE Genes<br>#(%) | P-Value | FDR    | Jaccard<br>Index | Cell Type Over-<br>lap     |
|-------------------------------------------------------|---------------------|---------------------------|-----------------------------|-------------------------------|---------|--------|------------------|----------------------------|
| WORSCHER TUMOR EVASION AND TOLEROGENICITY UP          | 29                  | 4 (13.8)                  | 3 (10.3)                    | 1 (3.4)                       | 0.0004  | 0.0033 | 0.0094           |                            |
| GRAHAM CML QUIESCENT VS NORMAL QUIESCENT DN           | 45                  | 5 (11.1)                  | 5 (11.1)                    | 0 (0)                         | 0.0004  | 0.0034 | 0.0113           |                            |
| DELYS THYROID CANCER DN                               | 219                 | 11 (5)                    | 10 (4.6)                    | 1 (0.5)                       | 0.0004  | 0.0035 | 0.0181           |                            |
| JECHLINGER EPITHELIAL TO MESENCHYMAL TRANSITION DN    | 65                  | 6 (9.2)                   | 6 (9.2)                     | 0 (0)                         | 0.0004  | 0.0035 | 0.0130           |                            |
| PROVENZANI METASTASIS DN                              | 133                 | 8 (6)                     | 8 (6)                       | 0 (0)                         | 0.0005  | 0.0036 | 0.0152           | mnc, dnc                   |
| DARWICHE SKIN TUMOR PROMOTER UP                       | 139                 | 8 (5.8)                   | 8 (5.8)                     | 0 (0)                         | 0.0005  | 0.0036 | 0.0150           | neu                        |
| FONTAINE THYROID TUMOR UNCERTAIN MALIGNANCY DN        | 25                  | 4 (16)                    | 4 (16)                      | 0 (0)                         | 0.0005  | 0.0036 | 0.0095           |                            |
| GENTILE UV LOW DOSE UP                                | 27                  | 4 (14.8)                  | 4 (14.8)                    | 0 (0)                         | 0.0005  | 0.0036 | 0.0094           | neu                        |
| MIKKELSEN IPS LCP WITH H3K4ME3                        | 170                 | 9 (5.3)                   | 9 (5.3)                     | 0 (0)                         | 0.0005  | 0.0039 | 0.0160           | mnc, dnc                   |
| GILDEA METASTASIS                                     | 30                  | 4 (13.3)                  | 4 (13.3)                    | 0 (0)                         | 0.0005  | 0.0039 | 0.0094           | mnc                        |
| MIYAGAWA TARGETS OF EWSR1 ETS FUSIONS DN              | 219                 | 11 (5)                    | 10 (4.6)                    | 1 (0.5)                       | 0.0005  | 0.0039 | 0.0181           | dnc                        |
| CHANDRAN METASTASIS DN                                | 301                 | 13 (4.3)                  | 13 (4.3)                    | 0 (0)                         | 0.0005  | 0.0041 | 0.0189           |                            |
| KOKKINAKIS METHIONINE DEPRIVATION 96HR DN             | 73                  | 6 (8.2)                   | 5 (6.8)                     | 1 (1.4)                       | 0.0005  | 0.0041 | 0.0128           |                            |
| KRIGE AMINO ACID DEPRIVATION                          | 29                  | 4 (13.8)                  | 4 (13.8)                    | 0 (0)                         | 0.0005  | 0.0041 | 0.0094           |                            |
| TARTE PLASMA CELL VS B LYMPHOCYTE UP                  | 73                  | 6 (8.2)                   | 6 (8.2)                     | 0 (0)                         | 0.0005  | 0.0042 | 0.0128           |                            |
| HATADA METHYLATED IN LUNG CANCER UP                   | 382                 | 15 (3.9)                  | 13 (3.4)                    | 2 (0.5)                       | 0.0006  | 0.0042 | 0.0195           |                            |
| RODRIGUES NTN1 TARGETS DN                             | 154                 | 9 (5.8)                   | 5 (3.2)                     | 4 (2.6)                       | 0.0006  | 0.0042 | 0.0165           |                            |
| WIERENGA STAT5A TARGETS GROUP1                        | 130                 | 8 (6.2)                   | 8 (6.2)                     | 0 (0)                         | 0.0006  | 0.0042 | 0.0153           | neu, mnc, dnc              |
| ELVIDGE HYPOXIA BY DMOG UP                            | 126                 | 8 (6.3)                   | 7 (5.6)                     | 1 (0.8)                       | 0.0006  | 0.0044 | 0.0154           | neu, mnc, dnc              |
| RUIZ TNC TARGETS UP                                   | 149                 | 9 (6)                     | 9 (6)                       | 0 (0)                         | 0.0006  | 0.0044 | 0.0166           | mnc, dnc                   |
| MARTINEZ RB1 TARGETS UP                               | 654                 | 21 (3.2)                  | 21 (3.2)                    | 0 (0)                         | 0.0006  | 0.0045 | 0.0203           |                            |
| GARGALOVIC RESPONSE TO OXIDIZED PHOSPHOLIPIDS GREY DN | 73                  | 6 (8.2)                   | 6 (8.2)                     | 0 (0)                         | 0.0006  | 0.0045 | 0.0128           | neu, mnc, dnc,<br>tcl, nkc |
| BURTON ADIPOGENESIS PEAK AT 2HR                       | 50                  | 5 (10)                    | 5 (10)                      | 0 (0)                         | 0.0006  | 0.0045 | 0.0112           |                            |
| TAVOR CEBPA TARGETS DN                                | 30                  | 4 (13.3)                  | 4 (13.3)                    | 0 (0)                         | 0.0006  | 0.0045 | 0.0094           |                            |
| COATES MACROPHAGE M1 VS M2 DN                         | 74                  | 6 (8.1)                   | 5 (6.8)                     | 1 (1.4)                       | 0.0006  | 0.0045 | 0.0128           |                            |
| DARWICHE PAPILOMA RISK HIGH UP                        | 145                 | 8 (5.5)                   | 8 (5.5)                     | 0 (0)                         | 0.0006  | 0.0047 | 0.0149           | neu                        |
| ZHAN MULTIPLE MYELOMA HP UP                           | 50                  | 5 (10)                    | 5 (10)                      | 0 (0)                         | 0.0006  | 0.0047 | 0.0112           | mnc                        |
| DORN ADENOVIRUS INFECTION 12HR UP                     | 28                  | 4 (14.3)                  | 3 (10.7)                    | 1 (3.6)                       | 0.0006  | 0.0047 | 0.0094           |                            |
| CAVARD LIVER CANCER MALIGNANT VS BENIGN               | 32                  | 4 (12.5)                  | 4 (12.5)                    | 0 (0)                         | 0.0006  | 0.0047 | 0.0093           |                            |
| SMID BREAST CANCER ERBB2 UP                           | 132                 | 8 (6.1)                   | 7 (5.3)                     | 1 (0.8)                       | 0.0006  | 0.0047 | 0.0152           |                            |
| BAUS TFF2 TARGETS UP                                  | 32                  | 4 (12.5)                  | 4 (12.5)                    | 0 (0)                         | 0.0007  | 0.0049 | 0.0093           | neu, mnc, dnc              |
| ZHANG GATA6 TARGETS UP                                | 13                  | 3 (23.1)                  | 3 (23.1)                    | 0 (0)                         | 0.0007  | 0.0051 | 0.0073           |                            |
| HAN SATB1 TARGETS UP                                  | 380                 | 15 (3.9)                  | 15 (3.9)                    | 0 (0)                         | 0.0007  | 0.0051 | 0.0196           | mnc                        |
| PEDERSEN METASTASIS BY ERBB2 ISOFORM 7                | 401                 | 15 (3.7)                  | 15 (3.7)                    | 0 (0)                         | 0.0007  | 0.0051 | 0.0191           | mnc                        |
| PEDERSEN METASTASIS BY ERBB2 ISOFORM 1                | 47                  | 5 (10.6)                  | 5 (10.6)                    | 0 (0)                         | 0.0007  | 0.0052 | 0.0113           |                            |

| Category Name                                       | Category<br>Genes # | Any-reg. DE<br>Genes #(%) | Up-reg.<br>DE Genes<br>#(%) | Down-reg.<br>DE Genes<br>#(%) | P-Value | FDR<br>Ad-<br>justed<br>P-Value | Jaccard<br>Index | Cell Type Over-<br>lap |
|-----------------------------------------------------|---------------------|---------------------------|-----------------------------|-------------------------------|---------|---------------------------------|------------------|------------------------|
| VANASSE BCL2 TARGETS DN                             | 72                  | 6 (8.3)                   | 5 (6.9)                     | 1 (1.4)                       | 0.0007  | 0.0052                          | 0.0128           |                        |
| CREIGHTON ENDOCRINE THERAPY RESISTANCE 5            | 460                 | 17 (3.7)                  | 17 (3.7)                    | 0 (0)                         | 0.0007  | 0.0053                          | 0.0201           |                        |
| FARMER BREAST CANCER APOCRINE VS BASAL              | 314                 | 13 (4.1)                  | 13 (4.1)                    | 0 (0)                         | 0.0008  | 0.0055                          | 0.0185           |                        |
| ONDER CDH1 TARGETS 2 UP                             | 235                 | 11 (4.7)                  | 10 (4.3)                    | 1 (0.4)                       | 0.0008  | 0.0055                          | 0.0176           | mnc                    |
| BOYALT LIVER CANCER SUBCLASS G3 DN                  | 52                  | 5 (9.6)                   | 5 (9.6)                     | 0 (0)                         | 0.0008  | 0.0055                          | 0.0112           |                        |
| YAO TEMPORAL RESPONSE TO PROGESTERONE CLUSTER 5     | 29                  | 4 (13.8)                  | 4 (13.8)                    | 0 (0)                         | 0.0008  | 0.0055                          | 0.0094           | neu                    |
| KONDO EZH2 TARGETS                                  | 241                 | 11 (4.6)                  | 11 (4.6)                    | 0 (0)                         | 0.0008  | 0.0055                          | 0.0174           |                        |
| ADDYA ERYTHROID DIFFERENTIATION BY HEMIN            | 76                  | 6 (7.9)                   | 6 (7.9)                     | 0 (0)                         | 0.0008  | 0.0055                          | 0.0127           |                        |
| PETROVA ENDOTHELIUM LYMPHATIC VS BLOOD UP           | 143                 | 8 (5.6)                   | 7 (4.9)                     | 1 (0.7)                       | 0.0008  | 0.0056                          | 0.0149           |                        |
| URS ADIPOCYTE DIFFERENTIATION UP                    | 73                  | 6 (8.2)                   | 6 (8.2)                     | 0 (0)                         | 0.0008  | 0.0056                          | 0.0128           |                        |
| CHIARADONNA NEOPLASTIC TRANSFORMATION KRAS CDC25 DN | 48                  | 5 (10.4)                  | 5 (10.4)                    | 0 (0)                         | 0.0008  | 0.0056                          | 0.0113           |                        |
| BRUECKNER TARGETS OF MIRLET7A3 DN                   | 74                  | 6 (8.1)                   | 4 (5.4)                     | 2 (2.7)                       | 0.0008  | 0.0058                          | 0.0128           | mnc                    |
| HERNANDEZ ABERRANT MITOSIS BY DOCETACEL 2NM UP      | 76                  | 6 (7.9)                   | 5 (6.6)                     | 1 (1.3)                       | 0.0008  | 0.0058                          | 0.0127           |                        |
| GUILLAUMOND KLF10 TARGETS DN                        | 28                  | 4 (14.3)                  | 4 (14.3)                    | 0 (0)                         | 0.0008  | 0.0059                          | 0.0094           |                        |
| MCBRYAN PUBERTAL TGFB1 TARGETS UP                   | 163                 | 9 (5.5)                   | 7 (4.3)                     | 2 (1.2)                       | 0.0008  | 0.006                           | 0.0162           |                        |
| ZHONG RESPONSE TO AZACITIDINE AND TSA UP            | 180                 | 9 (5)                     | 8 (4.4)                     | 1 (0.6)                       | 0.0009  | 0.0061                          | 0.0157           | neu, mnc               |
| PRAMOONJAGO SOX4 TARGETS UP                         | 51                  | 5 (9.8)                   | 4 (7.8)                     | 1 (2)                         | 0.0009  | 0.0061                          | 0.0112           |                        |
| PHONG TNF RESPONSE VIA P38 PARTIAL                  | 160                 | 9 (5.6)                   | 9 (5.6)                     | 0 (0)                         | 0.0009  | 0.0062                          | 0.0163           |                        |
| GROSS ELK3 TARGETS DN                               | 32                  | 4 (12.5)                  | 4 (12.5)                    | 0 (0)                         | 0.0009  | 0.0062                          | 0.0093           | mnc, tcl               |
| KIM RESPONSE TO TSA AND DECITABINE UP               | 120                 | 7 (5.8)                   | 7 (5.8)                     | 0 (0)                         | 0.0009  | 0.0062                          | 0.0136           | mnc, dnc               |
| HU GENOTOXIC DAMAGE 24HR                            | 35                  | 4 (11.4)                  | 4 (11.4)                    | 0 (0)                         | 0.0009  | 0.0062                          | 0.0093           | neu                    |
| TSAI RESPONSE TO RADIATION THERAPY                  | 32                  | 4 (12.5)                  | 4 (12.5)                    | 0 (0)                         | 0.0009  | 0.0063                          | 0.0093           | neu, mnc, dnc          |
| MORI IMMATURE B LYMPHOCYTE UP                       | 52                  | 5 (9.6)                   | 5 (9.6)                     | 0 (0)                         | 0.0009  | 0.0064                          | 0.0112           | neu                    |
| ZHAN V1 LATE DIFFERENTIATION GENES UP               | 32                  | 4 (12.5)                  | 4 (12.5)                    | 0 (0)                         | 0.0009  | 0.0064                          | 0.0093           |                        |
| GREGORY SYNTHETIC LETHAL WITH IMATINIB              | 144                 | 8 (5.6)                   | 8 (5.6)                     | 0 (0)                         | 0.0009  | 0.0065                          | 0.0149           | neu                    |
| DAZARD RESPONSE TO UV SCC UP                        | 111                 | 7 (6.3)                   | 7 (6.3)                     | 0 (0)                         | 0.0009  | 0.0065                          | 0.0139           |                        |
| LEE LIVER CANCER DENA UP                            | 56                  | 5 (8.9)                   | 4 (7.1)                     | 1 (1.8)                       | 0.0009  | 0.0065                          | 0.0111           |                        |
| WANG IMMORTALIZED BY HOXA9 AND MEIS1 UP             | 29                  | 4 (13.8)                  | 4 (13.8)                    | 0 (0)                         | 0.0009  | 0.0065                          | 0.0094           |                        |
| HOUSTIS ROS                                         | 35                  | 4 (11.4)                  | 4 (11.4)                    | 0 (0)                         | 0.0009  | 0.0065                          | 0.0093           |                        |
| DUTTA APOPTOSIS VIA NFKB                            | 32                  | 4 (12.5)                  | 4 (12.5)                    | 0 (0)                         | 0.001   | 0.0066                          | 0.0093           | mnc                    |
| KANG GIST WITH PDGFRA UP                            | 50                  | 5 (10)                    | 5 (10)                      | 0 (0)                         | 0.001   | 0.0066                          | 0.0112           | mnc, dnc               |
| FARMER BREAST CANCER BASAL VS LULMINAL              | 316                 | 13 (4.1)                  | 12 (3.8)                    | 1 (0.3)                       | 0.001   | 0.0068                          | 0.0185           |                        |
| CREIGHTON ENDOCRINE THERAPY RESISTANCE 4            | 286                 | 12 (4.2)                  | 10 (3.5)                    | 2 (0.7)                       | 0.001   | 0.0068                          | 0.0178           |                        |
| KIM WT1 TARGETS 8HR UP                              | 166                 | 9 (5.4)                   | 7 (4.2)                     | 2 (1.2)                       | 0.001   | 0.0068                          | 0.0161           |                        |
| LANDIS ERBB2 BREAST TUMORS 324 DN                   | 145                 | 8 (5.5)                   | 7 (4.8)                     | 1 (0.7)                       | 0.001   | 0.0068                          | 0.0149           |                        |
| FRASOR RESPONSE TO ESTRADIOL DN                     | 79                  | 6 (7.6)                   | 6 (7.6)                     | 0 (0)                         | 0.001   | 0.0069                          | 0.0127           | neu                    |

Appendix "PBMC response to AS03-H5N1 vaccine"

Howard, Goll et al.



| Category Name                                  | Category<br>Genes # | Any-reg. DE<br>Genes #(%) | Up-reg.<br>DE Genes<br>#(%) | Down-reg.<br>DE Genes<br>#(%) | P-Value | FDR<br>Ad-<br>justed<br>P-Value | Jaccard<br>Index | Cell Type Over-<br>lap |
|------------------------------------------------|---------------------|---------------------------|-----------------------------|-------------------------------|---------|---------------------------------|------------------|------------------------|
| LIU CDX2 TARGETS UP                            | 34                  | 4 (11.8)                  | 4 (11.8)                    | 0 (0)                         | 0.001   | 0.0069                          | 0.0093           |                        |
| BOYLAN MULTIPLE MYELOMA PCA3 UP                | 76                  | 6 (7.9)                   | 6 (7.9)                     | 0 (0)                         | 0.001   | 0.0069                          | 0.0127           | neu, mnc               |
| LEE TARGETS OF PTCH1 AND SUFU UP               | 55                  | 5 (9.1)                   | 5 (9.1)                     | 0 (0)                         | 0.001   | 0.0071                          | 0.0111           | dnc                    |
| HINATA NFKB TARGETS FIBROBLAST UP              | 83                  | 6 (7.2)                   | 6 (7.2)                     | 0 (0)                         | 0.0011  | 0.0072                          | 0.0126           | neu, mnc               |
| HADDAD T LYMPHOCYTE AND NK PROGENITOR DN       | 62                  | 5 (8.1)                   | 5 (8.1)                     | 0 (0)                         | 0.0011  | 0.0072                          | 0.0109           |                        |
| KUMAR PATHOGEN LOAD BY MACROPHAGES             | 261                 | 11 (4.2)                  | 11 (4.2)                    | 0 (0)                         | 0.0011  | 0.0072                          | 0.0169           |                        |
| CHIARADONNA NEOPLASTIC TRANSFORMATION CDC25 UP | 108                 | 7 (6.5)                   | 7 (6.5)                     | 0 (0)                         | 0.0011  | 0.0075                          | 0.0139           |                        |
| ZWANG EGF PERSISTENTLY UP                      | 30                  | 4 (13.3)                  | 4 (13.3)                    | 0 (0)                         | 0.0011  | 0.0075                          | 0.0094           |                        |
| CAIRO HEPATOBLASTOMA DN                        | 259                 | 11 (4.2)                  | 10 (3.9)                    | 1 (0.4)                       | 0.0011  | 0.0076                          | 0.0169           | mnc                    |
| SPIELMAN LYMPHOBLAST EUROPEAN VS ASIAN DN      | 570                 | 19 (3.3)                  | 19 (3.3)                    | 0 (0)                         | 0.0011  | 0.0076                          | 0.0200           | neu, mnc, dnc          |
| ODONNELL TARGETS OF MYC AND TFRC UP            | 78                  | 6 (7.7)                   | 4 (5.1)                     | 2 (2.6)                       | 0.0012  | 0.0077                          | 0.0127           | neu                    |
| ZHANG TLX TARGETS 36HR UP                      | 219                 | 10 (4.6)                  | 10 (4.6)                    | 0 (0)                         | 0.0012  | 0.0078                          | 0.0164           | neu                    |
| ACEVEDO METHYLATED IN LIVER CANCER DN          | 813                 | 23 (2.8)                  | 22 (2.7)                    | 1 (0.1)                       | 0.0012  | 0.0079                          | 0.0193           |                        |
| SCHOEN NFKB SIGNALING                          | 34                  | 4 (11.8)                  | 4 (11.8)                    | 0 (0)                         | 0.0012  | 0.0081                          | 0.0093           |                        |
| LEE NEURAL CREST STEM CELL DN                  | 107                 | 7 (6.5)                   | 5 (4.7)                     | 2 (1.9)                       | 0.0012  | 0.0082                          | 0.0140           |                        |
| MARIADASON REGULATED BY HISTONE ACETYLATION UP | 82                  | 6 (7.3)                   | 5 (6.1)                     | 1 (1.2)                       | 0.0012  | 0.0082                          | 0.0126           |                        |
| MUELLER COMMON TARGETS OF AML FUSIONS DN       | 42                  | 4 (9.5)                   | 4 (9.5)                     | 0 (0)                         | 0.0012  | 0.0082                          | 0.0091           | neu, mnc               |
| IVANOVA HEMATOPOIESIS MATURE CELL              | 281                 | 12 (4.3)                  | 12 (4.3)                    | 0 (0)                         | 0.0013  | 0.0084                          | 0.0179           |                        |
| YAGI AML RELAPSE PROGNOSIS                     | 34                  | 4 (11.8)                  | 4 (11.8)                    | 0 (0)                         | 0.0013  | 0.0086                          | 0.0093           |                        |
| BOQUEST STEM CELL UP                           | 247                 | 11 (4.5)                  | 10 (4)                      | 1 (0.4)                       | 0.0013  | 0.0087                          | 0.0173           |                        |
| SCHAVOLT TARGETS OF TP53 AND TP63              | 16                  | 3 (18.8)                  | 3 (18.8)                    | 0 (0)                         | 0.0013  | 0.0087                          | 0.0072           |                        |
| XU RESPONSE TO TRETINOIN AND NSC682994 UP      | 16                  | 3 (18.8)                  | 3 (18.8)                    | 0 (0)                         | 0.0013  | 0.0087                          | 0.0072           | mnc, dnc               |
| PLASARI TGFB1 SIGNALING VIA NFIC 10HR UP       | 54                  | 5 (9.3)                   | 5 (9.3)                     | 0 (0)                         | 0.0014  | 0.0088                          | 0.0111           | neu, mnc, tcl          |
| WIERENGA STAT5A TARGETS GROUP2                 | 59                  | 5 (8.5)                   | 5 (8.5)                     | 0 (0)                         | 0.0014  | 0.0088                          | 0.0110           | neu                    |
| DAVICIONI TARGETS OF PAX FOXO1 FUSIONS UP      | 245                 | 11 (4.5)                  | 8 (3.3)                     | 3 (1.2)                       | 0.0014  | 0.009                           | 0.0173           |                        |
| GAURNIER PSMD4 TARGETS                         | 68                  | 5 (7.4)                   | 5 (7.4)                     | 0 (0)                         | 0.0014  | 0.0091                          | 0.0108           | neu, dnc               |
| STEARMAN LUNG CANCER EARLY VS LATE DN          | 59                  | 5 (8.5)                   | 5 (8.5)                     | 0 (0)                         | 0.0014  | 0.0092                          | 0.0110           |                        |
| KRIGE RESPONSE TO TOSEDOSTAT 24HR DN           | 993                 | 26 (2.6)                  | 25 (2.5)                    | 1 (0.1)                       | 0.0014  | 0.0092                          | 0.0190           | neu                    |
| MARTINEZ RESPONSE TO TRABECTEDIN UP            | 66                  | 5 (7.6)                   | 5 (7.6)                     | 0 (0)                         | 0.0014  | 0.0092                          | 0.0108           | neu                    |
| SMID BREAST CANCER RELAPSE IN LIVER UP         | 6                   | 2 (33.3)                  | 2 (33.3)                    | 0 (0)                         | 0.0014  | 0.0092                          | 0.0049           |                        |
| KOINUMA COLON CANCER MSI DN                    | 16                  | 3 (18.8)                  | 2 (12.5)                    | 1 (6.2)                       | 0.0015  | 0.0094                          | 0.0072           | mnc                    |
| SWEET KRAS ONCOGENIC SIGNATURE                 | 88                  | 6 (6.8)                   | 6 (6.8)                     | 0 (0)                         | 0.0015  | 0.0095                          | 0.0124           |                        |
| MATSUDA NATURAL KILLER DIFFERENTIATION         | 463                 | 16 (3.5)                  | 16 (3.5)                    | 0 (0)                         | 0.0015  | 0.0096                          | 0.0189           |                        |
| KYNG DNA DAMAGE UP                             | 214                 | 10 (4.7)                  | 8 (3.7)                     | 2 (0.9)                       | 0.0015  | 0.0096                          | 0.0165           |                        |
| MARCHINI TRABECTEDIN RESISTANCE UP             | 18                  | 3 (16.7)                  | 3 (16.7)                    | 0 (0)                         | 0.0015  | 0.0098                          | 0.0072           |                        |
| CERVERA SDHB TARGETS 1 UP                      | 114                 | 7 (6.1)                   | 7 (6.1)                     | 0 (0)                         | 0.0016  | 0.0099                          | 0.0138           |                        |

| Category Name                          | Category<br>Genes # | Any-reg. DE<br>Genes #(%) | Up-reg.<br>DE Genes<br>#(%) | Down-reg.<br>DE Genes<br>#(%) | P-Value | FDR<br>Ad-<br>justed<br>P-Value | Jaccard<br>Index | Cell Type Over-<br>lap |
|----------------------------------------|---------------------|---------------------------|-----------------------------|-------------------------------|---------|---------------------------------|------------------|------------------------|
| WIEDERSCHAIN TARGETS OF BMI1 AND PCGF2 | 56                  | 5 (8.9)                   | 4 (7.1)                     | 1 (1.8)                       | 0.0016  | 0.0099                          | 0.0111           |                        |

**Table A18:** Significantly enriched MSigDB Chemical/Genetic Perturbation Sets (RNA-Seq, PBMC, Day 1). Results sorted by FDR and Jaccard index. The last column indicates overlap with cell type-specific results: dnc: dendritic cells, mnc: monocytes, neu: neutrophils, tcl: T-cells, nkc: NK-cells, bcl: B-cells.

| Category Name                                  | Category<br>Genes # | Any-reg. DE<br>Genes #(%) | Up-reg.<br>DE Genes<br>#(%) | Down-reg.<br>DE Genes<br>#(%) | P-Value | FDR<br>Ad-<br>justed<br>P-Value | Jaccard<br>Index | Cell Type Over-<br>lap          |
|------------------------------------------------|---------------------|---------------------------|-----------------------------|-------------------------------|---------|---------------------------------|------------------|---------------------------------|
| GSE13485 CTRL VS DAY7 YF17D VACCINE PBMC DN    | 195                 | 87 (44.6)                 | 87 (44.6)                   | 0 (0)                         | <0.0001 | <0.0001                         | 0.1740           | neu, mnc, dnc,<br>tcl, nkc, bcl |
| GSE13485 CTRL VS DAY3 YF17D VACCINE PBMC DN    | 193                 | 71 (36.8)                 | 71 (36.8)                   | 0 (0)                         | <0.0001 | <0.0001                         | 0.1381           | neu, mnc, dnc,<br>tcl, nkc, bcl |
| GSE13485 DAY1 VS DAY7 YF17D VACCINE PBMC DN    | 193                 | 71 (36.8)                 | 71 (36.8)                   | 0 (0)                         | <0.0001 | <0.0001                         | 0.1381           | neu, mnc, dnc,<br>tcl, nkc, bcl |
| GSE1432 CTRL VS IFNG 24H MICROGLIA DN          | 200                 | 65 (32.5)                 | 65 (32.5)                   | 0 (0)                         | <0.0001 | <0.0001                         | 0.1233           | neu, mnc, dnc,<br>tcl, nkc, bcl |
| GSE13485 PRE VS POST YF17D VACCINATION PBMC DN | 192                 | 64 (33.3)                 | 64 (33.3)                   | 0 (0)                         | <0.0001 | <0.0001                         | 0.1231           | neu, mnc, dnc,<br>tcl, nkc, bcl |
| GSE10325 LUPUS CD4 TCELL VS LUPUS MYELOID DN   | 191                 | 61 (31.9)                 | 61 (31.9)                   | 0 (0)                         | <0.0001 | <0.0001                         | 0.1169           | neu, mnc, dnc                   |
| GSE13485 DAY3 VS DAY7 YF17D VACCINE PBMC DN    | 205                 | 60 (29.3)                 | 60 (29.3)                   | 0 (0)                         | <0.0001 | <0.0001                         | 0.1117           | neu, mnc, dnc,<br>tcl, nkc, bcl |
| GSE13484 UNSTIM VS YF17D VACCINE STIM PBMC DN  | 198                 | 59 (29.8)                 | 59 (29.8)                   | 0 (0)                         | <0.0001 | <0.0001                         | 0.1111           | neu, mnc, dnc,<br>tcl, nkc, bcl |
| GSE1432 CTRL VS IFNG 6H MICROGLIA DN           | 198                 | 59 (29.8)                 | 59 (29.8)                   | 0 (0)                         | <0.0001 | <0.0001                         | 0.1111           | neu, mnc, dnc,<br>tcl, nkc, bcl |
| GSE14000 UNSTIM VS 4H LPS DC DN                | 199                 | 59 (29.6)                 | 59 (29.6)                   | 0 (0)                         | <0.0001 | <0.0001                         | 0.1109           | neu, mnc, dnc,<br>tcl, nkc, bcl |
| GSE29618 MONOCYTE VS MDC UP                    | 196                 | 58 (29.6)                 | 58 (29.6)                   | 0 (0)                         | <0.0001 | <0.0001                         | 0.1094           | mnc                             |
| GSE14000 UNSTIM VS 4H LPS DC TRANSLATED RNA DN | 194                 | 56 (28.9)                 | 56 (28.9)                   | 0 (0)                         | <0.0001 | <0.0001                         | 0.1057           | neu, mnc, dnc,<br>tcl, nkc, bcl |
| GSE22886 NAIVE CD8 TCELL VS MONOCYTE DN        | 196                 | 56 (28.6)                 | 56 (28.6)                   | 0 (0)                         | <0.0001 | <0.0001                         | 0.1053           |                                 |
| GSE18791 CTRL VS NEWCASTLE VIRUS DC 8H DN      | 189                 | 55 (29.1)                 | 55 (29.1)                   | 0 (0)                         | <0.0001 | <0.0001                         | 0.1046           | neu, mnc, dnc,<br>tcl, nkc, bcl |
| GSE22886 NAIVE CD4 TCELL VS MONOCYTE DN        | 197                 | 55 (27.9)                 | 55 (27.9)                   | 0 (0)                         | <0.0001 | <0.0001                         | 0.1030           | neu                             |
| GSE29618 MONOCYTE VS PDC UP                    | 197                 | 55 (27.9)                 | 55 (27.9)                   | 0 (0)                         | <0.0001 | <0.0001                         | 0.1030           | mnc                             |

| Category Name                                        | Category<br>Genes # | Any-reg. DE<br>Genes #(%) | Up-reg.<br>DE Genes<br>#(%) | Down-reg.<br>DE Genes<br>#(%) | P-Value | FDR<br>Ad-<br>justed<br>P-Value | Jaccard<br>Index | Cell Type Over-<br>lap          |
|------------------------------------------------------|---------------------|---------------------------|-----------------------------|-------------------------------|---------|---------------------------------|------------------|---------------------------------|
| GSE11057 PBMC VS MEM CD4 TCELL UP                    | 191                 | 54 (28.3)                 | 54 (28.3)                   | 0 (0)                         | <0.0001 | <0.0001                         | 0.1021           | mnc, dnc                        |
| GSE10325 MYELOID VS LUPUS MYELOID DN                 | 197                 | 54 (27.4)                 | 54 (27.4)                   | 0 (0)                         | <0.0001 | <0.0001                         | 0.1009           | neu, mnc, dnc,<br>tcl, nkc, bcl |
| GSE18791 UNSTIM VS NEWCATSLE VIRUS DC 10H DN         | 190                 | 53 (27.9)                 | 53 (27.9)                   | 0 (0)                         | <0.0001 | <0.0001                         | 0.1002           | neu, mnc, dnc,<br>tcl, nkc, bcl |
| GSE29618 MONOCYTE VS PDC DAY7 FLU VACCINE UP         | 194                 | 53 (27.3)                 | 53 (27.3)                   | 0 (0)                         | <0.0001 | <0.0001                         | 0.0994           | neu, mnc, dnc                   |
| GSE13485 DAY7 VS DAY21 YF17D VACCINE PBMC UP         | 192                 | 52 (27.1)                 | 52 (27.1)                   | 0 (0)                         | <0.0001 | <0.0001                         | 0.0977           | neu, mnc, dnc,<br>tcl, nkc, bcl |
| GSE18791 UNSTIM VS NEWCATSLE VIRUS DC 6H DN          | 192                 | 52 (27.1)                 | 51 (26.6)                   | 1 (0.5)                       | <0.0001 | <0.0001                         | 0.0977           | neu, mnc, dnc,<br>tcl, nkc, bcl |
| GSE22886 NAIVE TCELL VS MONOCYTE DN                  | 197                 | 51 (25.9)                 | 51 (25.9)                   | 0 (0)                         | <0.0001 | <0.0001                         | 0.0948           |                                 |
| GSE29618 MONOCYTE VS MDC DAY7 FLU VACCINE UP         | 194                 | 50 (25.8)                 | 50 (25.8)                   | 0 (0)                         | <0.0001 | <0.0001                         | 0.0933           | neu, mnc                        |
| GSE10325 BCELL VS MYELOID DN                         | 196                 | 50 (25.5)                 | 50 (25.5)                   | 0 (0)                         | <0.0001 | <0.0001                         | 0.0929           | neu, mnc, dnc                   |
| GSE10325 LUPUS BCELL VS LUPUS MYELOID DN             | 194                 | 49 (25.3)                 | 49 (25.3)                   | 0 (0)                         | <0.0001 | <0.0001                         | 0.0912           | neu, mnc                        |
| GSE22886 NAIVE BCELL VS NEUTROPHIL DN                | 196                 | 49 (25)                   | 49 (25)                     | 0 (0)                         | <0.0001 | <0.0001                         | 0.0909           | mnc, dnc                        |
| GSE6269 HEALTHY VS STREP AUREUS INF PBMC DN          | 162                 | 46 (28.4)                 | 46 (28.4)                   | 0 (0)                         | <0.0001 | <0.0001                         | 0.0906           | neu, mnc, dnc,<br>tcl           |
| GSE18791 CTRL VS NEWCASTLE VIRUS DC 6H DN            | 192                 | 48 (25)                   | 48 (25)                     | 0 (0)                         | <0.0001 | <0.0001                         | 0.0896           | neu, mnc, dnc,<br>tcl, nkc, bcl |
| GSE24634 TEFF VS TCONV DAY3 IN CULTURE DN            | 188                 | 47 (25)                   | 46 (24.5)                   | 1 (0.5)                       | <0.0001 | <0.0001                         | 0.0882           | neu, mnc, dnc                   |
| GSE24634 IL4 VS CTRL TREATED NAIVE CD4 TCELL DAY3 DN | 189                 | 46 (24.3)                 | 46 (24.3)                   | 0 (0)                         | <0.0001 | <0.0001                         | 0.0860           | neu, mnc, dnc,<br>tcl, nkc, bcl |
| GSE22886 CTRL VS LPS 24H DC DN                       | 216                 | 48 (22.2)                 | 48 (22.2)                   | 0 (0)                         | <0.0001 | <0.0001                         | 0.0857           | neu, mnc, dnc,<br>tcl, nkc, bcl |
| GSE1432 1H VS 6H IFNG MICROGLIA DN                   | 198                 | 45 (22.7)                 | 45 (22.7)                   | 0 (0)                         | <0.0001 | <0.0001                         | 0.0826           | neu, mnc, dnc,<br>tcl, nkc, bcl |
| GSE18791 CTRL VS NEWCASTLE VIRUS DC 10H DN           | 193                 | 44 (22.8)                 | 44 (22.8)                   | 0 (0)                         | <0.0001 | <0.0001                         | 0.0813           | neu, mnc, dnc,<br>tcl, nkc, bcl |
| GSE18791 CTRL VS NEWCASTLE VIRUS DC 4H DN            | 184                 | 43 (23.4)                 | 43 (23.4)                   | 0 (0)                         | <0.0001 | <0.0001                         | 0.0807           | neu, mnc, dnc,<br>tcl, nkc, bcl |
| GSE10325 CD4 TCELL VS LUPUS CD4 TCELL DN             | 193                 | 43 (22.3)                 | 43 (22.3)                   | 0 (0)                         | <0.0001 | <0.0001                         | 0.0793           | neu, mnc, dnc,<br>tcl, nkc, bcl |
| GSE10325 BCELL VS LUPUS BCELL DN                     | 196                 | 43 (21.9)                 | 43 (21.9)                   | 0 (0)                         | <0.0001 | <0.0001                         | 0.0789           | neu, mnc, dnc,<br>tcl, nkc, bcl |
| GSE18791 CTRL VS NEWCASTLE VIRUS DC 12H DN           | 203                 | 43 (21.2)                 | 43 (21.2)                   | 0 (0)                         | <0.0001 | <0.0001                         | 0.0779           | neu, mnc, dnc,<br>tcl, nkc, bcl |

Appendix "PBMC response to AS03-H5N1 vaccine"

Howard, Goll et al.

| Category Name                                         | Category Genes # | Any-reg. DE Genes #(%) | Up-reg. DE Genes #(%) | Down-reg. DE Genes #(%) | P-Value | FDR Adjusted P-Value | Jaccard Index | Cell Type Overlap            |
|-------------------------------------------------------|------------------|------------------------|-----------------------|-------------------------|---------|----------------------|---------------|------------------------------|
| GSE24634 IL4 VS CTRL TREATED NAIVE CD4 TCELL DAY10 DN | 193              | 42 (21.8)              | 41 (21.2)             | 1 (0.5)                 | <0.0001 | <0.0001              | 0.0773        | neu, mnc, dnc, tcl, nkc, bcl |
| GSE1432 1H VS 24H IFNG MICROGLIA DN                   | 200              | 42 (21)                | 42 (21)               | 0 (0)                   | <0.0001 | <0.0001              | 0.0764        | neu, mnc, dnc, tcl, nkc, bcl |
| GSE24634 TREG VS TCONV POST DAY10 IL4 CONVERSION DN   | 196              | 41 (20.9)              | 41 (20.9)             | 0 (0)                   | <0.0001 | <0.0001              | 0.0750        | neu, mnc, dnc                |
| GSE18791 CTRL VS NEWCASTLE VIRUS DC 16H DN            | 188              | 40 (21.3)              | 40 (21.3)             | 0 (0)                   | <0.0001 | <0.0001              | 0.0741        | neu, mnc, dnc, tcl, nkc, bcl |
| GSE10325 CD4 TCELL VS MYELOID DN                      | 190              | 40 (21.1)              | 40 (21.1)             | 0 (0)                   | <0.0001 | <0.0001              | 0.0738        | neu, mnc, dnc                |
| GSE29618 PDC VS MDC DN                                | 193              | 40 (20.7)              | 40 (20.7)             | 0 (0)                   | <0.0001 | <0.0001              | 0.0734        | neu, mnc, dnc, tcl           |
| GSE29618 BCELL VS MONOCYTE DN                         | 194              | 40 (20.6)              | 40 (20.6)             | 0 (0)                   | <0.0001 | <0.0001              | 0.0733        | neu                          |
| GSE360 CTRL VS M TUBERCULOSIS DC DN                   | 199              | 40 (20.1)              | 40 (20.1)             | 0 (0)                   | <0.0001 | <0.0001              | 0.0726        | neu, mnc, dnc, tcl           |
| GSE2706 UNSTIM VS 8H R848 DC DN                       | 186              | 39 (21)                | 39 (21)               | 0 (0)                   | <0.0001 | <0.0001              | 0.0724        | neu, mnc, dnc, tcl, nkc, bcl |
| GSE34205 HEALTHY VS FLU INF INFANT PBMC DN            | 201              | 40 (19.9)              | 40 (19.9)             | 0 (0)                   | <0.0001 | <0.0001              | 0.0723        | neu, mnc, dnc, tcl, nkc      |
| GSE13485 DAY1 VS DAY3 YF17D VACCINE PBMC DN           | 190              | 39 (20.5)              | 39 (20.5)             | 0 (0)                   | <0.0001 | <0.0001              | 0.0718        | neu, mnc, dnc, tcl, nkc, bcl |
| GSE360 HIGH DOSE B MALAYI VS M TUBERCULOSIS DC DN     | 191              | 39 (20.4)              | 39 (20.4)             | 0 (0)                   | <0.0001 | <0.0001              | 0.0717        | neu, mnc, dnc, tcl, nkc, bcl |
| GSE16755 CTRL VS IFNA TREATED MAC DN                  | 193              | 38 (19.7)              | 38 (19.7)             | 0 (0)                   | <0.0001 | <0.0001              | 0.0695        | neu, mnc, dnc, tcl, nkc, bcl |
| GSE2706 UNSTIM VS 2H LPS AND R848 DC DN               | 188              | 37 (19.7)              | 37 (19.7)             | 0 (0)                   | <0.0001 | <0.0001              | 0.0681        | neu, mnc, dnc, tcl, nkc      |
| GSE18791 UNSTIM VS NEWCATSLE VIRUS DC 18H DN          | 191              | 37 (19.4)              | 37 (19.4)             | 0 (0)                   | <0.0001 | <0.0001              | 0.0678        | neu, mnc, dnc, tcl, nkc, bcl |
| GSE24634 TEFF VS TCONV DAY7 IN CULTURE DN             | 193              | 37 (19.2)              | 36 (18.7)             | 1 (0.5)                 | <0.0001 | <0.0001              | 0.0675        | neu, mnc, dnc                |
| GSE22886 DC VS MONOCYTE DN                            | 194              | 37 (19.1)              | 37 (19.1)             | 0 (0)                   | <0.0001 | <0.0001              | 0.0674        | neu, mnc, dnc                |
| GSE360 T GONDII VS M TUBERCULOSIS DC DN               | 194              | 37 (19.1)              | 37 (19.1)             | 0 (0)                   | <0.0001 | <0.0001              | 0.0674        | neu, mnc, dnc, tcl           |
| GSE2706 2H VS 8H R848 STIM DC DN                      | 186              | 36 (19.4)              | 36 (19.4)             | 0 (0)                   | <0.0001 | <0.0001              | 0.0664        | neu, mnc, dnc, tcl, nkc, bcl |
| GSE6269 HEALTHY VS FLU INF PBMC DN                    | 155              | 34 (21.9)              | 34 (21.9)             | 0 (0)                   | <0.0001 | <0.0001              | 0.0663        | neu, mnc, dnc, tcl, nkc      |
| GSE2706 UNSTIM VS 8H LPS AND R848 DC DN               | 188              | 36 (19.1)              | 35 (18.6)             | 1 (0.5)                 | <0.0001 | <0.0001              | 0.0662        | neu, mnc, dnc, tcl           |

| Category Name                                        | Category Genes # | Any-reg. DE Genes #(%) | Up-reg. DE Genes #(%) | Down-reg. DE Genes #(%) | P-Value | FDR Adjusted P-Value | Jaccard Index | Cell Type Overlap            |
|------------------------------------------------------|------------------|------------------------|-----------------------|-------------------------|---------|----------------------|---------------|------------------------------|
| GSE360 LOW DOSE B MALAYI VS M TUBERCULOSIS DC DN     | 190              | 36 (18.9)              | 36 (18.9)             | 0 (0)                   | <0.0001 | <0.0001              | 0.0659        | neu, mnc, dnc, tcl           |
| GSE22886 NAIVE TCELL VS NEUTROPHIL DN                | 199              | 36 (18.1)              | 35 (17.6)             | 1 (0.5)                 | <0.0001 | <0.0001              | 0.0649        | mnc                          |
| GSE14000 UNSTIM VS 16H LPS DC TRANSLATED RNA DN      | 192              | 35 (18.2)              | 35 (18.2)             | 0 (0)                   | <0.0001 | <0.0001              | 0.0638        | neu, mnc, dnc, tcl, nkc, bcl |
| GSE360 L DONOVANI VS M TUBERCULOSIS DC DN            | 194              | 35 (18)                | 35 (18)               | 0 (0)                   | <0.0001 | <0.0001              | 0.0635        | neu, mnc, dnc, tcl           |
| GSE29618 BCELL VS MONOCYTE DAY7 FLU VACCINE DN       | 197              | 35 (17.8)              | 35 (17.8)             | 0 (0)                   | <0.0001 | <0.0001              | 0.0632        |                              |
| GSE22886 NAIVE BCELL VS MONOCYTE DN                  | 199              | 35 (17.6)              | 35 (17.6)             | 0 (0)                   | <0.0001 | <0.0001              | 0.0629        |                              |
| GSE24634 TREG VS TCONV POST DAY7 IL4 CONVERSION DN   | 193              | 34 (17.6)              | 34 (17.6)             | 0 (0)                   | <0.0001 | <0.0001              | 0.0617        | neu, mnc                     |
| GSE6269 HEALTHY VS STREP PNEUMO INF PBMC DN          | 163              | 32 (19.6)              | 32 (19.6)             | 0 (0)                   | <0.0001 | <0.0001              | 0.0612        | neu, mnc, dnc                |
| GSE2706 2H VS 8H LPS STIM DC DN                      | 189              | 33 (17.5)              | 33 (17.5)             | 0 (0)                   | <0.0001 | <0.0001              | 0.0602        | neu, mnc, dnc, tcl, nkc, bcl |
| GSE2706 UNSTIM VS 2H LPS DC DN                       | 189              | 32 (16.9)              | 32 (16.9)             | 0 (0)                   | <0.0001 | <0.0001              | 0.0583        | neu, mnc, dnc, tcl, nkc      |
| GSE3982 EOSINOPHIL VS NEUTROPHIL DN                  | 189              | 32 (16.9)              | 32 (16.9)             | 0 (0)                   | <0.0001 | <0.0001              | 0.0583        | neu, mnc, dnc, tcl           |
| GSE29618 PDC VS MDC DAY7 FLU VACCINE DN              | 190              | 32 (16.8)              | 32 (16.8)             | 0 (0)                   | <0.0001 | <0.0001              | 0.0582        | neu, mnc                     |
| GSE9988 ANTI TREM1 VS LPS MONOCYTE DN                | 191              | 32 (16.8)              | 32 (16.8)             | 0 (0)                   | <0.0001 | <0.0001              | 0.0581        | neu, mnc, dnc                |
| GSE13484 3H UNSTIM VS YF17D VACCINE STIM PBMC DN     | 193              | 32 (16.6)              | 32 (16.6)             | 0 (0)                   | <0.0001 | <0.0001              | 0.0579        | neu, mnc, dnc, tcl           |
| GSE2706 UNSTIM VS 8H LPS DC DN                       | 193              | 32 (16.6)              | 32 (16.6)             | 0 (0)                   | <0.0001 | <0.0001              | 0.0579        | neu, mnc, dnc, tcl           |
| GSE11057 CD4 EFF MEM VS PBMC DN                      | 194              | 32 (16.5)              | 31 (16)               | 1 (0.5)                 | <0.0001 | <0.0001              | 0.0578        | neu, mnc                     |
| GSE2706 R848 VS R848 AND LPS 2H STIM DC DN           | 181              | 31 (17.1)              | 31 (17.1)             | 0 (0)                   | <0.0001 | <0.0001              | 0.0572        | neu, mnc, dnc, tcl, nkc, bcl |
| GSE6269 FLU VS STREP PNEUMO INF PBMC UP              | 165              | 30 (18.2)              | 30 (18.2)             | 0 (0)                   | <0.0001 | <0.0001              | 0.0569        | neu, mnc, dnc, tcl, nkc, bcl |
| GSE9988 ANTI TREM1 VS LOW LPS MONOCYTE DN            | 187              | 31 (16.6)              | 31 (16.6)             | 0 (0)                   | <0.0001 | <0.0001              | 0.0566        | neu, mnc, dnc                |
| GSE3982 NEUTROPHIL VS NKCELL UP                      | 210              | 32 (15.2)              | 32 (15.2)             | 0 (0)                   | <0.0001 | <0.0001              | 0.0561        | neu, mnc, dnc                |
| GSE24634 IL4 VS CTRL TREATED NAIVE CD4 TCELL DAY7 DN | 192              | 31 (16.1)              | 31 (16.1)             | 0 (0)                   | <0.0001 | <0.0001              | 0.0561        | neu, mnc, dnc                |
| GSE14769 UNSTIM VS 80MIN LPS BMDM DN                 | 196              | 31 (15.8)              | 31 (15.8)             | 0 (0)                   | <0.0001 | <0.0001              | 0.0557        | neu, mnc, dnc, tcl           |
| GSE3982 CTRL VS LPS 48H DC DN                        | 198              | 31 (15.7)              | 31 (15.7)             | 0 (0)                   | <0.0001 | <0.0001              | 0.0555        | neu, mnc, dnc, tcl, nkc      |
| GSE15767 MED VS SCS MAC LN UP                        | 194              | 30 (15.5)              | 29 (14.9)             | 1 (0.5)                 | <0.0001 | <0.0001              | 0.0540        | mnc, dnc                     |

| Category Name                                                | Category Genes # | Any-reg. DE Genes #(%) | Up-reg. DE Genes #(%) | Down-reg. DE Genes #(%) | P-Value | FDR Adjusted P-Value | Jaccard Index | Cell Type Overlap            |
|--------------------------------------------------------------|------------------|------------------------|-----------------------|-------------------------|---------|----------------------|---------------|------------------------------|
| GSE2706 2H VS 8H R848 AND LPS STIM DC DN                     | 197              | 30 (15.2)              | 30 (15.2)             | 0 (0)                   | <0.0001 | <0.0001              | 0.0537        | neu, mnc, dnc, tcl, bcl      |
| GSE18791 CTRL VS NEWCASTLE VIRUS DC 14H DN                   | 186              | 29 (15.6)              | 29 (15.6)             | 0 (0)                   | <0.0001 | <0.0001              | 0.0528        | neu, mnc, dnc, tcl, nkc, bcl |
| GSE2706 UNSTIM VS 2H R848 DC DN                              | 187              | 29 (15.5)              | 29 (15.5)             | 0 (0)                   | <0.0001 | <0.0001              | 0.0527        | neu, mnc, dnc, tcl, nkc      |
| GSE24634 TEFF VS TCONV DAY10 IN CULTURE DN                   | 189              | 29 (15.3)              | 29 (15.3)             | 0 (0)                   | <0.0001 | <0.0001              | 0.0525        | neu, mnc                     |
| GSE22886 NAIVE CD4 TCELL VS NEUTROPHIL DN                    | 212              | 30 (14.2)              | 29 (13.7)             | 1 (0.5)                 | <0.0001 | <0.0001              | 0.0523        | neu, mnc                     |
| GSE360 L DONOVANI VS M TUBERCULOSIS MAC DN                   | 193              | 29 (15)                | 29 (15)               | 0 (0)                   | <0.0001 | <0.0001              | 0.0522        | neu, mnc, dnc, tcl, bcl      |
| GSE22886 NAIVE CD8 TCELL VS NEUTROPHIL DN                    | 197              | 29 (14.7)              | 28 (14.2)             | 1 (0.5)                 | <0.0001 | <0.0001              | 0.0518        | mnc                          |
| GSE14769 UNSTIM VS 120MIN LPS BMDM DN                        | 200              | 29 (14.5)              | 28 (14)               | 1 (0.5)                 | <0.0001 | <0.0001              | 0.0515        | neu, mnc, dnc, tcl           |
| GSE11057 CD4 CENT MEM VS PBMC DN                             | 185              | 28 (15.1)              | 27 (14.6)             | 1 (0.5)                 | <0.0001 | <0.0001              | 0.0510        | neu, mnc, dnc                |
| GSE24634 TREG VS TCONV POST DAY3 IL4 CONVERSION DN           | 193              | 28 (14.5)              | 28 (14.5)             | 0 (0)                   | <0.0001 | <0.0001              | 0.0503        | dnc                          |
| GSE360 L DONOVANI VS B MALAYI HIGH DOSE DC UP                | 186              | 27 (14.5)              | 27 (14.5)             | 0 (0)                   | <0.0001 | <0.0001              | 0.0490        | neu, mnc, dnc                |
| GSE17974 IL4 AND ANTI IL12 VS UNTREATED 24H ACT CD4 TCELL DN | 192              | 27 (14.1)              | 27 (14.1)             | 0 (0)                   | <0.0001 | <0.0001              | 0.0485        | neu, mnc, dnc, tcl, nkc      |
| GSE24081 CONTROLLER VS PROGRESSOR HIV SPECIFIC CD8 TCELL DN  | 184              | 26 (14.1)              | 25 (13.6)             | 1 (0.5)                 | <0.0001 | <0.0001              | 0.0473        | neu, mnc, dnc, tcl, nkc, bcl |
| GSE9988 LPS VS CTRL TREATED MONOCYTE UP                      | 185              | 26 (14.1)              | 26 (14.1)             | 0 (0)                   | <0.0001 | <0.0001              | 0.0472        | neu, mnc, tcl                |
| GSE11864 CSF1 PAM3CYS VS CSF1 IFNG PAM3CYS IN MAC DN         | 189              | 26 (13.8)              | 26 (13.8)             | 0 (0)                   | <0.0001 | <0.0001              | 0.0468        | neu, mnc, dnc, tcl           |
| GSE17974 IL4 AND ANTI IL12 VS UNTREATED 72H ACT CD4 TCELL DN | 190              | 26 (13.7)              | 26 (13.7)             | 0 (0)                   | <0.0001 | <0.0001              | 0.0468        | neu, mnc, dnc, tcl, nkc, bcl |
| GSE24634 TREG VS TCONV POST DAY5 IL4 CONVERSION DN           | 189              | 26 (13.8)              | 26 (13.8)             | 0 (0)                   | <0.0001 | <0.0001              | 0.0468        | neu, dnc                     |
| GSE24634 IL4 VS CTRL TREATED NAIVE CD4 TCELL DAY5 DN         | 191              | 26 (13.6)              | 26 (13.6)             | 0 (0)                   | <0.0001 | <0.0001              | 0.0467        | neu, mnc, dnc, tcl, nkc, bcl |
| GSE360 HIGH DOSE B MALAYI VS M TUBERCULOSIS MAC DN           | 205              | 26 (12.7)              | 26 (12.7)             | 0 (0)                   | <0.0001 | <0.0001              | 0.0455        | neu, mnc, dnc, tcl, bcl      |
| GSE360 CTRL VS L MAJOR DC DN                                 | 191              | 25 (13.1)              | 25 (13.1)             | 0 (0)                   | <0.0001 | <0.0001              | 0.0448        | neu, mnc, dnc, tcl           |
| GSE9006 TYPE 1 DIABETES AT DX VS 4MONTH POST DX PBMC UP      | 192              | 25 (13)                | 25 (13)               | 0 (0)                   | <0.0001 | <0.0001              | 0.0447        | mnc, dnc                     |
| GSE14769 UNSTIM VS 60MIN LPS BMDM DN                         | 200              | 25 (12.5)              | 24 (12)               | 1 (0.5)                 | <0.0001 | <0.0001              | 0.0441        | neu, mnc                     |
| GSE15930 STIM VS STIM AND IFNAB 48H CD8 T CELL DN            | 200              | 25 (12.5)              | 25 (12.5)             | 0 (0)                   | <0.0001 | <0.0001              | 0.0441        | neu, mnc, dnc, tcl, nkc      |

| Category Name                                                | Category Genes # | Any-reg. DE Genes #(%) | Up-reg. DE Genes #(%) | Down-reg. DE Genes #(%) | P-Value | FDR Adjusted P-Value | Jaccard Index | Cell Type Overlap            |
|--------------------------------------------------------------|------------------|------------------------|-----------------------|-------------------------|---------|----------------------|---------------|------------------------------|
| GSE17974 IL4 AND ANTI IL12 VS UNTREATED 48H ACT CD4 TCELL DN | 188              | 24 (12.8)              | 24 (12.8)             | 0 (0)                   | <0.0001 | <0.0001              | 0.0432        | neu, mnc, dnc, tcl, nkc, bcl |
| GSE9988 LOW LPS VS ANTI TREM1 AND LPS MONOCYTE UP            | 190              | 24 (12.6)              | 24 (12.6)             | 0 (0)                   | <0.0001 | <0.0001              | 0.0430        | neu, mnc                     |
| GSE22886 NAIVE CD8 TCELL VS DC DN                            | 197              | 24 (12.2)              | 24 (12.2)             | 0 (0)                   | <0.0001 | <0.0001              | 0.0425        | neu                          |
| GSE34205 HEALTHY VS RSV INF INFANT PBMC DN                   | 199              | 24 (12.1)              | 24 (12.1)             | 0 (0)                   | <0.0001 | <0.0001              | 0.0423        | mnc, dnc                     |
| GSE14000 UNSTIM VS 16H LPS DC DN                             | 206              | 24 (11.7)              | 24 (11.7)             | 0 (0)                   | <0.0001 | <0.0001              | 0.0418        | neu, mnc, dnc, tcl           |
| GSE18791 CTRL VS NEWCASTLE VIRUS DC 18H DN                   | 183              | 23 (12.6)              | 23 (12.6)             | 0 (0)                   | <0.0001 | <0.0001              | 0.0417        | neu, mnc, dnc, tcl, nkc, bcl |
| GSE9988 ANTI TREM1 VS ANTI TREM1 AND LPS MONOCYTE DN         | 183              | 23 (12.6)              | 23 (12.6)             | 0 (0)                   | <0.0001 | <0.0001              | 0.0417        | neu, mnc                     |
| GSE9988 LOW LPS VS VEHICLE TREATED MONOCYTE UP               | 182              | 23 (12.6)              | 23 (12.6)             | 0 (0)                   | <0.0001 | <0.0001              | 0.0417        | neu, mnc                     |
| GSE9006 HEALTHY VS TYPE 1 DIABETES PBMC AT DX DN             | 184              | 23 (12.5)              | 23 (12.5)             | 0 (0)                   | <0.0001 | <0.0001              | 0.0416        | mnc, dnc                     |
| GSE9988 LOW LPS VS CTRL TREATED MONOCYTE UP                  | 184              | 23 (12.5)              | 23 (12.5)             | 0 (0)                   | <0.0001 | <0.0001              | 0.0416        | neu, mnc, tcl                |
| GSE3982 DC VS MAC LPS STIM DN                                | 186              | 23 (12.4)              | 22 (11.8)             | 1 (0.5)                 | <0.0001 | <0.0001              | 0.0414        | neu, mnc, dnc                |
| GSE9988 LPS VS LPS AND ANTI TREM1 MONOCYTE UP                | 188              | 23 (12.2)              | 23 (12.2)             | 0 (0)                   | <0.0001 | <0.0001              | 0.0413        | neu, mnc, dnc                |
| GSE22886 DAY0 VS DAY7 MONOCYTE IN CULTURE UP                 | 192              | 23 (12)                | 23 (12)               | 0 (0)                   | <0.0001 | <0.0001              | 0.0410        | neu                          |
| GSE11057 NAIVE CD4 VS PBMC CD4 TCELL DN                      | 193              | 23 (11.9)              | 22 (11.4)             | 1 (0.5)                 | <0.0001 | <0.0001              | 0.0409        | neu, mnc, dnc                |
| GSE13485 DAY3 VS DAY21 YF17D VACCINE PBMC UP                 | 194              | 23 (11.9)              | 23 (11.9)             | 0 (0)                   | <0.0001 | <0.0001              | 0.0409        | neu, mnc, dnc, tcl, nkc      |
| GSE3982 CTRL VS LPS 4H MAC DN                                | 194              | 23 (11.9)              | 23 (11.9)             | 0 (0)                   | <0.0001 | <0.0001              | 0.0409        | neu, mnc, dnc, tcl, nkc      |
| GSE3982 NEUTROPHIL VS CENT MEMORY CD4 TCELL UP               | 206              | 23 (11.2)              | 23 (11.2)             | 0 (0)                   | <0.0001 | <0.0001              | 0.0400        | neu, mnc, dnc                |
| GSE29617 DAY3 VS DAY7 TIV FLU VACCINE PBMC 2008 UP           | 181              | 22 (12.2)              | 22 (12.2)             | 0 (0)                   | <0.0001 | <0.0001              | 0.0399        | neu, mnc, dnc, tcl           |
| GSE9988 LPS VS VEHICLE TREATED MONOCYTE UP                   | 184              | 22 (12)                | 22 (12)               | 0 (0)                   | <0.0001 | <0.0001              | 0.0397        | neu, mnc                     |
| GSE360 CTRL VS T GONDII DC DN                                | 187              | 22 (11.8)              | 22 (11.8)             | 0 (0)                   | <0.0001 | <0.0001              | 0.0395        | neu, mnc, dnc, tcl           |
| GSE9006 1MONTH VS 4MONTH POST TYPE 1 DIABETES DX PBMC UP     | 189              | 22 (11.6)              | 22 (11.6)             | 0 (0)                   | <0.0001 | <0.0001              | 0.0394        | neu, mnc, dnc                |
| GSE17721 PAM3CSK4 VS CPG 4H BMDM DN                          | 190              | 22 (11.6)              | 21 (11.1)             | 1 (0.5)                 | <0.0001 | <0.0001              | 0.0393        | neu, mnc, dnc, tcl, bcl      |
| GSE360 T GONDII VS B MALAYI HIGH DOSE DC UP                  | 190              | 22 (11.6)              | 22 (11.6)             | 0 (0)                   | <0.0001 | <0.0001              | 0.0393        | neu, mnc, dnc, tcl           |
| GSE360 T GONDII VS M TUBERCULOSIS MAC DN                     | 194              | 22 (11.3)              | 22 (11.3)             | 0 (0)                   | <0.0001 | <0.0001              | 0.0390        | neu, mnc, dnc, bcl           |
| GSE3982 NEUTROPHIL VS EFF MEMORY CD4 TCELL UP                | 197              | 22 (11.2)              | 22 (11.2)             | 0 (0)                   | <0.0001 | <0.0001              | 0.0388        | neu, mnc, dnc                |
| GSE22886 DAY1 VS DAY7 MONOCYTE IN CULTURE UP                 | 191              | 21 (11)                | 21 (11)               | 0 (0)                   | <0.0001 | <0.0001              | 0.0374        | neu, mnc                     |

Appendix "PBMC response to AS03-H5N1 vaccine"

Howard, Goll et al.

| Category Name                                              | Category Genes # | Any-reg. DE Genes #(%) | Up-reg. DE Genes #(%) | Down-reg. DE Genes #(%) | P-Value | FDR Adjusted P-Value | Jaccard Index | Cell Type Overlap            |
|------------------------------------------------------------|------------------|------------------------|-----------------------|-------------------------|---------|----------------------|---------------|------------------------------|
| GSE1432 CTRL VS IFNG 1H MICROGLIA DN                       | 192              | 21 (10.9)              | 21 (10.9)             | 0 (0)                   | <0.0001 | <0.0001              | 0.0373        | neu, mnc, dnc, tcl, nkc, bcl |
| GSE22886 NAIVE TCELL VS DC DN                              | 195              | 21 (10.8)              | 21 (10.8)             | 0 (0)                   | <0.0001 | <0.0001              | 0.0371        | neu                          |
| GSE2706 R848 VS LPS 2H STIM DC DN                          | 176              | 20 (11.4)              | 20 (11.4)             | 0 (0)                   | <0.0001 | <0.0001              | 0.0365        | neu, mnc, dnc, tcl, bcl      |
| GSE29617 CTRL VS DAY7 TIV FLU VACCINE PBMC 2008 UP         | 184              | 20 (10.9)              | 20 (10.9)             | 0 (0)                   | <0.0001 | <0.0001              | 0.0360        | neu, mnc, dnc                |
| GSE6269 FLU VS E COLI INF PBMC UP                          | 159              | 19 (11.9)              | 19 (11.9)             | 0 (0)                   | <0.0001 | <0.0001              | 0.0357        | neu, mnc, dnc, tcl           |
| GSE22886 DAY0 VS DAY1 MONOCYTE IN CULTURE DN               | 191              | 20 (10.5)              | 20 (10.5)             | 0 (0)                   | <0.0001 | <0.0001              | 0.0355        | neu, mnc                     |
| GSE360 L MAJOR VS B MALAYI HIGH DOSE DC UP                 | 191              | 20 (10.5)              | 20 (10.5)             | 0 (0)                   | <0.0001 | <0.0001              | 0.0355        | neu, mnc, dnc                |
| GSE6269 FLU VS STREP AUREUS INF PBMC UP                    | 162              | 19 (11.7)              | 19 (11.7)             | 0 (0)                   | <0.0001 | <0.0001              | 0.0355        | neu, mnc, dnc, tcl, nkc      |
| GSE24026 PD1 LIGATION VS CTRL IN ACT TCELL LINE UP         | 193              | 20 (10.4)              | 20 (10.4)             | 0 (0)                   | <0.0001 | <0.0001              | 0.0354        | neu, mnc, dnc, tcl, nkc, bcl |
| GSE29618 BCELL VS MDC DAY7 FLU VACCINE DN                  | 196              | 20 (10.2)              | 20 (10.2)             | 0 (0)                   | <0.0001 | <0.0001              | 0.0352        |                              |
| GSE14769 UNSTIM VS 40MIN LPS BMDM DN                       | 197              | 20 (10.2)              | 20 (10.2)             | 0 (0)                   | <0.0001 | <0.0001              | 0.0351        | neu, mnc, dnc                |
| GSE30083 SP2 VS SP4 THYMOCYTE DN                           | 198              | 20 (10.1)              | 20 (10.1)             | 0 (0)                   | <0.0001 | <0.0001              | 0.0351        | neu, mnc, dnc, tcl           |
| GSE3982 DC VS BASOPHIL UP                                  | 202              | 20 (9.9)               | 19 (9.4)              | 1 (0.5)                 | <0.0001 | <0.0001              | 0.0348        |                              |
| GSE360 T GONDII VS B MALAYI LOW DOSE DC UP                 | 182              | 19 (10.4)              | 19 (10.4)             | 0 (0)                   | <0.0001 | <0.0001              | 0.0342        | neu, mnc, dnc, tcl, nkc      |
| GSE360 DC VS MAC M TUBERCULOSIS UP                         | 186              | 19 (10.2)              | 19 (10.2)             | 0 (0)                   | <0.0001 | <0.0001              | 0.0340        | neu, mnc, dnc, tcl, nkc      |
| GSE360 L DONOVANI VS B MALAYI HIGH DOSE MAC UP             | 189              | 19 (10.1)              | 18 (9.5)              | 1 (0.5)                 | <0.0001 | <0.0001              | 0.0338        | mnc                          |
| GSE2197 CPG DNA VS UNTREATED IN DC UP                      | 193              | 19 (9.8)               | 18 (9.3)              | 1 (0.5)                 | <0.0001 | <0.0001              | 0.0336        | neu, mnc                     |
| GSE24634 IL4 VS CTRL TREATED NAIVE CD4 TCELL DAY5 UP       | 192              | 19 (9.9)               | 18 (9.4)              | 1 (0.5)                 | <0.0001 | <0.0001              | 0.0336        | neu, mnc                     |
| GSE3982 DC VS CENT MEMORY CD4 TCELL UP                     | 192              | 19 (9.9)               | 17 (8.9)              | 2 (1)                   | <0.0001 | <0.0001              | 0.0336        | mnc, dnc                     |
| GSE24142 EARLY THYMIC PROGENITOR VS DN2 THYMOCYTE FETAL UP | 195              | 19 (9.7)               | 19 (9.7)              | 0 (0)                   | <0.0001 | <0.0001              | 0.0335        | neu, mnc, dnc                |
| GSE3337 CTRL VS 4H IFNG IN CD8POS DC DN                    | 195              | 19 (9.7)               | 19 (9.7)              | 0 (0)                   | <0.0001 | <0.0001              | 0.0335        | neu, mnc, dnc, tcl, nkc, bcl |
| GSE3982 DC VS NKCELL UP                                    | 195              | 19 (9.7)               | 19 (9.7)              | 0 (0)                   | <0.0001 | <0.0001              | 0.0335        | neu, dnc                     |
| GSE3982 DC VS TH2 UP                                       | 194              | 19 (9.8)               | 19 (9.8)              | 0 (0)                   | <0.0001 | <0.0001              | 0.0335        |                              |
| GSE17721 CTRL VS POLYIC 4H BMDM DN                         | 196              | 19 (9.7)               | 19 (9.7)              | 0 (0)                   | <0.0001 | <0.0001              | 0.0334        | neu, mnc, dnc, tcl           |
| GSE17721 LPS VS PAM3CSK4 2H BMDM UP                        | 196              | 19 (9.7)               | 18 (9.2)              | 1 (0.5)                 | <0.0001 | <0.0001              | 0.0334        | neu, mnc, dnc                |
| GSE360 DC VS MAC B MALAYI HIGH DOSE DN                     | 196              | 19 (9.7)               | 19 (9.7)              | 0 (0)                   | <0.0001 | <0.0001              | 0.0334        | neu, mnc, dnc                |

Appendix "PBMC response to AS03-H5N1 vaccine"

Howard, Goll et al.



| Category Name                                              | Category Genes # | Any-reg. DE Genes #(%) | Up-reg. DE Genes #(%) | Down-reg. DE Genes #(%) | P-Value | FDR Adjusted P-Value | Jaccard Index | Cell Type Overlap            |
|------------------------------------------------------------|------------------|------------------------|-----------------------|-------------------------|---------|----------------------|---------------|------------------------------|
| GSE24142 EARLY THYMIC PROGENITOR VS DN3 THYMOCYTE UP       | 197              | 19 (9.6)               | 19 (9.6)              | 0 (0)                   | <0.0001 | <0.0001              | 0.0333        |                              |
| GSE3982 MAST CELL VS DC DN                                 | 198              | 19 (9.6)               | 19 (9.6)              | 0 (0)                   | <0.0001 | <0.0001              | 0.0333        | neu                          |
| GSE15930 STIM VS STIM AND TRICHOSTATINA 48H CD8 T CELL DN  | 199              | 19 (9.5)               | 19 (9.5)              | 0 (0)                   | <0.0001 | <0.0001              | 0.0332        | neu, mnc, dnc, tcl, nkc      |
| GSE3982 DC VS TH1 UP                                       | 203              | 19 (9.4)               | 18 (8.9)              | 1 (0.5)                 | <0.0001 | <0.0001              | 0.0330        |                              |
| GSE12845 PRE GC VS DARKZONE GC TONSIL BCELL UP             | 185              | 18 (9.7)               | 18 (9.7)              | 0 (0)                   | <0.0001 | <0.0001              | 0.0322        | neu, mnc, dnc                |
| GSE3982 DC VS EFF MEMORY CD4 TCELL UP                      | 190              | 18 (9.5)               | 18 (9.5)              | 0 (0)                   | <0.0001 | <0.0001              | 0.0319        | neu                          |
| GSE3982 NEUTROPHIL VS BCELL UP                             | 192              | 18 (9.4)               | 18 (9.4)              | 0 (0)                   | <0.0001 | <0.0001              | 0.0318        | neu, mnc                     |
| GSE13484 12H UNSTIM VS YF17D VACCINE STIM PBMC DN          | 193              | 18 (9.3)               | 18 (9.3)              | 0 (0)                   | <0.0001 | <0.0001              | 0.0317        | neu, mnc, dnc, tcl           |
| GSE17721 PAM3CSK4 VS GADIQUIMOD 4H BMDM DN                 | 194              | 18 (9.3)               | 18 (9.3)              | 0 (0)                   | <0.0001 | <0.0001              | 0.0317        | neu, mnc, dnc, tcl, nkc      |
| GSE22886 DAY0 VS DAY1 MONOCYTE IN CULTURE UP               | 198              | 18 (9.1)               | 18 (9.1)              | 0 (0)                   | <0.0001 | <0.0001              | 0.0315        | neu                          |
| GSE3982 DC VS BCELL UP                                     | 207              | 18 (8.7)               | 17 (8.2)              | 1 (0.5)                 | <0.0001 | <0.0001              | 0.0310        |                              |
| GSE2706 R848 VS LPS 8H STIM DC DN                          | 176              | 17 (9.7)               | 17 (9.7)              | 0 (0)                   | <0.0001 | <0.0001              | 0.0309        | neu, mnc, dnc                |
| GSE3982 EOSINOPHIL VS EFF MEMORY CD4 TCELL UP              | 182              | 17 (9.3)               | 16 (8.8)              | 1 (0.5)                 | <0.0001 | <0.0001              | 0.0305        | neu, mnc                     |
| GSE2706 LPS VS R848 AND LPS 8H STIM DC UP                  | 184              | 17 (9.2)               | 17 (9.2)              | 0 (0)                   | <0.0001 | <0.0001              | 0.0304        | neu, mnc, dnc, tcl, bcl      |
| GSE360 CTRL VS M TUBERCULOSIS MAC DN                       | 185              | 17 (9.2)               | 17 (9.2)              | 0 (0)                   | <0.0001 | <0.0001              | 0.0304        | neu, mnc                     |
| GSE15733 BM VS SPLEEN MEMORY CD4 TCELL UP                  | 190              | 17 (8.9)               | 17 (8.9)              | 0 (0)                   | <0.0001 | <0.0001              | 0.0301        |                              |
| GSE34205 RSV VS FLU INF INFANT PBMC DN                     | 189              | 17 (9)                 | 17 (9)                | 0 (0)                   | <0.0001 | <0.0001              | 0.0301        | neu, mnc, dnc, tcl, nkc      |
| GSE3982 MAC VS BCELL UP                                    | 190              | 17 (8.9)               | 16 (8.4)              | 1 (0.5)                 | <0.0001 | <0.0001              | 0.0301        |                              |
| GSE13484 UNSTIM VS 3H YF17D VACCINE STIM PBMC DN           | 192              | 17 (8.9)               | 17 (8.9)              | 0 (0)                   | <0.0001 | <0.0001              | 0.0300        | neu, mnc, dnc                |
| GSE17721 LPS VS GADIQUIMOD 2H BMDM UP                      | 192              | 17 (8.9)               | 16 (8.3)              | 1 (0.5)                 | <0.0001 | <0.0001              | 0.0300        | neu, mnc                     |
| GSE360 LOW DOSE B MALAYI VS M TUBERCULOSIS MAC DN          | 191              | 17 (8.9)               | 17 (8.9)              | 0 (0)                   | <0.0001 | <0.0001              | 0.0300        | neu, mnc, dnc, tcl, bcl      |
| GSE3982 EFF MEMORY CD4 TCELL VS NKCELL DN                  | 192              | 17 (8.9)               | 17 (8.9)              | 0 (0)                   | <0.0001 | <0.0001              | 0.0300        |                              |
| GSE7460 CD8 TCELL VS CD4 TCELL ACT UP                      | 192              | 17 (8.9)               | 17 (8.9)              | 0 (0)                   | <0.0001 | <0.0001              | 0.0300        | neu, mnc, dnc, tcl, bcl      |
| GSE22886 NAIVE BCELL VS DC DN                              | 196              | 17 (8.7)               | 17 (8.7)              | 0 (0)                   | <0.0001 | <0.0001              | 0.0298        | neu                          |
| GSE24142 EARLY THYMIC PROGENITOR VS DN2 THYMOCYTE ADULT UP | 195              | 17 (8.7)               | 17 (8.7)              | 0 (0)                   | <0.0001 | <0.0001              | 0.0298        | dnc                          |
| GSE1460 DP VS CD4 THYMOCYTE DN                             | 197              | 17 (8.6)               | 17 (8.6)              | 0 (0)                   | <0.0001 | <0.0001              | 0.0297        | neu, mnc, dnc, tcl, nkc, bcl |
| GSE29618 BCELL VS MDC DN                                   | 197              | 17 (8.6)               | 17 (8.6)              | 0 (0)                   | <0.0001 | <0.0001              | 0.0297        |                              |
| GSE14769 UNSTIM VS 240MIN LPS BMDM DN                      | 199              | 17 (8.5)               | 17 (8.5)              | 0 (0)                   | <0.0001 | <0.0001              | 0.0296        | neu, mnc, dnc                |

| Category Name                                               | Category<br>Genes # | Any-reg. DE<br>Genes #(%) | Up-reg.<br>DE Genes<br>#(%) | Down-reg.<br>DE Genes<br>#(%) | P-Value | FDR<br>Ad-<br>justed<br>P-Value | Jaccard<br>Index | Cell Type Over-<br>lap     |
|-------------------------------------------------------------|---------------------|---------------------------|-----------------------------|-------------------------------|---------|---------------------------------|------------------|----------------------------|
| GSE17721 12H VS 24H CPG BMDM UP                             | 199                 | 17 (8.5)                  | 16 (8)                      | 1 (0.5)                       | <0.0001 | <0.0001                         | 0.0296           | neu, dnc                   |
| GSE22886 NAIVE CD4 TCELL VS DC DN                           | 199                 | 17 (8.5)                  | 17 (8.5)                    | 0 (0)                         | <0.0001 | <0.0001                         | 0.0296           | neu                        |
| GSE6269 HEALTHY VS E COLI INF PBMC DN                       | 164                 | 16 (9.8)                  | 16 (9.8)                    | 0 (0)                         | <0.0001 | <0.0001                         | 0.0296           | mnc                        |
| GSE360 L MAJOR VS M TUBERCULOSIS DC DN                      | 180                 | 16 (8.9)                  | 16 (8.9)                    | 0 (0)                         | <0.0001 | <0.0001                         | 0.0288           | neu, mnc, dnc              |
| GSE17974 IL4 AND ANTI IL12 VS UNTREATED 6H ACT CD4 TCELL DN | 185                 | 16 (8.6)                  | 15 (8.1)                    | 1 (0.5)                       | <0.0001 | <0.0001                         | 0.0285           | neu, mnc, dnc,<br>tcl, bcl |
| GSE9988 ANTI TREM1 VS CTRL TREATED MONOCYTES UP             | 187                 | 16 (8.6)                  | 15 (8)                      | 1 (0.5)                       | <0.0001 | <0.0001                         | 0.0284           |                            |
| GSE3982 EOSINOPHIL VS CENT MEMORY CD4 TCELL UP              | 189                 | 16 (8.5)                  | 16 (8.5)                    | 0 (0)                         | <0.0001 | <0.0001                         | 0.0283           | neu                        |
| GSE17721 PAM3CSK4 VS GADIQUIMOD 16H BMDM DN                 | 191                 | 16 (8.4)                  | 16 (8.4)                    | 0 (0)                         | <0.0001 | <0.0001                         | 0.0282           | neu, mnc, dnc              |
| GSE9988 ANTI TREM1 VS VEHICLE TREATED MONOCYTES DN          | 192                 | 16 (8.3)                  | 16 (8.3)                    | 0 (0)                         | <0.0001 | <0.0001                         | 0.0282           |                            |
| GSE36476 CTRL VS TSST ACT 16H MEMORY CD4 TCELL YOUNG DN     | 194                 | 16 (8.2)                  | 16 (8.2)                    | 0 (0)                         | <0.0001 | <0.0001                         | 0.0281           | neu, dnc                   |
| GSE17721 0.5H VS 24H CPG BMDM UP                            | 195                 | 16 (8.2)                  | 16 (8.2)                    | 0 (0)                         | <0.0001 | <0.0001                         | 0.0280           | neu                        |
| GSE17721 0.5H VS 8H CPG BMDM DN                             | 195                 | 16 (8.2)                  | 16 (8.2)                    | 0 (0)                         | <0.0001 | <0.0001                         | 0.0280           | neu, mnc, dnc              |
| GSE17721 LPS VS POLYIC 8H BMDM DN                           | 195                 | 16 (8.2)                  | 16 (8.2)                    | 0 (0)                         | <0.0001 | <0.0001                         | 0.0280           | neu, mnc, dnc              |
| GSE24142 EARLY THYMIC PROGENITOR VS DN2 THYMOCYTE UP        | 196                 | 16 (8.2)                  | 16 (8.2)                    | 0 (0)                         | <0.0001 | <0.0001                         | 0.0280           | dnc                        |
| GSE360 L DONOVANI VS B MALAYI HIGH DOSE MAC DN              | 195                 | 16 (8.2)                  | 16 (8.2)                    | 0 (0)                         | <0.0001 | <0.0001                         | 0.0280           | neu, mnc, dnc,<br>tcl      |
| GSE22886 NEUTROPHIL VS DC UP                                | 198                 | 16 (8.1)                  | 15 (7.6)                    | 1 (0.5)                       | <0.0001 | <0.0001                         | 0.0279           | neu, mnc                   |
| GSE16522 MEMORY VS NAIVE ANTI CD3CD28 STIM CD8 TCELL DN     | 200                 | 16 (8)                    | 16 (8)                      | 0 (0)                         | <0.0001 | <0.0001                         | 0.0278           | neu, mnc, dnc,<br>tcl, bcl |
| GSE17721 0.5H VS 24H CPG BMDM DN                            | 199                 | 16 (8)                    | 15 (7.5)                    | 1 (0.5)                       | <0.0001 | <0.0001                         | 0.0278           | neu, dnc                   |
| GSE3982 DC VS NEUTROPHIL DN                                 | 207                 | 16 (7.7)                  | 15 (7.2)                    | 1 (0.5)                       | <0.0001 | <0.0001                         | 0.0274           | neu, mnc, dnc              |
| GSE11864 CSF1 VS CSF1 IFNG IN MAC DN                        | 184                 | 15 (8.2)                  | 15 (8.2)                    | 0 (0)                         | <0.0001 | <0.0001                         | 0.0267           | neu, mnc, dnc              |
| GSE3982 EOSINOPHIL VS BASOPHIL UP                           | 184                 | 15 (8.2)                  | 15 (8.2)                    | 0 (0)                         | <0.0001 | <0.0001                         | 0.0267           |                            |
| GSE360 L DONOVANI VS B MALAYI LOW DOSE DC UP                | 187                 | 15 (8)                    | 15 (8)                      | 0 (0)                         | <0.0001 | <0.0001                         | 0.0266           | neu, mnc, dnc              |
| GSE17721 POLYIC VS PAM3CSK4 1H BMDM DN                      | 190                 | 15 (7.9)                  | 13 (6.8)                    | 2 (1.1)                       | <0.0001 | <0.0001                         | 0.0265           |                            |
| GSE36392 TYPE 2 MYELOID VS EOSINOPHIL IL25 TREATED LUNG DN  | 191                 | 15 (7.9)                  | 15 (7.9)                    | 0 (0)                         | <0.0001 | <0.0001                         | 0.0264           | neu, mnc, dnc              |
| GSE17721 12H VS 24H GADIQUIMOD BMDM UP                      | 193                 | 15 (7.8)                  | 15 (7.8)                    | 0 (0)                         | <0.0001 | <0.0001                         | 0.0263           | neu, mnc, dnc              |
| GSE20366 EX VIVO VS DEC205 CONVERSION NAIVE CD4 TCELL UP    | 194                 | 15 (7.7)                  | 15 (7.7)                    | 0 (0)                         | <0.0001 | <0.0001                         | 0.0263           | neu, mnc, dnc,<br>bcl      |
| GSE3337 CTRL VS 16H IFNG IN CD8POS DC DN                    | 193                 | 15 (7.8)                  | 15 (7.8)                    | 0 (0)                         | <0.0001 | <0.0001                         | 0.0263           | neu, mnc, dnc,<br>tcl, bcl |
| GSE3982 MAST CELL VS CENT MEMORY CD4 TCELL UP               | 194                 | 15 (7.7)                  | 14 (7.2)                    | 1 (0.5)                       | <0.0001 | <0.0001                         | 0.0263           | mnc                        |
| GSE7460 TREG VS TCONV ACT UP                                | 194                 | 15 (7.7)                  | 15 (7.7)                    | 0 (0)                         | <0.0001 | <0.0001                         | 0.0263           | neu, mnc, dnc,<br>tcl, bcl |
| GSE7852 TREG VS TCONV THYMUS UP                             | 193                 | 15 (7.8)                  | 14 (7.3)                    | 1 (0.5)                       | <0.0001 | <0.0001                         | 0.0263           | neu, mnc, tcl              |

| Category Name                                               | Category Genes # | Any-reg. DE Genes #(%) | Up-reg. DE Genes #(%) | Down-reg. DE Genes #(%) | P-Value | FDR     | Jaccard Index | Cell Type Overlap       |
|-------------------------------------------------------------|------------------|------------------------|-----------------------|-------------------------|---------|---------|---------------|-------------------------|
| GSE2197 IMMUNOSUPPRESSIVE DNA VS UNTREATED IN DC UP         | 195              | 15 (7.7)               | 15 (7.7)              | 0 (0)                   | <0.0001 | <0.0001 | 0.0262        | neu, mnc, dnc, tcl      |
| GSE360 DC VS MAC T GONDII DN                                | 195              | 15 (7.7)               | 14 (7.2)              | 1 (0.5)                 | <0.0001 | <0.0001 | 0.0262        | mnc                     |
| GSE11864 CSF1 IFNG VS CSF1 PAM3CYS IN MAC UP                | 197              | 15 (7.6)               | 15 (7.6)              | 0 (0)                   | <0.0001 | <0.0001 | 0.0261        | neu, mnc, dnc, tcl, bcl |
| GSE17721 CTRL VS CPG 12H BMDM DN                            | 198              | 15 (7.6)               | 15 (7.6)              | 0 (0)                   | <0.0001 | <0.0001 | 0.0261        | neu, mnc                |
| GSE17721 LPS VS PAM3CSK4 8H BMDM UP                         | 198              | 15 (7.6)               | 15 (7.6)              | 0 (0)                   | <0.0001 | <0.0001 | 0.0261        | dnc                     |
| GSE17721 PAM3CSK4 VS CPG 12H BMDM DN                        | 197              | 15 (7.6)               | 15 (7.6)              | 0 (0)                   | <0.0001 | <0.0001 | 0.0261        | neu, mnc, dnc, bcl      |
| GSE3982 MAC VS CENT MEMORY CD4 TCELL UP                     | 198              | 15 (7.6)               | 15 (7.6)              | 0 (0)                   | <0.0001 | <0.0001 | 0.0261        |                         |
| GSE17721 0.5H VS 4H CPG BMDM DN                             | 200              | 15 (7.5)               | 15 (7.5)              | 0 (0)                   | <0.0001 | <0.0001 | 0.0260        | neu, mnc, dnc           |
| GSE17721 PAM3CSK4 VS GADIQUIMOD 12H BMDM DN                 | 200              | 15 (7.5)               | 15 (7.5)              | 0 (0)                   | <0.0001 | <0.0001 | 0.0260        | neu, mnc, dnc, tcl      |
| GSE7852 THYMUS VS FAT TREG DN                               | 203              | 15 (7.4)               | 14 (6.9)              | 1 (0.5)                 | <0.0001 | <0.0001 | 0.0259        | neu, mnc                |
| GSE10325 LUPUS CD4 TCELL VS LUPUS BCELL DN                  | 181              | 14 (7.7)               | 14 (7.7)              | 0 (0)                   | <0.0001 | <0.0001 | 0.0250        | neu                     |
| GSE37416 12H VS 24H F TULARENSIS LVS NEUTROPHIL UP          | 187              | 14 (7.5)               | 14 (7.5)              | 0 (0)                   | <0.0001 | <0.0001 | 0.0248        | neu                     |
| GSE37416 CTRL VS 48H F TULARENSIS LVS NEUTROPHIL UP         | 189              | 14 (7.4)               | 14 (7.4)              | 0 (0)                   | <0.0001 | <0.0001 | 0.0247        | neu, mnc, dnc, tcl      |
| GSE17580 UNINFECTED VS S MANSONI INF TEFF DN                | 190              | 14 (7.4)               | 14 (7.4)              | 0 (0)                   | <0.0001 | <0.0001 | 0.0246        | neu, mnc, tcl           |
| GSE17721 0.5H VS 4H POLYIC BMDM DN                          | 192              | 14 (7.3)               | 14 (7.3)              | 0 (0)                   | <0.0001 | <0.0001 | 0.0246        | neu, mnc, tcl           |
| GSE17721 CTRL VS LPS 1H BMDM DN                             | 191              | 14 (7.3)               | 14 (7.3)              | 0 (0)                   | <0.0001 | <0.0001 | 0.0246        | neu                     |
| GSE30962 ACUTE VS CHRONIC LCMV PRIMARY INF CD8 TCELL DN     | 190              | 14 (7.4)               | 14 (7.4)              | 0 (0)                   | <0.0001 | <0.0001 | 0.0246        | neu, mnc                |
| GSE360 CTRL VS L DONOVANI DC DN                             | 190              | 14 (7.4)               | 14 (7.4)              | 0 (0)                   | <0.0001 | <0.0001 | 0.0246        | neu, mnc                |
| GSE37416 0H VS 48H F TULARENSIS LVS NEUTROPHIL UP           | 190              | 14 (7.4)               | 14 (7.4)              | 0 (0)                   | <0.0001 | <0.0001 | 0.0246        | neu, mnc                |
| GSE9006 HEALTHY VS TYPE 2 DIABETES PBMC AT DX DN            | 190              | 14 (7.4)               | 13 (6.8)              | 1 (0.5)                 | <0.0001 | <0.0001 | 0.0246        |                         |
| GSE17721 CTRL VS PAM3CSK4 1H BMDM DN                        | 193              | 14 (7.3)               | 13 (6.7)              | 1 (0.5)                 | <0.0001 | <0.0001 | 0.0245        |                         |
| GSE17721 CTRL VS POLYIC 6H BMDM DN                          | 194              | 14 (7.2)               | 14 (7.2)              | 0 (0)                   | <0.0001 | <0.0001 | 0.0245        | neu, mnc, tcl, bcl      |
| GSE17721 LPS VS POLYIC 1H BMDM UP                           | 193              | 14 (7.3)               | 14 (7.3)              | 0 (0)                   | <0.0001 | <0.0001 | 0.0245        | neu, dnc                |
| GSE30083 SP1 VS SP3 THYMOCYTE UP                            | 194              | 14 (7.2)               | 14 (7.2)              | 0 (0)                   | <0.0001 | <0.0001 | 0.0245        | neu                     |
| GSE30083 SP3 VS SP4 THYMOCYTE DN                            | 194              | 14 (7.2)               | 13 (6.7)              | 1 (0.5)                 | <0.0001 | <0.0001 | 0.0245        | neu, tcl                |
| GSE30962 PRIMARY VS SECONDARY CHRONIC LCMV INF CD8 TCELL DN | 193              | 14 (7.3)               | 12 (6.2)              | 2 (1)                   | <0.0001 | <0.0001 | 0.0245        |                         |
| GSE9988 ANTI TREM1 VS LPS MONOCYTE UP                       | 193              | 14 (7.3)               | 13 (6.7)              | 1 (0.5)                 | <0.0001 | <0.0001 | 0.0245        | neu                     |
| GSE20366 TREG VS NAIVE CD4 TCELL DEC205 CONVERSION UP       | 196              | 14 (7.1)               | 14 (7.1)              | 0 (0)                   | <0.0001 | <0.0001 | 0.0244        | neu, mnc, dnc           |
| GSE3982 MAST CELL VS BCELL UP                               | 195              | 14 (7.2)               | 12 (6.2)              | 2 (1)                   | <0.0001 | <0.0001 | 0.0244        | mnc                     |
| GSE13484 UNSTIM VS 12H YF17D VACCINE STIM PBMC DN           | 199              | 14 (7)                 | 14 (7)                | 0 (0)                   | <0.0001 | <0.0001 | 0.0243        | neu, mnc, dnc           |

Appendix "PBMC response to AS03-H5N1 vaccine"

Howard, Goll et al.

| Category Name                                              | Category<br>Genes # | Any-reg. DE<br>Genes #(%) | Up-reg.<br>DE Genes<br>#(%) | Down-reg.<br>DE Genes<br>#(%) | P-Value | FDR<br>Ad-<br>justed<br>P-Value | Jaccard<br>Index | Cell Type Over-<br>lap  |
|------------------------------------------------------------|---------------------|---------------------------|-----------------------------|-------------------------------|---------|---------------------------------|------------------|-------------------------|
| GSE17721 12H VS 24H PAM3CSK4 BMDM UP                       | 197                 | 14 (7.1)                  | 14 (7.1)                    | 0 (0)                         | <0.0001 | <0.0001                         | 0.0243           | tcl                     |
| GSE17721 CPG VS GARDIQUIMOD 12H BMDM DN                    | 199                 | 14 (7)                    | 13 (6.5)                    | 1 (0.5)                       | <0.0001 | <0.0001                         | 0.0243           |                         |
| GSE17721 POLYIC VS GARDIQUIMOD 16H BMDM UP                 | 198                 | 14 (7.1)                  | 14 (7.1)                    | 0 (0)                         | <0.0001 | <0.0001                         | 0.0243           | mnc                     |
| GSE9988 ANTI TREM1 AND LPS VS VEHICLE TREATED MONOCYTES DN | 199                 | 14 (7)                    | 14 (7)                      | 0 (0)                         | <0.0001 | <0.0001                         | 0.0243           |                         |
| GSE17721 POLYIC VS CPG 1H BMDM DN                          | 200                 | 14 (7)                    | 14 (7)                      | 0 (0)                         | <0.0001 | <0.0001                         | 0.0242           |                         |
| GSE30083 SP1 VS SP4 THYMOCYTE DN                           | 201                 | 14 (7)                    | 14 (7)                      | 0 (0)                         | <0.0001 | <0.0001                         | 0.0242           | neu, mnc, dnc, tcl      |
| GSE9037 CTRL VS LPS 4H STIM IRAK4 KO BMDM DN               | 200                 | 14 (7)                    | 14 (7)                      | 0 (0)                         | <0.0001 | <0.0001                         | 0.0242           | neu, mnc, dnc           |
| GSE3982 MAST CELL VS MAC DN                                | 204                 | 14 (6.9)                  | 14 (6.9)                    | 0 (0)                         | <0.0001 | <0.0001                         | 0.0241           |                         |
| GSE9988 ANTI TREM1 AND LPS VS CTRL TREATED MONOCYTES UP    | 181                 | 13 (7.2)                  | 12 (6.6)                    | 1 (0.6)                       | <0.0001 | <0.0001                         | 0.0232           |                         |
| GSE17721 CPG VS GARDIQUIMOD 2H BMDM DN                     | 191                 | 13 (6.8)                  | 13 (6.8)                    | 0 (0)                         | <0.0001 | <0.0001                         | 0.0228           |                         |
| GSE30083 SP1 VS SP2 THYMOCYTE UP                           | 192                 | 13 (6.8)                  | 13 (6.8)                    | 0 (0)                         | <0.0001 | <0.0001                         | 0.0228           |                         |
| GSE37416 0H VS 6H F TULARENSIS LVS NEUTROPHIL UP           | 191                 | 13 (6.8)                  | 12 (6.3)                    | 1 (0.5)                       | <0.0001 | <0.0001                         | 0.0228           |                         |
| GSE3982 BCELL VS NKCELL DN                                 | 190                 | 13 (6.8)                  | 12 (6.3)                    | 1 (0.5)                       | <0.0001 | <0.0001                         | 0.0228           | mnc                     |
| GSE3982 NEUTROPHIL VS BASOPHIL UP                          | 191                 | 13 (6.8)                  | 13 (6.8)                    | 0 (0)                         | <0.0001 | <0.0001                         | 0.0228           | neu, mnc                |
| GSE9988 LOW LPS VS ANTI TREM1 AND LPS MONOCYTE DN          | 190                 | 13 (6.8)                  | 12 (6.3)                    | 1 (0.5)                       | <0.0001 | <0.0001                         | 0.0228           |                         |
| GSE1448 CTRL VS ANTI VBETA5 DP THYMOCYTE DN                | 194                 | 13 (6.7)                  | 13 (6.7)                    | 0 (0)                         | <0.0001 | <0.0001                         | 0.0227           | neu, mnc, dnc, tcl, bcl |
| GSE17721 LPS VS GARDIQUIMOD 24H BMDM DN                    | 194                 | 13 (6.7)                  | 12 (6.2)                    | 1 (0.5)                       | <0.0001 | <0.0001                         | 0.0227           |                         |
| GSE17721 PAM3CSK4 VS CPG 2H BMDM DN                        | 193                 | 13 (6.7)                  | 13 (6.7)                    | 0 (0)                         | <0.0001 | <0.0001                         | 0.0227           | neu                     |
| GSE3982 MAST CELL VS TH1 UP                                | 193                 | 13 (6.7)                  | 12 (6.2)                    | 1 (0.5)                       | <0.0001 | <0.0001                         | 0.0227           |                         |
| GSE9988 ANTI TREM1 VS LOW LPS MONOCYTE UP                  | 194                 | 13 (6.7)                  | 13 (6.7)                    | 0 (0)                         | <0.0001 | <0.0001                         | 0.0227           |                         |
| GSE17721 CPG VS GARDIQUIMOD 4H BMDM UP                     | 197                 | 13 (6.6)                  | 12 (6.1)                    | 1 (0.5)                       | <0.0001 | <0.0001                         | 0.0226           | neu, dnc                |
| GSE17721 CTRL VS GARDIQUIMOD 4H BMDM DN                    | 197                 | 13 (6.6)                  | 13 (6.6)                    | 0 (0)                         | <0.0001 | <0.0001                         | 0.0226           | mnc, dnc                |
| GSE2826 XID VS BTK KO BCELL DN                             | 195                 | 13 (6.7)                  | 13 (6.7)                    | 0 (0)                         | <0.0001 | <0.0001                         | 0.0226           | neu, mnc, dnc           |
| GSE39820 IL1B IL6 VS IL1B IL6 IL23A TREATED CD4 TCELL UP   | 196                 | 13 (6.6)                  | 13 (6.6)                    | 0 (0)                         | <0.0001 | <0.0001                         | 0.0226           | neu, mnc, tcl, nkc      |
| GSE3982 MAST CELL VS NEUTROPHIL DN                         | 197                 | 13 (6.6)                  | 13 (6.6)                    | 0 (0)                         | <0.0001 | <0.0001                         | 0.0226           | neu, mnc, dnc           |
| GSE7764 IL15 TREATED VS CTRL NK CELL 24H DN                | 196                 | 13 (6.6)                  | 12 (6.1)                    | 1 (0.5)                       | <0.0001 | <0.0001                         | 0.0226           | neu                     |
| GSE17721 0.5H VS 12H CPG BMDM DN                           | 199                 | 13 (6.5)                  | 12 (6)                      | 1 (0.5)                       | <0.0001 | <0.0001                         | 0.0225           | neu                     |
| GSE17721 POLYIC VS GARDIQUIMOD 2H BMDM DN                  | 198                 | 13 (6.6)                  | 12 (6.1)                    | 1 (0.5)                       | <0.0001 | <0.0001                         | 0.0225           |                         |
| GSE26669 CTRL VS COSTIM BLOCK MLR CD8 TCELL UP             | 199                 | 13 (6.5)                  | 13 (6.5)                    | 0 (0)                         | <0.0001 | <0.0001                         | 0.0225           | neu, mnc, tcl           |
| GSE17974 CTRL VS ACT IL4 AND ANTI IL12 0.5H CD4 TCELL UP   | 171                 | 12 (7)                    | 12 (7)                      | 0 (0)                         | <0.0001 | <0.0001                         | 0.0218           |                         |
| GSE360 DC VS MAC DN                                        | 184                 | 12 (6.5)                  | 12 (6.5)                    | 0 (0)                         | <0.0001 | <0.0001                         | 0.0213           | neu                     |
| GSE3982 BCELL VS CENT MEMORY CD4 TCELL UP                  | 188                 | 12 (6.4)                  | 11 (5.9)                    | 1 (0.5)                       | <0.0001 | <0.0001                         | 0.0211           | neu, mnc                |
| GOLDRATH NAIVE VS EFF CD8 TCELL DN                         | 192                 | 12 (6.2)                  | 12 (6.2)                    | 0 (0)                         | <0.0001 | <0.0001                         | 0.0210           | neu                     |

| Category Name                                              | Category<br>Genes # | Any-reg. DE<br>Genes #(%) | Up-reg.<br>DE Genes<br>#(%) | Down-reg.<br>DE Genes<br>#(%) | P-Value | FDR<br>Ad-<br>justed<br>P-Value | Jaccard<br>Index | Cell Type Over-<br>lap     |
|------------------------------------------------------------|---------------------|---------------------------|-----------------------------|-------------------------------|---------|---------------------------------|------------------|----------------------------|
| GSE27786 LIN NEG VS ERYTHROBLAST UP                        | 195                 | 12 (6.2)                  | 12 (6.2)                    | 0 (0)                         | <0.0001 | <0.0001                         | 0.0209           | mnc, dnc, nkc              |
| GSE36392 EOSINOPHIL VS NEUTROPHIL IL25 TREATED LUNG UP     | 193                 | 14 (7.3)                  | 13 (6.7)                    | 1 (0.5)                       | <0.0001 | 0.0001                          | 0.0245           | mnc                        |
| GSE3982 DC VS NEUTROPHIL LPS STIM DN                       | 188                 | 13 (6.9)                  | 13 (6.9)                    | 0 (0)                         | <0.0001 | 0.0001                          | 0.0229           |                            |
| GSE20715 0H VS 6H OZONE LUNG DN                            | 192                 | 13 (6.8)                  | 12 (6.2)                    | 1 (0.5)                       | <0.0001 | 0.0001                          | 0.0228           | neu                        |
| GSE25087 FETAL VS ADULT TREG UP                            | 190                 | 13 (6.8)                  | 13 (6.8)                    | 0 (0)                         | <0.0001 | 0.0001                          | 0.0228           | neu, mnc, nkc              |
| GSE37416 12H VS 48H F TULARENSIS LVS NEUTROPHIL UP         | 192                 | 13 (6.8)                  | 13 (6.8)                    | 0 (0)                         | <0.0001 | 0.0001                          | 0.0228           |                            |
| GSE7460 FOXP3 MUT VS WT ACT TCONV UP                       | 191                 | 13 (6.8)                  | 13 (6.8)                    | 0 (0)                         | <0.0001 | 0.0001                          | 0.0228           | neu, mnc                   |
| GSE8868 SPLEEN VS INTESTINE CD11B POS CD11C NEG DC DN      | 191                 | 13 (6.8)                  | 13 (6.8)                    | 0 (0)                         | <0.0001 | 0.0001                          | 0.0228           | neu                        |
| GSE13306 RA VS UNTREATED MEM CD4 TCELL UP                  | 194                 | 13 (6.7)                  | 13 (6.7)                    | 0 (0)                         | <0.0001 | 0.0001                          | 0.0227           | neu, mnc, dnc              |
| GSE17721 LPS VS CPG 16H BMDM UP                            | 194                 | 13 (6.7)                  | 13 (6.7)                    | 0 (0)                         | <0.0001 | 0.0001                          | 0.0227           | neu, mnc, dnc              |
| GSE17721 LPS VS POLYIC 24H BMDM DN                         | 194                 | 13 (6.7)                  | 12 (6.2)                    | 1 (0.5)                       | <0.0001 | 0.0001                          | 0.0227           | neu                        |
| GSE360 L MAJOR VS B MALAYI HIGH DOSE MAC UP                | 193                 | 13 (6.7)                  | 13 (6.7)                    | 0 (0)                         | <0.0001 | 0.0001                          | 0.0227           |                            |
| GSE17721 CTRL VS POLYIC 2H BMDM DN                         | 200                 | 13 (6.5)                  | 11 (5.5)                    | 2 (1)                         | <0.0001 | 0.0001                          | 0.0225           |                            |
| GSE17721 LPS VS POLYIC 12H BMDM DN                         | 199                 | 13 (6.5)                  | 11 (5.5)                    | 2 (1)                         | <0.0001 | 0.0001                          | 0.0225           | neu, mnc, dnc              |
| GSE20715 0H VS 24H OZONE LUNG DN                           | 199                 | 13 (6.5)                  | 13 (6.5)                    | 0 (0)                         | <0.0001 | 0.0001                          | 0.0225           | neu                        |
| GSE37416 0H VS 12H F TULARENSIS LVS NEUTROPHIL UP          | 205                 | 13 (6.3)                  | 13 (6.3)                    | 0 (0)                         | <0.0001 | 0.0001                          | 0.0223           | neu                        |
| GSE18791 CTRL VS NEWCASTLE VIRUS DC 2H DN                  | 178                 | 12 (6.7)                  | 12 (6.7)                    | 0 (0)                         | <0.0001 | 0.0001                          | 0.0215           | neu, mnc, dnc              |
| GSE2706 R848 VS R848 AND LPS 8H STIM DC DN                 | 183                 | 12 (6.6)                  | 10 (5.5)                    | 2 (1.1)                       | <0.0001 | 0.0001                          | 0.0213           | dnc                        |
| GSE7460 WT VS FOXP3 HET ACT WITH TGFB TCONV DN             | 184                 | 12 (6.5)                  | 12 (6.5)                    | 0 (0)                         | <0.0001 | 0.0001                          | 0.0213           | mnc                        |
| GSE11864 CSF1 VS CSF1 PAM3CYS IN MAC DN                    | 187                 | 12 (6.4)                  | 12 (6.4)                    | 0 (0)                         | <0.0001 | 0.0001                          | 0.0212           | neu                        |
| GSE24634 TEFF VS TCONV DAY5 IN CULTURE DN                  | 185                 | 12 (6.5)                  | 12 (6.5)                    | 0 (0)                         | <0.0001 | 0.0001                          | 0.0212           | neu, mnc, dnc,<br>tcl, nkc |
| GSE360 DC VS MAC L DONOVANI DN                             | 188                 | 12 (6.4)                  | 12 (6.4)                    | 0 (0)                         | <0.0001 | 0.0001                          | 0.0211           | neu                        |
| GSE3982 BCELL VS TH1 DN                                    | 188                 | 12 (6.4)                  | 10 (5.3)                    | 2 (1.1)                       | <0.0001 | 0.0001                          | 0.0211           | neu, mnc                   |
| GOLDRATH EFF VS MEMORY CD8 TCELL UP                        | 192                 | 12 (6.2)                  | 12 (6.2)                    | 0 (0)                         | <0.0001 | 0.0001                          | 0.0210           |                            |
| KAECH DAY15 EFF VS MEMORY CD8 TCELL UP                     | 195                 | 12 (6.2)                  | 12 (6.2)                    | 0 (0)                         | <0.0001 | 0.0001                          | 0.0209           | neu, mnc                   |
| GSE17721 LPS VS PAM3CSK4 16H BMDM UP                       | 198                 | 12 (6.1)                  | 12 (6.1)                    | 0 (0)                         | <0.0001 | 0.0001                          | 0.0208           | mnc, dnc                   |
| GSE17721 LPS VS CPG 24H BMDM UP                            | 200                 | 12 (6)                    | 12 (6)                      | 0 (0)                         | <0.0001 | 0.0001                          | 0.0207           | neu, mnc, dnc,<br>tcl, bcl |
| GSE17721 PAM3CSK4 VS GADIQUIMOD 24H BMDM DN                | 199                 | 12 (6)                    | 12 (6)                      | 0 (0)                         | <0.0001 | 0.0001                          | 0.0207           | neu, mnc, dnc              |
| GSE6566 STRONG VS WEAK DC STIMULATED CD4 TCELL UP          | 177                 | 11 (6.2)                  | 11 (6.2)                    | 0 (0)                         | <0.0001 | 0.0001                          | 0.0197           | neu, mnc, dnc              |
| GSE9988 ANTI TREM1 AND LPS VS VEHICLE TREATED MONOCYTES UP | 181                 | 11 (6.1)                  | 10 (5.5)                    | 1 (0.6)                       | <0.0001 | 0.0001                          | 0.0196           |                            |
| GSE17721 PAM3CSK4 VS GADIQUIMOD 1H BMDM UP                 | 190                 | 13 (6.8)                  | 11 (5.8)                    | 2 (1.1)                       | <0.0001 | 0.0002                          | 0.0228           |                            |
| GSE3982 MAC VS TH1 UP                                      | 193                 | 13 (6.7)                  | 12 (6.2)                    | 1 (0.5)                       | <0.0001 | 0.0002                          | 0.0227           |                            |
| GSE17721 0.5H VS 12H POLYIC BMDM DN                        | 196                 | 13 (6.6)                  | 13 (6.6)                    | 0 (0)                         | <0.0001 | 0.0002                          | 0.0226           | tcl, bcl                   |
| GSE17721 LPS VS CPG 12H BMDM UP                            | 197                 | 13 (6.6)                  | 13 (6.6)                    | 0 (0)                         | <0.0001 | 0.0002                          | 0.0226           | neu, mnc, dnc              |

| Category Name                                                 | Category<br>Genes # | Any-reg. DE<br>Genes #(%) | Up-reg.<br>DE Genes<br>#(%) | Down-reg.<br>DE Genes<br>#(%) | P-Value | FDR<br>Ad-<br>justed<br>P-Value | Jaccard<br>Index | Cell Type Over-<br>lap |
|---------------------------------------------------------------|---------------------|---------------------------|-----------------------------|-------------------------------|---------|---------------------------------|------------------|------------------------|
| GSE17721 LPS VS CPG 4H BMDM UP                                | 197                 | 13 (6.6)                  | 13 (6.6)                    | 0 (0)                         | <0.0001 | 0.0002                          | 0.0226           | neu, tcl, bcl          |
| GSE17721 CTRL VS GARDIQUIMOD 12H BMDM DN                      | 199                 | 13 (6.5)                  | 12 (6)                      | 1 (0.5)                       | <0.0001 | 0.0002                          | 0.0225           | neu                    |
| GSE3982 MAC VS NEUTROPHIL DN                                  | 186                 | 12 (6.5)                  | 12 (6.5)                    | 0 (0)                         | <0.0001 | 0.0002                          | 0.0212           | mnc                    |
| GSE11864 CSF1 VS CSF1 IFNG PAM3CYS IN MAC DN                  | 188                 | 12 (6.4)                  | 11 (5.9)                    | 1 (0.5)                       | <0.0001 | 0.0002                          | 0.0211           | neu, nkc               |
| GSE17974 0H VS 0.5H IN VITRO ACT CD4 TCELL UP                 | 189                 | 12 (6.3)                  | 12 (6.3)                    | 0 (0)                         | <0.0001 | 0.0002                          | 0.0211           | neu, mnc               |
| GSE360 L DONOVANI VS L MAJOR DC DN                            | 191                 | 12 (6.3)                  | 11 (5.8)                    | 1 (0.5)                       | <0.0001 | 0.0002                          | 0.0210           | neu                    |
| GSE3982 CENT MEMORY CD4 TCELL VS NKCELL DN                    | 191                 | 12 (6.3)                  | 12 (6.3)                    | 0 (0)                         | <0.0001 | 0.0002                          | 0.0210           |                        |
| GOLDRATH NAIVE VS MEMORY CD8 TCELL DN                         | 193                 | 12 (6.2)                  | 12 (6.2)                    | 0 (0)                         | <0.0001 | 0.0002                          | 0.0209           |                        |
| GSE17721 LPS VS POLYIC 2H BMDM UP                             | 194                 | 12 (6.2)                  | 12 (6.2)                    | 0 (0)                         | <0.0001 | 0.0002                          | 0.0209           | mnc                    |
| GSE360 T GONDII VS B MALAYI HIGH DOSE MAC DN                  | 194                 | 12 (6.2)                  | 12 (6.2)                    | 0 (0)                         | <0.0001 | 0.0002                          | 0.0209           | neu, mnc, dnc          |
| GSE36476 CTRL VS TSST ACT 16H MEMORY CD4 TCELL OLD DN         | 196                 | 12 (6.1)                  | 12 (6.1)                    | 0 (0)                         | <0.0001 | 0.0002                          | 0.0208           | neu, dnc               |
| GSE7460 CTRL VS TGFB TREATED ACT TCONV DN                     | 197                 | 12 (6.1)                  | 12 (6.1)                    | 0 (0)                         | <0.0001 | 0.0002                          | 0.0208           | neu, mnc               |
| GSE9988 LPS VS LPS AND ANTI TREM1 MONOCYTE DN                 | 184                 | 12 (6.5)                  | 11 (6)                      | 1 (0.5)                       | <0.0001 | 0.0002                          | 0.0213           |                        |
| GSE12366 GC BCELL VS PLASMA CELL DN                           | 185                 | 12 (6.5)                  | 10 (5.4)                    | 2 (1.1)                       | <0.0001 | 0.0002                          | 0.0212           |                        |
| GSE12366 GC VS NAIVE BCELL DN                                 | 190                 | 12 (6.3)                  | 11 (5.8)                    | 1 (0.5)                       | <0.0001 | 0.0002                          | 0.0211           | neu, mnc, dnc,<br>tcl  |
| GSE24142 ADULT VS FETAL DN3 THYMOCYTE UP                      | 189                 | 12 (6.3)                  | 12 (6.3)                    | 0 (0)                         | <0.0001 | 0.0002                          | 0.0211           | neu, mnc, tcl          |
| GSE17721 POLYIC VS PAM3CSK4 4H BMDM UP                        | 193                 | 12 (6.2)                  | 12 (6.2)                    | 0 (0)                         | <0.0001 | 0.0002                          | 0.0209           | neu                    |
| GSE20715 0H VS 48H OZONE LUNG UP                              | 193                 | 12 (6.2)                  | 12 (6.2)                    | 0 (0)                         | <0.0001 | 0.0002                          | 0.0209           |                        |
| GSE24142 ADULT VS FETAL EARLY THYMIC PROGENITOR UP            | 193                 | 12 (6.2)                  | 10 (5.2)                    | 2 (1)                         | <0.0001 | 0.0002                          | 0.0209           |                        |
| GSE24142 DN2 VS DN3 THYMOCYTE FETAL UP                        | 195                 | 12 (6.2)                  | 12 (6.2)                    | 0 (0)                         | <0.0001 | 0.0002                          | 0.0209           |                        |
| GSE29618 BCELL VS PDC DAY7 FLU VACCINE DN                     | 194                 | 12 (6.2)                  | 12 (6.2)                    | 0 (0)                         | <0.0001 | 0.0002                          | 0.0209           | neu, mnc               |
| GSE3982 MAST CELL VS TH2 UP                                   | 193                 | 12 (6.2)                  | 11 (5.7)                    | 1 (0.5)                       | <0.0001 | 0.0002                          | 0.0209           |                        |
| GSE7460 TCONV VS TREG THYMUS DN                               | 195                 | 12 (6.2)                  | 12 (6.2)                    | 0 (0)                         | <0.0001 | 0.0002                          | 0.0209           | neu, mnc, dnc,<br>tcl  |
| GSE17721 LPS VS CPG 24H BMDM DN                               | 197                 | 12 (6.1)                  | 11 (5.6)                    | 1 (0.5)                       | <0.0001 | 0.0002                          | 0.0208           |                        |
| GSE24102 GRANULOCYSTIC MDSC VS NEUTROPHIL DN                  | 196                 | 12 (6.1)                  | 11 (5.6)                    | 1 (0.5)                       | <0.0001 | 0.0002                          | 0.0208           |                        |
| GSE24142 DN2 VS DN3 THYMOCYTE UP                              | 197                 | 12 (6.1)                  | 12 (6.1)                    | 0 (0)                         | <0.0001 | 0.0002                          | 0.0208           | neu                    |
| GSE24142 EARLY THYMIC PROGENITOR VS DN3 THYMOCYTE<br>ADULT UP | 197                 | 12 (6.1)                  | 11 (5.6)                    | 1 (0.5)                       | <0.0001 | 0.0002                          | 0.0208           |                        |
| GSE17721 CTRL VS GARDIQUIMOD 8H BMDM DN                       | 199                 | 12 (6)                    | 11 (5.5)                    | 1 (0.5)                       | <0.0001 | 0.0002                          | 0.0207           | neu                    |
| GSE17721 CTRL VS PAM3CSK4 12H BMDM DN                         | 201                 | 12 (6)                    | 12 (6)                      | 0 (0)                         | <0.0001 | 0.0002                          | 0.0207           | neu                    |
| GSE7852 LN VS FAT TREG DN                                     | 201                 | 12 (6)                    | 12 (6)                      | 0 (0)                         | <0.0001 | 0.0002                          | 0.0207           | neu                    |
| GSE15930 STIM VS STIM AND TRICHOSTATINA 72H CD8 T CELL DN     | 202                 | 12 (5.9)                  | 10 (5)                      | 2 (1)                         | <0.0001 | 0.0002                          | 0.0206           | neu, mnc               |
| GSE17721 POLYIC VS CPG 2H BMDM DN                             | 202                 | 12 (5.9)                  | 11 (5.4)                    | 1 (0.5)                       | <0.0001 | 0.0002                          | 0.0206           |                        |
| GSE17721 CTRL VS CPG 2H BMDM DN                               | 196                 | 12 (6.1)                  | 10 (5.1)                    | 2 (1)                         | <0.0001 | 0.0003                          | 0.0208           |                        |
| GSE17721 LPS VS PAM3CSK4 12H BMDM UP                          | 196                 | 12 (6.1)                  | 12 (6.1)                    | 0 (0)                         | <0.0001 | 0.0003                          | 0.0208           | neu, mnc, dnc          |

| Category Name                                              | Category<br>Genes # | Any-reg. DE<br>Genes #(%) | Up-reg.<br>DE Genes<br>#(%) | Down-reg.<br>DE Genes<br>#(%) | P-Value | FDR<br>Ad-<br>justed<br>P-Value | Jaccard<br>Index | Cell Type Over-<br>lap |
|------------------------------------------------------------|---------------------|---------------------------|-----------------------------|-------------------------------|---------|---------------------------------|------------------|------------------------|
| GSE1460 CD4 THYMOCYTE VS NAIVE CD4 TCELL ADULT BLOOD UP    | 200                 | 12 (6)                    | 11 (5.5)                    | 1 (0.5)                       | <0.0001 | 0.0003                          | 0.0207           | tcl                    |
| GSE24142 DN2 VS DN3 THYMOCYTE ADULT UP                     | 199                 | 12 (6)                    | 12 (6)                      | 0 (0)                         | <0.0001 | 0.0003                          | 0.0207           | neu, mnc, tcl          |
| GSE9006 TYPE 1 DIABETES AT DX VS 1MONTH POST DX PBMC UP    | 191                 | 11 (5.8)                  | 11 (5.8)                    | 0 (0)                         | <0.0001 | 0.0003                          | 0.0192           |                        |
| GSE36392 TYPE 2 MYELOID VS NEUTROPHIL IL25 TREATED LUNG UP | 194                 | 12 (6.2)                  | 12 (6.2)                    | 0 (0)                         | <0.0001 | 0.0003                          | 0.0209           | mnc                    |
| GSE17721 CTRL VS CPG 4H BMDM DN                            | 197                 | 12 (6.1)                  | 11 (5.6)                    | 1 (0.5)                       | <0.0001 | 0.0003                          | 0.0208           | neu, mnc               |
| GSE7460 CD8 TCELL VS TREG ACT UP                           | 197                 | 12 (6.1)                  | 11 (5.6)                    | 1 (0.5)                       | <0.0001 | 0.0003                          | 0.0208           |                        |
| GSE17721 0.5H VS 12H LPS BMDM DN                           | 194                 | 11 (5.7)                  | 11 (5.7)                    | 0 (0)                         | <0.0001 | 0.0003                          | 0.0191           | neu, mnc               |
| GSE27786 NKCELL VS NKTCELL UP                              | 198                 | 12 (6.1)                  | 11 (5.6)                    | 1 (0.5)                       | <0.0001 | 0.0004                          | 0.0208           | neu                    |
| GSE13484 12H VS 3H YF17D VACCINE STIM PBMC UP              | 196                 | 11 (5.6)                  | 11 (5.6)                    | 0 (0)                         | <0.0001 | 0.0004                          | 0.0191           |                        |
| GSE3337 CTRL VS 16H IFNG IN CD8POS DC UP                   | 198                 | 12 (6.1)                  | 11 (5.6)                    | 1 (0.5)                       | <0.0001 | 0.0004                          | 0.0208           |                        |
| GSE2706 2H VS 8H R848 STIM DC UP                           | 189                 | 11 (5.8)                  | 11 (5.8)                    | 0 (0)                         | <0.0001 | 0.0004                          | 0.0193           | neu                    |
| GSE17721 LPS VS CPG 2H BMDM UP                             | 191                 | 11 (5.8)                  | 9 (4.7)                     | 2 (1)                         | <0.0001 | 0.0004                          | 0.0192           | neu                    |
| GSE9037 WT VS IRAK4 KO BMDM DN                             | 196                 | 11 (5.6)                  | 10 (5.1)                    | 1 (0.5)                       | <0.0001 | 0.0004                          | 0.0191           | dnc                    |
| GSE17721 0.5H VS 24H LPS BMDM DN                           | 197                 | 11 (5.6)                  | 8 (4.1)                     | 3 (1.5)                       | <0.0001 | 0.0004                          | 0.0190           |                        |
| GSE3982 MAC VS TH2 UP                                      | 187                 | 11 (5.9)                  | 10 (5.3)                    | 1 (0.5)                       | <0.0001 | 0.0005                          | 0.0194           |                        |
| GSE8515 CTRL VS IL1 4H STIM MAC DN                         | 185                 | 11 (5.9)                  | 11 (5.9)                    | 0 (0)                         | <0.0001 | 0.0005                          | 0.0194           |                        |
| GSE8384 CTRL VS B ABORTUS 4H MAC CELL LINE DN              | 190                 | 11 (5.8)                  | 10 (5.3)                    | 1 (0.5)                       | <0.0001 | 0.0005                          | 0.0193           |                        |
| GSE37416 0H VS 24H F TULARENSIS LVS NEUTROPHIL UP          | 191                 | 11 (5.8)                  | 11 (5.8)                    | 0 (0)                         | <0.0001 | 0.0005                          | 0.0192           |                        |
| GSE9988 ANTI TREM1 VS VEHICLE TREATED MONOCYTES UP         | 180                 | 11 (6.1)                  | 11 (6.1)                    | 0 (0)                         | <0.0001 | 0.0005                          | 0.0196           |                        |
| GSE17721 LPS VS CPG 8H BMDM DN                             | 187                 | 11 (5.9)                  | 11 (5.9)                    | 0 (0)                         | <0.0001 | 0.0005                          | 0.0194           |                        |
| GSE360 L DONOVANI VS B MALAYI HIGH DOSE DC DN              | 187                 | 11 (5.9)                  | 10 (5.3)                    | 1 (0.5)                       | <0.0001 | 0.0005                          | 0.0194           |                        |
| GSE20366 CD103 POS VS CD103 KLRG1 DP TREG DN               | 190                 | 11 (5.8)                  | 10 (5.3)                    | 1 (0.5)                       | <0.0001 | 0.0005                          | 0.0193           |                        |
| GSE22886 NAIVE VS IGM MEMORY BCELL DN                      | 193                 | 11 (5.7)                  | 11 (5.7)                    | 0 (0)                         | <0.0001 | 0.0005                          | 0.0192           | neu, mnc, dnc          |
| GSE27786 CD4 TCELL VS NKCELL DN                            | 192                 | 11 (5.7)                  | 10 (5.2)                    | 1 (0.5)                       | <0.0001 | 0.0005                          | 0.0192           | neu                    |
| KAECH NAIVE VS MEMORY CD8 TCELL DN                         | 195                 | 11 (5.6)                  | 11 (5.6)                    | 0 (0)                         | <0.0001 | 0.0005                          | 0.0191           | dnc                    |
| GSE3982 MEMORY CD4 TCELL VS TH1 DN                         | 199                 | 11 (5.5)                  | 10 (5)                      | 1 (0.5)                       | <0.0001 | 0.0005                          | 0.0190           | neu, mnc               |
| GSE36392 EOSINOPHIL VS MAC IL25 TREATED LUNG UP            | 190                 | 11 (5.8)                  | 11 (5.8)                    | 0 (0)                         | 0.0001  | 0.0006                          | 0.0193           |                        |
| GSE9037 CTRL VS LPS 1H STIM IRAK4 KO BMDM DN               | 189                 | 11 (5.8)                  | 11 (5.8)                    | 0 (0)                         | 0.0001  | 0.0006                          | 0.0193           | neu, mnc, dnc, nkc     |
| GSE17721 PAM3CSK4 VS CPG 16H BMDM DN                       | 191                 | 11 (5.8)                  | 11 (5.8)                    | 0 (0)                         | 0.0001  | 0.0006                          | 0.0192           | neu, tcl, bcl          |
| GSE17721 LPS VS PAM3CSK4 4H BMDM UP                        | 194                 | 11 (5.7)                  | 11 (5.7)                    | 0 (0)                         | 0.0001  | 0.0006                          | 0.0191           | neu                    |
| GSE27786 CD4 VS CD8 TCELL UP                               | 194                 | 11 (5.7)                  | 11 (5.7)                    | 0 (0)                         | 0.0001  | 0.0006                          | 0.0191           | neu                    |
| GSE3982 MAC VS BASOPHIL UP                                 | 194                 | 11 (5.7)                  | 11 (5.7)                    | 0 (0)                         | 0.0001  | 0.0006                          | 0.0191           |                        |
| GSE17721 CTRL VS CPG 6H BMDM DN                            | 197                 | 11 (5.6)                  | 10 (5.1)                    | 1 (0.5)                       | 0.0001  | 0.0006                          | 0.0190           | neu                    |
| GSE17974 CTRL VS ACT IL4 AND ANTI IL12 1H CD4 TCELL UP     | 185                 | 11 (5.9)                  | 11 (5.9)                    | 0 (0)                         | 0.0001  | 0.0006                          | 0.0194           | tcl                    |
| GSE360 L MAJOR VS B MALAYI LOW DOSE DC UP                  | 190                 | 11 (5.8)                  | 11 (5.8)                    | 0 (0)                         | 0.0001  | 0.0006                          | 0.0193           | neu, mnc, dnc          |

Appendix "PBMC response to AS03-H5N1 vaccine"

Howard, Goll et al.

| Category Name                                                   | Category<br>Genes # | Any-reg. DE<br>Genes #(%) | Up-reg.<br>DE Genes<br>#(%) | Down-reg.<br>DE Genes<br>#(%) | P-Value | FDR    | Jaccard<br>Index | Cell Type Over-<br>lap |
|-----------------------------------------------------------------|---------------------|---------------------------|-----------------------------|-------------------------------|---------|--------|------------------|------------------------|
| GSE15930 NAIVE VS 24H IN VITRO STIM CD8 TCELL UP                | 192                 | 11 (5.7)                  | 10 (5.2)                    | 1 (0.5)                       | 0.0001  | 0.0006 | 0.0192           |                        |
| GSE24142 EARLY THYMIC PROGENITOR VS DN3 THYMOCYTE FE-<br>TAL UP | 192                 | 11 (5.7)                  | 11 (5.7)                    | 0 (0)                         | 0.0001  | 0.0006 | 0.0192           | neu                    |
| GSE17721 POLYIC VS CPG 24H BMDM UP                              | 196                 | 11 (5.6)                  | 10 (5.1)                    | 1 (0.5)                       | 0.0001  | 0.0006 | 0.0191           | neu, dnc               |
| GSE32423 CTRL VS IL4 MEMORY CD8 TCELL DN                        | 194                 | 11 (5.7)                  | 11 (5.7)                    | 0 (0)                         | 0.0001  | 0.0006 | 0.0191           | neu, dnc, tcl          |
| GSE17974 CTRL VS ACT IL4 AND ANTI IL12 2H CD4 TCELL DN          | 190                 | 11 (5.8)                  | 10 (5.3)                    | 1 (0.5)                       | 0.0001  | 0.0006 | 0.0193           | neu                    |
| GSE17721 12H VS 24H POLYIC BMDM UP                              | 193                 | 11 (5.7)                  | 11 (5.7)                    | 0 (0)                         | 0.0001  | 0.0006 | 0.0192           | neu                    |
| GSE17721 CTRL VS POLYIC 1H BMDM UP                              | 193                 | 11 (5.7)                  | 10 (5.2)                    | 1 (0.5)                       | 0.0001  | 0.0006 | 0.0192           |                        |
| GSE8515 IL1 VS IL6 4H STIM )MAC UP                              | 187                 | 11 (5.9)                  | 11 (5.9)                    | 0 (0)                         | 0.0001  | 0.0007 | 0.0194           | neu                    |
| GSE20715 0H VS 24H OZONE LUNG UP                                | 193                 | 11 (5.7)                  | 11 (5.7)                    | 0 (0)                         | 0.0001  | 0.0007 | 0.0192           |                        |
| GSE24142 ADULT VS FETAL DN2 THYMOCYTE UP                        | 192                 | 11 (5.7)                  | 11 (5.7)                    | 0 (0)                         | 0.0001  | 0.0007 | 0.0192           | neu, mnc, dnc,<br>tcl  |
| GSE17721 CTRL VS LPS 2H BMDM DN                                 | 195                 | 11 (5.6)                  | 11 (5.6)                    | 0 (0)                         | 0.0001  | 0.0007 | 0.0191           | neu, mnc               |
| GSE36476 YOUNG VS OLD DONOR MEMORY CD4 TCELL 72H TSST<br>ACT DN | 196                 | 11 (5.6)                  | 11 (5.6)                    | 0 (0)                         | 0.0001  | 0.0007 | 0.0191           | neu                    |
| GSE9650 NAIVE VS MEMORY CD8 TCELL DN                            | 194                 | 11 (5.7)                  | 11 (5.7)                    | 0 (0)                         | 0.0001  | 0.0007 | 0.0191           | dnc                    |
| GSE30083 SP2 VS SP3 THYMOCYTE DN                                | 197                 | 11 (5.6)                  | 11 (5.6)                    | 0 (0)                         | 0.0001  | 0.0007 | 0.0190           | neu                    |
| GSE1432 6H VS 24H IFNG MICROGLIA UP                             | 192                 | 11 (5.7)                  | 11 (5.7)                    | 0 (0)                         | 0.0001  | 0.0007 | 0.0192           |                        |
| GSE20715 0H VS 24H OZONE TLR4 KO LUNG UP                        | 195                 | 11 (5.6)                  | 11 (5.6)                    | 0 (0)                         | 0.0001  | 0.0007 | 0.0191           | neu                    |
| GSE17721 LPS VS POLYIC 16H BMDM DN                              | 197                 | 11 (5.6)                  | 10 (5.1)                    | 1 (0.5)                       | 0.0001  | 0.0007 | 0.0190           | neu, mnc               |
| GSE26669 CTRL VS COSTIM BLOCK MLR CD4 TCELL UP                  | 199                 | 11 (5.5)                  | 11 (5.5)                    | 0 (0)                         | 0.0001  | 0.0007 | 0.0190           | neu, mnc, dnc          |
| GSE3982 BCELL VS BASOPHIL DN                                    | 202                 | 11 (5.4)                  | 11 (5.4)                    | 0 (0)                         | 0.0001  | 0.0007 | 0.0189           |                        |
| GSE3982 EOSINOPHIL VS BCELL UP                                  | 210                 | 11 (5.2)                  | 10 (4.8)                    | 1 (0.5)                       | 0.0001  | 0.0007 | 0.0186           |                        |
| GSE17721 LPS VS GARDIQUIMOD 4H BMDM UP                          | 190                 | 11 (5.8)                  | 11 (5.8)                    | 0 (0)                         | 0.0002  | 0.0008 | 0.0193           | neu                    |
| GSE3982 EOSINOPHIL VS DC DN                                     | 204                 | 11 (5.4)                  | 11 (5.4)                    | 0 (0)                         | 0.0002  | 0.0008 | 0.0188           |                        |
| GSE17721 CTRL VS LPS 12H BMDM DN                                | 204                 | 11 (5.4)                  | 11 (5.4)                    | 0 (0)                         | 0.0002  | 0.0008 | 0.0188           | neu, mnc               |
| GSE17974 IL4 AND ANTI IL12 VS UNTREATED 12H ACT CD4 TCELL<br>DN | 176                 | 10 (5.7)                  | 10 (5.7)                    | 0 (0)                         | 0.0002  | 0.0008 | 0.0179           | neu, mnc, tcl,<br>bcl  |
| GSE13411 IGM VS SWITCHED MEMORY BCELL DN                        | 193                 | 11 (5.7)                  | 11 (5.7)                    | 0 (0)                         | 0.0002  | 0.0009 | 0.0192           |                        |
| GSE36392 MAC VS NEUTROPHIL IL25 TREATED LUNG DN                 | 194                 | 11 (5.7)                  | 11 (5.7)                    | 0 (0)                         | 0.0002  | 0.0009 | 0.0191           | neu, dnc               |
| GSE7460 CTRL VS TGFB TREATED ACT FOXP3 MUT TCONV DN             | 198                 | 11 (5.6)                  | 11 (5.6)                    | 0 (0)                         | 0.0002  | 0.0009 | 0.0190           | mnc                    |
| GSE3982 BASOPHIL VS TH1 UP                                      | 215                 | 11 (5.1)                  | 11 (5.1)                    | 0 (0)                         | 0.0002  | 0.0009 | 0.0185           |                        |
| GSE12845 IGD NEG BLOOD VS DARKZONE GC TONSIL BCELL UP           | 175                 | 10 (5.7)                  | 10 (5.7)                    | 0 (0)                         | 0.0002  | 0.001  | 0.0180           | mnc                    |
| GSE20366 TREG VS NAIVE CD4 TCELL HOMEOSTATIC CONVER-<br>SION DN | 194                 | 11 (5.7)                  | 11 (5.7)                    | 0 (0)                         | 0.0002  | 0.0011 | 0.0191           | neu                    |
| GSE7460 TCONV VS TREG THYMUS UP                                 | 191                 | 11 (5.8)                  | 11 (5.8)                    | 0 (0)                         | 0.0002  | 0.0011 | 0.0192           |                        |
| GSE17721 12H VS 24H LPS BMDM UP                                 | 196                 | 11 (5.6)                  | 11 (5.6)                    | 0 (0)                         | 0.0002  | 0.0012 | 0.0191           | neu, mnc               |



| Category Name                                                 | Category<br>Genes # | Any-reg. DE<br>Genes #(%) | Up-reg.<br>DE Genes<br>#(%) | Down-reg.<br>DE Genes<br>#(%) | P-Value | FDR<br>Ad-<br>justed<br>P-Value | Jaccard<br>Index | Cell Type Over-<br>lap |
|---------------------------------------------------------------|---------------------|---------------------------|-----------------------------|-------------------------------|---------|---------------------------------|------------------|------------------------|
| GSE9988 ANTI TREM1 VS CTRL TREATED MONOCYTES DN               | 194                 | 11 (5.7)                  | 11 (5.7)                    | 0 (0)                         | 0.0003  | 0.0012                          | 0.0191           |                        |
| GSE17974 0H VS 0.5H IN VITRO ACT CD4 TCELL DN                 | 182                 | 10 (5.5)                  | 9 (4.9)                     | 1 (0.5)                       | 0.0003  | 0.0013                          | 0.0177           |                        |
| GSE3982 MEMORY CD4 TCELL VS BCELL DN                          | 184                 | 10 (5.4)                  | 10 (5.4)                    | 0 (0)                         | 0.0003  | 0.0013                          | 0.0177           | neu, dnc, tcl          |
| GSE9037 CTRL VS LPS 1H STIM BMDM DN                           | 190                 | 10 (5.3)                  | 10 (5.3)                    | 0 (0)                         | 0.0003  | 0.0013                          | 0.0175           | neu                    |
| GSE360 L MAJOR VS T GONDII MAC UP                             | 190                 | 10 (5.3)                  | 10 (5.3)                    | 0 (0)                         | 0.0003  | 0.0014                          | 0.0175           |                        |
| GSE1448 CTRL VS ANTI VALPHA2 DP THYMOCYTE DN                  | 191                 | 10 (5.2)                  | 9 (4.7)                     | 1 (0.5)                       | 0.0003  | 0.0015                          | 0.0175           | neu, mnc, dnc          |
| GSE10325 CD4 TCELL VS BCELL DN                                | 179                 | 10 (5.6)                  | 10 (5.6)                    | 0 (0)                         | 0.0003  | 0.0016                          | 0.0178           | neu, mnc, dnc          |
| GSE22886 NAIVE BCELL VS BM PLASMA CELL DN                     | 193                 | 10 (5.2)                  | 10 (5.2)                    | 0 (0)                         | 0.0004  | 0.0016                          | 0.0174           | mnc                    |
| GSE36392 TYPE 2 MYELOID VS NEUTROPHIL IL25 TREATED LUNG<br>DN | 195                 | 10 (5.1)                  | 10 (5.1)                    | 0 (0)                         | 0.0004  | 0.0017                          | 0.0173           |                        |
| GSE20151 CTRL VS FUSOBACT NUCLEATUM NEUTROPHIL UP             | 190                 | 10 (5.3)                  | 9 (4.7)                     | 1 (0.5)                       | 0.0004  | 0.0018                          | 0.0175           | neu, mnc, nkc          |
| GSE22886 NAIVE VS IGG IGA MEMORY BCELL DN                     | 193                 | 10 (5.2)                  | 10 (5.2)                    | 0 (0)                         | 0.0004  | 0.0018                          | 0.0174           | neu, dnc               |
| GSE20715 0H VS 48H OZONE TLR4 KO LUNG DN                      | 197                 | 10 (5.1)                  | 9 (4.6)                     | 1 (0.5)                       | 0.0004  | 0.0018                          | 0.0173           |                        |
| GSE3982 DC VS MAC DN                                          | 187                 | 10 (5.3)                  | 10 (5.3)                    | 0 (0)                         | 0.0004  | 0.0019                          | 0.0176           | neu                    |
| GSE7764 NKCELL VS SPLENOCYTE DN                               | 195                 | 10 (5.1)                  | 10 (5.1)                    | 0 (0)                         | 0.0004  | 0.0019                          | 0.0173           | neu, mnc               |
| GSE360 L DONOVANI VS B MALAYI LOW DOSE DC DN                  | 191                 | 10 (5.2)                  | 10 (5.2)                    | 0 (0)                         | 0.0004  | 0.0019                          | 0.0175           | neu                    |
| GSE29617 CTRL VS TIV FLU VACCINE PBMC 2008 UP                 | 179                 | 10 (5.6)                  | 10 (5.6)                    | 0 (0)                         | 0.0004  | 0.0019                          | 0.0178           |                        |
| GSE17974 0H VS 2H IN VITRO ACT CD4 TCELL DN                   | 194                 | 10 (5.2)                  | 8 (4.1)                     | 2 (1)                         | 0.0004  | 0.0019                          | 0.0174           |                        |
| GSE17721 0.5H VS 4H PAM3CSK4 BMDM UP                          | 196                 | 10 (5.1)                  | 10 (5.1)                    | 0 (0)                         | 0.0004  | 0.002                           | 0.0173           |                        |
| GSE11057 NAIVE VS EFF MEMORY CD4 TCELL DN                     | 194                 | 10 (5.2)                  | 10 (5.2)                    | 0 (0)                         | 0.0005  | 0.002                           | 0.0174           | neu                    |
| GSE13738 TCR VS BYSTANDER ACTIVATED CD4 TCELL DN              | 186                 | 10 (5.4)                  | 9 (4.8)                     | 1 (0.5)                       | 0.0005  | 0.0021                          | 0.0176           | neu                    |
| GSE7460 FOXP3 MUT VS HET ACT TCONV UP                         | 195                 | 10 (5.1)                  | 9 (4.6)                     | 1 (0.5)                       | 0.0005  | 0.0021                          | 0.0173           | neu                    |
| KAECH NAIVE VS DAY15 EFF CD8 TCELL DN                         | 195                 | 10 (5.1)                  | 10 (5.1)                    | 0 (0)                         | 0.0005  | 0.0021                          | 0.0173           | neu                    |
| GSE25087 FETAL VS ADULT TCONV UP                              | 199                 | 10 (5)                    | 10 (5)                      | 0 (0)                         | 0.0005  | 0.0021                          | 0.0172           | neu, tcl               |
| GSE22886 NAIVE CD4 TCELL VS 48H ACT TH2 UP                    | 191                 | 10 (5.2)                  | 9 (4.7)                     | 1 (0.5)                       | 0.0005  | 0.0022                          | 0.0175           |                        |
| GSE17974 CTRL VS ACT IL4 AND ANTI IL12 72H CD4 TCELL UP       | 187                 | 10 (5.3)                  | 10 (5.3)                    | 0 (0)                         | 0.0005  | 0.0022                          | 0.0176           | mnc, dnc               |
| GSE17721 LPS VS GARDIQUIMOD 24H BMDM UP                       | 198                 | 10 (5.1)                  | 10 (5.1)                    | 0 (0)                         | 0.0005  | 0.0022                          | 0.0172           | neu, dnc               |
| GSE17721 LPS VS CPG 6H BMDM UP                                | 189                 | 10 (5.3)                  | 10 (5.3)                    | 0 (0)                         | 0.0005  | 0.0023                          | 0.0175           | neu, dnc               |
| GSE17721 POLYIC VS GARDIQUIMOD 2H BMDM UP                     | 192                 | 10 (5.2)                  | 9 (4.7)                     | 1 (0.5)                       | 0.0005  | 0.0023                          | 0.0174           | neu                    |
| GSE13484 12H VS 3H YF17D VACCINE STIM PBMC DN                 | 196                 | 10 (5.1)                  | 10 (5.1)                    | 0 (0)                         | 0.0005  | 0.0023                          | 0.0173           | neu, tcl, nkc          |
| GSE17721 0.5H VS 8H POLYIC BMDM UP                            | 197                 | 10 (5.1)                  | 9 (4.6)                     | 1 (0.5)                       | 0.0005  | 0.0023                          | 0.0173           |                        |
| GSE17721 PAM3CSK4 VS GADIQUIMOD 8H BMDM DN                    | 191                 | 10 (5.2)                  | 10 (5.2)                    | 0 (0)                         | 0.0005  | 0.0024                          | 0.0175           | neu                    |
| GSE3982 MAC VS NKCELL UP                                      | 191                 | 10 (5.2)                  | 10 (5.2)                    | 0 (0)                         | 0.0005  | 0.0024                          | 0.0175           |                        |
| GSE7852 LN VS THYMUS TCONV UP                                 | 190                 | 10 (5.3)                  | 10 (5.3)                    | 0 (0)                         | 0.0006  | 0.0024                          | 0.0175           | neu, mnc, tcl          |
| GSE17974 0H VS 72H IN VITRO ACT CD4 TCELL UP                  | 193                 | 10 (5.2)                  | 10 (5.2)                    | 0 (0)                         | 0.0006  | 0.0024                          | 0.0174           |                        |
| GSE17721 POLYIC VS CPG 12H BMDM UP                            | 195                 | 10 (5.1)                  | 9 (4.6)                     | 1 (0.5)                       | 0.0006  | 0.0024                          | 0.0173           |                        |
| GSE7460 TREG VS TCONV ACT WITH TGFB UP                        | 187                 | 10 (5.3)                  | 9 (4.8)                     | 1 (0.5)                       | 0.0006  | 0.0024                          | 0.0176           |                        |

| Category Name                                    | Category<br>Genes # | Any-reg. DE<br>Genes #(%) | Up-reg.<br>DE Genes<br>#(%) | Down-reg.<br>DE Genes<br>#(%) | P-Value | FDR<br>Ad-<br>justed<br>P-Value | Jaccard<br>Index | Cell Type Over-<br>lap |
|--------------------------------------------------|---------------------|---------------------------|-----------------------------|-------------------------------|---------|---------------------------------|------------------|------------------------|
| GSE2826 WT VS XID BCELL UP                       | 195                 | 10 (5.1)                  | 10 (5.1)                    | 0 (0)                         | 0.0006  | 0.0024                          | 0.0173           |                        |
| GSE9988 LPS VS VEHICLE TREATED MONOCYTE DN       | 196                 | 10 (5.1)                  | 10 (5.1)                    | 0 (0)                         | 0.0006  | 0.0024                          | 0.0173           |                        |
| GSE13485 CTRL VS DAY3 YF17D VACCINE PBMC UP      | 178                 | 9 (5.1)                   | 9 (5.1)                     | 0 (0)                         | 0.0006  | 0.0024                          | 0.0160           |                        |
| GSE17721 PAM3CSK4 VS GADIQUIMOD 6H BMDM DN       | 191                 | 10 (5.2)                  | 10 (5.2)                    | 0 (0)                         | 0.0006  | 0.0024                          | 0.0175           | neu                    |
| KAECH DAY8 EFF VS MEMORY CD8 TCELL DN            | 194                 | 10 (5.2)                  | 10 (5.2)                    | 0 (0)                         | 0.0006  | 0.0024                          | 0.0174           | neu, mnc               |
| GSE17721 CTRL VS POLYIC 12H BMDM DN              | 197                 | 10 (5.1)                  | 10 (5.1)                    | 0 (0)                         | 0.0006  | 0.0024                          | 0.0173           | neu, mnc, dnc,<br>bcl  |
| GSE13306 RA VS UNTREATED MEM CD4 TCELL DN        | 204                 | 10 (4.9)                  | 10 (4.9)                    | 0 (0)                         | 0.0006  | 0.0024                          | 0.0171           | neu                    |
| GSE17721 CPG VS GARDIQUIMOD 6H BMDM UP           | 196                 | 10 (5.1)                  | 10 (5.1)                    | 0 (0)                         | 0.0006  | 0.0025                          | 0.0173           | neu, tcl               |
| GSE17721 CTRL VS LPS 0.5H BMDM UP                | 194                 | 10 (5.2)                  | 10 (5.2)                    | 0 (0)                         | 0.0006  | 0.0025                          | 0.0174           | neu, mnc               |
| GSE30083 SP1 VS SP3 THYMOCYTE DN                 | 196                 | 10 (5.1)                  | 10 (5.1)                    | 0 (0)                         | 0.0006  | 0.0026                          | 0.0173           | neu, mnc               |
| GSE9650 EFFECTOR VS MEMORY CD8 TCELL DN          | 195                 | 10 (5.1)                  | 10 (5.1)                    | 0 (0)                         | 0.0006  | 0.0026                          | 0.0173           |                        |
| GSE37416 0H VS 6H F TULARENSIS LVS NEUTROPHIL DN | 190                 | 10 (5.3)                  | 10 (5.3)                    | 0 (0)                         | 0.0006  | 0.0026                          | 0.0175           | neu                    |
| GSE9037 WT VS IRAK4 KO LPS 4H STIM BMDM UP       | 194                 | 10 (5.2)                  | 10 (5.2)                    | 0 (0)                         | 0.0006  | 0.0026                          | 0.0174           |                        |
| GSE27786 NEUTROPHIL VS MONO MAC UP               | 199                 | 10 (5)                    | 9 (4.5)                     | 1 (0.5)                       | 0.0006  | 0.0027                          | 0.0172           |                        |
| GSE31082 DP VS CD4 SP THYMOCYTE DN               | 193                 | 10 (5.2)                  | 10 (5.2)                    | 0 (0)                         | 0.0007  | 0.0027                          | 0.0174           | neu, mnc, dnc,<br>tcl  |
| GSE17721 POLYIC VS GARDIQUIMOD 4H BMDM UP        | 196                 | 10 (5.1)                  | 9 (4.6)                     | 1 (0.5)                       | 0.0007  | 0.0027                          | 0.0173           | neu                    |
| GSE20366 CD103 KLRG1 DP VS DN TREG DN            | 194                 | 10 (5.2)                  | 10 (5.2)                    | 0 (0)                         | 0.0007  | 0.0028                          | 0.0174           |                        |
| GSE17721 CTRL VS GARDIQUIMOD 1H BMDM DN          | 198                 | 10 (5.1)                  | 10 (5.1)                    | 0 (0)                         | 0.0007  | 0.0029                          | 0.0172           | neu                    |
| GSE17721 CTRL VS LPS 6H BMDM DN                  | 202                 | 10 (5)                    | 10 (5)                      | 0 (0)                         | 0.0007  | 0.0029                          | 0.0171           | neu                    |
| GSE9988 LOW LPS VS VEHICLE TREATED MONOCYTE DN   | 195                 | 10 (5.1)                  | 10 (5.1)                    | 0 (0)                         | 0.0007  | 0.0029                          | 0.0173           |                        |
| GSE20715 0H VS 24H OZONE TLR4 KO LUNG DN         | 201                 | 10 (5)                    | 10 (5)                      | 0 (0)                         | 0.0007  | 0.0029                          | 0.0172           | mnc                    |
| GSE6269 E COLI VS STREP AUREUS INF PBMC DN       | 166                 | 9 (5.4)                   | 9 (5.4)                     | 0 (0)                         | 0.0007  | 0.0029                          | 0.0164           |                        |
| GSE7852 TREG VS TCONV FAT UP                     | 193                 | 10 (5.2)                  | 10 (5.2)                    | 0 (0)                         | 0.0007  | 0.0029                          | 0.0174           | neu                    |
| GSE17721 LPS VS PAM3CSK4 1H BMDM DN              | 196                 | 10 (5.1)                  | 8 (4.1)                     | 2 (1)                         | 0.0007  | 0.0029                          | 0.0173           | neu                    |
| GSE17721 PAM3CSK4 VS CPG 24H BMDM DN             | 199                 | 10 (5)                    | 10 (5)                      | 0 (0)                         | 0.0007  | 0.0029                          | 0.0172           | neu, mnc, tcl          |
| GSE17721 POLYIC VS GARDIQUIMOD 6H BMDM UP        | 198                 | 10 (5.1)                  | 10 (5.1)                    | 0 (0)                         | 0.0007  | 0.0029                          | 0.0172           | tcl                    |
| GSE14769 UNSTIM VS 20MIN LPS BMDM DN             | 197                 | 10 (5.1)                  | 10 (5.1)                    | 0 (0)                         | 0.0007  | 0.003                           | 0.0173           | dnc, tcl               |
| GSE17721 POLYIC VS GARDIQUIMOD 12H BMDM UP       | 196                 | 10 (5.1)                  | 10 (5.1)                    | 0 (0)                         | 0.0008  | 0.003                           | 0.0173           | neu, mnc, dnc          |
| GSE13306 RA VS UNTREATED TREG DN                 | 202                 | 10 (5)                    | 9 (4.5)                     | 1 (0.5)                       | 0.0008  | 0.003                           | 0.0171           |                        |
| GSE17721 CTRL VS CPG 8H BMDM DN                  | 198                 | 10 (5.1)                  | 9 (4.5)                     | 1 (0.5)                       | 0.0008  | 0.0031                          | 0.0172           | neu, dnc               |
| GSE7852 TREG VS TCONV LN UP                      | 191                 | 10 (5.2)                  | 9 (4.7)                     | 1 (0.5)                       | 0.0008  | 0.0032                          | 0.0175           | tcl                    |
| GSE17721 0.5H VS 8H POLYIC BMDM DN               | 194                 | 10 (5.2)                  | 9 (4.6)                     | 1 (0.5)                       | 0.0008  | 0.0032                          | 0.0174           | mnc                    |
| GSE22886 TH1 VS TH2 48H ACT DN                   | 200                 | 10 (5)                    | 10 (5)                      | 0 (0)                         | 0.0008  | 0.0032                          | 0.0172           | neu                    |
| GSE7460 TCONV VS TREG LN DN                      | 194                 | 10 (5.2)                  | 10 (5.2)                    | 0 (0)                         | 0.0008  | 0.0033                          | 0.0174           | dnc, tcl               |

Appendix "PBMC response to AS03-H5N1 vaccine"

Howard, Goll et al.

| Category Name                                               | Category<br>Genes # | Any-reg. DE<br>Genes #(%) | Up-reg.<br>DE Genes<br>#(%) | Down-reg.<br>DE Genes<br>#(%) | P-Value | FDR<br>Ad-<br>justed<br>P-Value | Jaccard<br>Index | Cell Type Over-<br>lap |
|-------------------------------------------------------------|---------------------|---------------------------|-----------------------------|-------------------------------|---------|---------------------------------|------------------|------------------------|
| GSE27786 CD8 TCELL VS NKCELL DN                             | 197                 | 10 (5.1)                  | 10 (5.1)                    | 0 (0)                         | 0.0009  | 0.0036                          | 0.0173           | neu, mnc               |
| GSE17974 0H VS 1H IN VITRO ACT CD4 TCELL UP                 | 180                 | 9 (5)                     | 9 (5)                       | 0 (0)                         | 0.001   | 0.0041                          | 0.0160           | neu, mnc               |
| GSE14000 4H VS 16H LPS DC UP                                | 184                 | 9 (4.9)                   | 9 (4.9)                     | 0 (0)                         | 0.0011  | 0.0042                          | 0.0159           | neu                    |
| GSE360 DC VS MAC B MALAYI LOW DOSE DN                       | 186                 | 9 (4.8)                   | 9 (4.8)                     | 0 (0)                         | 0.0011  | 0.0044                          | 0.0158           | neu, mnc               |
| GSE29615 CTRL VS LAIV FLU VACCINE PBMC UP                   | 184                 | 9 (4.9)                   | 8 (4.3)                     | 1 (0.5)                       | 0.0012  | 0.0045                          | 0.0159           | neu, mnc               |
| GSE11864 UNTREATED VS CSF1 IN MAC UP                        | 185                 | 9 (4.9)                   | 9 (4.9)                     | 0 (0)                         | 0.0012  | 0.0046                          | 0.0158           | dnc                    |
| GSE13411 SWITCHED MEMORY BCELL VS PLASMA CELL DN            | 199                 | 9 (4.5)                   | 8 (4)                       | 1 (0.5)                       | 0.0012  | 0.0049                          | 0.0155           | neu, mnc               |
| GSE9037 WT VS IRAK4 KO LPS 1H STIM BMDM DN                  | 189                 | 9 (4.8)                   | 8 (4.2)                     | 1 (0.5)                       | 0.0013  | 0.0049                          | 0.0157           |                        |
| GSE17721 0.5H VS 12H CPG BMDM UP                            | 191                 | 9 (4.7)                   | 8 (4.2)                     | 1 (0.5)                       | 0.0013  | 0.0051                          | 0.0157           |                        |
| GSE7400 CTRL VS CSF3 IN VIVO TREATED PBMC DN                | 193                 | 9 (4.7)                   | 9 (4.7)                     | 0 (0)                         | 0.0013  | 0.0051                          | 0.0156           | neu                    |
| GSE17974 IL4 AND ANTI IL12 VS UNTREATED 2H ACT CD4 TCELL UP | 187                 | 9 (4.8)                   | 8 (4.3)                     | 1 (0.5)                       | 0.0013  | 0.0051                          | 0.0158           | neu, mnc               |
| GSE17721 LPS VS CPG 12H BMDM DN                             | 187                 | 9 (4.8)                   | 8 (4.3)                     | 1 (0.5)                       | 0.0013  | 0.0052                          | 0.0158           |                        |
| GSE11864 UNTREATED VS CSF1 IFNG PAM3CYS IN MAC DN           | 186                 | 9 (4.8)                   | 9 (4.8)                     | 0 (0)                         | 0.0014  | 0.0053                          | 0.0158           |                        |
| GSE15930 STIM VS STIM AND IL-12 24H CD8 T CELL DN           | 198                 | 9 (4.5)                   | 7 (3.5)                     | 2 (1)                         | 0.0014  | 0.0053                          | 0.0155           |                        |
| GSE3337 4H VS 16H IFNG IN CD8POS DC UP                      | 200                 | 9 (4.5)                   | 9 (4.5)                     | 0 (0)                         | 0.0014  | 0.0055                          | 0.0154           |                        |
| KAECH DAY8 EFF VS MEMORY CD8 TCELL UP                       | 198                 | 9 (4.5)                   | 9 (4.5)                     | 0 (0)                         | 0.0014  | 0.0055                          | 0.0155           | neu                    |
| GSE36476 CTRL VS TSST ACT 40H MEMORY CD4 TCELL YOUNG DN     | 193                 | 9 (4.7)                   | 9 (4.7)                     | 0 (0)                         | 0.0015  | 0.0058                          | 0.0156           | neu, dnc               |
| GSE3982 MAC VS NEUTROPHIL LPS STIM UP                       | 194                 | 9 (4.6)                   | 9 (4.6)                     | 0 (0)                         | 0.0015  | 0.0058                          | 0.0156           |                        |
| GSE17721 CTRL VS CPG 24H BMDM UP                            | 192                 | 9 (4.7)                   | 9 (4.7)                     | 0 (0)                         | 0.0015  | 0.0059                          | 0.0157           |                        |
| GSE17974 CTRL VS ACT IL4 AND ANTI IL12 0.5H CD4 TCELL DN    | 193                 | 9 (4.7)                   | 8 (4.1)                     | 1 (0.5)                       | 0.0016  | 0.0059                          | 0.0156           |                        |
| GSE22886 NAIVE BCELL VS BLOOD PLASMA CELL DN                | 185                 | 9 (4.9)                   | 9 (4.9)                     | 0 (0)                         | 0.0016  | 0.0059                          | 0.0158           | mnc, tcl               |
| GSE22886 NAIVE CD4 TCELL VS MEMORY TCELL UP                 | 189                 | 9 (4.8)                   | 7 (3.7)                     | 2 (1.1)                       | 0.0016  | 0.0059                          | 0.0157           |                        |
| GSE36476 CTRL VS TSST ACT 72H MEMORY CD4 TCELL YOUNG DN     | 192                 | 9 (4.7)                   | 9 (4.7)                     | 0 (0)                         | 0.0016  | 0.0059                          | 0.0157           | neu                    |
| GSE17721 LPS VS GARDIQUIMOD 0.5H BMDM UP                    | 195                 | 9 (4.6)                   | 9 (4.6)                     | 0 (0)                         | 0.0016  | 0.0059                          | 0.0156           |                        |
| GSE10094 LCMV VS LISTERIA IND EFF CD4 TCELL DN              | 193                 | 9 (4.7)                   | 9 (4.7)                     | 0 (0)                         | 0.0016  | 0.0059                          | 0.0156           |                        |
| GSE9650 NAIVE VS EFF CD8 TCELL DN                           | 200                 | 9 (4.5)                   | 9 (4.5)                     | 0 (0)                         | 0.0016  | 0.0059                          | 0.0154           | neu                    |
| GSE15930 NAIVE VS 72H IN VITRO STIM IFNAB CD8 TCELL DN      | 196                 | 9 (4.6)                   | 9 (4.6)                     | 0 (0)                         | 0.0016  | 0.0059                          | 0.0155           | neu, tcl               |
| GSE17721 CTRL VS LPS 4H BMDM DN                             | 199                 | 9 (4.5)                   | 8 (4)                       | 1 (0.5)                       | 0.0016  | 0.006                           | 0.0155           | neu                    |
| GSE2706 UNSTIM VS 8H R848 DC UP                             | 196                 | 9 (4.6)                   | 7 (3.6)                     | 2 (1)                         | 0.0016  | 0.0061                          | 0.0155           | mnc                    |
| GSE3982 MAST CELL VS TH1 DN                                 | 185                 | 9 (4.9)                   | 8 (4.3)                     | 1 (0.5)                       | 0.0017  | 0.0062                          | 0.0158           | neu, mnc               |
| GSE3337 4H VS 16H IFNG IN CD8POS DC DN                      | 197                 | 9 (4.6)                   | 9 (4.6)                     | 0 (0)                         | 0.0017  | 0.0062                          | 0.0155           | neu, mnc               |
| GSE26928 NAIVE VS CENT MEMORY CD4 TCELL DN                  | 188                 | 9 (4.8)                   | 9 (4.8)                     | 0 (0)                         | 0.0017  | 0.0062                          | 0.0158           | neu                    |
| GSE39820 CTRL VS IL1B IL6 CD4 TCELL DN                      | 190                 | 9 (4.7)                   | 7 (3.7)                     | 2 (1.1)                       | 0.0017  | 0.0062                          | 0.0157           |                        |
| GSE32423 MEMORY VS NAIVE CD8 TCELL UP                       | 194                 | 9 (4.6)                   | 7 (3.6)                     | 2 (1)                         | 0.0017  | 0.0063                          | 0.0156           |                        |
| GSE22886 CD8 TCELL VS BCELL NAIVE DN                        | 186                 | 9 (4.8)                   | 9 (4.8)                     | 0 (0)                         | 0.0017  | 0.0064                          | 0.0158           |                        |
| GSE13306 RA VS UNTREATED TCONV DN                           | 196                 | 9 (4.6)                   | 9 (4.6)                     | 0 (0)                         | 0.0017  | 0.0064                          | 0.0155           |                        |

| Category Name                                       | Category<br>Genes # | Any-reg. DE<br>Genes #(%) | Up-reg.<br>DE Genes<br>#(%) | Down-reg.<br>DE Genes<br>#(%) | P-Value | FDR<br>Ad-<br>justed<br>P-Value | Jaccard<br>Index | Cell Type Over-<br>lap |
|-----------------------------------------------------|---------------------|---------------------------|-----------------------------|-------------------------------|---------|---------------------------------|------------------|------------------------|
| GSE10856 CTRL VS TNFRSF6B IN MACROPHAGE UP          | 184                 | 9 (4.9)                   | 9 (4.9)                     | 0 (0)                         | 0.0018  | 0.0065                          | 0.0159           | neu, mnc               |
| GSE17721 4 VS 24H CPG BMDM UP                       | 190                 | 9 (4.7)                   | 7 (3.7)                     | 2 (1.1)                       | 0.0018  | 0.0065                          | 0.0157           | neu                    |
| GSE17721 CTRL VS PAM3CSK4 2H BMDM DN                | 192                 | 9 (4.7)                   | 8 (4.2)                     | 1 (0.5)                       | 0.0018  | 0.0065                          | 0.0157           |                        |
| GSE2706 R848 VS R848 AND LPS 8H STIM DC UP          | 190                 | 9 (4.7)                   | 9 (4.7)                     | 0 (0)                         | 0.0018  | 0.0065                          | 0.0157           |                        |
| GSE17721 CPG VS GARDIQUIMOD 2H BMDM UP              | 197                 | 9 (4.6)                   | 9 (4.6)                     | 0 (0)                         | 0.0018  | 0.0065                          | 0.0155           | mnc                    |
| GSE6269 E COLI VS STREP PNEUMO INF PBMC DN          | 156                 | 8 (5.1)                   | 7 (4.5)                     | 1 (0.6)                       | 0.0018  | 0.0065                          | 0.0148           |                        |
| GSE11864 UNTREATED VS CSF1 IFNG IN MAC DN           | 187                 | 9 (4.8)                   | 9 (4.8)                     | 0 (0)                         | 0.0018  | 0.0066                          | 0.0158           | neu, mnc, nkc          |
| GSE7852 LN VS FAT TCONV DN                          | 185                 | 9 (4.9)                   | 9 (4.9)                     | 0 (0)                         | 0.0018  | 0.0066                          | 0.0158           |                        |
| GSE36392 TYPE 2 MYELOID VS MAC IL25 TREATED LUNG UP | 192                 | 9 (4.7)                   | 9 (4.7)                     | 0 (0)                         | 0.0019  | 0.0068                          | 0.0157           |                        |
| GSE17721 LPS VS GARDIQUIMOD 12H BMDM DN             | 195                 | 9 (4.6)                   | 9 (4.6)                     | 0 (0)                         | 0.0019  | 0.0068                          | 0.0156           |                        |
| GSE15930 STIM VS STIM AND IL-12 48H CD8 T CELL UP   | 196                 | 9 (4.6)                   | 9 (4.6)                     | 0 (0)                         | 0.0019  | 0.0068                          | 0.0155           | neu, mnc               |
| GSE339 CD8POS VS CD4CD8DN DC IN CULTURE UP          | 201                 | 9 (4.5)                   | 9 (4.5)                     | 0 (0)                         | 0.0019  | 0.0068                          | 0.0154           | neu                    |
| KAECH DAY15 EFF VS MEMORY CD8 TCELL DN              | 193                 | 9 (4.7)                   | 8 (4.1)                     | 1 (0.5)                       | 0.0019  | 0.007                           | 0.0156           | neu                    |
| GSE17721 4 VS 24H CPG BMDM DN                       | 194                 | 9 (4.6)                   | 9 (4.6)                     | 0 (0)                         | 0.0019  | 0.007                           | 0.0156           |                        |
| GSE17974 2H VS 72H UNTREATED IN VITRO CD4 TCELL UP  | 188                 | 9 (4.8)                   | 9 (4.8)                     | 0 (0)                         | 0.002   | 0.007                           | 0.0158           |                        |
| GSE17721 POLYIC VS PAM3CSK4 6H BMDM UP              | 192                 | 9 (4.7)                   | 7 (3.6)                     | 2 (1)                         | 0.002   | 0.007                           | 0.0157           |                        |
| GSE17721 LPS VS GARDIQUIMOD 8H BMDM UP              | 194                 | 9 (4.6)                   | 8 (4.1)                     | 1 (0.5)                       | 0.002   | 0.007                           | 0.0156           | neu                    |
| GSE15930 STIM VS STIM AND IL-12 48H CD8 T CELL DN   | 197                 | 9 (4.6)                   | 9 (4.6)                     | 0 (0)                         | 0.002   | 0.007                           | 0.0155           | neu, mnc, dnc          |
| GSE7764 IL15 NK CELL 24H VS SPLENOCYTE DN           | 193                 | 9 (4.7)                   | 9 (4.7)                     | 0 (0)                         | 0.002   | 0.007                           | 0.0156           | neu                    |
| GSE27786 BCELL VS NKCELL DN                         | 194                 | 9 (4.6)                   | 8 (4.1)                     | 1 (0.5)                       | 0.002   | 0.0071                          | 0.0156           |                        |
| GSE17721 POLYIC VS PAM3CSK4 2H BMDM DN              | 194                 | 9 (4.6)                   | 9 (4.6)                     | 0 (0)                         | 0.002   | 0.0071                          | 0.0156           |                        |
| GSE2826 WT VS BTK KO BCELL DN                       | 197                 | 9 (4.6)                   | 9 (4.6)                     | 0 (0)                         | 0.002   | 0.0071                          | 0.0155           | mnc                    |
| GSE15930 NAIVE VS 48H IN VITRO STIM CD8 TCELL UP    | 190                 | 9 (4.7)                   | 8 (4.2)                     | 1 (0.5)                       | 0.002   | 0.0071                          | 0.0157           | neu                    |
| GSE360 CTRL VS L DONOVANI DC UP                     | 193                 | 9 (4.7)                   | 9 (4.7)                     | 0 (0)                         | 0.002   | 0.0071                          | 0.0156           |                        |
| GSE24634 NAIVE CD4 TCELL VS DAY3 IL4 CONV TREG DN   | 199                 | 9 (4.5)                   | 9 (4.5)                     | 0 (0)                         | 0.002   | 0.0071                          | 0.0155           | neu                    |
| GSE17721 LPS VS GARDIQUIMOD 8H BMDM DN              | 192                 | 9 (4.7)                   | 9 (4.7)                     | 0 (0)                         | 0.002   | 0.0072                          | 0.0157           |                        |
| GSE17721 PAM3CSK4 VS CPG 8H BMDM DN                 | 194                 | 9 (4.6)                   | 8 (4.1)                     | 1 (0.5)                       | 0.0021  | 0.0072                          | 0.0156           |                        |
| GSE14769 20MIN VS 360MIN LPS BMDM DN                | 188                 | 9 (4.8)                   | 8 (4.3)                     | 1 (0.5)                       | 0.0021  | 0.0072                          | 0.0158           |                        |
| GSE27786 LSK VS NKTCELL UP                          | 190                 | 9 (4.7)                   | 9 (4.7)                     | 0 (0)                         | 0.0021  | 0.0072                          | 0.0157           |                        |
| GSE3982 MAST CELL VS EFF MEMORY CD4 TCELL UP        | 192                 | 9 (4.7)                   | 9 (4.7)                     | 0 (0)                         | 0.0021  | 0.0072                          | 0.0157           |                        |
| GSE16522 MEMORY VS NAIVE CD8 TCELL DN               | 194                 | 9 (4.6)                   | 9 (4.6)                     | 0 (0)                         | 0.0021  | 0.0073                          | 0.0156           |                        |
| GSE30083 SP1 VS SP2 THYMOCYTE DN                    | 194                 | 9 (4.6)                   | 9 (4.6)                     | 0 (0)                         | 0.0021  | 0.0074                          | 0.0156           | neu, mnc, dnc,<br>tcl  |
| GSE17721 CTRL VS POLYIC 24H BMDM DN                 | 200                 | 9 (4.5)                   | 8 (4)                       | 1 (0.5)                       | 0.0021  | 0.0074                          | 0.0154           | mnc                    |
| GSE17721 POLYIC VS CPG 16H BMDM UP                  | 194                 | 9 (4.6)                   | 9 (4.6)                     | 0 (0)                         | 0.0022  | 0.0075                          | 0.0156           |                        |
| GSE13306 TREG VS TCONV UP                           | 196                 | 9 (4.6)                   | 8 (4.1)                     | 1 (0.5)                       | 0.0022  | 0.0075                          | 0.0155           | neu, tcl               |

| Category Name                                             | Category<br>Genes # | Any-reg. DE<br>Genes #(%) | Up-reg.<br>DE Genes<br>#(%) | Down-reg.<br>DE Genes<br>#(%) | P-Value | FDR<br>Ad-<br>justed<br>P-Value | Jaccard<br>Index | Cell Type Over-<br>lap |
|-----------------------------------------------------------|---------------------|---------------------------|-----------------------------|-------------------------------|---------|---------------------------------|------------------|------------------------|
| GSE17721 CTRL VS PAM3CSK4 24H BMDM UP                     | 198                 | 9 (4.5)                   | 9 (4.5)                     | 0 (0)                         | 0.0022  | 0.0075                          | 0.0155           |                        |
| GSE15930 NAIVE VS 24H IN VITRO STIM INFAB CD8 TCELL UP    | 194                 | 9 (4.6)                   | 8 (4.1)                     | 1 (0.5)                       | 0.0022  | 0.0075                          | 0.0156           |                        |
| GSE17721 0.5H VS 24H GARDIQUIMOD BMDM DN                  | 194                 | 9 (4.6)                   | 9 (4.6)                     | 0 (0)                         | 0.0022  | 0.0076                          | 0.0156           | neu                    |
| GSE20715 WT VS TLR4 KO 24H OZONE LUNG UP                  | 196                 | 9 (4.6)                   | 9 (4.6)                     | 0 (0)                         | 0.0022  | 0.0076                          | 0.0155           |                        |
| GSE17721 LPS VS GARDIQUIMOD 6H BMDM UP                    | 195                 | 9 (4.6)                   | 9 (4.6)                     | 0 (0)                         | 0.0022  | 0.0077                          | 0.0156           | neu                    |
| GSE27786 CD4 TCELL VS MONO MAC DN                         | 199                 | 9 (4.5)                   | 8 (4)                       | 1 (0.5)                       | 0.0022  | 0.0077                          | 0.0155           |                        |
| GSE14308 TH1 VS TH17 UP                                   | 197                 | 9 (4.6)                   | 7 (3.6)                     | 2 (1)                         | 0.0023  | 0.0077                          | 0.0155           | neu                    |
| GSE14769 40MIN VS 360MIN LPS BMDM DN                      | 194                 | 9 (4.6)                   | 8 (4.1)                     | 1 (0.5)                       | 0.0023  | 0.0078                          | 0.0156           |                        |
| GSE17721 POLYIC VS GARDIQUIMOD 24H BMDM UP                | 194                 | 9 (4.6)                   | 8 (4.1)                     | 1 (0.5)                       | 0.0023  | 0.0078                          | 0.0156           |                        |
| GSE20715 0H VS 48H OZONE TLR4 KO LUNG UP                  | 195                 | 9 (4.6)                   | 9 (4.6)                     | 0 (0)                         | 0.0023  | 0.0078                          | 0.0156           | neu, dnc               |
| GSE17721 POLYIC VS GARDIQUIMOD 8H BMDM UP                 | 195                 | 9 (4.6)                   | 9 (4.6)                     | 0 (0)                         | 0.0023  | 0.0078                          | 0.0156           | neu                    |
| KAECH DAY8 EFF VS DAY15 EFF CD8 TCELL DN                  | 194                 | 9 (4.6)                   | 9 (4.6)                     | 0 (0)                         | 0.0023  | 0.0078                          | 0.0156           | neu, mnc               |
| GSE360 T GONDII VS B MALAYI HIGH DOSE MAC UP              | 208                 | 9 (4.3)                   | 9 (4.3)                     | 0 (0)                         | 0.0023  | 0.0078                          | 0.0152           | neu, dnc               |
| GSE17721 4H VS 24H POLYIC BMDM DN                         | 198                 | 9 (4.5)                   | 8 (4)                       | 1 (0.5)                       | 0.0024  | 0.008                           | 0.0155           |                        |
| GSE15930 STIM VS STIM AND IL-12 72H CD8 T CELL UP         | 205                 | 9 (4.4)                   | 9 (4.4)                     | 0 (0)                         | 0.0024  | 0.0081                          | 0.0153           | neu, mnc               |
| GSE17721 0.5H VS 8H LPS BMDM DN                           | 192                 | 9 (4.7)                   | 9 (4.7)                     | 0 (0)                         | 0.0024  | 0.0081                          | 0.0157           | neu, mnc               |
| GSE37416 CTRL VS 12H F TULARENSIS LVS NEUTROPHIL DN       | 197                 | 9 (4.6)                   | 9 (4.6)                     | 0 (0)                         | 0.0024  | 0.0081                          | 0.0155           |                        |
| GSE3982 NEUTROPHIL VS TH1 UP                              | 190                 | 9 (4.7)                   | 9 (4.7)                     | 0 (0)                         | 0.0025  | 0.0083                          | 0.0157           |                        |
| GSE12366 GC VS MEMORY BCELL DN                            | 193                 | 9 (4.7)                   | 9 (4.7)                     | 0 (0)                         | 0.0025  | 0.0083                          | 0.0156           | neu                    |
| GSE9006 HEALTHY VS TYPE 1 DIABETES PBMC 4MONTH POST DX UP | 193                 | 9 (4.7)                   | 9 (4.7)                     | 0 (0)                         | 0.0025  | 0.0083                          | 0.0156           | neu, dnc               |
| GSE14350 IL2RB KO VS WT TREG UP                           | 196                 | 9 (4.6)                   | 8 (4.1)                     | 1 (0.5)                       | 0.0025  | 0.0084                          | 0.0155           | tcl                    |
| GSE27786 NKTCELL VS ERYTHROBLAST UP                       | 198                 | 9 (4.5)                   | 9 (4.5)                     | 0 (0)                         | 0.0025  | 0.0084                          | 0.0155           | neu                    |
| GSE17721 LPS VS CPG 8H BMDM UP                            | 197                 | 9 (4.6)                   | 8 (4.1)                     | 1 (0.5)                       | 0.0025  | 0.0084                          | 0.0155           | neu, mnc, dnc          |
| GSE20366 EX VIVO VS DEC205 CONVERSION UP                  | 194                 | 9 (4.6)                   | 9 (4.6)                     | 0 (0)                         | 0.0026  | 0.0085                          | 0.0156           |                        |
| GSE30962 ACUTE VS CHRONIC LCMV SECONDARY INF CD8 TCELL DN | 194                 | 9 (4.6)                   | 9 (4.6)                     | 0 (0)                         | 0.0026  | 0.0087                          | 0.0156           | neu, mnc               |
| GSE7852 THYMUS VS FAT TCONV DN                            | 192                 | 9 (4.7)                   | 9 (4.7)                     | 0 (0)                         | 0.0026  | 0.0087                          | 0.0157           | neu, mnc               |
| GSE27786 LSK VS LIN NEG CELL UP                           | 194                 | 9 (4.6)                   | 8 (4.1)                     | 1 (0.5)                       | 0.0026  | 0.0087                          | 0.0156           | neu                    |
| GSE14308 TH17 VS NATURAL TREG DN                          | 194                 | 9 (4.6)                   | 8 (4.1)                     | 1 (0.5)                       | 0.0028  | 0.0092                          | 0.0156           |                        |
| GSE26669 CD4 VS CD8 TCELL IN MLR COSTIM BLOCK UP          | 196                 | 9 (4.6)                   | 9 (4.6)                     | 0 (0)                         | 0.0029  | 0.0095                          | 0.0155           |                        |
| GSE17721 0.5H VS 4H GARDIQUIMOD BMDM DN                   | 197                 | 9 (4.6)                   | 9 (4.6)                     | 0 (0)                         | 0.0029  | 0.0096                          | 0.0155           |                        |
| GSE9037 CTRL VS LPS 4H STIM BMDM DN                       | 201                 | 9 (4.5)                   | 9 (4.5)                     | 0 (0)                         | 0.003   | 0.0099                          | 0.0154           | dnc                    |

**Table A19:** Significantly enriched MSigDB Immunologic Signature Sets (RNA-Seq, PBMC, Day 1). Results sorted by FDR and Jaccard index. The last column indicates overlap with cell type-specific results: dnc: dendritic cells, mnc: monocytes, neu: neutrophils, tcl: T-cells, nkc: NK-cells, bcl: B-cells.

| Study Visit | Input<br>Gene<br>Variables | Selected<br>Gene<br>Variables | Mean<br>Squared<br>Error | SDEG [%] | Opt. $\lambda$ | Intercept |
|-------------|----------------------------|-------------------------------|--------------------------|----------|----------------|-----------|
| Day 1       | 738                        | 15                            | 4.67                     | 80       | 1.8872         | 4.1763    |
| Day 3       | 46                         | 5                             | 5.43                     | 0        | 1.3319         | 4.6850    |
| Day 7       | 61                         | 17                            | 3.32                     | 0        | 0.8291         | 3.9268    |
| Day 28      | 29                         | 6                             | 5.79                     | 0        | 0.5915         | 4.5415    |

**Table A20:** Regularized linear logistic regression model summary statistics (RNA-Seq, PBMC).  $\text{Log}_2$  transformed peak HAI titer was used as the response variable. The predictor variables included standardized gene variables with  $\geq 1.5$  absolute fold change for the respective post-vaccination day in either treatment group. SDEG [%]: percent overlap between selected genes (HAI pos. vs. neg.) and differentially expressed genes (AS03 vs. PBS).

| Package Name | Version  | Package Name    | Version  | Package Name | Version |
|--------------|----------|-----------------|----------|--------------|---------|
| bitops       | 1.0-6    | RGCCA           | 2.0      | foreach      | 1.4.1   |
| caTools      | 1.16     | rgl             | 0.93.996 | Matrix       | 1.1-2   |
| chron        | 2.3-45   | R.methodsS3     | 1.6.1    | plyr         | 1.8.1   |
| codetools    | 0.2-8    | R.oo            | 1.18.0   | mixOmics     | 5.0-3   |
| digest       | 0.6.4    | R.utils         | 1.29.8   | gtools       | 3.3.0   |
| evaluate     | 0.5.1    | stats4          | 3.0.1    | vegan        | 2.0-10  |
| formatR      | 0.10     | stringr         | 0.6.2    | lattice      | 0.20-27 |
| gdata        | 2.13.2   | tools           | 3.0.1    | permute      | 0.8-3   |
| grid         | 3.0.1    | coin            | 1.0-23   | gplots       | 2.12.1  |
| igraph       | 0.7.1    | survival        | 2.37-7   | MASS         | 7.3-29  |
| iterators    | 1.0.6    | impute          | 1.34.0   | car          | 2.0-19  |
| KernSmooth   | 2.23-10  | sqldf           | 0.4-7    | png          | 0.1-7   |
| modeltools   | 0.2-21   | RSQLite.extfuns | 0.0.1    | edgeR        | 3.2.4   |
| mvtnorm      | 0.9-9997 | RSQLite         | 0.11.4   | limma        | 3.16.8  |
| nnet         | 7.3-7    | DBI             | 0.2-7    | xtable       | 1.7-1   |
| pheatmap     | 0.7.7    | gsubfn          | 0.6-5    | knitr        | 1.5     |
| RColorBrewer | 1.0-5    | proto           | 0.3-10   |              |         |
| Rcpp         | 0.11.0   | glmnet          | 2.0-2    |              |         |

**Table A21:** List of R packages and versions used for the analyses presented in this report. R version 3.0.1 (2013-05-16) 'Good Sport' run on Ubuntu (release 13.04, x86-64-pc-linux-gnu (64-bit) platform).

## References

Robinson, Mark D., and Alicia Oshlack. "A scaling normalization method for differential expression analysis of RNA-seq data." *Genome Biol* 11.3 (2010): R25.

McCarthy, Davis J., Yunshun Chen, and Gordon K. Smyth. "Differential expression analysis of multifactor RNA-Seq experiments with respect to biological variation." *Nucleic acids research* (2012): gks042.

Young, Matthew D., et al. "Method Gene ontology analysis for RNA-seq: accounting for selection bias." *Genome Biol* 11 (2010): R14
